# Supplementary material for: Integrative multi-omics analysis identified FUT9 and MS4A3 as novel immune-phenotype and prognosis biomarkers for colorectal cancer and analyze the role of FUT9 in oncoimmunology
Source: Research Square preprint supplement (doi:10.21203/rs.3.rs-8306096/v1), 2025-12-09
Supplement: Supplementary file 1 [file 479d6386ab25baac63bdcbd2.xlsx]

## Sheet: Sheet1
ID	sig	chrom	chromStart	chromEnd	strand	gene
cg00002426	Up_In_A2	chr3	57743542	57743544	.	SLMAP
cg00008971	Up_In_A2	chr1	45966924	45966926	.	MMACHC	CCDC163P
cg00011239	Up_In_A2	chr2	20876219	20876221	.	GDF7
cg00012148	Up_In_A2	chr6	54172996	54172998	.	TINAG
cg00014484	Up_In_A2	chr12	131865278	131865280	.	LOC338797
cg00016324	Up_In_A2	chr2	144223681	144223683	.	ARHGAP15
cg00018198	Up_In_A2	chr2	65297246	65297248	.	CEP68
cg00022997	Up_In_A2	chr6	31650807	31650809	.	LY6G5C
cg00024046	Up_In_A2	chr2	20398357	20398359	.	SDC1
cg00029979	Up_In_A2	chr17	49027094	49027096	.	TOB1
cg00033304	Up_In_A2	chr3	185302691	185302693	.	SENP2
cg00035630	Up_In_A2	chr11	33036663	33036665	.	DEPDC7
cg00037117	Up_In_A2	chrX	44730717	44730719	.	KDM6A
cg00037856	Up_In_A2	chr3	127633626	127633628	.	KBTBD12
cg00047683	Up_In_A2	chr16	72034121	72034123	.	PKD1L3
cg00049475	Up_In_A2	chr10	29923735	29923737	.	SVIL	BC070247
cg00049868	Up_In_A2	chr2	11245406	11245408	.	AX746649
cg00052246	Up_In_A2	chr3	71106251	71106253	.	FOXP1
cg00053755	Up_In_A2	chr5	139728710	139728712	.	HBEGF
cg00053916	Up_In_A2	chr8	37457328	37457330	.	U6
cg00056066	Up_In_A2	chr10	25010737	25010739	.	ARHGAP21
cg00058887	Up_In_A2	chr4	184909017	184909019	.	STOX2
cg00059737	Up_In_A2	chr1	12400433	12400435	.	VPS13D
cg00061185	Up_In_A2	chr12	50596346	50596348	.	LIMA1
cg00066270	Up_In_A2	chr1	186265269	186265271	.	PRG4	MIR548F1
cg00067884	Up_In_A2	chr15	63970197	63970199	.	HERC1	AK091624
cg00069391	Up_In_A2	chr7	3419304	3419306	.	SDK1
cg00070899	Up_In_A2	chr6	34024478	34024480	.	GRM4
cg00079169	Up_In_A2	chr19	2811668	2811670	.	THOP1
cg00081417	Up_In_A2	chr6	140400136	140400138	.	5S_rRNA
cg00084643	Up_In_A2	chr5	125936115	125936117	.	PHAX
cg00087244	Up_In_A2	chr7	74042486	74042488	.	GTF2I
cg00091302	Up_In_A2	chr1	182602985	182602987	.	LOC284648
cg00093956	Up_In_A2	chr12	107372430	107372432	.	MTERFD3
cg00094158	Up_In_A2	chr10	126435794	126435796	.	FAM53B
cg00100538	Up_In_A2	chr4	184067791	184067793	.	WWC2	U7
cg00100703	Up_In_A2	chr17	33514884	33514886	.	UNC45B	SLC35G3
cg00103771	Up_In_A2	chr6	32525804	32525806	.	HLA-DRB6
cg00105102	Up_In_A2	chr1	156217177	156217179	.	PAQR6
cg00109764	Up_In_A2	chr3	43811307	43811309	.	ABHD5
cg00114694	Up_In_A2	chr15	40644727	40644729	.	PHGR1
cg00120783	Up_In_A2	chr17	1472872	1472874	.	PITPNA
cg00129785	Up_In_A2	chr21	47455452	47455454	.	COL6A1
cg00130808	Up_In_A2	chr15	37178908	37178910	.	LOC145845
cg00137385	Up_In_A2	chr18	46288004	46288006	.	KIAA0427	CTIF
cg00142036	Up_In_A2	chr10	13388441	13388443	.	SEPHS1
cg00143606	Up_In_A2	chr5	10759382	10759384	.	DAP
cg00145141	Up_In_A2	chr17	4464021	4464023	.	GGT6
cg00145683	Up_In_A2	chr16	51915088	51915090	.	LOC388276
cg00147943	Up_In_A2	chr1	68225712	68225714	.	GNG12	U7
cg00148587	Up_In_A2	chrX	49642079	49642081	.	LOC158572
cg00150025	Up_In_A2	chr15	42448078	42448080	.	PLA2G4F
cg00156802	Up_In_A2	chrX	19358456	19358458	.	PDHA1
cg00159289	Up_In_A2	chr7	100844059	100844061	.	MOGAT3
cg00163372	Up_In_A2	chr8	128752987	128752989	.	MYC
cg00167158	Up_In_A2	chr2	157909643	157909645	.	Mir_548
cg00169019	Up_In_A2	chr6	32056437	32056439	.	TNXB
cg00177290	Up_In_A2	chr1	110161284	110161286	.	AMPD2
cg00178728	Up_In_A2	chr4	22516157	22516159	.	GPR125
cg00179663	Up_In_A2	chr4	92189704	92189706	.	FAM190A	5S_rRNA
cg00180559	Up_In_A2	chr1	233496767	233496769	.	KIAA1804
cg00185066	Up_In_A2	chr13	80910762	80910764	.	SPRY2
cg00192966	Up_In_A2	chr5	167688101	167688103	.	ODZ2	WWC1
cg00211115	Up_In_A2	chr11	69257735	69257737	.	AK094674
cg00212786	Up_In_A2	chr2	133171940	133171942	.	GPR39
cg00213668	Up_In_A2	chr7	98028206	98028208	.	BAIAP2L1
cg00220677	Up_In_A2	chr5	35230934	35230936	.	PRLR
cg00223767	Up_In_A2	chr11	75831714	75831716	.	UVRAG
cg00224028	Up_In_A2	chr7	84671332	84671334	.	SEMA3D
cg00225196	Up_In_A2	chr8	37556862	37556864	.	ZNF703
cg00232831	Up_In_A2	chr2	161113855	161113857	.	ITGB6
cg00234370	Up_In_A2	chr1	36021673	36021675	.	KIAA0319L
cg00235460	Up_In_A2	chr2	175867416	175867418	.	CHN1
cg00236305	Up_In_A2	chr2	1796075	1796077	.	MYT1L	PXDN
cg00238283	Up_In_A2	chr7	158059789	158059791	.	PTPRN2	DQ583756
cg00240378	Up_In_A2	chr2	8850019	8850021	.	ID2
cg00241273	Up_In_A2	chr13	107172855	107172857	.	EFNB2
cg00244040	Up_In_A2	chr14	61788913	61788915	.	PRKCH
cg00244111	Up_In_A2	chr3	149086883	149086885	.	TM4SF1
cg00246969	Up_In_A2	chr13	99159655	99159657	.	STK24
cg00249032	Up_In_A2	chr20	43975751	43975753	.	SDC4
cg00250409	Up_In_A2	chr16	73206309	73206311	.	HTA
cg00251358	Up_In_A2	chr5	81931500	81931502	.	MIR3977
cg00252149	Up_In_A2	chr1	228611268	228611270	.	HIST3H3
cg00263677	Up_In_A2	chr16	84885229	84885231	.	CRISPLD2
cg00264129	Up_In_A2	chr5	139725092	139725094	.	HBEGF
cg00268149	Up_In_A2	chr4	184017789	184017791	.	C4orf38
cg00271177	Up_In_A2	chr3	193849982	193849984	.	HES1
cg00273543	Up_In_A2	chr13	103055486	103055488	.	FGF14
cg00280345	Up_In_A2	chr8	145728387	145728389	.	GPT
cg00283535	Up_In_A2	chr8	124749563	124749565	.	ANXA13
cg00284420	Up_In_A2	chr16	87311947	87311949	.	AK125749
cg00285343	Up_In_A2	chr7	41733355	41733357	.	INHBA	LOC285954
cg00290158	Up_In_A2	chr20	5092800	5092802	.	C20orf30
cg00295293	Up_In_A2	chr8	75234614	75234616	.	JPH1
cg00299603	Up_In_A2	chr5	64494333	64494335	.	ADAMTS6
cg00303745	Up_In_A2	chr7	50133211	50133213	.	ZPBP
cg00305740	Up_In_A2	chr7	73392696	73392698	.	ELN
cg00318322	Up_In_A2	chr16	67708821	67708823	.	GFOD2	AX747090
cg00318947	Up_In_A2	chr7	27154913	27154915	.	HOXA3
cg00319312	Up_In_A2	chr1	203671139	203671141	.	ATP2B4
cg00321478	Up_In_A2	chr1	197238397	197238399	.	CRB1
cg00324128	Up_In_A2	chr2	166325613	166325615	.	CSRNP3
cg00324366	Up_In_A2	chr8	32199182	32199184	.	NRG1	5S_rRNA
cg00325139	Up_In_A2	chr6	57178622	57178624	.	PRIM2
cg00326648	Up_In_A2	chr2	61246247	61246249	.	PEX13	PUS10
cg00329101	Up_In_A2	chr3	14338920	14338922	.	AX747368
cg00331616	Up_In_A2	chr13	20207200	20207202	.	MPHOSPH8
cg00334933	Up_In_A2	chr7	84629716	84629718	.	SEMA3D
cg00335735	Up_In_A2	chr2	222355483	222355485	.	EPHA4
cg00339782	Up_In_A2	chr1	149908098	149908100	.	MTMR11
cg00342358	Up_In_A2	chr1	92350111	92350113	.	TGFBR3
cg00351813	Up_In_A2	chr17	29926183	29926185	.	mir-108-1
cg00353353	Up_In_A2	chr7	157371979	157371981	.	PTPRN2	MIR153-2
cg00356916	Up_In_A2	chr1	116256617	116256619	.	CASQ2
cg00367962	Up_In_A2	chr2	240508664	240508666	.	BC132948
cg00375132	Up_In_A2	chr10	22768369	22768371	.	LOC100499489
cg00375146	Up_In_A2	chr11	1221811	1221813	.	MUC5AC
cg00379983	Up_In_A2	chrX	129042627	129042629	.	UTP14A
cg00381745	Up_In_A2	chr7	99096449	99096451	.	ZNF394
cg00383136	Up_In_A2	chr6	32410246	32410248	.	HLA-DRA
cg00386405	Up_In_A2	chr19	30863274	30863276	.	ZNF536
cg00388262	Up_In_A2	chr4	1554465	1554467	.	AX748388
cg00397103	Up_In_A2	chr1	5540007	5540009	.	MIR4417
cg00402547	Up_In_A2	chr18	6835381	6835383	.	ARHGAP28
cg00404923	Up_In_A2	chr4	184882210	184882212	.	STOX2
cg00406211	Up_In_A2	chr10	121077021	121077023	.	GRK5	MIR4681
cg00409861	Up_In_A2	chr5	143365768	143365770	.	Metazoa_SRP
cg00413352	Up_In_A2	chr1	2847212	2847214	.	ACTRT2
cg00415057	Up_In_A2	chr16	68333693	68333695	.	SLC7A6	SLC7A6OS
cg00430287	Up_In_A2	chr6	116382875	116382877	.	FRK
cg00431187	Up_In_A2	chr7	27161748	27161750	.	HOXA3	BC035889
cg00439378	Up_In_A2	chr6	36210536	36210538	.	PNPLA1
cg00451105	Up_In_A2	chr13	29104081	29104083	.	FLT1
cg00453735	Up_In_A2	chr10	33321729	33321731	.	ITGB1
cg00454274	Up_In_A2	chr1	54200586	54200588	.	GLIS1
cg00460916	Up_In_A2	chr17	3698238	3698240	.	ITGAE
cg00471141	Up_In_A2	chr8	19796298	19796300	.	LPL
cg00476430	Up_In_A2	chr8	81947740	81947742	.	PAG1
cg00480115	Up_In_A2	chr19	35606876	35606878	.	FXYD3
cg00480856	Up_In_A2	chr7	123390034	123390036	.	WASL	AL110181
cg00484488	Up_In_A2	chr15	73076982	73076984	.	ADPGK
cg00492055	Up_In_A2	chr3	138312355	138312357	.	CEP70
cg00493716	Up_In_A2	chr18	77545027	77545029	.	KCNG2
cg00494287	Up_In_A2	chr7	105518488	105518490	.	ATXN7L1	CDHR3
cg00494919	Up_In_A2	chr10	135020821	135020823	.	KNDC1
cg00498816	Up_In_A2	chr3	13665021	13665023	.	FBLN2	BC152380
cg00500789	Up_In_A2	chr1	43751369	43751371	.	C1orf210
cg00507154	Up_In_A2	chr19	50192738	50192740	.	C19orf76
cg00510320	Up_In_A2	chr16	67686942	67686944	.	RLTPR	DL491203
cg00510507	Up_In_A2	chr10	61900412	61900414	.	ANK3
cg00516870	Up_In_A2	chr17	76838008	76838010	.	USP36
cg00522231	Up_In_A2	chr2	9549276	9549278	.	ITGB1BP1
cg00525683	Up_In_A2	chr5	156948580	156948582	.	ADAM19
cg00532399	Up_In_A2	chr5	171209552	171209554	.	FBXW11
cg00535683	Up_In_A2	chr1	153114001	153114003	.	SPRR2C	SPRR2A
cg00539925	Up_In_A2	chr1	160366520	160366522	.	VANGL2
cg00543684	Up_In_A2	chr13	113652979	113652981	.	MCF2L
cg00554948	Up_In_A2	chr12	51631857	51631859	.	DAZAP2
cg00561527	Up_In_A2	chr19	14193397	14193399	.	SAMD1
cg00562553	Up_In_A2	chr7	27169739	27169741	.	HOXA4
cg00563031	Up_In_A2	chr5	119782695	119782697	.	PRR16
cg00570580	Up_In_A2	chr2	111447254	111447256	.	DQ573754
cg00570628	Up_In_A2	chr11	17563124	17563126	.	USH1C
cg00572966	Up_In_A2	chr7	21410395	21410397	.	SP4
cg00573857	Up_In_A2	chr5	981188	981190	.	LOC100506688
cg00574742	Up_In_A2	chr5	2223623	2223625	.	IRX4
cg00574819	Up_In_A2	chr4	128981251	128981253	.	LARP1B
cg00575672	Up_In_A2	chr4	100644170	100644172	.	AL832378
cg00577167	Up_In_A2	chr9	104197674	104197676	.	ALDOB
cg00582562	Up_In_A2	chr17	46388464	46388466	.	SKAP1
cg00583861	Up_In_A2	chr1	32014362	32014364	.	TINAGL1
cg00589737	Up_In_A2	chr5	77252275	77252277	.	TRNA_Pseudo
cg00601387	Up_In_A2	chr5	110427071	110427073	.	WDR36
cg00603435	Up_In_A2	chr2	142889366	142889368	.	LRP1B
cg00607609	Up_In_A2	chr4	119962921	119962923	.	SYNPO2	Myopodin
cg00609630	Up_In_A2	chr12	123258652	123258654	.	CCDC62
cg00615469	Up_In_A2	chr4	99580848	99580850	.	TSPAN5
cg00618087	Up_In_A2	chr17	16282381	16282383	.	UBB
cg00618626	Up_In_A2	chr17	39807900	39807902	.	KRT42P
cg00620224	Up_In_A2	chr14	32030175	32030177	.	NUBPL
cg00622170	Up_In_A2	chr4	2944593	2944595	.	C4orf10	NOP14
cg00636416	Up_In_A2	chr2	100718911	100718913	.	AFF3
cg00636769	Up_In_A2	chr20	57408794	57408796	.	GNASAS	GNAS
cg00651016	Up_In_A2	chr16	552753	552755	.	RAB11FIP3
cg00657094	Up_In_A2	chr1	1174189	1174191	.	B3GALT6
cg00664343	Up_In_A2	chr3	137902225	137902227	.	ARMC8
cg00683329	Up_In_A2	chr18	77545135	77545137	.	KCNG2
cg00684594	Up_In_A2	chr11	57519469	57519471	.	BTBD18
cg00686429	Up_In_A2	chr19	18207234	18207236	.	MAST3
cg00689360	Up_In_A2	chr4	100273994	100273996	.	ADH1C
cg00694520	Up_In_A2	chr2	223916686	223916688	.	KCNE4
cg00698444	Up_In_A2	chr13	107910971	107910973	.	FAM155A	SNORD31
cg00699919	Up_In_A2	chr1	168058591	168058593	.	GPR161	AX746887
cg00700728	Up_In_A2	chr4	76480680	76480682	.	C4orf26
cg00712965	Up_In_A2	chr3	125683963	125683965	.	ROPN1B
cg00717080	Up_In_A2	chr21	44483603	44483605	.	CBS
cg00730887	Up_In_A2	chr4	160149603	160149605	.	RAPGEF2
cg00732656	Up_In_A2	chr3	150459813	150459815	.	SIAH2
cg00738345	Up_In_A2	chr17	55940529	55940531	.	CUEDC1	MRPS23
cg00744433	Up_In_A2	chr21	18884066	18884068	.	CXADR
cg00744866	Up_In_A2	chr3	33701208	33701210	.	CLASP2
cg00757033	Up_In_A2	chr12	89920649	89920651	.	WDR51B	POC1B
cg00757453	Up_In_A2	chrX	17986296	17986298	.	RAI2
cg00758374	Up_In_A2	chr3	111804342	111804344	.	C3orf52
cg00759301	Up_In_A2	chr1	82165109	82165111	.	LPHN2
cg00759741	Up_In_A2	chr16	88603886	88603888	.	C16orf85
cg00769161	Up_In_A2	chr12	58130182	58130184	.	AGAP2
cg00773370	Up_In_A2	chr12	6483771	6483773	.	SCNN1A
cg00776080	Up_In_A2	chr12	53442321	53442323	.	TENC1
cg00777079	Up_In_A2	chr17	1666606	1666608	.	SERPINF1
cg00777198	Up_In_A2	chr12	52828272	52828274	.	KRT75
cg00777445	Up_In_A2	chr17	48970356	48970358	.	TOB1
cg00788204	Up_In_A2	chr9	136758037	136758039	.	VAV2
cg00789198	Up_In_A2	chr19	42007377	42007379	.	LOC100505495
cg00804587	Up_In_A2	chr3	190038678	190038680	.	CLDN1
cg00816406	Up_In_A2	chr1	240286625	240286627	.	FMN2
cg00818899	Up_In_A2	chr14	23291484	23291486	.	SLC7A7
cg00819310	Up_In_A2	chr1	116193782	116193784	.	VANGL1
cg00821310	Up_In_A2	chr1	6420732	6420734	.	ACOT7
cg00821600	Up_In_A2	chr2	142889383	142889385	.	LRP1B
cg00824381	Up_In_A2	chr16	31708459	31708461	.	KIAA0664L3
cg00826537	Up_In_A2	chr1	225068757	225068759	.	DNAH14
cg00831726	Up_In_A2	chr3	142700875	142700877	.	PAQR9
cg00833703	Up_In_A2	chr16	57809841	57809843	.	KIFC3
cg00835193	Up_In_A2	chr19	2291779	2291781	.	LINGO3
cg00835828	Up_In_A2	chr7	150069889	150069891	.	REPIN1
cg00838397	Up_In_A2	chr10	70992224	70992226	.	HKDC1
cg00842076	Up_In_A2	chr14	89881834	89881836	.	FOXN3
cg00847221	Up_In_A2	chr17	64948441	64948443	.	CACNG4
cg00848374	Up_In_A2	chr1	215179215	215179217	.	KCNK2
cg00851518	Up_In_A2	chr1	27676651	27676653	.	SYTL1
cg00856273	Up_In_A2	chr1	82165094	82165096	.	LPHN2
cg00856336	Up_In_A2	chr6	169399759	169399761	.	AF086258
cg00859129	Up_In_A2	chr1	109422183	109422185	.	GPSM2
cg00861010	Up_In_A2	chr1	41966112	41966114	.	EDN2
cg00861695	Up_In_A2	chr13	24736454	24736456	.	SPATA13	MIR2276
cg00863469	Up_In_A2	chr19	49116422	49116424	.	FAM83E
cg00865390	Up_In_A2	chr8	91713321	91713323	.	BC040572
cg00866541	Up_In_A2	chr16	85395660	85395662	.	LOC727710
cg00866690	Up_In_A2	chr1	2066630	2066632	.	PRKCZ
cg00869533	Up_In_A2	chr2	58386676	58386678	.	FANCL	VRK2
cg00871207	Up_In_A2	chr14	89080249	89080251	.	EML5
cg00872104	Up_In_A2	chr16	50573060	50573062	.	NKD1
cg00873919	Up_In_A2	chr3	57743598	57743600	.	SLMAP
cg00875382	Up_In_A2	chr4	103542235	103542237	.	NFKB1
cg00876266	Up_In_A2	chr19	5915132	5915134	.	CAPS
cg00878747	Up_In_A2	chr19	45822961	45822963	.	CKM
cg00879667	Up_In_A2	chr19	5915214	5915216	.	CAPS
cg00885918	Up_In_A2	chr20	30406996	30406998	.	MYLK2
cg00892792	Up_In_A2	chr8	142297583	142297585	.	SLC45A4
cg00897058	Up_In_A2	chr2	114047064	114047066	.	LOC440839	PAX8
cg00898480	Up_In_A2	chr17	74641274	74641276	.	ST6GALNAC1
cg00901574	Up_In_A2	chr20	30804996	30804998	.	POFUT1
cg00909094	Up_In_A2	chr3	12586367	12586369	.	LOC100129480
cg00911318	Up_In_A2	chr11	57423922	57423924	.	CLP1
cg00911776	Up_In_A2	chr7	130682238	130682240	.	FLJ43663	LOC646329
cg00919013	Up_In_A2	chr8	12613846	12613848	.	LONRF1
cg00921219	Up_In_A2	chr12	131455512	131455514	.	GPR133
cg00921973	Up_In_A2	chr9	130701075	130701077	.	DPM2
cg00929635	Up_In_A2	chr20	44035917	44035919	.	DBNDD2	SYS1-DBNDD2
cg00933763	Up_In_A2	chr7	27976025	27976027	.	JAZF1
cg00945443	Up_In_A2	chr6	151366390	151366392	.	MTHFD1L	U6
cg00948085	Up_In_A2	chr7	25890571	25890573	.	MIR148A
cg00950244	Up_In_A2	chr6	97344670	97344672	.	NDUFAF4
cg00950343	Up_In_A2	chr5	111312497	111312499	.	C5orf13	NREP
cg00961617	Up_In_A2	chr17	37782379	37782381	.	PPP1R1B
cg00961640	Up_In_A2	chr1	110933766	110933768	.	SLC16A4
cg00969323	Up_In_A2	chr2	242627865	242627867	.	DTYMK
cg00977842	Up_In_A2	chr10	82050792	82050794	.	MAT1A
cg00988577	Up_In_A2	chr6	32978547	32978549	.	HLA-DOA
cg00989002	Up_In_A2	chr16	52225568	52225570	.	Mir_548
cg00991994	Up_In_A2	chr3	99639552	99639554	.	MIR548G	FILIP1L	C3orf26	AF090939
cg00994717	Up_In_A2	chr10	102731538	102731540	.	SEMA4G
cg00997611	Up_In_A2	chr2	173600675	173600677	.	LOC91149	RAPGEF4
cg01005365	Up_In_A2	chr5	76029521	76029523	.	F2R
cg01009920	Up_In_A2	chr8	8153649	8153651	.	FLJ10661
cg01010517	Up_In_A2	chr8	117952707	117952709	.	C8orf85	AL832163
cg01012713	Up_In_A2	chr8	1960216	1960218	.	KBTBD11
cg01013868	Up_In_A2	chr14	101449838	101449840	.	SNORD114-23	SNORD114-24
cg01020368	Up_In_A2	chr2	205070148	205070150	.	ICOS
cg01020475	Up_In_A2	chr13	114304811	114304813	.	ATP4B
cg01021196	Up_In_A2	chr14	38340163	38340165	.	AK125955
cg01021952	Up_In_A2	chr20	42187631	42187633	.	SGK2
cg01023593	Up_In_A2	chr19	58962092	58962094	.	ZNF324B
cg01026256	Up_In_A2	chr3	183959087	183959089	.	MIR1224	VWA5B2
cg01026796	Up_In_A2	chr5	54602542	54602544	.	SKIV2L2	DHX29
cg01030321	Up_In_A2	chr19	39191646	39191648	.	ACTN4	CAPN12
cg01030757	Up_In_A2	chr15	73866327	73866329	.	NPTN
cg01035923	Up_In_A2	chr14	32544479	32544481	.	ARHGAP5-AS1
cg01040779	Up_In_A2	chr4	187629338	187629340	.	FAT1
cg01041239	Up_In_A2	chr18	13222580	13222582	.	C18orf1
cg01041405	Up_In_A2	chr16	68440619	68440621	.	SMPD3
cg01046070	Up_In_A2	chr16	74730198	74730200	.	MLKL
cg01047476	Up_In_A2	chr10	118380395	118380397	.	PNLIPRP2
cg01052276	Up_In_A2	chr2	97200488	97200490	.	ARID5A
cg01054110	Up_In_A2	chr12	125002331	125002333	.	NCOR2
cg01054938	Up_In_A2	chr17	48712922	48712924	.	ABCC3
cg01057882	Up_In_A2	chr14	54405360	54405362	.	BMP4
cg01058342	Up_In_A2	chr3	133048305	133048307	.	TMEM108	BFSP2
cg01064725	Up_In_A2	chr1	204461713	204461715	.	PIK3C2B
cg01070161	Up_In_A2	chr3	197547890	197547892	.	LRCH3
cg01078582	Up_In_A2	chr21	42212600	42212602	.	DSCAM
cg01080368	Up_In_A2	chr2	135480455	135480457	.	TMEM163
cg01081168	Up_In_A2	chr1	212278485	212278487	.	MIR3122
cg01083652	Up_In_A2	chr15	71629207	71629209	.	THSD4
cg01089331	Up_In_A2	chr4	18024928	18024930	.	LCORL
cg01089602	Up_In_A2	chr13	113760100	113760102	.	F7
cg01089914	Up_In_A2	chr2	218843228	218843230	.	TNS1
cg01093854	Up_In_A2	chr10	70362421	70362423	.	TET1
cg01094891	Up_In_A2	chr19	31048116	31048118	.	ZNF536	AK091070
cg01095004	Up_In_A2	chr16	88454882	88454884	.	ZNF469
cg01102232	Up_In_A2	chr3	132135369	132135371	.	DNAJC13
cg01105418	Up_In_A2	chr1	244214592	244214594	.	ZNF238
cg01109574	Up_In_A2	chr2	36824258	36824260	.	FEZ2
cg01110839	Up_In_A2	chr11	47437782	47437784	.	SLC39A13
cg01111006	Up_In_A2	chr6	11161657	11161659	.	Mir_684
cg01112778	Up_In_A2	chr5	146460986	146460988	.	PPP2R2B
cg01113896	Up_In_A2	chr10	34836432	34836434	.	PARD3
cg01115560	Up_In_A2	chrX	75647435	75647437	.	MAGEE1
cg01121978	Up_In_A2	chr7	5342325	5342327	.	SLC29A4
cg01129320	Up_In_A2	chr13	102064941	102064943	.	NALCN
cg01132443	Up_In_A2	chr17	74735057	74735059	.	MFSD11
cg01134643	Up_In_A2	chr10	5406947	5406949	.	UCN3
cg01144225	Up_In_A2	chr16	2574237	2574239	.	AMDHD2
cg01145653	Up_In_A2	chr3	125775695	125775697	.	SLC41A3
cg01149239	Up_In_A2	chr3	196746084	196746086	.	MFI2
cg01149677	Up_In_A2	chr16	1808229	1808231	.	MAPK8IP3	NME3
cg01165442	Up_In_A2	chr4	74465187	74465189	.	RASSF6
cg01165683	Up_In_A2	chr3	24430956	24430958	.	THRB
cg01170129	Up_In_A2	chr2	110448268	110448270	.	SOWAHC
cg01171456	Up_In_A2	chr7	2726645	2726647	.	AMZ1
cg01174811	Up_In_A2	chr5	58882938	58882940	.	PDE4D
cg01188509	Up_In_A2	chr6	160509294	160509296	.	IGF2R	LOC729603
cg01189072	Up_In_A2	chr1	1610659	1610661	.	LOC728661	CDK11B	SLC35E2
cg01192745	Up_In_A2	chr3	31239039	31239041	.	GADL1
cg01201348	Up_In_A2	chr7	35073883	35073885	.	DPY19L1
cg01206378	Up_In_A2	chr1	95698826	95698828	.	RWDD3	AK090700
cg01207684	Up_In_A2	chr16	4103166	4103168	.	ADCY9
cg01215651	Up_In_A2	chr4	165675137	165675139	.	LOC100505989
cg01215742	Up_In_A2	chr16	1069550	1069552	.	SOX8
cg01219549	Up_In_A2	chr9	140683648	140683650	.	EHMT1
cg01221209	Up_In_A2	chr5	554885	554887	.	MIR4456
cg01227246	Up_In_A2	chr2	8988573	8988575	.	KIDINS220
cg01231543	Up_In_A2	chr16	68741747	68741749	.	CDH1
cg01233392	Up_In_A2	chr1	85665443	85665445	.	SYDE2
cg01235659	Up_In_A2	chr5	16738046	16738048	.	MYO10
cg01239922	Up_In_A2	chr5	191241	191243	.	LRRC14B
cg01246617	Up_In_A2	chr5	53751492	53751494	.	HSPB3
cg01256846	Up_In_A2	chr15	90456540	90456542	.	C15orf38	C15orf38-AP3S2
cg01260308	Up_In_A2	chr14	50233661	50233663	.	KLHDC2
cg01263631	Up_In_A2	chr16	88485470	88485472	.	ZNF469
cg01269191	Up_In_A2	chr12	25404802	25404804	.	KRAS
cg01270709	Up_In_A2	chr11	57519363	57519365	.	BTBD18
cg01274524	Up_In_A2	chr7	145280277	145280279	.	DQ597485
cg01274916	Up_In_A2	chr22	31062285	31062287	.	DUSP18
cg01282204	Up_In_A2	chr11	59612936	59612938	.	GIF
cg01286133	Up_In_A2	chr21	27540105	27540107	.	APP	AK074469
cg01291088	Up_In_A2	chr16	67687647	67687649	.	RLTPR	DL491203
cg01292856	Up_In_A2	chr11	65242575	65242577	.	MALAT1
cg01297349	Up_In_A2	chr12	2049038	2049040	.	LOC100271702
cg01300852	Up_In_A2	chr6	166955884	166955886	.	RPS6KA2
cg01301885	Up_In_A2	chr10	128258569	128258571	.	C10orf90
cg01303236	Up_In_A2	chr5	73934841	73934843	.	ENC1	HEXB
cg01303385	Up_In_A2	chr3	111451469	111451471	.	PHLDB2	PLCXD2
cg01315201	Up_In_A2	chr13	45333292	45333294	.	LOC144817
cg01317569	Up_In_A2	chr5	60140823	60140825	.	ELOVL7
cg01325552	Up_In_A2	chr4	187025419	187025421	.	TLR3
cg01331772	Up_In_A2	chr2	131094826	131094828	.	TRNA_Glu
cg01341655	Up_In_A2	chr4	62202293	62202295	.	LPHN3
cg01345354	Up_In_A2	chr6	2892151	2892153	.	SERPINB9
cg01349088	Up_In_A2	chr20	30012192	30012194	.	DEFB122	NR_002577
cg01349489	Up_In_A2	chr21	32720029	32720031	.	TIAM1
cg01354879	Up_In_A2	chr6	84140049	84140051	.	ME1
cg01358444	Up_In_A2	chr6	56406083	56406085	.	DST
cg01362358	Up_In_A2	chr17	58117359	58117361	.	MIR4737
cg01366985	Up_In_A2	chr6	25167694	25167696	.	CMAHP
cg01369033	Up_In_A2	chr4	3292385	3292387	.	RGS12
cg01375262	Up_In_A2	chr16	73266784	73266786	.	HTA
cg01377459	Up_In_A2	chr2	145325737	145325739	.	ZEB2_AS1_4
cg01377807	Up_In_A2	chr3	99795239	99795241	.	FILIP1L	C3orf26
cg01379237	Up_In_A2	chr3	189983743	189983745	.	CLDN1
cg01383128	Up_In_A2	chr2	208629715	208629717	.	FZD5
cg01394884	Up_In_A2	chr4	186961191	186961193	.	U4
cg01404067	Up_In_A2	chr22	45704674	45704676	.	FAM118A
cg01410314	Up_In_A2	chr9	77641436	77641438	.	C9orf41
cg01410453	Up_In_A2	chr2	74753357	74753359	.	DQX1
cg01410615	Up_In_A2	chr2	242164066	242164068	.	ANO7
cg01418539	Up_In_A2	chr2	173098735	173098737	.	DLX2
cg01420491	Up_In_A2	chr2	20834623	20834625	.	HS1BP3
cg01421119	Up_In_A2	chr1	211555732	211555734	.	C1orf97	LINC00467
cg01424889	Up_In_A2	chr12	58211192	58211194	.	AVIL
cg01426125	Up_In_A2	chr6	17817689	17817691	.	KIF13A
cg01426475	Up_In_A2	chr7	22397831	22397833	.	RAPGEF5
cg01433654	Up_In_A2	chr5	53605191	53605193	.	ARL15
cg01434302	Up_In_A2	chr8	3267207	3267209	.	CSMD1
cg01438868	Up_In_A2	chr3	177802380	177802382	.	U6
cg01441127	Up_In_A2	chr1	181012491	181012493	.	MR1
cg01441308	Up_In_A2	chr2	127811852	127811854	.	BIN1
cg01443318	Up_In_A2	chr16	67466259	67466261	.	HSD11B2
cg01445827	Up_In_A2	chr1	96952955	96952957	.	7SK
cg01447702	Up_In_A2	chr2	65282028	65282030	.	CEP68
cg01454638	Up_In_A2	chr2	175661560	175661562	.	CHRNA1
cg01455178	Up_In_A2	chr1	205648186	205648188	.	SLC45A3
cg01457778	Up_In_A2	chr2	109158266	109158268	.	LIMS1
cg01457883	Up_In_A2	chr8	335352	335354	.	FBXO25
cg01463828	Up_In_A2	chr8	22446720	22446722	.	PDLIM2	FLJ00072
cg01466348	Up_In_A2	chr2	161503842	161503844	.	RBMS1
cg01472176	Up_In_A2	chr1	226074945	226074947	.	LEFTY1
cg01477361	Up_In_A2	chr2	79621210	79621212	.	CTNNA2
cg01481251	Up_In_A2	chr11	32912718	32912720	.	QSER1
cg01484799	Up_In_A2	chr11	35637516	35637518	.	FJX1
cg01485975	Up_In_A2	chr5	156486185	156486187	.	HAVCR1
cg01487694	Up_In_A2	chr8	100974616	100974618	.	RGS22	SNORD77
cg01493728	Up_In_A2	chr12	95557839	95557841	.	FGD6
cg01498641	Up_In_A2	chr16	85365442	85365444	.	LOC727710
cg01502428	Up_In_A2	chr17	76850265	76850267	.	TIMP2	USP36
cg01504030	Up_In_A2	chr6	38141878	38141880	.	BTBD9	AX747659
cg01512532	Up_In_A2	chr17	79495038	79495040	.	FSCN2
cg01514075	Up_In_A2	chr1	7832356	7832358	.	VAMP3
cg01518459	Up_In_A2	chr19	30199589	30199591	.	C19orf12
cg01520309	Up_In_A2	chr1	228079124	228079126	.	WNT9A
cg01520402	Up_In_A2	chr3	142790397	142790399	.	U2SURP
cg01522249	Up_In_A2	chrX	39951639	39951641	.	BCOR
cg01534808	Up_In_A2	chr11	128578725	128578727	.	FLI1	LOC100507392
cg01537713	Up_In_A2	chr3	142606817	142606819	.	PCOLCE2
cg01539849	Up_In_A2	chr11	47376753	47376755	.	SPI1	SLC39A13
cg01540102	Up_In_A2	chr16	57506037	57506039	.	DOK4
cg01543184	Up_In_A2	chr17	79881542	79881544	.	MAFG
cg01551258	Up_In_A2	chr17	30479186	30479188	.	ARGFXP2	RHOT1
cg01551699	Up_In_A2	chr7	141695710	141695712	.	MGAM
cg01554316	Up_In_A2	chr1	230257066	230257068	.	GALNT2
cg01556514	Up_In_A2	chr6	126083980	126083982	.	HEY2
cg01556552	Up_In_A2	chr1	10695685	10695687	.	CASZ1
cg01557549	Up_In_A2	chr3	53168664	53168666	.	RFT1
cg01562897	Up_In_A2	chr1	39339985	39339987	.	GJA9	MYCBP	RRAGC
cg01566312	Up_In_A2	chr1	97418098	97418100	.	PTBLP
cg01569440	Up_In_A2	chr17	46717146	46717148	.	MIR196A1
cg01569664	Up_In_A2	chr13	110434015	110434017	.	IRS2
cg01570265	Up_In_A2	chr14	70180750	70180752	.	KIAA0247	SRSF5
cg01572434	Up_In_A2	chr5	130219925	130219927	.	HINT1
cg01573306	Up_In_A2	chr1	172330399	172330401	.	DNM3
cg01574589	Up_In_A2	chr5	135532196	135532198	.	LOC389332
cg01576142	Up_In_A2	chr14	92297259	92297261	.	TC2N
cg01578442	Up_In_A2	chr5	124223910	124223912	.	ZNF608
cg01580568	Up_In_A2	chr1	209825855	209825857	.	LAMB3
cg01584389	Up_In_A2	chr6	32366416	32366418	.	BTNL2	HCG23
cg01608477	Up_In_A2	chr20	2852506	2852508	.	PTPRA
cg01609268	Up_In_A2	chr13	112236853	112236855	.	C13orf16
cg01612660	Up_In_A2	chr4	56211432	56211434	.	SRD5A3
cg01630691	Up_In_A2	chr2	203359166	203359168	.	BMPR2
cg01637482	Up_In_A2	chr16	1880435	1880437	.	FAHD1
cg01641368	Up_In_A2	chr2	240270999	240271001	.	HDAC4	MIR2467
cg01646718	Up_In_A2	chr8	145580726	145580728	.	GPR172A	FBXL6
cg01652190	Up_In_A2	chr22	50026170	50026172	.	C22orf34
cg01653532	Up_In_A2	chr17	57444077	57444079	.	YPEL2	MIR4729
cg01657186	Up_In_A2	chr12	679899	679901	.	NINJ2	B4GALNT3
cg01664325	Up_In_A2	chr6	135572023	135572025	.	MYB
cg01676795	Up_In_A2	chr7	75586347	75586349	.	POR
cg01684175	Up_In_A2	chr13	41185352	41185354	.	FOXO1
cg01687402	Up_In_A2	chr17	48620660	48620662	.	EPN3	SPATA20
cg01697794	Up_In_A2	chr17	7117124	7117126	.	DLG4	ACADVL
cg01700683	Up_In_A2	chr15	63510941	63510943	.	RAB8B
cg01703291	Up_In_A2	chr15	85574660	85574662	.	PDE8A
cg01704198	Up_In_A2	chr3	33757892	33757894	.	CLASP2
cg01706566	Up_In_A2	chr8	26239921	26239923	.	BNIP3L	BC034827
cg01709766	Up_In_A2	chr11	5640317	5640319	.	TRIM6-TRIM34	TRIM34
cg01710607	Up_In_A2	chr3	115417877	115417879	.	GAP43
cg01715680	Up_In_A2	chr14	93725376	93725378	.	BTBD7
cg01722861	Up_In_A2	chr11	16945422	16945424	.	PLEKHA7
cg01727105	Up_In_A2	chr2	85596696	85596698	.	ELMOD3
cg01744412	Up_In_A2	chr13	34736498	34736500	.	U5
cg01746550	Up_In_A2	chr2	60543790	60543792	.	MIR4432
cg01757116	Up_In_A2	chr13	34118016	34118018	.	STARD13
cg01760027	Up_In_A2	chrX	49832256	49832258	.	CLCN5
cg01761758	Up_In_A2	chr17	76850276	76850278	.	TIMP2	USP36
cg01762581	Up_In_A2	chr8	42234613	42234615	.	DKK4
cg01766743	Up_In_A2	chr12	24608518	24608520	.	SOX5
cg01767053	Up_In_A2	chr16	85678883	85678885	.	KIAA0182
cg01768446	Up_In_A2	chr16	89982418	89982420	.	MC1R
cg01768926	Up_In_A2	chr18	32820084	32820086	.	ZNF397
cg01771850	Up_In_A2	chr17	80847136	80847138	.	TBCD
cg01792430	Up_In_A2	chr2	29388413	29388415	.	CLIP4
cg01792876	Up_In_A2	chr8	116684800	116684802	.	TRPS1
cg01803859	Up_In_A2	chr8	95221341	95221343	.	CDH17
cg01807026	Up_In_A2	chr9	123475366	123475368	.	MEGF9
cg01807748	Up_In_A2	chr1	94534644	94534646	.	ABCA4
cg01808708	Up_In_A2	chr1	183484104	183484106	.	SMG7
cg01809941	Up_In_A2	chr5	14581403	14581405	.	FAM105A
cg01815783	Up_In_A2	chr4	1047042	1047044	.	AK124578
cg01819912	Up_In_A2	chr1	235572022	235572024	.	TBCE
cg01823853	Up_In_A2	chr7	27646143	27646145	.	HIBADH	TSL-A
cg01824095	Up_In_A2	chrX	40481858	40481860	.	LOC347411
cg01824625	Up_In_A2	chr3	89229762	89229764	.	EPHA3
cg01833755	Up_In_A2	chr14	89889371	89889373	.	FOXN3	LOC400236
cg01835489	Up_In_A2	chr12	53299309	53299311	.	KRT8
cg01836096	Up_In_A2	chr8	145578602	145578604	.	C8ORFK29
cg01843999	Up_In_A2	chr5	137438731	137438733	.	WNT8A
cg01847441	Up_In_A2	chr14	69431072	69431074	.	ACTN1
cg01861509	Up_In_A2	chr10	73849625	73849627	.	SPOCK2
cg01861613	Up_In_A2	chr6	13927647	13927649	.	RNF182
cg01866022	Up_In_A2	chr22	29199246	29199248	.	XBP1
cg01868729	Up_In_A2	chr12	83251283	83251285	.	TMTC2	U6
cg01871631	Up_In_A2	chr8	129807057	129807059	.	BC014119
cg01876288	Up_In_A2	chr7	158800933	158800935	.	LOC154822
cg01876548	Up_In_A2	chr5	124126862	124126864	.	ZNF608
cg01878308	Up_In_A2	chr2	86719501	86719503	.	KDM3A
cg01879723	Up_In_A2	chr3	141119261	141119263	.	ZBTB38
cg01881971	Up_In_A2	chr5	167181456	167181458	.	ODZ2
cg01886125	Up_In_A2	chr2	110054029	110054031	.	SH3RF3	MIR4266
cg01886855	Up_In_A2	chr21	43786996	43786998	.	TFF1
cg01888601	Up_In_A2	chr11	47736181	47736183	.	AGBL2
cg01894366	Up_In_A2	chr3	107700615	107700617	.	LOC285205
cg01895333	Up_In_A2	chr3	109035404	109035406	.	DPPA2
cg01910741	Up_In_A2	chr6	36843332	36843334	.	PPIL1
cg01912119	Up_In_A2	chr5	90471711	90471713	.	AK091866
cg01916237	Up_In_A2	chr4	1558882	1558884	.	AX748388
cg01919941	Up_In_A2	chr12	58934470	58934472	.	AK093124
cg01922485	Up_In_A2	chr1	942695	942697	.	ISG15
cg01927373	Up_In_A2	chr4	82407883	82407885	.	RASGEF1B
cg01928231	Up_In_A2	chr6	3502697	3502699	.	SLC22A23
cg01928411	Up_In_A2	chr12	50793980	50793982	.	LARP4
cg01936839	Up_In_A2	chr7	27198895	27198897	.	HOXA7
cg01942797	Up_In_A2	chr7	156407144	156407146	.	BC070228
cg01954585	Up_In_A2	chr15	86270434	86270436	.	AKAP13	KLHL25
cg01963702	Up_In_A2	chr11	12188995	12188997	.	MICAL2
cg01970407	Up_In_A2	chr5	323319	323321	.	AHRR
cg01971181	Up_In_A2	chr3	158518887	158518889	.	MFSD1
cg01972979	Up_In_A2	chrX	133680445	133680447	.	MGC16121	MIR503
cg01976810	Up_In_A2	chr17	751708	751710	.	NXN
cg01977473	Up_In_A2	chr5	125800915	125800917	.	GRAMD3
cg01983105	Up_In_A2	chr4	103421223	103421225	.	NFKB1
cg01983454	Up_In_A2	chr19	4174164	4174166	.	SIRT6
cg01986648	Up_In_A2	chr6	64226340	64226342	.	PTP4A1
cg01987516	Up_In_A2	chr10	101282725	101282727	.	chromosome 10 open reading frame 139
cg01988285	Up_In_A2	chr3	50306106	50306108	.	SEMA3B
cg01992464	Up_In_A2	chr16	89913767	89913769	.	SPIRE2
cg01999051	Up_In_A2	chr6	166797737	166797739	.	BRP44L
cg02001060	Up_In_A2	chr11	108408961	108408963	.	EXPH5
cg02002207	Up_In_A2	chr16	89913617	89913619	.	SPIRE2
cg02006107	Up_In_A2	chr8	80943346	80943348	.	MRPS28
cg02007434	Up_In_A2	chr10	98210803	98210805	.	TLL2
cg02010763	Up_In_A2	chr15	61044828	61044830	.	RORA	5S_rRNA
cg02012242	Up_In_A2	chr16	89575946	89575948	.	SPG7
cg02012338	Up_In_A2	chr4	187126138	187126140	.	CYP4V2
cg02013148	Up_In_A2	chr3	149238477	149238479	.	WWTR1	U6
cg02013841	Up_In_A2	chr13	49159766	49159768	.	RCBTB2
cg02015823	Up_In_A2	chr16	50584988	50584990	.	NKD1
cg02022375	Up_In_A2	chr17	39197720	39197722	.	KRTAP1-1
cg02023138	Up_In_A2	chr12	51701978	51701980	.	BIN2
cg02023912	Up_In_A2	chr6	71126014	71126016	.	FAM135A
cg02034222	Up_In_A2	chr2	74753280	74753282	.	DQX1
cg02044879	Up_In_A2	chr10	74714934	74714936	.	PLA2G12B
cg02050376	Up_In_A2	chr13	109984683	109984685	.	MYO16
cg02052531	Up_In_A2	chr5	81692894	81692896	.	BC132949
cg02054513	Up_In_A2	chr16	80319281	80319283	.	DYNLRB2
cg02055988	Up_In_A2	chr22	31671701	31671703	.	LIMK2	PIK3IP1
cg02057688	Up_In_A2	chr6	2697757	2697759	.	MYLK4
cg02059509	Up_In_A2	chr10	30405143	30405145	.	KIAA1462
cg02060732	Up_In_A2	chr17	77151205	77151207	.	HRNBP3	ENGASE
cg02068015	Up_In_A2	chr22	17848580	17848582	.	CECR2
cg02069524	Up_In_A2	chr10	1234331	1234333	.	ADARB2
cg02070290	Up_In_A2	chr17	68071396	68071398	.	KCNJ16
cg02073465	Up_In_A2	chr15	59904008	59904010	.	GCNT3
cg02078558	Up_In_A2	chr2	179058156	179058158	.	OSBPL6
cg02081065	Up_In_A2	chr5	132209138	132209140	.	LEAP2
cg02086457	Up_In_A2	chr16	87702534	87702536	.	JPH3	FLJ00104
cg02089014	Up_In_A2	chr2	925837	925839	.	SNTG2
cg02092790	Up_In_A2	chr17	39094799	39094801	.	KRT23
cg02095290	Up_In_A2	chr11	17008894	17008896	.	PLEKHA7
cg02098075	Up_In_A2	chr8	49643971	49643973	.	EFCAB1
cg02107173	Up_In_A2	chr1	89756029	89756031	.	GBP5
cg02117489	Up_In_A2	chr6	167284461	167284463	.	RPS6KA2
cg02119938	Up_In_A2	chr15	78505050	78505052	.	ACSBG1
cg02120470	Up_In_A2	chr1	67267128	67267130	.	INSL5
cg02124524	Up_In_A2	chr16	85655006	85655008	.	KIAA0182
cg02140072	Up_In_A2	chr10	22536730	22536732	.	LOC100130992
cg02144874	Up_In_A2	chr2	239047335	239047337	.	KLHL30
cg02152417	Up_In_A2	chr1	7326344	7326346	.	CAMTA1
cg02152631	Up_In_A2	chr8	29133646	29133648	.	KIF13B
cg02153208	Up_In_A2	chr15	57589159	57589161	.	LOC283663
cg02154084	Up_In_A2	chr5	146184363	146184365	.	PPP2R2B
cg02165670	Up_In_A2	chr13	94764646	94764648	.	GPC6	5S_rRNA
cg02166981	Up_In_A2	chr1	215178906	215178908	.	KCNK2
cg02172216	Up_In_A2	chr10	131514247	131514249	.	MGMT	MIR4297
cg02176725	Up_In_A2	chr11	45824651	45824653	.	SLC35C1
cg02179764	Up_In_A2	chr22	37419794	37419796	.	MPST
cg02185402	Up_In_A2	chr20	400360	400362	.	RBCK1
cg02192520	Up_In_A2	chr12	56114154	56114156	.	RDH5
cg02200642	Up_In_A2	chr11	7871039	7871041	.	OR5E1P
cg02210498	Up_In_A2	chr22	21275400	21275402	.	CRKL
cg02214783	Up_In_A2	chr1	3688256	3688258	.	LOC388588
cg02216731	Up_In_A2	chr16	801935	801937	.	MSLN
cg02224329	Up_In_A2	chr2	185740589	185740591	.	ZNF804A
cg02225786	Up_In_A2	chr2	224808251	224808253	.	WDFY1
cg02227036	Up_In_A2	chr16	50425328	50425330	.	BRD7
cg02228185	Up_In_A2	chr17	3379566	3379568	.	ASPA
cg02229288	Up_In_A2	chr10	1156175	1156177	.	WDR37	AX748285
cg02237755	Up_In_A2	chr10	102107924	102107926	.	SCD
cg02245875	Up_In_A2	chr20	17552880	17552882	.	DSTN
cg02248763	Up_In_A2	chr11	1580097	1580099	.	HCCA2	DUSP8
cg02249893	Up_In_A2	chr5	10150207	10150209	.	FAM173B
cg02254879	Up_In_A2	chr16	50069453	50069455	.	TMEM188
cg02257172	Up_In_A2	chr10	13380769	13380771	.	SEPHS1
cg02260630	Up_In_A2	chr16	75491893	75491895	.	TMEM170A
cg02279082	Up_In_A2	chr2	236417589	236417591	.	AGAP1
cg02281505	Up_In_A2	chr1	68508526	68508528	.	DIRAS3
cg02285155	Up_In_A2	chr10	21653472	21653474	.	MIR1915
cg02288969	Up_In_A2	chr1	172413491	172413493	.	PIGC	C1orf105
cg02297541	Up_In_A2	chr6	33180840	33180842	.	RING1
cg02308226	Up_In_A2	chr2	99956838	99956840	.	EIF5B	TXNDC9
cg02310027	Up_In_A2	chr17	77704740	77704742	.	ENPP7
cg02317313	Up_In_A2	chr12	122235205	122235207	.	LOC338799	AK095700
cg02329038	Up_In_A2	chr17	46710000	46710002	.	MIR196A1
cg02330271	Up_In_A2	chr19	4835715	4835717	.	TICAM1
cg02339793	Up_In_A2	chr17	79225572	79225574	.	SLC38A10
cg02346342	Up_In_A2	chr8	74332434	74332436	.	LOC100128126
cg02347573	Up_In_A2	chr10	13931591	13931593	.	FRMD4A
cg02351840	Up_In_A2	chr13	112559706	112559708	.	SOX1
cg02358382	Up_In_A2	chr7	158056847	158056849	.	PTPRN2	DQ583756
cg02359506	Up_In_A2	chr4	41270334	41270336	.	UCHL1
cg02360367	Up_In_A2	chr1	2180026	2180028	.	SKI
cg02361027	Up_In_A2	chr2	170217400	170217402	.	LRP2
cg02362978	Up_In_A2	chr17	9550136	9550138	.	USP43
cg02363593	Up_In_A2	chr5	169123191	169123193	.	DOCK2
cg02364826	Up_In_A2	chr5	114878737	114878739	.	FEM1C
cg02372744	Up_In_A2	chr5	171050889	171050891	.	FGF18
cg02372856	Up_In_A2	chr8	49340973	49340975	.	EFCAB1
cg02388718	Up_In_A2	chr9	27282579	27282581	.	NCRNA00032	LINC00032
cg02389084	Up_In_A2	chr7	26403253	26403255	.	SNX10
cg02399455	Up_In_A2	chr7	87855713	87855715	.	SRI
cg02403283	Up_In_A2	chr10	518209	518211	.	DIP2C
cg02413187	Up_In_A2	chr19	1356268	1356270	.	MUM1
cg02419362	Up_In_A2	chr12	121203947	121203949	.	SPPL3
cg02424103	Up_In_A2	chr3	156892028	156892030	.	CCNL1
cg02426414	Up_In_A2	chr17	18265932	18265934	.	SHMT1
cg02432003	Up_In_A2	chr16	89311343	89311345	.	DQ583205
cg02435345	Up_In_A2	chr17	14749785	14749787	.	CDRT7
cg02436602	Up_In_A2	chr6	26246269	26246271	.	HIST1H4G
cg02441474	Up_In_A2	chr16	89165299	89165301	.	ACSF3
cg02441982	Up_In_A2	chr17	76183640	76183642	.	AFMID	TK1
cg02444226	Up_In_A2	chr2	66545287	66545289	.	MIR4778
cg02447879	Up_In_A2	chr17	79393681	79393683	.	BAHCC1
cg02449202	Up_In_A2	chr6	46761070	46761072	.	MEP1A
cg02460314	Up_In_A2	chr10	101841284	101841286	.	CPN1
cg02462868	Up_In_A2	chr17	46712051	46712053	.	MIR196A1
cg02470587	Up_In_A2	chr12	48302190	48302192	.	VDR
cg02478828	Up_In_A2	chr2	74153194	74153196	.	DGUOK
cg02484127	Up_In_A2	chr3	128723004	128723006	.	CCDC48
cg02484307	Up_In_A2	chr7	28270124	28270126	.	JAZF1
cg02486855	Up_In_A2	chr15	67356941	67356943	.	SMAD3
cg02487061	Up_In_A2	chr1	85721249	85721251	.	C1orf52
cg02488702	Up_In_A2	chr2	142889391	142889393	.	LRP1B
cg02491003	Up_In_A2	chr3	57581392	57581394	.	ARF4
cg02495767	Up_In_A2	chr7	1030998	1031000	.	CYP2W1
cg02496223	Up_In_A2	chr17	10708229	10708231	.	LOC100289255
cg02498063	Up_In_A2	chr12	119772576	119772578	.	CCDC60
cg02498579	Up_In_A2	chr7	99292360	99292362	.	CYP3A5
cg02504622	Up_In_A2	chr3	150238256	150238258	.	EIF2A
cg02505918	Up_In_A2	chr17	8791859	8791861	.	PIK3R5	PIK3R6
cg02505956	Up_In_A2	chr7	157348265	157348267	.	PTPRN2	MIR153-2
cg02518338	Up_In_A2	chr17	47929556	47929558	.	TAC4
cg02520804	Up_In_A2	chr3	71629053	71629055	.	FOXP1
cg02524112	Up_In_A2	chr16	73206623	73206625	.	HTA
cg02530753	Up_In_A2	chr17	65955866	65955868	.	BPTF
cg02538681	Up_In_A2	chr10	90611910	90611912	.	ANKRD22
cg02540781	Up_In_A2	chr5	850744	850746	.	ZDHHC11
cg02546477	Up_In_A2	chr12	15082051	15082053	.	ERP27
cg02552189	Up_In_A2	chr2	223891283	223891285	.	KCNE4
cg02560744	Up_In_A2	chr2	110872728	110872730	.	MALL
cg02562761	Up_In_A2	chr16	4307905	4307907	.	TFAP4	LOC100507501
cg02565842	Up_In_A2	chr3	184278267	184278269	.	EPHB3
cg02571055	Up_In_A2	chr6	158896789	158896791	.	TULP4	TMEM181
cg02572796	Up_In_A2	chr4	186732123	186732125	.	SORBS2
cg02584678	Up_In_A2	chr19	15310519	15310521	.	NOTCH3
cg02587392	Up_In_A2	chr1	3354411	3354413	.	PRDM16	ARHGEF16
cg02596499	Up_In_A2	chr7	130724682	130724684	.	FLJ43663
cg02597644	Up_In_A2	chr11	1898969	1898971	.	LSP1
cg02607810	Up_In_A2	chr7	84671581	84671583	.	SEMA3D
cg02611282	Up_In_A2	chr7	28338984	28338986	.	CREB5
cg02615833	Up_In_A2	chr5	175976341	175976343	.	PCDH24	CDHR2
cg02620403	Up_In_A2	chr5	110404836	110404838	.	TSLP
cg02622647	Up_In_A2	chr17	43578910	43578912	.	AF119889
cg02632490	Up_In_A2	chr10	88024528	88024530	.	GRID1	MIR346
cg02633817	Up_In_A2	chr19	35606731	35606733	.	FXYD3
cg02635370	Up_In_A2	chr11	14037437	14037439	.	SPON1
cg02638909	Up_In_A2	chr8	30888800	30888802	.	PURG
cg02639435	Up_In_A2	chr10	13534678	13534680	.	BEND7
cg02643433	Up_In_A2	chr6	7544196	7544198	.	DSP
cg02647265	Up_In_A2	chr12	124456163	124456165	.	CCDC92
cg02658330	Up_In_A2	chr3	58653592	58653594	.	FAM3D
cg02661728	Up_In_A2	chr7	17018325	17018327	.	AGR3
cg02668218	Up_In_A2	chr20	2191728	2191730	.	TGM3
cg02671171	Up_In_A2	chr17	203086	203088	.	RPH3AL
cg02677198	Up_In_A2	chr20	4670930	4670932	.	PRNP
cg02686793	Up_In_A2	chr6	112340332	112340334	.	WISP3
cg02698576	Up_In_A2	chr1	151104749	151104751	.	SEMA6C
cg02699099	Up_In_A2	chr1	108745420	108745422	.	SLC25A24
cg02709052	Up_In_A2	chr11	86748070	86748072	.	TMEM135
cg02710090	Up_In_A2	chr1	207225127	207225129	.	PFKFB2	YOD1
cg02711128	Up_In_A2	chr19	18318949	18318951	.	PDE4C	RAB3A
cg02711929	Up_In_A2	chr10	124220395	124220397	.	HTRA1
cg02713162	Up_In_A2	chr5	141702372	141702374	.	SPRY4
cg02715913	Up_In_A2	chr4	6324193	6324195	.	PPP2R2C	WFS1
cg02717117	Up_In_A2	chr2	55458693	55458695	.	C2orf63	RPS27A
cg02726898	Up_In_A2	chr16	1146544	1146546	.	C1QTNF8
cg02727737	Up_In_A2	chr6	139015287	139015289	.	FLJ46906
cg02729383	Up_In_A2	chr7	130625472	130625474	.	LOC646329
cg02730008	Up_In_A2	chrY	15814319	15814321	.	TMSB4Y
cg02734001	Up_In_A2	chr15	57551708	57551710	.	TCF12
cg02736228	Up_In_A2	chr1	204346642	204346644	.	LOC127841
cg02743342	Up_In_A2	chr5	126984563	126984565	.	CTXN3
cg02747210	Up_In_A2	chr13	113776916	113776918	.	F10
cg02760280	Up_In_A2	chr1	21993554	21993556	.	RAP1GAP
cg02761110	Up_In_A2	chr3	65887858	65887860	.	MAGI1
cg02762634	Up_In_A2	chr17	26458795	26458797	.	NLK
cg02778678	Up_In_A2	chr20	62037502	62037504	.	KCNQ2
cg02785561	Up_In_A2	chr8	10262220	10262222	.	MSRA	PRSS55
cg02789316	Up_In_A2	chr9	95568713	95568715	.	ANKRD19P
cg02792168	Up_In_A2	chr10	101281923	101281925	.	chromosome 10 open reading frame 139
cg02799880	Up_In_A2	chr13	99630461	99630463	.	DOCK9
cg02800711	Up_In_A2	chr11	17564424	17564426	.	USH1C
cg02812487	Up_In_A2	chr12	125577624	125577626	.	AACS
cg02821871	Up_In_A2	chr19	49133597	49133599	.	SPHK2
cg02825630	Up_In_A2	chr3	59646859	59646861	.	NPCR
cg02830202	Up_In_A2	chr16	86953382	86953384	.	BC041439
cg02852959	Up_In_A2	chr12	2944435	2944437	.	NRIP2
cg02857726	Up_In_A2	chr3	149088387	149088389	.	TM4SF1
cg02864248	Up_In_A2	chr15	91411837	91411839	.	FURIN
cg02864638	Up_In_A2	chr17	20840715	20840717	.	BC072410
cg02865675	Up_In_A2	chr6	168479648	168479650	.	FRMD1
cg02876221	Up_In_A2	chr4	134545512	134545514	.	BC042378
cg02892357	Up_In_A2	chr21	45789378	45789380	.	TRPM2
cg02895699	Up_In_A2	chr4	7813790	7813792	.	AFAP1	AFAP1-AS1
cg02896515	Up_In_A2	chr1	46645967	46645969	.	TSPAN1	PIK3R3
cg02899870	Up_In_A2	chr20	32263103	32263105	.	NECAB3
cg02903680	Up_In_A2	chr15	85526197	85526199	.	PDE8A
cg02904918	Up_In_A2	chr19	45033942	45033944	.	CEACAM20
cg02909890	Up_In_A2	chr6	105607394	105607396	.	POPDC3
cg02914047	Up_In_A2	chrX	105935884	105935886	.	RNF128
cg02914652	Up_In_A2	chr12	4417141	4417143	.	C12orf5
cg02936493	Up_In_A2	chr7	73223934	73223936	.	hCPE-R
cg02937055	Up_In_A2	chr3	171489624	171489626	.	PLD1
cg02937491	Up_In_A2	chr18	55888789	55888791	.	NEDD4L
cg02939781	Up_In_A2	chr3	183208856	183208858	.	KLHL6
cg02957185	Up_In_A2	chr1	161068780	161068782	.	KLHDC9
cg02959688	Up_In_A2	chr6	36283928	36283930	.	C6orf222
cg02959725	Up_In_A2	chr3	148664700	148664702	.	GYG1
cg02960488	Up_In_A2	chr3	178863506	178863508	.	BC032034
cg02961798	Up_In_A2	chr16	67687391	67687393	.	RLTPR	DL491203
cg02962647	Up_In_A2	chr6	158655003	158655005	.	GTF2H5
cg02964087	Up_In_A2	chr16	51910166	51910168	.	LOC388276
cg02965295	Up_In_A2	chr2	197944717	197944719	.	ANKRD44
cg02965411	Up_In_A2	chr12	71551925	71551927	.	TSPAN8
cg02971920	Up_In_A2	chr1	1095606	1095608	.	MIR200B
cg02976355	Up_In_A2	chr9	14312434	14312436	.	NFIB
cg02977388	Up_In_A2	chr10	90253614	90253616	.	RNLS
cg02980235	Up_In_A2	chr16	72258236	72258238	.	PMFBP1
cg02981092	Up_In_A2	chr3	57543498	57543500	.	PDE12
cg02981663	Up_In_A2	chr13	28232082	28232084	.	POLR1D
cg02986315	Up_In_A2	chr13	53059213	53059215	.	TPTE2P3
cg02987906	Up_In_A2	chr4	54243302	54243304	.	FIP1L1	PDGFRA
cg02989080	Up_In_A2	chr7	27385178	27385180	.	BC034444
cg02998129	Up_In_A2	chr17	42344233	42344235	.	SLC4A1
cg03003746	Up_In_A2	chr1	1102832	1102834	.	MIR200A	MIR200B
cg03013917	Up_In_A2	chr10	77021866	77021868	.	COMTD1
cg03014589	Up_In_A2	chr8	144965835	144965837	.	EPPK1
cg03016571	Up_In_A2	chr17	48844123	48844125	.	C17orf73
cg03020424	Up_In_A2	chr3	148581800	148581802	.	CPA3
cg03037974	Up_In_A2	chr15	76606531	76606533	.	ETFA
cg03044533	Up_In_A2	chr11	96065843	96065845	.	MAML2	MIR1260B
cg03044684	Up_In_A2	chr21	33248031	33248033	.	HUNK
cg03048947	Up_In_A2	chr1	225611365	225611367	.	LBR
cg03052078	Up_In_A2	chr6	147527112	147527114	.	STXBP5
cg03055271	Up_In_A2	chr1	189744004	189744006	.	FAM5C
cg03056854	Up_In_A2	chr1	20005413	20005415	.	HTR6
cg03062717	Up_In_A2	chr19	35940482	35940484	.	FFAR2
cg03063015	Up_In_A2	chr6	96634352	96634354	.	FUT9
cg03085312	Up_In_A2	chr17	38465280	38465282	.	RARA
cg03089870	Up_In_A2	chr6	17988959	17988961	.	KIF13A
cg03090436	Up_In_A2	chr6	71121858	71121860	.	FAM135A
cg03096803	Up_In_A2	chr17	74641293	74641295	.	ST6GALNAC1
cg03097389	Up_In_A2	chr13	45008446	45008448	.	TSC22D1
cg03100752	Up_In_A2	chr19	12847401	12847403	.	ASNA1
cg03106852	Up_In_A2	chr6	112555545	112555547	.	LAMA4
cg03109921	Up_In_A2	chr17	40820188	40820190	.	PLEKHH3
cg03110165	Up_In_A2	chr13	93884311	93884313	.	GPC6
cg03116409	Up_In_A2	chr12	66042553	66042555	.	BC043551
cg03118430	Up_In_A2	chr11	2482232	2482234	.	KCNQ1
cg03127388	Up_In_A2	chr1	204195148	204195150	.	PLEKHA6	AX747554
cg03130276	Up_In_A2	chr17	78161481	78161483	.	CARD14
cg03134230	Up_In_A2	chr2	192208954	192208956	.	MYO1B
cg03138560	Up_In_A2	chr1	197030121	197030123	.	F13B
cg03138970	Up_In_A2	chr5	177539697	177539699	.	N4BP3
cg03143457	Up_In_A2	chr1	68214820	68214822	.	GNG12	U7
cg03144839	Up_In_A2	chr3	101832644	101832646	.	ZPLD1
cg03145994	Up_In_A2	chr20	60528915	60528917	.	MIR1257
cg03146155	Up_In_A2	chr6	134588827	134588829	.	SGK1
cg03149320	Up_In_A2	chr8	124255886	124255888	.	C8orf76
cg03151529	Up_In_A2	chr12	124248925	124248927	.	DNAH10
cg03163246	Up_In_A2	chr4	74921022	74921024	.	PPBPL2
cg03168029	Up_In_A2	chr11	1221397	1221399	.	MUC5AC
cg03173942	Up_In_A2	chr3	72435596	72435598	.	RYBP
cg03176203	Up_In_A2	chr16	14580862	14580864	.	PARN
cg03176996	Up_In_A2	chr5	95296095	95296097	.	ELL2
cg03187073	Up_In_A2	chr6	4890078	4890080	.	CDYL
cg03187190	Up_In_A2	chr13	28356574	28356576	.	GSX1
cg03190219	Up_In_A2	chr7	25898687	25898689	.	MIR148A
cg03198203	Up_In_A2	chr11	17034483	17034485	.	PLEKHA7
cg03202693	Up_In_A2	chr13	113637902	113637904	.	MCF2L
cg03207593	Up_In_A2	chr13	112695110	112695112	.	SOX1
cg03208983	Up_In_A2	chr12	10767010	10767012	.	MAGOHB
cg03217954	Up_In_A2	chr2	44502976	44502978	.	SLC3A1
cg03231860	Up_In_A2	chr11	128893939	128893941	.	RICS	ARHGAP32
cg03233490	Up_In_A2	chr17	59018421	59018423	.	BCAS3
cg03238075	Up_In_A2	chr17	21113362	21113364	.	TMEM11
cg03238162	Up_In_A2	chr18	29027700	29027702	.	DSG3
cg03240059	Up_In_A2	chr12	52430399	52430401	.	NR4A1
cg03241461	Up_In_A2	chr10	29924257	29924259	.	SVIL
cg03255379	Up_In_A2	chr2	85531469	85531471	.	TCF7L1	TGOLN2
cg03261347	Up_In_A2	chr6	151905595	151905597	.	C6orf97	U6
cg03268697	Up_In_A2	chr17	75160329	75160331	.	SEC14L1
cg03269757	Up_In_A2	chr2	38602133	38602135	.	ATL2
cg03272326	Up_In_A2	chr1	166136938	166136940	.	FAM78B
cg03284113	Up_In_A2	chr19	1235092	1235094	.	C19orf26
cg03286735	Up_In_A2	chr4	906490	906492	.	GAK
cg03287046	Up_In_A2	chr7	29519322	29519324	.	CHN2
cg03287469	Up_In_A2	chr3	9006241	9006243	.	RAD18
cg03290213	Up_In_A2	chr17	78152231	78152233	.	CARD14
cg03296575	Up_In_A2	chr16	3211655	3211657	.	TRNA_Pro
cg03298700	Up_In_A2	chr2	220295752	220295754	.	SPEG
cg03298704	Up_In_A2	chr4	99427936	99427938	.	TSPAN5
cg03301165	Up_In_A2	chr16	19712045	19712047	.	C16orf62	IQCK
cg03305853	Up_In_A2	chr13	111525468	111525470	.	LINC00346
cg03314013	Up_In_A2	chr15	60394016	60394018	.	FOXB1
cg03318906	Up_In_A2	chr8	37755253	37755255	.	RAB11FIP1
cg03321349	Up_In_A2	chr2	125239713	125239715	.	CNTNAP5
cg03322234	Up_In_A2	chr7	1022642	1022644	.	CYP2W1
cg03322979	Up_In_A2	chr12	116922291	116922293	.	LINC00173
cg03332897	Up_In_A2	chr19	740441	740443	.	PALM	C19orf21
cg03333188	Up_In_A2	chr16	49496732	49496734	.	C16orf78
cg03338924	Up_In_A2	chr6	13015105	13015107	.	PHACTR1	LOC100130357
cg03340964	Up_In_A2	chr20	17552528	17552530	.	DSTN
cg03352173	Up_In_A2	chr3	112013129	112013131	.	SLC9A10
cg03354616	Up_In_A2	chr6	80838250	80838252	.	BCKDHB
cg03361776	Up_In_A2	chr13	24001966	24001968	.	SACS
cg03371275	Up_In_A2	chr11	95974542	95974544	.	MAML2	MIR1260B
cg03372205	Up_In_A2	chr2	119619764	119619766	.	EN1
cg03373887	Up_In_A2	chr22	44389423	44389425	.	SAMM50	AX747952
cg03387497	Up_In_A2	chr20	17680944	17680946	.	BANF2
cg03387585	Up_In_A2	chr11	126455595	126455597	.	KIRREL3	DJ031150
cg03393769	Up_In_A2	chr2	54611905	54611907	.	C2orf73
cg03396285	Up_In_A2	chr2	101868355	101868357	.	C2orf29
cg03409151	Up_In_A2	chr5	125929670	125929672	.	ALDH7A1
cg03415649	Up_In_A2	chr9	99178662	99178664	.	ZNF367
cg03417473	Up_In_A2	chr1	113216381	113216383	.	MOV10
cg03417788	Up_In_A2	chr3	14605869	14605871	.	GRIP2
cg03420013	Up_In_A2	chr1	221213051	221213053	.	HLX
cg03420580	Up_In_A2	chr3	30730225	30730227	.	TGFBR2
cg03426602	Up_In_A2	chr2	227312416	227312418	.	BC017935
cg03446062	Up_In_A2	chr6	14477352	14477354	.	CD83
cg03449125	Up_In_A2	chr11	76779063	76779065	.	CAPN5
cg03453638	Up_In_A2	chr8	21646661	21646663	.	GFRA2
cg03454705	Up_In_A2	chr17	80535427	80535429	.	FOXK2
cg03457984	Up_In_A2	chr2	74227099	74227101	.	5S_rRNA
cg03461641	Up_In_A2	chr4	26454189	26454191	.	CCKAR
cg03464366	Up_In_A2	chr2	106227785	106227787	.	LOC285000
cg03466007	Up_In_A2	chr16	71716384	71716386	.	PHLPP2
cg03470159	Up_In_A2	chr8	10261797	10261799	.	MSRA	PRSS55
cg03476109	Up_In_A2	chr2	27408526	27408528	.	SLC5A6
cg03483654	Up_In_A2	chr11	61102073	61102075	.	DDB1	DAK
cg03485608	Up_In_A2	chr2	139535784	139535786	.	NXPH2
cg03487276	Up_In_A2	chr16	68563105	68563107	.	ZFP90
cg03494429	Up_In_A2	chr12	4417092	4417094	.	C12orf5
cg03495498	Up_In_A2	chr14	97878345	97878347	.	BC038465
cg03499943	Up_In_A2	chr10	126211703	126211705	.	LHPP
cg03501539	Up_In_A2	chr11	114760597	114760599	.	FAM55B
cg03507262	Up_In_A2	chr14	95784786	95784788	.	CLMN
cg03514381	Up_In_A2	chr6	99842367	99842369	.	COQ3
cg03517918	Up_In_A2	chr1	19946397	19946399	.	C1orf151	MGC87895
cg03520879	Up_In_A2	chr1	1062792	1062794	.	LOC254099
cg03522150	Up_In_A2	chr11	46969672	46969674	.	C11orf49
cg03530983	Up_In_A2	chr6	32781170	32781172	.	HLA-DOB
cg03532673	Up_In_A2	chr7	102787745	102787747	.	NAPEPLD
cg03534504	Up_In_A2	chr5	171594997	171594999	.	STK10
cg03535099	Up_In_A2	chr17	80847269	80847271	.	TBCD
cg03542197	Up_In_A2	chr7	83146544	83146546	.	SEMA3E
cg03547078	Up_In_A2	chr1	1855302	1855304	.	C1orf222
cg03560416	Up_In_A2	chr13	28025756	28025758	.	MTIF3
cg03564338	Up_In_A2	chr16	50585383	50585385	.	NKD1
cg03564727	Up_In_A2	chr19	49577205	49577207	.	KCNA7
cg03577128	Up_In_A2	chr3	148050623	148050625	.	TRNA_Leu
cg03577139	Up_In_A2	chr4	24796987	24796989	.	SOD3
cg03583311	Up_In_A2	chr1	9187975	9187977	.	GPR157
cg03594790	Up_In_A2	chr5	125706442	125706444	.	GRAMD3
cg03601836	Up_In_A2	chr3	190037694	190037696	.	CLDN1
cg03605365	Up_In_A2	chr1	62207324	62207326	.	INADL
cg03615849	Up_In_A2	chr1	233390248	233390250	.	PCNXL2
cg03623599	Up_In_A2	chr13	39358794	39358796	.	FREM2
cg03624899	Up_In_A2	chr16	18802160	18802162	.	RPS15A
cg03628000	Up_In_A2	chr16	14596061	14596063	.	PARN
cg03649855	Up_In_A2	chr6	45576387	45576389	.	RUNX2
cg03652564	Up_In_A2	chr1	164619764	164619766	.	PBX1	AX748175
cg03655174	Up_In_A2	chr8	30505289	30505291	.	GTF2E2	LOC100507341
cg03656863	Up_In_A2	chr8	67467991	67467993	.	C8orf46
cg03660010	Up_In_A2	chr4	48342262	48342264	.	SLAIN2
cg03661817	Up_In_A2	chr16	57831744	57831746	.	KIFC3
cg03662545	Up_In_A2	chr16	85254208	85254210	.	LINC00311
cg03665360	Up_In_A2	chr12	54052858	54052860	.	ATP5G2
cg03667819	Up_In_A2	chr7	28892205	28892207	.	TRIL
cg03668763	Up_In_A2	chr11	9549285	9549287	.	ZNF143	DM376719
cg03670908	Up_In_A2	chr3	40966964	40966966	.	CTNNB1
cg03673298	Up_In_A2	chr6	31623179	31623181	.	APOM
cg03676624	Up_In_A2	chr11	77313685	77313687	.	AQP11
cg03676636	Up_In_A2	chr4	99064101	99064103	.	C4orf37
cg03679504	Up_In_A2	chr3	46621555	46621557	.	TDGF1	LRRC2
cg03685774	Up_In_A2	chr1	159870325	159870327	.	CCDC19
cg03687070	Up_In_A2	chr2	16210107	16210109	.	MYCN
cg03693099	Up_In_A2	chr9	135936900	135936902	.	CEL
cg03701623	Up_In_A2	chr2	1928441	1928443	.	MYT1L
cg03704673	Up_In_A2	chr17	4692286	4692288	.	GLTPD2
cg03709468	Up_In_A2	chr4	156828284	156828286	.	TDO2
cg03718012	Up_In_A2	chr2	106227622	106227624	.	LOC285000
cg03721175	Up_In_A2	chr5	173390426	173390428	.	C5orf47
cg03721528	Up_In_A2	chr7	120967899	120967901	.	WNT16
cg03723845	Up_In_A2	chr5	180326185	180326187	.	BTNL8
cg03731740	Up_In_A2	chr1	29062688	29062690	.	YTHDF2
cg03734594	Up_In_A2	chr13	111297399	111297401	.	CARS2	CARKD
cg03743262	Up_In_A2	chr7	113728505	113728507	.	FOXP2
cg03748243	Up_In_A2	chr1	172413541	172413543	.	PIGC	C1orf105
cg03750567	Up_In_A2	chr1	27676636	27676638	.	SYTL1
cg03750903	Up_In_A2	chr1	193077839	193077841	.	GLRX2
cg03752259	Up_In_A2	chr7	4229893	4229895	.	SDK1
cg03768338	Up_In_A2	chr8	76823132	76823134	.	HNF4G
cg03774288	Up_In_A2	chr10	131647542	131647544	.	EBF3	MIR4297
cg03780701	Up_In_A2	chr8	38965385	38965387	.	ADAM32
cg03783110	Up_In_A2	chr17	1463738	1463740	.	PITPNA
cg03783575	Up_In_A2	chrX	104174301	104174303	.	IL1RAPL2	TEX13A
cg03787088	Up_In_A2	chr11	34847602	34847604	.	PDHX
cg03794617	Up_In_A2	chr17	78796998	78797000	.	RPTOR
cg03803789	Up_In_A2	chr11	111854002	111854004	.	DIXDC1
cg03809954	Up_In_A2	chr10	21801393	21801395	.	AK055656
cg03817621	Up_In_A2	chr10	52645398	52645400	.	A1CF
cg03818715	Up_In_A2	chr6	7591347	7591349	.	SNRNP48
cg03829559	Up_In_A2	chr2	54681905	54681907	.	SPTBN1
cg03835987	Up_In_A2	chr4	111120248	111120250	.	ELOVL6
cg03837106	Up_In_A2	chr4	149709110	149709112	.	5S_rRNA
cg03846881	Up_In_A2	chr15	32934835	32934837	.	SCG5
cg03847796	Up_In_A2	chr1	116653398	116653400	.	C1orf161	MAB21L3
cg03852847	Up_In_A2	chr2	233439512	233439514	.	EIF4E2
cg03854025	Up_In_A2	chr4	73753086	73753088	.	COX18
cg03856606	Up_In_A2	chr5	173998861	173998863	.	MSX2
cg03858047	Up_In_A2	chr2	28719041	28719043	.	PLB1
cg03858663	Up_In_A2	chr13	78976138	78976140	.	POU4F1
cg03870261	Up_In_A2	chr19	2428513	2428515	.	LMNB2	TIMM13
cg03875235	Up_In_A2	chr11	625051	625053	.	MUPCDH	CDHR5
cg03875996	Up_In_A2	chr4	159442781	159442783	.	RXFP1
cg03876340	Up_In_A2	chr3	155570581	155570583	.	SLC33A1
cg03878567	Up_In_A2	chr6	70952000	70952002	.	COL9A1
cg03879613	Up_In_A2	chr7	142965937	142965939	.	GSTK1
cg03882698	Up_In_A2	chr3	69230954	69230956	.	FRMD4B
cg03884238	Up_In_A2	chr9	112970589	112970591	.	C9orf152
cg03886558	Up_In_A2	chr12	57869489	57869491	.	ARHGAP9
cg03890368	Up_In_A2	chr22	42734694	42734696	.	BC038245
cg03890951	Up_In_A2	chr16	86233582	86233584	.	LOC146513
cg03895159	Up_In_A2	chr3	183355290	183355292	.	KLHL24
cg03900565	Up_In_A2	chr1	203031814	203031816	.	PPFIA4
cg03904639	Up_In_A2	chr13	37677729	37677731	.	CSNK1A1L
cg03906033	Up_In_A2	chr2	220307206	220307208	.	SPEG
cg03910557	Up_In_A2	chr6	126074638	126074640	.	HEY2
cg03917138	Up_In_A2	chr17	70120181	70120183	.	SOX9
cg03918530	Up_In_A2	chr3	44155649	44155651	.	MIR138-1
cg03922381	Up_In_A2	chr10	70977209	70977211	.	HKDC1
cg03925411	Up_In_A2	chr3	35986830	35986832	.	MIR128-2
cg03928367	Up_In_A2	chr20	34186994	34186996	.	FER1L4
cg03930313	Up_In_A2	chr17	36621404	36621406	.	ARHGAP23
cg03938043	Up_In_A2	chr1	212207850	212207852	.	INTS7	DTL
cg03938110	Up_In_A2	chr21	31120484	31120486	.	GRIK1	NCRNA00110	GRIK1-AS1
cg03952520	Up_In_A2	chr6	91145464	91145466	.	Mir_562
cg03956820	Up_In_A2	chr17	80190153	80190155	.	SLC16A3
cg03957095	Up_In_A2	chr8	143262199	143262201	.	MIR4472-1
cg03963174	Up_In_A2	chr1	184558492	184558494	.	C1orf21	EDEM3
cg03980224	Up_In_A2	chr5	34686874	34686876	.	RAI14
cg03988660	Up_In_A2	chr3	57316478	57316480	.	ASB14
cg03995457	Up_In_A2	chr16	52596675	52596677	.	TOX3
cg04001333	Up_In_A2	chr14	76045347	76045349	.	FLVCR2
cg04006839	Up_In_A2	chr17	64225435	64225437	.	APOH
cg04025761	Up_In_A2	chr12	111514550	111514552	.	CUX2
cg04027043	Up_In_A2	chr11	8378790	8378792	.	LMO1
cg04041976	Up_In_A2	chr8	67085822	67085824	.	TRIM55	CRH
cg04044188	Up_In_A2	chr10	27023189	27023191	.	PDSS1
cg04045327	Up_In_A2	chr4	905804	905806	.	GAK
cg04049508	Up_In_A2	chr16	55535987	55535989	.	MMP2	LPCAT2
cg04055345	Up_In_A2	chr10	116264861	116264863	.	ABLIM1
cg04058281	Up_In_A2	chr5	980579	980581	.	LOC100506688
cg04071104	Up_In_A2	chr3	53878641	53878643	.	CHDH
cg04085896	Up_In_A2	chr1	8088515	8088517	.	ERRFI1
cg04089800	Up_In_A2	chr1	46654769	46654771	.	POMGNT1
cg04091816	Up_In_A2	chr17	48179647	48179649	.	PDK2
cg04092437	Up_In_A2	chr10	92971268	92971270	.	PCGF5
cg04092803	Up_In_A2	chr13	47240377	47240379	.	LRCH1	AK123654
cg04094478	Up_In_A2	chr12	47220091	47220093	.	SLC38A4
cg04096619	Up_In_A2	chr5	9547594	9547596	.	SNORD123	SEMA5A	LOC100505806
cg04099454	Up_In_A2	chr7	87254299	87254301	.	ABCB1	RUNDC3B
cg04102384	Up_In_A2	chr6	31668621	31668623	.	BAT5	MIR4646
cg04105597	Up_In_A2	chr1	205585638	205585640	.	ELK4
cg04119303	Up_In_A2	chr11	1660512	1660514	.	HCCA2	KRTAP5-5
cg04119852	Up_In_A2	chr3	182840602	182840604	.	LAMP3	MCCC1
cg04125586	Up_In_A2	chr1	201982403	201982405	.	ELF3
cg04150100	Up_In_A2	chr11	111578125	111578127	.	SIK2	DQ599327
cg04150276	Up_In_A2	chr14	53256599	53256601	.	GNPNAT1
cg04155289	Up_In_A2	chr7	94953769	94953771	.	PON1
cg04164704	Up_In_A2	chr7	1563512	1563514	.	MAFK
cg04166544	Up_In_A2	chr2	230580573	230580575	.	DNER
cg04192393	Up_In_A2	chr15	63673285	63673287	.	CA12
cg04195226	Up_In_A2	chr17	16158685	16158687	.	PIGL	MIR1288
cg04206797	Up_In_A2	chr17	36689638	36689640	.	SRCIN1
cg04212846	Up_In_A2	chr21	36168007	36168009	.	RUNX1	AX746823
cg04217498	Up_In_A2	chr5	124532762	124532764	.	ZNF608
cg04221683	Up_In_A2	chr17	3576855	3576857	.	P2RX5	TMEM93
cg04227892	Up_In_A2	chr5	2169401	2169403	.	IRX4
cg04232360	Up_In_A2	chr1	2792743	2792745	.	TTC34
cg04236915	Up_In_A2	chr1	21578830	21578832	.	ECE1	AX747766
cg04244170	Up_In_A2	chr3	100116020	100116022	.	TOMM70A	LNP1
cg04249742	Up_In_A2	chr10	101285438	101285440	.	chromosome 10 open reading frame 139
cg04252928	Up_In_A2	chr16	89168598	89168600	.	ACSF3
cg04260307	Up_In_A2	chr14	55602633	55602635	.	LGALS3
cg04260584	Up_In_A2	chr2	100020389	100020391	.	REV1	EIF5B
cg04266474	Up_In_A2	chr7	36318490	36318492	.	EEPD1	KIAA0895
cg04275239	Up_In_A2	chr10	132912960	132912962	.	TCERG1L
cg04275337	Up_In_A2	chr10	105348955	105348957	.	NEURL
cg04275947	Up_In_A2	chr16	31146681	31146683	.	PRSS8
cg04277677	Up_In_A2	chr22	37914684	37914686	.	CARD10
cg04280590	Up_In_A2	chr9	33510386	33510388	.	SUGT1P1
cg04285141	Up_In_A2	chr16	57872426	57872428	.	KIFC3
cg04290171	Up_In_A2	chr1	207924481	207924483	.	CD46
cg04291891	Up_In_A2	chr11	15279826	15279828	.	INSC
cg04297867	Up_In_A2	chr15	63831569	63831571	.	USP3
cg04300159	Up_In_A2	chr17	16281513	16281515	.	UBB
cg04303335	Up_In_A2	chr14	82000857	82000859	.	SEL1L
cg04304872	Up_In_A2	chr2	208273527	208273529	.	CREB1
cg04308589	Up_In_A2	chr10	79110880	79110882	.	KCNMA1
cg04314111	Up_In_A2	chr1	2003576	2003578	.	PRKCZ
cg04322162	Up_In_A2	chr2	189315916	189315918	.	GULP1
cg04322572	Up_In_A2	chr10	43447617	43447619	.	RET
cg04330122	Up_In_A2	chr3	119316819	119316821	.	PLA1A
cg04337594	Up_In_A2	chr11	952927	952929	.	AP2A2
cg04344190	Up_In_A2	chr16	78218444	78218446	.	WWOX
cg04347477	Up_In_A2	chr12	125002006	125002008	.	NCOR2
cg04348305	Up_In_A2	chr20	25230958	25230960	.	PYGB
cg04350136	Up_In_A2	chr6	30616104	30616106	.	C6orf136
cg04351734	Up_In_A2	chr7	27155172	27155174	.	HOXA3
cg04357965	Up_In_A2	chr5	77945346	77945348	.	LHFPL2
cg04365699	Up_In_A2	chr3	177320996	177320998	.	AK056252
cg04388901	Up_In_A2	chr3	48056972	48056974	.	MAP4
cg04391800	Up_In_A2	chr3	65779801	65779803	.	MAGI1
cg04396112	Up_In_A2	chr7	2151006	2151008	.	MAD1L1
cg04396721	Up_In_A2	chr1	220958669	220958671	.	MOSC1	40969
cg04403423	Up_In_A2	chr1	116917618	116917620	.	ATP1A1
cg04408841	Up_In_A2	chr9	139659111	139659113	.	LCN15
cg04415672	Up_In_A2	chr12	58237705	58237707	.	CTDSP2
cg04420889	Up_In_A2	chr20	42187102	42187104	.	SGK2
cg04424119	Up_In_A2	chr1	8403679	8403681	.	SLC45A1
cg04427860	Up_In_A2	chr17	96055	96057	.	RPH3AL	DOC2B
cg04428071	Up_In_A2	chr17	80225376	80225378	.	CSNK1D
cg04432875	Up_In_A2	chr13	113411560	113411562	.	ATP11A	AX748036
cg04435320	Up_In_A2	chr11	33083020	33083022	.	TCP11L1
cg04435807	Up_In_A2	chr10	90610521	90610523	.	ANKRD22
cg04438074	Up_In_A2	chr10	63422538	63422540	.	C10orf107
cg04441453	Up_In_A2	chr5	41902082	41902084	.	C5orf51
cg04442426	Up_In_A2	chr5	37832521	37832523	.	GDNF
cg04444415	Up_In_A2	chr3	193272868	193272870	.	ATP13A4
cg04449108	Up_In_A2	chr2	234601253	234601255	.	UGT1A6	UGT1A7	UGT1A8	UGT1A9	UGT1A10
cg04452092	Up_In_A2	chr5	153438079	153438081	.	MFAP3
cg04453665	Up_In_A2	chr5	151504454	151504456	.	AK001582
cg04454664	Up_In_A2	chr5	71748551	71748553	.	ZNF366
cg04457051	Up_In_A2	chr4	141178468	141178470	.	SCOC
cg04468081	Up_In_A2	chr3	182983385	182983387	.	B3GNT5	MCF2L2
cg04471919	Up_In_A2	chr7	21584482	21584484	.	DNAH11
cg04476846	Up_In_A2	chr5	78791414	78791416	.	HOMER1
cg04487857	Up_In_A2	chr4	139096539	139096541	.	SLC7A11	LOC641365
cg04489243	Up_In_A2	chr3	189349128	189349130	.	TP63
cg04489851	Up_In_A2	chr1	25172225	25172227	.	Z24749
cg04493169	Up_In_A2	chr7	27912111	27912113	.	JAZF1
cg04499083	Up_In_A2	chr1	151168667	151168669	.	PIP5K1A
cg04505205	Up_In_A2	chr2	99004615	99004617	.	CNGA3
cg04519327	Up_In_A2	chr15	41149779	41149781	.	SPINT1
cg04519387	Up_In_A2	chr11	65556437	65556439	.	OVOL1
cg04524719	Up_In_A2	chr5	14065610	14065612	.	TRIO
cg04525408	Up_In_A2	chr17	74383273	74383275	.	SPHK1
cg04525441	Up_In_A2	chr10	1509791	1509793	.	ADARB2	ADARB2-AS1
cg04537185	Up_In_A2	chr21	43809566	43809568	.	TMPRSS3
cg04543516	Up_In_A2	chr20	21589092	21589094	.	Nkx2_2as
cg04548096	Up_In_A2	chr6	133691356	133691358	.	EYA4
cg04548715	Up_In_A2	chr7	99598774	99598776	.	ZKSCAN1
cg04559605	Up_In_A2	chr19	10593210	10593212	.	KEAP1
cg04560093	Up_In_A2	chr8	142217404	142217406	.	SLC45A4
cg04561804	Up_In_A2	chr3	169683975	169683977	.	LOC100128164	SEC62
cg04565201	Up_In_A2	chr13	53382855	53382857	.	MIR759
cg04567302	Up_In_A2	chr6	31846955	31846957	.	SLC44A4
cg04569555	Up_In_A2	chr17	80300613	80300615	.	SECTM1
cg04574732	Up_In_A2	chr1	179199938	179199940	.	ABL2
cg04581728	Up_In_A2	chr6	38690156	38690158	.	DNAH8
cg04583195	Up_In_A2	chr3	179165114	179165116	.	GNB4
cg04583430	Up_In_A2	chr5	117532040	117532042	.	BC044609
cg04583813	Up_In_A2	chr10	560322	560324	.	DIP2C
cg04586928	Up_In_A2	chr5	72413855	72413857	.	TMEM171
cg04587220	Up_In_A2	chr19	1071207	1071209	.	HMHA1
cg04592560	Up_In_A2	chr6	12701872	12701874	.	PHACTR1
cg04605148	Up_In_A2	chr10	61452080	61452082	.	SLC16A9
cg04606087	Up_In_A2	chr11	129907307	129907309	.	APLP2
cg04608582	Up_In_A2	chr1	113798120	113798122	.	LOC643441
cg04615290	Up_In_A2	chr6	32978128	32978130	.	HLA-DOA
cg04615639	Up_In_A2	chr17	77997949	77997951	.	TBC1D16
cg04623297	Up_In_A2	chr2	102051586	102051588	.	RFX8
cg04627863	Up_In_A2	chr2	234741669	234741671	.	HEATR7B1
cg04629827	Up_In_A2	chrX	37544456	37544458	.	XK
cg04630448	Up_In_A2	chr7	23373487	23373489	.	IGF2BP3
cg04636331	Up_In_A2	chr10	1509223	1509225	.	ADARB2	ADARB2-AS1
cg04636876	Up_In_A2	chr20	4702380	4702382	.	PRND
cg04643397	Up_In_A2	chr12	120118806	120118808	.	PRKAB1
cg04643690	Up_In_A2	chr15	60907748	60907750	.	RORA
cg04654118	Up_In_A2	chr5	172115366	172115368	.	NEURL1B
cg04658841	Up_In_A2	chr16	85478650	85478652	.	LOC727710
cg04660147	Up_In_A2	chr20	62716442	62716444	.	OPRL1	C20orf201
cg04664465	Up_In_A2	chr5	31048606	31048608	.	CDH6
cg04673430	Up_In_A2	chr10	81184101	81184103	.	ZCCHC24
cg04677937	Up_In_A2	chr9	113016525	113016527	.	TXN
cg04678141	Up_In_A2	chr10	29923919	29923921	.	SVIL
cg04680494	Up_In_A2	chr6	168417645	168417647	.	KIF25
cg04684206	Up_In_A2	chr2	134983538	134983540	.	MGAT5
cg04685962	Up_In_A2	chr16	50583728	50583730	.	NKD1
cg04688645	Up_In_A2	chr3	99772842	99772844	.	FILIP1L	C3orf26	MIR548G
cg04690342	Up_In_A2	chr2	109636679	109636681	.	EDAR
cg04691829	Up_In_A2	chr5	133510109	133510111	.	SKP1
cg04705318	Up_In_A2	chr14	100138305	100138307	.	HHIPL1	CYP46A1
cg04726373	Up_In_A2	chr16	67513467	67513469	.	ATP6V0D1
cg04742587	Up_In_A2	chr17	40554080	40554082	.	Mir_324
cg04745820	Up_In_A2	chr2	33249102	33249104	.	LTBP1
cg04778178	Up_In_A2	chr7	27162293	27162295	.	HOXA3	BC035889
cg04801085	Up_In_A2	chr14	103150011	103150013	.	RCOR1
cg04806150	Up_In_A2	chr13	112292609	112292611	.	C13orf16
cg04813834	Up_In_A2	chr16	81434929	81434931	.	MIR4720
cg04821009	Up_In_A2	chr5	94982162	94982164	.	RFESD
cg04821942	Up_In_A2	chr13	99629969	99629971	.	DOCK9
cg04828580	Up_In_A2	chr10	93639777	93639779	.	FGFBP3
cg04828792	Up_In_A2	chr21	42733432	42733434	.	MX2
cg04830355	Up_In_A2	chr14	101919779	101919781	.	DIO3AS
cg04833731	Up_In_A2	chr16	30124802	30124804	.	GDPD3	LOC100271831
cg04857881	Up_In_A2	chr16	47344825	47344827	.	ITFG1	Y_RNA
cg04859117	Up_In_A2	chr11	2011340	2011342	.	LOC100133545	MRPL23-AS1
cg04863005	Up_In_A2	chr1	59043207	59043209	.	TACSTD2
cg04865929	Up_In_A2	chr17	42908409	42908411	.	GJC1
cg04869380	Up_In_A2	chr2	240270792	240270794	.	HDAC4	MIR2467
cg04870470	Up_In_A2	chr1	101359713	101359715	.	EXTL2
cg04872399	Up_In_A2	chr1	201346783	201346785	.	TNNT2
cg04872848	Up_In_A2	chr14	76045542	76045544	.	FLVCR2
cg04874286	Up_In_A2	chr12	95477852	95477854	.	FGD6	NR2C1
cg04874580	Up_In_A2	chr8	30389209	30389211	.	RBPMS
cg04882739	Up_In_A2	chr3	108855427	108855429	.	FLJ22763
cg04885678	Up_In_A2	chr6	33046343	33046345	.	HLA-DPB1
cg04889043	Up_In_A2	chr10	93882844	93882846	.	CPEB3	SNORA25
cg04890480	Up_In_A2	chr1	181073733	181073735	.	IER5
cg04892437	Up_In_A2	chr1	231737900	231737902	.	TSNAX-DISC1	LOC100287814
cg04903623	Up_In_A2	chr6	137795450	137795452	.	OLIG3
cg04909529	Up_In_A2	chr12	104218301	104218303	.	NT5DC3
cg04909854	Up_In_A2	chr1	170253943	170253945	.	LOC284688
cg04910149	Up_In_A2	chr12	118502337	118502339	.	VSIG10	WSB2
cg04922203	Up_In_A2	chr5	115907569	115907571	.	SEMA6A
cg04927066	Up_In_A2	chr5	136833215	136833217	.	SPOCK1
cg04930921	Up_In_A2	chr4	3447795	3447797	.	HGFAC
cg04957377	Up_In_A2	chr14	21507258	21507260	.	RNASE7
cg04961042	Up_In_A2	chr14	30218599	30218601	.	PRKD1	MIR548AI
cg04969878	Up_In_A2	chr12	72079239	72079241	.	TMEM19
cg04972669	Up_In_A2	chr1	75808729	75808731	.	SLC44A5	LHX8
cg04977602	Up_In_A2	chr5	35230727	35230729	.	PRLR
cg04985582	Up_In_A2	chr21	15645987	15645989	.	ABCC13
cg04987122	Up_In_A2	chr16	2213439	2213441	.	TRAF7
cg04987857	Up_In_A2	chr12	69863676	69863678	.	FRS2
cg04994795	Up_In_A2	chr1	8404049	8404051	.	SLC45A1
cg04995521	Up_In_A2	chr1	8468870	8468872	.	RERE
cg04996020	Up_In_A2	chr7	107443897	107443899	.	SLC26A3
cg05002406	Up_In_A2	chr4	186425753	186425755	.	PDLIM3
cg05002602	Up_In_A2	chr14	68140485	68140487	.	VTI1B
cg05006473	Up_In_A2	chr4	1504480	1504482	.	AX748388
cg05007549	Up_In_A2	chr4	81103967	81103969	.	PRDM8
cg05008070	Up_In_A2	chr14	59106661	59106663	.	DACT1
cg05012239	Up_In_A2	chr3	195447690	195447692	.	MUC20
cg05017199	Up_In_A2	chr7	150497064	150497066	.	TMEM176A	TMEM176B
cg05018835	Up_In_A2	chr14	91338326	91338328	.	RPS6KA5	TTC7B
cg05028274	Up_In_A2	chr16	71755732	71755734	.	PHLPP2
cg05036937	Up_In_A2	chr5	52283759	52283761	.	ITGA2
cg05039382	Up_In_A2	chr8	25058765	25058767	.	DOCK5
cg05040235	Up_In_A2	chr15	93412759	93412761	.	LOC100507217
cg05040893	Up_In_A2	chr17	43034754	43034756	.	KIF18B
cg05043339	Up_In_A2	chr1	15255846	15255848	.	KIAA1026	KAZN
cg05043389	Up_In_A2	chr6	32978515	32978517	.	HLA-DOA
cg05046306	Up_In_A2	chr17	46698272	46698274	.	HOXB9
cg05051606	Up_In_A2	chr16	22103854	22103856	.	VWA3A
cg05052271	Up_In_A2	chrX	114794529	114794531	.	PLS3
cg05058809	Up_In_A2	chr16	834200	834202	.	MSLNL
cg05059922	Up_In_A2	chr12	94244495	94244497	.	CRADD	AK130911
cg05063520	Up_In_A2	chr8	49835998	49836000	.	SNAI2
cg05069807	Up_In_A2	chr4	6945701	6945703	.	TBC1D14	AX747238
cg05070273	Up_In_A2	chr3	48310896	48310898	.	ZNF589
cg05073620	Up_In_A2	chr3	57530798	57530800	.	DNAH12
cg05082609	Up_In_A2	chr11	105692830	105692832	.	GRIA4
cg05085336	Up_In_A2	chr3	73523728	73523730	.	PDZRN3
cg05089968	Up_In_A2	chr6	166722772	166722774	.	PRR18
cg05090695	Up_In_A2	chr11	2907669	2907671	.	CDKN1C
cg05091135	Up_In_A2	chr13	51103372	51103374	.	BCMS
cg05102670	Up_In_A2	chr11	2397322	2397324	.	CD81
cg05130355	Up_In_A2	chr7	41982336	41982338	.	GLI3
cg05132999	Up_In_A2	chr1	51796986	51796988	.	TTC39A
cg05138702	Up_In_A2	chr10	126826999	126827001	.	CTBP2
cg05140065	Up_In_A2	chr2	56113477	56113479	.	EFEMP1
cg05141014	Up_In_A2	chr5	59784202	59784204	.	PART1	PDE4D
cg05145233	Up_In_A2	chr16	89169857	89169859	.	ACSF3
cg05152432	Up_In_A2	chr1	1689886	1689888	.	NADK
cg05155595	Up_In_A2	chr2	70008160	70008162	.	ANXA4	AK125871
cg05162523	Up_In_A2	chr1	25240937	25240939	.	RUNX3	AX747207
cg05166801	Up_In_A2	chr7	116143458	116143460	.	CAV2
cg05168015	Up_In_A2	chr5	171880460	171880462	.	SH3PXD2B
cg05169454	Up_In_A2	chr2	38602910	38602912	.	ATL2
cg05173058	Up_In_A2	chr15	93573244	93573246	.	RGMA
cg05174942	Up_In_A2	chr5	140098391	140098393	.	VTRNA1-2
cg05179645	Up_In_A2	chr4	72077623	72077625	.	SLC4A4
cg05179921	Up_In_A2	chr12	9905752	9905754	.	CD69
cg05192898	Up_In_A2	chr12	104679482	104679484	.	TXNRD1
cg05199904	Up_In_A2	chr5	71251690	71251692	.	MAP1B
cg05205842	Up_In_A2	chr4	38673129	38673131	.	KLF3	FLJ13197
cg05206587	Up_In_A2	chrX	14547879	14547881	.	GLRA2
cg05211068	Up_In_A2	chr5	90575140	90575142	.	AK091866
cg05228110	Up_In_A2	chr19	552947	552949	.	GZMM
cg05230389	Up_In_A2	chr1	220132090	220132092	.	SLC30A10
cg05241828	Up_In_A2	chr8	145728506	145728508	.	GPT
cg05244762	Up_In_A2	chr16	74233199	74233201	.	BC043527
cg05250241	Up_In_A2	chr17	43321327	43321329	.	FMNL1
cg05258935	Up_In_A2	chr19	39086922	39086924	.	MAP4K1
cg05267427	Up_In_A2	chr4	146831053	146831055	.	ZNF827
cg05272790	Up_In_A2	chr11	117800275	117800277	.	TMPRSS13
cg05288711	Up_In_A2	chr3	501672	501674	.	BC065754
cg05290780	Up_In_A2	chr13	39609376	39609378	.	C13orf23	PROSER1
cg05291674	Up_In_A2	chr15	68480209	68480211	.	PIAS1	CALML4
cg05292310	Up_In_A2	chr4	88529583	88529585	.	DSPP
cg05298252	Up_In_A2	chr12	123311607	123311609	.	CCDC62	HIP1R
cg05301852	Up_In_A2	chr2	88427826	88427828	.	FABP1
cg05303901	Up_In_A2	chr7	28338624	28338626	.	CREB5
cg05313949	Up_In_A2	chr8	1211234	1211236	.	LOC286083
cg05315047	Up_In_A2	chr3	137766726	137766728	.	CLDN18
cg05324989	Up_In_A2	chr19	10822934	10822936	.	QTRT1	DNM2
cg05333968	Up_In_A2	chr4	187630020	187630022	.	FAT1
cg05334190	Up_In_A2	chr13	44880205	44880207	.	AX748251
cg05335893	Up_In_A2	chr2	43690471	43690473	.	THADA
cg05335944	Up_In_A2	chr10	13749009	13749011	.	FRMD4A	AK055017
cg05338187	Up_In_A2	chr1	236686597	236686599	.	LGALS8
cg05338976	Up_In_A2	chr7	114561849	114561851	.	MDFIC
cg05341260	Up_In_A2	chr17	37730449	37730451	.	NEUROD2
cg05352754	Up_In_A2	chr2	101034824	101034826	.	CHST10
cg05353659	Up_In_A2	chr17	41052657	41052659	.	G6PC
cg05355436	Up_In_A2	chr10	63520872	63520874	.	C10orf107
cg05357932	Up_In_A2	chr7	30326591	30326593	.	ZNRF2
cg05358575	Up_In_A2	chr2	26764960	26764962	.	OTOF
cg05359518	Up_In_A2	chr15	57508436	57508438	.	TCF12
cg05370838	Up_In_A2	chr10	135076573	135076575	.	ADAM8
cg05374463	Up_In_A2	chr15	76195521	76195523	.	FBXO22
cg05377839	Up_In_A2	chr3	61833670	61833672	.	PTPRG	ID2B
cg05383931	Up_In_A2	chr16	84336129	84336131	.	WFDC1
cg05384123	Up_In_A2	chr3	71294340	71294342	.	FOXP1
cg05385805	Up_In_A2	chr7	143106576	143106578	.	EPHA1
cg05391884	Up_In_A2	chr16	73206606	73206608	.	HTA
cg05396156	Up_In_A2	chr1	219497044	219497046	.	LYPLAL1
cg05396243	Up_In_A2	chr17	10707546	10707548	.	LOC100289255
cg05398883	Up_In_A2	chr1	42630334	42630336	.	GUCA2A
cg05399330	Up_In_A2	chr1	55464529	55464531	.	BSND
cg05415729	Up_In_A2	chr2	114045971	114045973	.	LOC440839	PAX8
cg05428706	Up_In_A2	chr10	102730129	102730131	.	SEMA4G
cg05430997	Up_In_A2	chr13	110397188	110397190	.	IRS2
cg05451388	Up_In_A2	chr3	183817677	183817679	.	HTR3E
cg05460486	Up_In_A2	chr2	53331759	53331761	.	ASB3
cg05475938	Up_In_A2	chr8	1581646	1581648	.	DLGAP2	AK093412
cg05482066	Up_In_A2	chr8	2106182	2106184	.	AX747124
cg05488279	Up_In_A2	chr17	1819769	1819771	.	RPA1
cg05489957	Up_In_A2	chr6	30177294	30177296	.	TRIM26
cg05490757	Up_In_A2	chr17	77130341	77130343	.	HRNBP3	ENGASE
cg05491166	Up_In_A2	chr11	19885900	19885902	.	NAV2	MIR4694
cg05491858	Up_In_A2	chr3	186891899	186891901	.	RTP1
cg05495391	Up_In_A2	chr5	7866766	7866768	.	FASTKD3
cg05499499	Up_In_A2	chr2	220263614	220263616	.	DNPEP
cg05499890	Up_In_A2	chr1	115238212	115238214	.	AMPD1
cg05500783	Up_In_A2	chr6	32410872	32410874	.	HLA-DRA
cg05506147	Up_In_A2	chr5	95950117	95950119	.	CAST
cg05511148	Up_In_A2	chr4	43277400	43277402	.	GRXCR1
cg05512869	Up_In_A2	chr6	112525702	112525704	.	LAMA4
cg05517400	Up_In_A2	chr7	92243190	92243192	.	CDK6	FAM133B
cg05517976	Up_In_A2	chr7	27220048	27220050	.	HOXA10	HOXA10-HOXA9
cg05519105	Up_In_A2	chr2	28718670	28718672	.	PLB1
cg05542757	Up_In_A2	chr13	39260428	39260430	.	FREM2
cg05545454	Up_In_A2	chr6	167284352	167284354	.	RPS6KA2
cg05548402	Up_In_A2	chr16	66115852	66115854	.	5S_rRNA
cg05548425	Up_In_A2	chr17	1553414	1553416	.	RILP
cg05556923	Up_In_A2	chr7	544576	544578	.	PDGFA
cg05569176	Up_In_A2	chr3	33841972	33841974	.	PDCD6IP
cg05572417	Up_In_A2	chr13	113637814	113637816	.	MCF2L
cg05573829	Up_In_A2	chr5	132175433	132175435	.	SHROOM1
cg05575639	Up_In_A2	chr8	61593695	61593697	.	CHD7
cg05578673	Up_In_A2	chr1	90307338	90307340	.	LRRC8D
cg05581314	Up_In_A2	chr6	30176815	30176817	.	TRIM26
cg05585149	Up_In_A2	chr10	695843	695845	.	C10orf108	DIP2C
cg05590087	Up_In_A2	chr5	38640040	38640042	.	LIFR
cg05604800	Up_In_A2	chr16	89913971	89913973	.	SPIRE2
cg05606082	Up_In_A2	chr2	21269909	21269911	.	APOB
cg05606799	Up_In_A2	chr1	204165306	204165308	.	KISS1
cg05610097	Up_In_A2	chr7	44360794	44360796	.	CAMK2B
cg05612422	Up_In_A2	chr22	50530702	50530704	.	MOV10L1
cg05616858	Up_In_A2	chr17	37843590	37843592	.	ERBB2	PGAP3
cg05617551	Up_In_A2	chr16	54209182	54209184	.	IRX3
cg05619712	Up_In_A2	chr2	208994719	208994721	.	CRYGC
cg05620980	Up_In_A2	chr7	562843	562845	.	FLJ44511
cg05624196	Up_In_A2	chr3	195310882	195310884	.	APOD
cg05630725	Up_In_A2	chr12	24104114	24104116	.	SOX5
cg05652551	Up_In_A2	chr3	142383106	142383108	.	PLS1
cg05655953	Up_In_A2	chr10	123810031	123810033	.	TACC2
cg05663278	Up_In_A2	chr16	8979124	8979126	.	CARHSP1
cg05664352	Up_In_A2	chr10	3441403	3441405	.	BC037918
cg05673287	Up_In_A2	chr15	77411981	77411983	.	SGK269	TSPAN3
cg05678498	Up_In_A2	chr12	94031875	94031877	.	CRADD
cg05682319	Up_In_A2	chr5	1003068	1003070	.	LOC100506688
cg05694089	Up_In_A2	chr1	16159483	16159485	.	SPEN
cg05696931	Up_In_A2	chr1	227175866	227175868	.	ADCK3
cg05707211	Up_In_A2	chr8	37330003	37330005	.	U6
cg05718288	Up_In_A2	chr5	135526588	135526590	.	LOC389332
cg05740254	Up_In_A2	chr4	187148562	187148564	.	KLKB1
cg05740655	Up_In_A2	chr8	59942922	59942924	.	TOX
cg05744395	Up_In_A2	chr7	36167903	36167905	.	EEPD1
cg05748796	Up_In_A2	chrX	15619336	15619338	.	ACE2
cg05749642	Up_In_A2	chr16	89982267	89982269	.	MC1R
cg05749728	Up_In_A2	chr10	126826901	126826903	.	CTBP2
cg05750047	Up_In_A2	chr1	149908084	149908086	.	MTMR11
cg05754402	Up_In_A2	chr8	49063038	49063040	.	UBE2V2
cg05756094	Up_In_A2	chr12	71608603	71608605	.	TSPAN8
cg05765761	Up_In_A2	chr11	123985613	123985615	.	VWA5A
cg05766605	Up_In_A2	chr1	19384826	19384828	.	AX747516
cg05770947	Up_In_A2	chr12	40280074	40280076	.	SLC2A13
cg05775918	Up_In_A2	chr11	117947554	117947556	.	TMPRSS4
cg05779364	Up_In_A2	chr1	220132136	220132138	.	SLC30A10
cg05783384	Up_In_A2	chr2	218843734	218843736	.	TNS1
cg05789881	Up_In_A2	chr3	25467533	25467535	.	LOC100130354
cg05790960	Up_In_A2	chr1	6307675	6307677	.	GPR153	HES3
cg05796838	Up_In_A2	chr19	17953156	17953158	.	JAK3
cg05797770	Up_In_A2	chr1	16470666	16470668	.	EPHA2
cg05800561	Up_In_A2	chr1	39680295	39680297	.	MACF1
cg05802545	Up_In_A2	chr1	107921854	107921856	.	NTNG1
cg05803361	Up_In_A2	chr1	145727319	145727321	.	PDZK1
cg05806387	Up_In_A2	chrX	44168211	44168213	.	EFHC2
cg05808246	Up_In_A2	chr1	221741552	221741554	.	DUSP10
cg05810731	Up_In_A2	chr13	91049885	91049887	.	BC038529
cg05816398	Up_In_A2	chr7	104623426	104623428	.	LOC100216546
cg05820087	Up_In_A2	chr3	193272560	193272562	.	ATP13A4
cg05824218	Up_In_A2	chr17	38499095	38499097	.	RARA
cg05833518	Up_In_A2	chrX	49832093	49832095	.	CLCN5
cg05836184	Up_In_A2	chr7	114686941	114686943	.	BC022431
cg05837890	Up_In_A2	chr20	4702537	4702539	.	PRND
cg05839786	Up_In_A2	chrX	44702506	44702508	.	DUSP21
cg05844572	Up_In_A2	chr17	80300262	80300264	.	SECTM1
cg05848579	Up_In_A2	chr16	1308102	1308104	.	TPSD1
cg05850884	Up_In_A2	chr6	30174844	30174846	.	TRIM26
cg05852888	Up_In_A2	chr5	141075425	141075427	.	ARAP3
cg05859267	Up_In_A2	chr16	77469666	77469668	.	ADAMTS18
cg05864564	Up_In_A2	chr7	4017626	4017628	.	SDK1
cg05869611	Up_In_A2	chr7	80096607	80096609	.	GNAT3
cg05870439	Up_In_A2	chr10	117828912	117828914	.	GFRA1
cg05871425	Up_In_A2	chr4	151186110	151186112	.	LRBA
cg05872387	Up_In_A2	chr2	242716800	242716802	.	GAL3ST2
cg05877661	Up_In_A2	chr11	1095155	1095157	.	MUC2
cg05880252	Up_In_A2	chr2	124773562	124773564	.	AX747402
cg05881698	Up_In_A2	chr19	5818762	5818764	.	NRTN
cg05893709	Up_In_A2	chr8	39836063	39836065	.	IDO2
cg05895507	Up_In_A2	chr15	77155634	77155636	.	SCAPER
cg05896468	Up_In_A2	chr10	134096879	134096881	.	STK32C
cg05896714	Up_In_A2	chr17	19247836	19247838	.	MIR1180	B9D1
cg05897163	Up_In_A2	chr17	37782301	37782303	.	PPP1R1B
cg05903710	Up_In_A2	chr16	27375731	27375733	.	IL4R	IL21R
cg05905731	Up_In_A2	chr16	85485784	85485786	.	LOC727710
cg05917797	Up_In_A2	chr14	62075109	62075111	.	FLJ22447
cg05918292	Up_In_A2	chr14	47834519	47834521	.	MDGA2
cg05921889	Up_In_A2	chr7	34076102	34076104	.	BMPER
cg05923681	Up_In_A2	chr3	52580706	52580708	.	PBRM1	C3orf78
cg05928904	Up_In_A2	chr17	16924596	16924598	.	MPRIP
cg05929864	Up_In_A2	chr11	107583405	107583407	.	SLN
cg05942111	Up_In_A2	chr12	65044026	65044028	.	RASSF3
cg05945030	Up_In_A2	chr11	129869653	129869655	.	PRDM10	LINC00167
cg05955301	Up_In_A2	chr1	203444535	203444537	.	PRELP
cg05957544	Up_In_A2	chr21	45360803	45360805	.	AGPAT3
cg05968369	Up_In_A2	chr1	3320445	3320447	.	PRDM16	ARHGEF16
cg05968904	Up_In_A2	chr7	194718	194720	.	FAM20C
cg05977696	Up_In_A2	chr2	154669329	154669331	.	GALNT13
cg05979619	Up_In_A2	chr2	112704576	112704578	.	MERTK	Metazoa_SRP
cg05981794	Up_In_A2	chr16	57872385	57872387	.	KIFC3
cg05985988	Up_In_A2	chr6	15304884	15304886	.	JARID2
cg05989861	Up_In_A2	chr2	95940030	95940032	.	PROM2
cg05991401	Up_In_A2	chr17	72741151	72741153	.	RAB37	MIR3615
cg05991442	Up_In_A2	chr17	73636183	73636185	.	RECQL5	LOC643008	C17orf110
cg05992904	Up_In_A2	chr22	48892993	48892995	.	FAM19A5
cg05995260	Up_In_A2	chr17	80342458	80342460	.	AF075112
cg05997059	Up_In_A2	chr7	116411779	116411781	.	MET	CAPZA2
cg06000610	Up_In_A2	chr7	157623117	157623119	.	PTPRN2	LOC100506585
cg06007850	Up_In_A2	chr6	2134143	2134145	.	GMDS
cg06024295	Up_In_A2	chr10	101841415	101841417	.	CPN1
cg06024930	Up_In_A2	chr12	121890327	121890329	.	KDM2B
cg06026334	Up_In_A2	chr21	47560126	47560128	.	FTCD
cg06037963	Up_In_A2	chr2	242716558	242716560	.	GAL3ST2
cg06038358	Up_In_A2	chr2	128176006	128176008	.	PROC
cg06048193	Up_In_A2	chr13	81258754	81258756	.	SPRY2
cg06048910	Up_In_A2	chr11	2925472	2925474	.	SLC22A18AS	SLC22A18
cg06051146	Up_In_A2	chr11	57424283	57424285	.	CLP1
cg06055229	Up_In_A2	chr5	124077965	124077967	.	ZNF608
cg06057528	Up_In_A2	chr5	71757959	71757961	.	ZNF366
cg06063479	Up_In_A2	chr2	145184892	145184894	.	ZEB2	AK124806
cg06069154	Up_In_A2	chr1	156889825	156889827	.	C1orf92	LRRC71
cg06073139	Up_In_A2	chr16	58718949	58718951	.	SLC38A7
cg06076692	Up_In_A2	chr6	16736891	16736893	.	ATXN1
cg06087554	Up_In_A2	chr16	31151916	31151918	.	PRSS36	PRSS8
cg06092178	Up_In_A2	chr3	50708854	50708856	.	MIR4787
cg06093525	Up_In_A2	chr6	136874705	136874707	.	MAP7
cg06098276	Up_In_A2	chr17	76171207	76171209	.	TK1	SYNGR2
cg06100639	Up_In_A2	chr7	143602067	143602069	.	FAM115A
cg06101841	Up_In_A2	chr3	48758047	48758049	.	IP6K2
cg06109482	Up_In_A2	chr2	232531086	232531088	.	BC069004
cg06119162	Up_In_A2	chr21	46678523	46678525	.	POFUT2
cg06127256	Up_In_A2	chr16	73206587	73206589	.	HTA
cg06137072	Up_In_A2	chr3	141087186	141087188	.	ZBTB38
cg06145435	Up_In_A2	chr7	1022768	1022770	.	CYP2W1
cg06146977	Up_In_A2	chr13	43469463	43469465	.	EPSTI1
cg06147895	Up_In_A2	chr10	133791400	133791402	.	BNIP3
cg06149212	Up_In_A2	chr13	93932638	93932640	.	GPC6
cg06151171	Up_In_A2	chr2	24712361	24712363	.	NCOA1
cg06156640	Up_In_A2	chr2	3704362	3704364	.	ALLC
cg06157561	Up_In_A2	chrX	24690869	24690871	.	PCYT1B
cg06159484	Up_In_A2	chr1	8087589	8087591	.	ERRFI1
cg06160397	Up_In_A2	chr7	2565943	2565945	.	LFNG	MIR4648
cg06160973	Up_In_A2	chr12	57522812	57522814	.	LRP1	STAT6
cg06173536	Up_In_A2	chr1	235814461	235814463	.	GNG4
cg06174078	Up_In_A2	chr11	1325717	1325719	.	TOLLIP
cg06184785	Up_In_A2	chr15	90456923	90456925	.	C15orf38	C15orf38-AP3S2
cg06193232	Up_In_A2	chr17	62161105	62161107	.	ERN1	DQ572107
cg06196689	Up_In_A2	chr3	124653631	124653633	.	MUC13
cg06214869	Up_In_A2	chr7	85151453	85151455	.	SEMA3D
cg06223834	Up_In_A2	chr16	4103160	4103162	.	ADCY9
cg06226516	Up_In_A2	chr7	13072313	13072315	.	ARL4A
cg06227406	Up_In_A2	chr12	70999957	70999959	.	PTPRB
cg06228599	Up_In_A2	chr6	47010090	47010092	.	GPR110
cg06231565	Up_In_A2	chr12	1738267	1738269	.	WNT5B
cg06232466	Up_In_A2	chr16	1222187	1222189	.	CACNA1H
cg06233985	Up_In_A2	chr11	5249527	5249529	.	HBB
cg06234051	Up_In_A2	chr17	70120540	70120542	.	SOX9
cg06238004	Up_In_A2	chr17	42029726	42029728	.	PYY
cg06239055	Up_In_A2	chr17	58524	58526	.	DOC2B
cg06248428	Up_In_A2	chr10	32478849	32478851	.	Y_RNA
cg06250841	Up_In_A2	chr8	58138047	58138049	.	LOC100507651
cg06254336	Up_In_A2	chr2	228362003	228362005	.	AGFG1
cg06259612	Up_In_A2	chr12	133179337	133179339	.	LOC100507055
cg06262280	Up_In_A2	chr2	173330295	173330297	.	ITGA6
cg06271720	Up_In_A2	chr2	217484858	217484860	.	IGFBP2
cg06282059	Up_In_A2	chr3	23846691	23846693	.	UBE2E1
cg06284479	Up_In_A2	chr3	37173545	37173547	.	LRRFIP2	U6
cg06285921	Up_In_A2	chr12	117535576	117535578	.	TESC
cg06289725	Up_In_A2	chr11	62689080	62689082	.	CHRM1
cg06290096	Up_In_A2	chr11	118475983	118475985	.	PHLDB1
cg06295294	Up_In_A2	chr4	159956322	159956324	.	C4orf45
cg06295784	Up_In_A2	chr6	160771073	160771075	.	SLC22A3
cg06298701	Up_In_A2	chr10	51566672	51566674	.	NCOA4
cg06301529	Up_In_A2	chr17	26127521	26127523	.	NOS2
cg06301673	Up_In_A2	chr3	193273056	193273058	.	ATP13A4
cg06302541	Up_In_A2	chr11	125363616	125363618	.	FEZ1	MGC39545
cg06306791	Up_In_A2	chr6	32854969	32854971	.	LOC100294145
cg06308084	Up_In_A2	chr22	50493569	50493571	.	TTLL8	MLC1
cg06327732	Up_In_A2	chr3	121795810	121795812	.	CD86
cg06334737	Up_In_A2	chr11	61976194	61976196	.	SCGB2A1
cg06336230	Up_In_A2	chr3	197401571	197401573	.	KIAA0226	MIR922
cg06338708	Up_In_A2	chr4	115843932	115843934	.	NDST4	Metazoa_SRP
cg06339573	Up_In_A2	chr7	157372261	157372263	.	PTPRN2	MIR153-2
cg06339706	Up_In_A2	chr19	49371284	49371286	.	PLEKHA4
cg06345909	Up_In_A2	chr22	30645309	30645311	.	LIF
cg06350882	Up_In_A2	chr7	47120533	47120535	.	AK310472
cg06351796	Up_In_A2	chr6	16345633	16345635	.	ATXN1	GMPR
cg06357743	Up_In_A2	chr6	30041726	30041728	.	RNF39
cg06358191	Up_In_A2	chr1	1227137	1227139	.	SCNN1D	ACAP3
cg06358671	Up_In_A2	chr4	5976156	5976158	.	C4orf50	FLJ46481
cg06363129	Up_In_A2	chr7	16505601	16505603	.	SOSTDC1
cg06374748	Up_In_A2	chr17	52978855	52978857	.	TOM1L1
cg06387669	Up_In_A2	chr17	1646195	1646197	.	SERPINF2
cg06389098	Up_In_A2	chr16	71424251	71424253	.	CALB2
cg06394333	Up_In_A2	chr7	121437818	121437820	.	7SK
cg06406538	Up_In_A2	chrX	56255849	56255851	.	KLF8
cg06419964	Up_In_A2	chr17	34965293	34965295	.	MRM1
cg06421238	Up_In_A2	chr17	5993784	5993786	.	WSCD1	MtDNA_ssA
cg06422039	Up_In_A2	chr16	1128697	1128699	.	LOC146336	SSTR5	BC084558
cg06427867	Up_In_A2	chr21	31588660	31588662	.	CLDN8
cg06429194	Up_In_A2	chr11	128080304	128080306	.	ETS1
cg06430479	Up_In_A2	chr11	95091988	95091990	.	SESN3
cg06431681	Up_In_A2	chr2	202330989	202330991	.	STRADB
cg06433895	Up_In_A2	chr16	68873849	68873851	.	TMCO7
cg06434709	Up_In_A2	chr19	3594719	3594721	.	TBXA2R	GIPC3
cg06437740	Up_In_A2	chr13	48575926	48575928	.	SUCLA2
cg06441150	Up_In_A2	chr1	111990834	111990836	.	WDR77	ATP5F1
cg06446432	Up_In_A2	chr1	77307267	77307269	.	ST6GALNAC5
cg06447378	Up_In_A2	chr13	39358892	39358894	.	FREM2
cg06455422	Up_In_A2	chr13	98875359	98875361	.	FARP1	MIR3170
cg06464324	Up_In_A2	chr7	544923	544925	.	PDGFA
cg06468626	Up_In_A2	chr5	169409234	169409236	.	DOCK2	FAM196B
cg06476438	Up_In_A2	chr2	12674763	12674765	.	TRIB2
cg06477164	Up_In_A2	chr2	37375681	37375683	.	EIF2AK2
cg06479609	Up_In_A2	chr13	51971622	51971624	.	INTS6
cg06485114	Up_In_A2	chr5	180047298	180047300	.	FLT4
cg06486618	Up_In_A2	chr19	524261	524263	.	CDC34
cg06489077	Up_In_A2	chr3	65532187	65532189	.	MAGI1
cg06489586	Up_In_A2	chr17	60138998	60139000	.	MED13
cg06501988	Up_In_A2	chr2	196696231	196696233	.	DNAH7
cg06502570	Up_In_A2	chr20	59832923	59832925	.	CDH4
cg06518271	Up_In_A2	chr4	100140324	100140326	.	ADH6
cg06532574	Up_In_A2	chr5	95295739	95295741	.	ELL2
cg06544185	Up_In_A2	chr10	85712040	85712042	.	GHITM
cg06547034	Up_In_A2	chr10	87403728	87403730	.	GRID1	AX746544
cg06549238	Up_In_A2	chr11	93277160	93277162	.	C11orf75
cg06563450	Up_In_A2	chr5	55737210	55737212	.	U6atac
cg06564875	Up_In_A2	chr5	157353779	157353781	.	Mir_384
cg06565368	Up_In_A2	chr11	131907819	131907821	.	NTM
cg06565975	Up_In_A2	chr8	143823916	143823918	.	SLURP1
cg06568438	Up_In_A2	chr13	80315398	80315400	.	Mir_548
cg06570843	Up_In_A2	chr4	120243251	120243253	.	FABP2
cg06573088	Up_In_A2	chr6	17492720	17492722	.	CAP2
cg06580523	Up_In_A2	chr12	132908453	132908455	.	GALNT9
cg06581825	Up_In_A2	chr2	162838363	162838365	.	SLC4A10	DPP4
cg06598544	Up_In_A2	chr20	61472146	61472148	.	COL9A3	DPH3P1
cg06609646	Up_In_A2	chr5	125758446	125758448	.	GRAMD3
cg06610259	Up_In_A2	chr12	122515331	122515333	.	MLXIP
cg06614944	Up_In_A2	chr2	71463631	71463633	.	PAIP2B
cg06628999	Up_In_A2	chr6	142129231	142129233	.	JA611294
cg06630567	Up_In_A2	chr9	116840434	116840436	.	AMBP
cg06630771	Up_In_A2	chr12	24913803	24913805	.	BCAT1
cg06631999	Up_In_A2	chr1	26217267	26217269	.	STMN1
cg06633013	Up_In_A2	chr19	14170955	14170957	.	PALM3
cg06633162	Up_In_A2	chr6	158481401	158481403	.	SYNJ2
cg06637774	Up_In_A2	chr11	72975701	72975703	.	P2RY6
cg06640374	Up_In_A2	chr1	207250783	207250785	.	PFKFB2	C4BPB
cg06640637	Up_In_A2	chr20	42984323	42984325	.	HNF4A
cg06645120	Up_In_A2	chr16	89888816	89888818	.	FANCA
cg06663149	Up_In_A2	chr4	41457557	41457559	.	LIMCH1
cg06665322	Up_In_A2	chr1	167059364	167059366	.	GPA33
cg06678772	Up_In_A2	chr15	41121462	41121464	.	PPP1R14D
cg06685950	Up_In_A2	chr9	34375738	34375740	.	KIAA1161
cg06686857	Up_In_A2	chr8	94751453	94751455	.	RBM12B	C8orf39
cg06688621	Up_In_A2	chr18	74062784	74062786	.	ZNF516
cg06689259	Up_In_A2	chr10	90655536	90655538	.	STAMBPL1
cg06690548	Up_In_A2	chr4	139162807	139162809	.	SLC7A11
cg06697448	Up_In_A2	chr3	8544911	8544913	.	LMCD1
cg06699848	Up_In_A2	chr11	8847661	8847663	.	ST5
cg06704455	Up_In_A2	chr22	37815263	37815265	.	ELFN2
cg06704884	Up_In_A2	chr4	40665352	40665354	.	RBM47
cg06706813	Up_In_A2	chr3	194826410	194826412	.	C3orf21	XXYLT1
cg06707899	Up_In_A2	chr16	71761030	71761032	.	PHLPP2
cg06710785	Up_In_A2	chr10	83683828	83683830	.	NRG3
cg06711259	Up_In_A2	chr22	39095897	39095899	.	JOSD1
cg06713671	Up_In_A2	chr19	5914157	5914159	.	CAPS
cg06716698	Up_In_A2	chr11	12707594	12707596	.	TEAD1
cg06724078	Up_In_A2	chr1	48429550	48429552	.	LOC388630
cg06727067	Up_In_A2	chr5	92582154	92582156	.	FLJ42709
cg06729532	Up_In_A2	chr19	14376769	14376771	.	LPHN1
cg06736000	Up_In_A2	chr2	242875902	242875904	.	AK097934
cg06743037	Up_In_A2	chr7	80550530	80550532	.	SEMA3C
cg06749803	Up_In_A2	chr1	2360073	2360075	.	PEX10
cg06755555	Up_In_A2	chr17	46704639	46704641	.	HOXB9
cg06759993	Up_In_A2	chr6	144065202	144065204	.	PHACTR2
cg06763161	Up_In_A2	chr1	33813744	33813746	.	PHC2
cg06766034	Up_In_A2	chr22	47082259	47082261	.	CERK	GRAMD4
cg06767191	Up_In_A2	chr1	1095736	1095738	.	MIR200B
cg06768599	Up_In_A2	chr14	24785487	24785489	.	LTB4R
cg06772099	Up_In_A2	chr2	172291679	172291681	.	METTL8	DCAF17
cg06772309	Up_In_A2	chr1	17571895	17571897	.	PADI1	PADI3
cg06790305	Up_In_A2	chr21	32412190	32412192	.	KRTAP19-8
cg06796120	Up_In_A2	chr17	80772941	80772943	.	TBCD	ZNF750
cg06817269	Up_In_A2	chr15	59909034	59909036	.	GCNT3
cg06817669	Up_In_A2	chr15	77518881	77518883	.	SGK269	C15orf5
cg06817736	Up_In_A2	chr4	38108808	38108810	.	TBC1D1
cg06825512	Up_In_A2	chr18	10453968	10453970	.	APCDD1
cg06827501	Up_In_A2	chr1	208472272	208472274	.	PLXNA2
cg06829681	Up_In_A2	chr11	12867452	12867454	.	TEAD1
cg06833098	Up_In_A2	chr17	38290795	38290797	.	MSL1
cg06834177	Up_In_A2	chr1	6333842	6333844	.	ACOT7	GPR153
cg06835156	Up_In_A2	chr14	101131458	101131460	.	C14orf70	LINC00523
cg06837799	Up_In_A2	chr7	27160959	27160961	.	HOXA3	AK311383
cg06839417	Up_In_A2	chr3	149106150	149106152	.	TM4SF1
cg06841648	Up_In_A2	chr16	85479052	85479054	.	LOC727710
cg06849167	Up_In_A2	chr11	61449885	61449887	.	DAGLA
cg06855485	Up_In_A2	chr4	144303007	144303009	.	GAB1
cg06866423	Up_In_A2	chr6	90926671	90926673	.	BACH2
cg06869505	Up_In_A2	chr1	15527516	15527518	.	TMEM51	FHAD1
cg06871999	Up_In_A2	chr7	104460406	104460408	.	LHFPL3	LOC645591
cg06875131	Up_In_A2	chr17	63554467	63554469	.	AXIN2
cg06878009	Up_In_A2	chr16	77874010	77874012	.	VAT1L
cg06878649	Up_In_A2	chr16	84336111	84336113	.	WFDC1
cg06886374	Up_In_A2	chr16	1844151	1844153	.	IGFALS
cg06895640	Up_In_A2	chr11	93277190	93277192	.	C11orf75
cg06900571	Up_In_A2	chr8	141248581	141248583	.	TRAPPC9
cg06902609	Up_In_A2	chr7	985718	985720	.	ADAP1
cg06902698	Up_In_A2	chr1	151137675	151137677	.	LYSMD1	SCNM1
cg06909248	Up_In_A2	chr17	70256461	70256463	.	SOX9
cg06911238	Up_In_A2	chr1	46859670	46859672	.	FAAH
cg06911744	Up_In_A2	chr1	3276506	3276508	.	PRDM16	ARHGEF16
cg06913865	Up_In_A2	chr1	219239945	219239947	.	LOC643723
cg06915192	Up_In_A2	chr5	7392263	7392265	.	ADCY2
cg06924233	Up_In_A2	chr14	97260743	97260745	.	VRK1
cg06928246	Up_In_A2	chr1	227974644	227974646	.	PRSS38
cg06942111	Up_In_A2	chr1	108115415	108115417	.	VAV3
cg06942142	Up_In_A2	chr22	21307594	21307596	.	CRKL	BC033281
cg06948763	Up_In_A2	chr1	110763077	110763079	.	KCNC4
cg06983052	Up_In_A2	chr1	90288098	90288100	.	LRRC8D
cg06985721	Up_In_A2	chr1	55464652	55464654	.	BSND
cg06986584	Up_In_A2	chr1	180904676	180904678	.	KIAA1614
cg06992213	Up_In_A2	chr6	22718573	22718575	.	HDGFL1
cg06996956	Up_In_A2	chr10	50264252	50264254	.	C10orf72	VSTM4
cg07002540	Up_In_A2	chr2	85281127	85281129	.	KCMF1	TCF7L1
cg07004950	Up_In_A2	chr5	159508664	159508666	.	PWWP2A
cg07005353	Up_In_A2	chr1	220097970	220097972	.	SLC30A10
cg07006935	Up_In_A2	chr7	55620640	55620642	.	VOPP1
cg07014154	Up_In_A2	chr2	65655509	65655511	.	SPRED2
cg07029777	Up_In_A2	chr2	1658232	1658234	.	PXDN
cg07037412	Up_In_A2	chr16	1234808	1234810	.	CACNA1H
cg07041428	Up_In_A2	chr4	1763018	1763020	.	FGFR3
cg07041565	Up_In_A2	chr15	72480269	72480271	.	GRAMD2
cg07045803	Up_In_A2	chr4	160125666	160125668	.	RAPGEF2
cg07048527	Up_In_A2	chr17	46700448	46700450	.	HOXB9
cg07052524	Up_In_A2	chr19	40009834	40009836	.	SELV
cg07053546	Up_In_A2	chr2	161185940	161185942	.	RBMS1	ITGB6
cg07059925	Up_In_A2	chr11	108422935	108422937	.	EXPH5
cg07060505	Up_In_A2	chr12	116756135	116756137	.	MED13L
cg07061351	Up_In_A2	chrX	72781732	72781734	.	LOC139201	CHIC1
cg07064544	Up_In_A2	chr20	43029993	43029995	.	HNF4A
cg07066918	Up_In_A2	chr10	129910467	129910469	.	MKI67
cg07075026	Up_In_A2	chr17	47091520	47091522	.	IGF2BP1
cg07083043	Up_In_A2	chr17	17397971	17397973	.	RASD1
cg07088513	Up_In_A2	chr3	48232721	48232723	.	CDC25A
cg07090539	Up_In_A2	chr17	70619852	70619854	.	LINC00511
cg07091481	Up_In_A2	chr10	82169148	82169150	.	C10orf58
cg07093456	Up_In_A2	chr10	118380176	118380178	.	PNLIPRP2
cg07094847	Up_In_A2	chr7	27160585	27160587	.	HOXA3	AK311383
cg07096218	Up_In_A2	chr1	95581951	95581953	.	TMEM56
cg07097722	Up_In_A2	chr20	43247324	43247326	.	PKIG	ADA
cg07097725	Up_In_A2	chr10	6162726	6162728	.	RBM17
cg07102229	Up_In_A2	chr12	47219957	47219959	.	SLC38A4
cg07105499	Up_In_A2	chr16	55909392	55909394	.	CES7	CES5A
cg07106615	Up_In_A2	chr15	43785973	43785975	.	TP53BP1
cg07108754	Up_In_A2	chr15	97436160	97436162	.	SPATA8
cg07109745	Up_In_A2	chr11	3901551	3901553	.	STIM1	MIR4687
cg07109801	Up_In_A2	chr3	49057660	49057662	.	MIR425	DALRD3	NDUFAF3
cg07114544	Up_In_A2	chr17	9110368	9110370	.	NTN1
cg07115116	Up_In_A2	chrX	20154229	20154231	.	EIF1AX	SCARNA9L
cg07117596	Up_In_A2	chr1	233495165	233495167	.	KIAA1804
cg07124138	Up_In_A2	chr16	88683902	88683904	.	ZC3H18
cg07125976	Up_In_A2	chr16	14499947	14499949	.	mir-108-1
cg07128624	Up_In_A2	chr12	108153565	108153567	.	PRDM4
cg07134252	Up_In_A2	chr6	168581458	168581460	.	FRMD1
cg07135660	Up_In_A2	chr5	133343842	133343844	.	VDAC1
cg07148458	Up_In_A2	chr17	7254300	7254302	.	KCTD11	ACAP1
cg07150719	Up_In_A2	chr14	50485159	50485161	.	C14orf182
cg07150830	Up_In_A2	chr17	26127541	26127543	.	NOS2
cg07152812	Up_In_A2	chr13	24736517	24736519	.	SPATA13	MIR2276
cg07152925	Up_In_A2	chr21	48024682	48024684	.	S100B
cg07157757	Up_In_A2	chr11	655444	655446	.	DEAF1	DRD4
cg07166795	Up_In_A2	chr1	44351060	44351062	.	ST3GAL3	ARTN
cg07173283	Up_In_A2	chr6	32975589	32975591	.	HLA-DOA
cg07179075	Up_In_A2	chr1	97706030	97706032	.	DPYD	PTBLP
cg07180571	Up_In_A2	chr2	122156916	122156918	.	CLASP1
cg07185287	Up_In_A2	chr10	79797843	79797845	.	RPS24
cg07185664	Up_In_A2	chr17	1412949	1412951	.	INPP5K
cg07194250	Up_In_A2	chrX	133680462	133680464	.	MGC16121	MIR503
cg07197585	Up_In_A2	chr1	92494996	92494998	.	EPHX4
cg07201319	Up_In_A2	chr6	139909640	139909642	.	LOC645434
cg07209841	Up_In_A2	chr2	71038248	71038250	.	CLEC4F
cg07212541	Up_In_A2	chr15	101442709	101442711	.	ALDH1A3	AF198444
cg07214314	Up_In_A2	chr6	160511936	160511938	.	IGF2R	LOC729603
cg07214954	Up_In_A2	chr5	123997878	123997880	.	ZNF608
cg07219303	Up_In_A2	chr4	100140904	100140906	.	ADH6
cg07221454	Up_In_A2	chr11	60552840	60552842	.	MS4A10
cg07224636	Up_In_A2	chr12	29898655	29898657	.	TMTC1
cg07238450	Up_In_A2	chr5	15720152	15720154	.	FBXL7	Mir_887
cg07243141	Up_In_A2	chr7	73408059	73408061	.	ELN
cg07246713	Up_In_A2	chr20	62722932	62722934	.	OPRL1
cg07259418	Up_In_A2	chr3	64142956	64142958	.	PRICKLE2
cg07262873	Up_In_A2	chr5	54987766	54987768	.	SLC38A9
cg07275552	Up_In_A2	chr5	83874979	83874981	.	EDIL3
cg07281377	Up_In_A2	chr16	1113890	1113892	.	SSTR5
cg07283795	Up_In_A2	chr5	86060075	86060077	.	BC041393
cg07285213	Up_In_A2	chr5	1292338	1292340	.	TERT
cg07290269	Up_In_A2	chr12	31479852	31479854	.	FAM60A
cg07295586	Up_In_A2	chr8	142984466	142984468	.	MIR4472-1
cg07299736	Up_In_A2	chr8	135490786	135490788	.	ZFAT
cg07301061	Up_In_A2	chr12	80663710	80663712	.	OTOGL
cg07302938	Up_In_A2	chr7	12729526	12729528	.	ARL4A
cg07313720	Up_In_A2	chr2	209029593	209029595	.	CRYGA	CRYGD
cg07337598	Up_In_A2	chr1	150953942	150953944	.	ANXA9
cg07340894	Up_In_A2	chr8	8238773	8238775	.	PRAGMIN	SGK223
cg07340922	Up_In_A2	chr11	114548758	114548760	.	FAM55B
cg07343703	Up_In_A2	chr1	244015223	244015225	.	AKT3
cg07344355	Up_In_A2	chr15	40633415	40633417	.	C15orf52
cg07347148	Up_In_A2	chr1	167786801	167786803	.	ADCY10
cg07348845	Up_In_A2	chr1	227544539	227544541	.	BC039356
cg07349815	Up_In_A2	chr3	123751268	123751270	.	KALRN
cg07357279	Up_In_A2	chr17	43318734	43318736	.	FMNL1
cg07359183	Up_In_A2	chr1	208358017	208358019	.	PLXNA2
cg07363657	Up_In_A2	chr1	61333616	61333618	.	AK097193
cg07368396	Up_In_A2	chr5	132945814	132945816	.	FSTL4
cg07371589	Up_In_A2	chr1	151104366	151104368	.	SEMA6C
cg07380907	Up_In_A2	chr16	11963778	11963780	.	GSPT1	RSL1D1
cg07385974	Up_In_A2	chr7	150074778	150074780	.	ZNF775
cg07394266	Up_In_A2	chr9	71155969	71155971	.	C9orf71
cg07395763	Up_In_A2	chr7	47574049	47574051	.	TNS3
cg07404514	Up_In_A2	chr6	31698743	31698745	.	DDAH2	CLIC1
cg07406728	Up_In_A2	chr5	114786953	114786955	.	FEM1C
cg07409629	Up_In_A2	chr2	144282742	144282744	.	ARHGAP15
cg07412186	Up_In_A2	chr6	16719375	16719377	.	ATXN1
cg07416885	Up_In_A2	chr6	170426111	170426113	.	LOC154449
cg07416916	Up_In_A2	chr2	36825887	36825889	.	FEZ2
cg07443717	Up_In_A2	chr3	129383356	129383358	.	TMCC1
cg07456201	Up_In_A2	chr16	20363710	20363712	.	UMOD
cg07459478	Up_In_A2	chr7	55589802	55589804	.	VOPP1
cg07466463	Up_In_A2	chr8	141574206	141574208	.	EIF2C2	DQ574852
cg07468289	Up_In_A2	chr6	30030009	30030011	.	NCRNA00171	ZNRD1	ZNRD1-AS1
cg07468956	Up_In_A2	chr17	80289700	80289702	.	SECTM1
cg07472196	Up_In_A2	chr3	99801502	99801504	.	FILIP1L	C3orf26
cg07474269	Up_In_A2	chr5	166722512	166722514	.	ODZ2
cg07481027	Up_In_A2	chr10	75631587	75631589	.	CAMK2G
cg07510175	Up_In_A2	chr7	1030699	1030701	.	CYP2W1
cg07522403	Up_In_A2	chr7	66105983	66105985	.	KCTD7	RABGEF1
cg07523043	Up_In_A2	chr6	30175298	30175300	.	TRIM26
cg07526042	Up_In_A2	chr12	94543679	94543681	.	PLXNC1
cg07529241	Up_In_A2	chr12	133189334	133189336	.	LOC100507055
cg07529428	Up_In_A2	chr12	15717515	15717517	.	PTPRO
cg07530947	Up_In_A2	chr13	46041746	46041748	.	COG3
cg07535740	Up_In_A2	chr19	5915493	5915495	.	CAPS
cg07538160	Up_In_A2	chr6	30951393	30951395	.	MUC21
cg07538890	Up_In_A2	chr3	171913082	171913084	.	FNDC3B
cg07539045	Up_In_A2	chr6	43245570	43245572	.	TTBK1
cg07540629	Up_In_A2	chr19	46277810	46277812	.	DMPK
cg07567376	Up_In_A2	chr10	60271504	60271506	.	BICC1
cg07574163	Up_In_A2	chr14	77498975	77498977	.	IRF2BPL
cg07574683	Up_In_A2	chr11	134585269	134585271	.	AK125040
cg07576931	Up_In_A2	chr8	117530080	117530082	.	EIF3H
cg07577121	Up_In_A2	chr3	31207055	31207057	.	GADL1
cg07581623	Up_In_A2	chr8	26498829	26498831	.	DPYSL2
cg07588439	Up_In_A2	chr2	198571553	198571555	.	MARS2
cg07594954	Up_In_A2	chr3	132990607	132990609	.	TMEM108	BC037929
cg07595134	Up_In_A2	chr19	2278707	2278709	.	C19orf35
cg07595906	Up_In_A2	chr16	1185984	1185986	.	CACNA1H
cg07600170	Up_In_A2	chr10	134064226	134064228	.	STK32C
cg07603685	Up_In_A2	chr1	43158096	43158098	.	YBX1
cg07617759	Up_In_A2	chr2	33050474	33050476	.	LOC285045	LINC00486
cg07619672	Up_In_A2	chr15	64338027	64338029	.	DAPK2
cg07647179	Up_In_A2	chr11	1078955	1078957	.	MUC2
cg07650391	Up_In_A2	chr7	41733447	41733449	.	INHBA	LOC285954
cg07652854	Up_In_A2	chr7	80551730	80551732	.	SEMA3C
cg07654588	Up_In_A2	chr3	17782210	17782212	.	TBC1D5
cg07657463	Up_In_A2	chr4	40753246	40753248	.	NSUN7
cg07658280	Up_In_A2	chr8	145728489	145728491	.	GPT
cg07658449	Up_In_A2	chr12	111725166	111725168	.	CUX2	FAM109A
cg07663572	Up_In_A2	chr12	51014371	51014373	.	DIP2B
cg07670736	Up_In_A2	chr1	95537845	95537847	.	ALG14
cg07684775	Up_In_A2	chr12	54772687	54772689	.	ZNF385A
cg07689252	Up_In_A2	chr2	242714015	242714017	.	GAL3ST2
cg07691146	Up_In_A2	chr13	51797645	51797647	.	FAM124A
cg07699648	Up_In_A2	chr6	32974478	32974480	.	HLA-DOA
cg07704981	Up_In_A2	chr17	26127536	26127538	.	NOS2
cg07723902	Up_In_A2	chr12	42987805	42987807	.	PRICKLE1
cg07725836	Up_In_A2	chr1	110007629	110007631	.	SYPL2
cg07734975	Up_In_A2	chr11	9780843	9780845	.	LOC440028
cg07737131	Up_In_A2	chr5	52319149	52319151	.	ITGA2
cg07737135	Up_In_A2	chr19	1356031	1356033	.	MUM1
cg07739826	Up_In_A2	chr11	59378926	59378928	.	OSBP
cg07740599	Up_In_A2	chr16	524856	524858	.	RAB11FIP3
cg07745671	Up_In_A2	chr3	177272847	177272849	.	AK056252
cg07747924	Up_In_A2	chr16	78233494	78233496	.	WWOX
cg07749951	Up_In_A2	chr16	79352435	79352437	.	MAF
cg07762788	Up_In_A2	chr16	68833305	68833307	.	CDH1	TMCO7
cg07763737	Up_In_A2	chr15	74956219	74956221	.	EDC3
cg07773434	Up_In_A2	chr11	64015288	64015290	.	PPP1R14B
cg07773597	Up_In_A2	chr11	131793368	131793370	.	NTM
cg07774251	Up_In_A2	chr11	108408980	108408982	.	EXPH5
cg07776130	Up_In_A2	chr10	115942217	115942219	.	TDRD1
cg07778290	Up_In_A2	chr12	6325047	6325049	.	CD9
cg07784166	Up_In_A2	chr5	74172352	74172354	.	FAM169A
cg07786301	Up_In_A2	chr16	56246204	56246206	.	GNAO1	DKFZP434H168
cg07790176	Up_In_A2	chr13	92601292	92601294	.	GPC5	Y_RNA
cg07790870	Up_In_A2	chr20	32150310	32150312	.	CBFA2T2
cg07796597	Up_In_A2	chr10	11379738	11379740	.	AF007147
cg07804621	Up_In_A2	chr5	107722228	107722230	.	FBXL17
cg07810733	Up_In_A2	chr12	66324091	66324093	.	HMGA2	AK128707
cg07814661	Up_In_A2	chr11	74154542	74154544	.	KCNE3
cg07836225	Up_In_A2	chr1	235665821	235665823	.	B3GALNT2
cg07838943	Up_In_A2	chr1	12493839	12493841	.	VPS13D
cg07849811	Up_In_A2	chr3	19740601	19740603	.	EFHB
cg07871313	Up_In_A2	chr6	21664166	21664168	.	LINC00340
cg07876823	Up_In_A2	chr6	164392554	164392556	.	AK093114
cg07880190	Up_In_A2	chr5	5521759	5521761	.	KIAA0947
cg07881496	Up_In_A2	chr3	105733167	105733169	.	CBLB
cg07881817	Up_In_A2	chr3	170904869	170904871	.	TNIK	MIR569
cg07882863	Up_In_A2	chr6	132858437	132858439	.	TAAR9
cg07886472	Up_In_A2	chr13	112054946	112054948	.	C13orf16
cg07893801	Up_In_A2	chr20	39767357	39767359	.	PLCG1	BC035080
cg07896068	Up_In_A2	chr2	161056599	161056601	.	ITGB6
cg07902673	Up_In_A2	chr1	87793395	87793397	.	LMO4
cg07906745	Up_In_A2	chr1	109639151	109639153	.	TMEM167B	SCARNA2
cg07906828	Up_In_A2	chr1	2782966	2782968	.	TTC34
cg07910075	Up_In_A2	chr1	153581493	153581495	.	S100A16
cg07913153	Up_In_A2	chr1	236680760	236680762	.	LGALS8
cg07917546	Up_In_A2	chr16	86496222	86496224	.	LOC400550
cg07918814	Up_In_A2	chr1	230882480	230882482	.	CAPN9
cg07921314	Up_In_A2	chr7	129253168	129253170	.	NRF1
cg07922843	Up_In_A2	chr1	92083172	92083174	.	HSP90B3P
cg07942920	Up_In_A2	chr4	38013268	38013270	.	TBC1D1
cg07943832	Up_In_A2	chr6	155568917	155568919	.	TIAM2	AB075492
cg07945618	Up_In_A2	chr15	99926397	99926399	.	LRRC28
cg07947930	Up_In_A2	chr1	203444944	203444946	.	PRELP
cg07959070	Up_In_A2	chr22	50026187	50026189	.	C22orf34
cg07959747	Up_In_A2	chr10	82050671	82050673	.	MAT1A
cg07973479	Up_In_A2	chr13	25945254	25945256	.	ATP8A2
cg07977713	Up_In_A2	chr1	43814168	43814170	.	MPL	CDC20
cg07986666	Up_In_A2	chr12	53298382	53298384	.	KRT8
cg07991704	Up_In_A2	chr4	72096972	72096974	.	SLC4A4
cg07992196	Up_In_A2	chr4	124671518	124671520	.	LOC285419
cg07992659	Up_In_A2	chr7	33961366	33961368	.	BMPER
cg07995893	Up_In_A2	chr7	104650932	104650934	.	LOC100216545
cg07997634	Up_In_A2	chr7	95818281	95818283	.	SLC25A13	MIR591
cg07999732	Up_In_A2	chr7	150080841	150080843	.	ZNF775
cg07999988	Up_In_A2	chr1	201625498	201625500	.	NAV1
cg08005093	Up_In_A2	chr17	63532897	63532899	.	AXIN2
cg08008475	Up_In_A2	chr13	27977778	27977780	.	GTF3A
cg08011645	Up_In_A2	chr11	64488700	64488702	.	NRXN2
cg08012275	Up_In_A2	chr11	1464299	1464301	.	BRSK2
cg08023276	Up_In_A2	chr2	201388624	201388626	.	SGOL2
cg08026651	Up_In_A2	chr2	84743141	84743143	.	DNAH6
cg08030625	Up_In_A2	chr16	21244897	21244899	.	ANKS4B
cg08030922	Up_In_A2	chr4	90675035	90675037	.	SNCA	DQ571524
cg08031769	Up_In_A2	chr3	41042968	41042970	.	CTNNB1
cg08038741	Up_In_A2	chr14	104061869	104061871	.	KLC1
cg08050663	Up_In_A2	chr14	77725700	77725702	.	TMEM63C	MIR1260A
cg08058988	Up_In_A2	chr3	46621935	46621937	.	TDGF1	LRRC2
cg08066024	Up_In_A2	chr2	51057547	51057549	.	NRXN1
cg08070476	Up_In_A2	chr7	16887411	16887413	.	AGR3
cg08071719	Up_In_A2	chr13	113650154	113650156	.	MCF2L
cg08075024	Up_In_A2	chr2	182761448	182761450	.	SSFA2
cg08079376	Up_In_A2	chr16	65700025	65700027	.	LOC283867
cg08085853	Up_In_A2	chr7	33793735	33793737	.	AK225487
cg08089449	Up_In_A2	chr11	9384822	9384824	.	IPO7
cg08090385	Up_In_A2	chr1	1099582	1099584	.	MIR200B
cg08093568	Up_In_A2	chr7	27626594	27626596	.	HIBADH	TSL-A
cg08093959	Up_In_A2	chr2	106959852	106959854	.	PLGLA
cg08096854	Up_In_A2	chr17	48617636	48617638	.	EPN3	SPATA20
cg08100149	Up_In_A2	chr15	31198302	31198304	.	MTMR15	FAN1
cg08107394	Up_In_A2	chr16	30049096	30049098	.	AK097527
cg08115297	Up_In_A2	chr15	84706832	84706834	.	ADAMTSL3	LOC648809
cg08119655	Up_In_A2	chr11	7595924	7595926	.	PPFIBP2
cg08123067	Up_In_A2	chr17	81047182	81047184	.	METRNL
cg08124030	Up_In_A2	chr3	149095282	149095284	.	TM4SF1
cg08124461	Up_In_A2	chr15	57818970	57818972	.	CGNL1	AL110171
cg08125291	Up_In_A2	chr13	44588185	44588187	.	LINC00284
cg08135406	Up_In_A2	chr3	23785034	23785036	.	UBE2E1
cg08141518	Up_In_A2	chrX	133680973	133680975	.	MIR424	MGC16121	MIR503
cg08147813	Up_In_A2	chr6	17102935	17102937	.	FLJ23152
cg08156867	Up_In_A2	chr16	3870329	3870331	.	CREBBP
cg08158518	Up_In_A2	chr3	140866588	140866590	.	SPSB4
cg08168585	Up_In_A2	chr16	50276771	50276773	.	ADCY7
cg08169341	Up_In_A2	chr8	48437851	48437853	.	KIAA0146
cg08171142	Up_In_A2	chr6	53013941	53013943	.	GCM1
cg08172479	Up_In_A2	chr16	16951652	16951654	.	NPIP
cg08180572	Up_In_A2	chr16	28985142	28985144	.	SPNS1
cg08188015	Up_In_A2	chr6	32489552	32489554	.	HLA-DRB5
cg08193082	Up_In_A2	chr7	39018177	39018179	.	POU6F2
cg08196608	Up_In_A2	chr17	1807839	1807841	.	RPA1
cg08198470	Up_In_A2	chr17	1801636	1801638	.	RPA1
cg08199758	Up_In_A2	chr16	3062425	3062427	.	CLDN9
cg08203210	Up_In_A2	chr6	26153216	26153218	.	HIST1H1E
cg08205865	Up_In_A2	chr1	167883378	167883380	.	ADCY10
cg08207253	Up_In_A2	chr13	41496978	41496980	.	SUGT1L1	LOC100616668
cg08214142	Up_In_A2	chr12	56623825	56623827	.	SLC39A5
cg08217545	Up_In_A2	chr19	3388012	3388014	.	NFIC
cg08219773	Up_In_A2	chr3	19975737	19975739	.	EFHB
cg08222053	Up_In_A2	chr12	56113433	56113435	.	RDH5	BLOC1S1
cg08223717	Up_In_A2	chr7	36195506	36195508	.	EEPD1
cg08237220	Up_In_A2	chr3	156332966	156332968	.	TIPARP
cg08238865	Up_In_A2	chrX	84634592	84634594	.	POF1B
cg08261841	Up_In_A2	chr7	142982462	142982464	.	TMEM139
cg08264481	Up_In_A2	chr5	38317101	38317103	.	EGFLAM
cg08271443	Up_In_A2	chr16	4845347	4845349	.	LOC440335
cg08272268	Up_In_A2	chr1	200380058	200380060	.	ZNF281	EU250746
cg08284496	Up_In_A2	chr17	37894026	37894028	.	GRB7
cg08285677	Up_In_A2	chr15	71371826	71371828	.	CT62
cg08293002	Up_In_A2	chr11	65246589	65246591	.	MALAT1
cg08293777	Up_In_A2	chr16	57218990	57218992	.	RSPRY1	FAM192A
cg08294336	Up_In_A2	chr17	80972355	80972357	.	B3GNTL1
cg08295639	Up_In_A2	chr5	169532757	169532759	.	FOXI1
cg08303283	Up_In_A2	chr9	139843752	139843754	.	LCN12
cg08305453	Up_In_A2	chr10	17181910	17181912	.	Mir_384
cg08311343	Up_In_A2	chr7	92324860	92324862	.	CDK6	FAM133B
cg08318371	Up_In_A2	chr2	162881134	162881136	.	DPP4
cg08325842	Up_In_A2	chr11	58361663	58361665	.	ZFP91-CNTF	ZFP91
cg08326019	Up_In_A2	chr19	11472260	11472262	.	LPPR2	Prion_pknot
cg08327367	Up_In_A2	chr11	46934662	46934664	.	LRP4
cg08327394	Up_In_A2	chr10	101315114	101315116	.	NKX2-3
cg08329754	Up_In_A2	chr17	78797014	78797016	.	RPTOR
cg08332908	Up_In_A2	chr17	38465325	38465327	.	RARA
cg08333011	Up_In_A2	chr17	42057235	42057237	.	PYY
cg08342194	Up_In_A2	chr6	31683074	31683076	.	LY6G6D	LY6G6E
cg08354351	Up_In_A2	chr6	96461708	96461710	.	FUT9
cg08357627	Up_In_A2	chr11	132949125	132949127	.	OPCML
cg08364970	Up_In_A2	chr16	88476143	88476145	.	ZNF469
cg08367801	Up_In_A2	chr5	98111528	98111530	.	RGMB	FLJ35946
cg08370787	Up_In_A2	chr5	148208040	148208042	.	ADRB2
cg08373573	Up_In_A2	chr11	1028290	1028292	.	MUC6
cg08379738	Up_In_A2	chr19	6477032	6477034	.	DENND1C
cg08381046	Up_In_A2	chr5	112294314	112294316	.	DCP2
cg08407014	Up_In_A2	chr19	2541103	2541105	.	GNG7	GADD45B
cg08411235	Up_In_A2	chr11	35297025	35297027	.	SLC1A2	CD44
cg08412316	Up_In_A2	chr11	95658468	95658470	.	MTMR2
cg08415731	Up_In_A2	chr6	18273502	18273504	.	DEK
cg08421768	Up_In_A2	chr4	123797143	123797145	.	FGF2	NUDT6
cg08425810	Up_In_A2	chr12	58132557	58132559	.	AGAP2
cg08426898	Up_In_A2	chr2	174916730	174916732	.	SP3
cg08427067	Up_In_A2	chr11	95015465	95015467	.	SESN3
cg08432204	Up_In_A2	chr6	126235515	126235517	.	NCOA7
cg08436089	Up_In_A2	chr19	45594492	45594494	.	GEMIN7
cg08441803	Up_In_A2	chr17	46388389	46388391	.	SKAP1
cg08443357	Up_In_A2	chr20	1309999	1310001	.	SDCBP2
cg08444833	Up_In_A2	chr8	141574161	141574163	.	EIF2C2	DQ574852
cg08452456	Up_In_A2	chr17	45786438	45786440	.	TBKBP1
cg08461097	Up_In_A2	chr19	2065101	2065103	.	MOB3A
cg08466082	Up_In_A2	chr16	88551421	88551423	.	ZFPM1
cg08468599	Up_In_A2	chr1	2182125	2182127	.	SKI
cg08469215	Up_In_A2	chr1	156261350	156261352	.	TMEM79	AF086351
cg08477158	Up_In_A2	chr17	58807666	58807668	.	BCAS3
cg08482167	Up_In_A2	chr6	144066846	144066848	.	PHACTR2
cg08482307	Up_In_A2	chr5	14728683	14728685	.	ANKH	FAM105B
cg08485937	Up_In_A2	chr3	52488036	52488038	.	NISCH	TNNC1
cg08488615	Up_In_A2	chr16	29263124	29263126	.	RUNDC2C
cg08491363	Up_In_A2	chr10	101087756	101087758	.	CNNM1
cg08495617	Up_In_A2	chr3	171791142	171791144	.	FNDC3B
cg08497487	Up_In_A2	chr6	30042187	30042189	.	RNF39
cg08498747	Up_In_A2	chr17	41747668	41747670	.	MEOX1
cg08500704	Up_In_A2	chr6	100060452	100060454	.	PRDM13
cg08508936	Up_In_A2	chr5	146768007	146768009	.	DPYSL3
cg08509927	Up_In_A2	chr4	5976062	5976064	.	C4orf50	FLJ46481
cg08509991	Up_In_A2	chr10	105845719	105845721	.	COL17A1
cg08528486	Up_In_A2	chr13	113648766	113648768	.	MCF2L
cg08532862	Up_In_A2	chr5	171997456	171997458	.	NEURL1B
cg08532914	Up_In_A2	chr3	11763044	11763046	.	VGLL4
cg08537660	Up_In_A2	chr11	12699660	12699662	.	TEAD1
cg08549216	Up_In_A2	chr16	31142522	31142524	.	MYST1	KAT8
cg08560888	Up_In_A2	chr11	2191081	2191083	.	TH
cg08567913	Up_In_A2	chr11	114082593	114082595	.	ZBTB16	NNMT
cg08570346	Up_In_A2	chr5	82117655	82117657	.	MIR3977
cg08573435	Up_In_A2	chr7	1398115	1398117	.	MICALL2
cg08574915	Up_In_A2	chr17	79924771	79924773	.	NOTUM
cg08580014	Up_In_A2	chr10	118368633	118368635	.	PNLIPRP1	PNLIPRP2
cg08584665	Up_In_A2	chr7	23471812	23471814	.	IGF2BP3	SNORD65
cg08591668	Up_In_A2	chr11	94150724	94150726	.	MRE11A	GPR83
cg08595806	Up_In_A2	chr6	160512463	160512465	.	IGF2R	LOC729603
cg08597799	Up_In_A2	chr8	1982914	1982916	.	MYOM2
cg08599635	Up_In_A2	chr16	78496507	78496509	.	WWOX
cg08603125	Up_In_A2	chr6	35890196	35890198	.	SRPK1
cg08608240	Up_In_A2	chr16	1080807	1080809	.	SSTR5
cg08616951	Up_In_A2	chr11	394544	394546	.	PKP3
cg08625996	Up_In_A2	chr7	127547489	127547491	.	SND1	SND1-IT1
cg08628580	Up_In_A2	chr11	58954090	58954092	.	DTX4
cg08629856	Up_In_A2	chr10	132913152	132913154	.	TCERG1L
cg08631783	Up_In_A2	chr15	89418455	89418457	.	ACAN	L12234
cg08643131	Up_In_A2	chr19	1356149	1356151	.	MUM1
cg08644973	Up_In_A2	chr6	31668720	31668722	.	BAT5	MIR4646
cg08650961	Up_In_A2	chr10	104748593	104748595	.	CNNM2
cg08655871	Up_In_A2	chr4	79971407	79971409	.	LOC100505875
cg08655953	Up_In_A2	chr1	2425887	2425889	.	PLCH2
cg08677657	Up_In_A2	chr6	149885005	149885007	.	C6orf72
cg08684581	Up_In_A2	chr4	93309638	93309640	.	GRID2
cg08688169	Up_In_A2	chr12	121570080	121570082	.	P2RX7
cg08700707	Up_In_A2	chr16	809678	809680	.	MSLN
cg08705329	Up_In_A2	chr17	40931587	40931589	.	WNK4	VPS25
cg08705382	Up_In_A2	chr1	230322023	230322025	.	GALNT2
cg08715862	Up_In_A2	chr16	67275027	67275029	.	FHOD1
cg08726417	Up_In_A2	chr20	30407015	30407017	.	MYLK2
cg08731696	Up_In_A2	chr1	59280488	59280490	.	LOC100131060
cg08738571	Up_In_A2	chr12	32655191	32655193	.	FGD4
cg08745665	Up_In_A2	chr4	10460008	10460010	.	ZNF518B
cg08749443	Up_In_A2	chr15	90224097	90224099	.	PLIN1
cg08754004	Up_In_A2	chr6	134775464	134775466	.	LOC154092
cg08758185	Up_In_A2	chr5	150849935	150849937	.	SLC36A1
cg08759041	Up_In_A2	chr5	112824613	112824615	.	MCC
cg08763617	Up_In_A2	chr6	138183962	138183964	.	TNFAIP3
cg08767838	Up_In_A2	chr20	62209641	62209643	.	PRIC285
cg08771694	Up_In_A2	chr2	228498940	228498942	.	C2orf83
cg08774104	Up_In_A2	chr2	168854863	168854865	.	STK39	B3GALT1
[truncated: 5,345 more rows]
[truncated: 16 more columns]
