# Supplementary material for: Integrative multi-omics analysis identified FUT9 and MS4A3 as novel immune-phenotype and prognosis biomarkers for colorectal cancer and analyze the role of FUT9 in oncoimmunology
Source: Research Square preprint supplement (doi:10.21203/rs.3.rs-8306096/v1), 2025-12-09
Supplement: Supplementary file 2 [file 67d4a520a5d2a5f432670440.xlsx]

## Sheet: Supplementary Table 2
chr	start	end	length	type	pvalue	qvalue
chr11	50055331	56013797	5958468	Loss	0.0074303	0.1095
chr2	89130754	95341699	6210947	Gain	0.0496022	0.214
chr16	14747103	18808402	4061301	Loss	0.0413305	0.282
chr18	14660483	18689746	4029265	Loss	0.0289409	0.3115
chr20	26197900	29843972	3646074	Gain	0.00403922	0.509
chr7	18224545	21523664	3299121	Gain	0.0151315	0.518
chr18	69049159	71367031	2317874	Loss	0.00109434	0.5245
chr3	90485963	93734670	3248709	Gain	0.0234456	0.546
chr3	117803575	120516491	2712918	Gain	0.0208064	0.5795
chr2	124187767	126480332	2292567	Gain	0.0496022	0.6165
chr3	138797737	141022486	2224751	Gain	0.0013101	0.6255
chr9	75827662	78027654	2199994	Gain	0.0295474	0.6405
chr1	197388241	199582236	2193997	Gain	0.011649	0.661
chr11	101424671	103318440	1893771	Loss	0.00127277	0.666
chr2	174182310	176289435	2107127	Gain	0.0246357	0.6945
chr3	145557031	147576012	2018983	Gain	0.0013101	0.702
chr2	194668866	196646787	1977923	Gain	0.0246357	0.704
chr1	151062312	153031565	1969255	Gain	0.0458959	0.709
chr1	193482495	195387587	1905094	Gain	0.011649	0.726
chr2	83424149	85332418	1908271	Gain	0.049089	0.726
chr3	160965864	162764071	1798209	Gain	0.0013101	0.7355
chr2	108540267	110368569	1828304	Gain	0.0496022	0.7355
chr11	34970172	36633856	1663686	Loss	0.0208064	0.7445
chr1	184131754	185900496	1768744	Gain	0.0207575	0.746
chr22	22190283	23816387	1626106	Loss	0.0480913	0.7465
chr2	114525984	116262042	1736060	Gain	0.0496022	0.754
chr2	210033551	211711551	1678002	Gain	0.0198618	0.7885
chr3	181455520	183125664	1670146	Gain	0.000732976	0.794
chr10	105229748	106719838	1490092	Loss	0.0458959	0.7995
chr9	121839797	123477728	1637933	Gain	0.0109391	0.8055
chr1	169787276	171411047	1623773	Gain	0.0207575	0.8065
chr1	172508727	174054077	1545352	Gain	0.0207575	0.8155
chr3	184475834	185988486	1512654	Gain	0.000732976	0.838
chr11	118999705	120405436	1405733	Loss	0.000708023	0.839
chr7	16735586	18219540	1483956	Gain	0.0151315	0.8425
chr2	176289436	177760683	1471249	Gain	0.0246357	0.8425
chr3	132566768	134027606	1460840	Gain	0.0023226	0.844
chr11	109279968	110657110	1377144	Loss	0.000708023	0.8475
chr11	93683256	95038256	1355002	Loss	0.00127277	0.8515
chr3	179776202	181227786	1451586	Gain	0.000732976	0.853
chr1	218142819	219591132	1448315	Gain	0.00744067	0.8545
chr2	87055250	88493100	1437852	Gain	0.049089	0.8565
chr3	158127370	159554844	1427476	Gain	0.0013101	0.8675
chr1	189960864	191382511	1421649	Gain	0.011649	0.8675
chr1	159124442	160535845	1411405	Gain	0.0207575	0.868
chr11	47733390	49042688	1309300	Loss	0.0074303	0.8695
chr2	162333112	163744364	1411254	Gain	0.00961489	0.8695
chr11	130270231	131566592	1296363	Loss	0.000406968	0.876
chr13	50223520	51624281	1400763	Gain	0.0102245	0.876
chr9	78029204	79424168	1394966	Gain	0.0295474	0.878
chr11	127731320	129018337	1287019	Loss	0.00022433	0.88
chr11	103608043	104853392	1245351	Loss	0.00127277	0.8825
chr3	169376290	170750057	1373769	Gain	0.0013101	0.883
chr5	145298563	146537030	1238469	Loss	0.0409856	0.8835
chr3	122940956	124313603	1372649	Gain	0.0122297	0.8835
chr9	94275403	95640144	1364743	Gain	0.0109391	0.8855
chr7	8065111	9428507	1363398	Gain	0.0218635	0.8855
chr3	183125665	184475339	1349676	Gain	0.000732976	0.888
chr3	59705136	61026350	1321216	Gain	0.0325174	0.8935
chr3	163728579	165021836	1293259	Gain	0.0013101	0.8975
chr2	192279057	193569240	1290185	Gain	0.0246357	0.8975
chr1	160668690	161937623	1268935	Gain	0.0207575	0.8975
chr2	178040695	179294943	1254250	Gain	0.0123434	0.899
chr2	204590336	205840114	1249780	Gain	0.0198618	0.899
chr2	165864050	167105771	1241723	Gain	0.00961489	0.9
chr3	155242118	156464050	1221934	Gain	0.0013101	0.9065
chr18	55996313	57137074	1140763	Loss	0.000555643	0.907
chr9	86680675	87896172	1215499	Gain	0.0295474	0.9075
chr2	142914297	144124091	1209796	Gain	0.049089	0.908
chr13	79330093	80543901	1213810	Gain	0.00684491	0.908
chr1	211834028	213037243	1203217	Gain	0.00616225	0.9085
chr9	101671656	102853878	1182224	Gain	0.0040814	0.9105
chr9	104163007	105328165	1165160	Gain	0.0040814	0.911
chr2	182139509	183301778	1162271	Gain	0.0123434	0.911
chr3	171015828	172177696	1161870	Gain	0.0013101	0.911
chr2	95737679	96895631	1157954	Gain	0.0314804	0.9115
chr1	155157071	156304328	1147259	Gain	0.0458959	0.9135
chr3	151041514	152190320	1148808	Gain	0.0013101	0.9135
chr2	153889620	155015747	1126129	Gain	0.0155531	0.9155
chr7	12552159	13674145	1121988	Gain	0.0151315	0.917
chr1	202806240	203928375	1122137	Gain	0.00744067	0.917
chr3	186868325	187973478	1105155	Gain	0.000732976	0.9175
chr2	104250237	105363172	1112937	Gain	0.0496022	0.9175
chr3	153539540	154621683	1082145	Gain	0.0013101	0.9185
chr3	121695697	122780412	1084717	Gain	0.0208064	0.9185
chr5	141475367	142557088	1081723	Gain	0.0413305	0.9195
chr8	5120503	6207718	1087217	Loss	0.0429035	0.9205
chr11	64592909	65670509	1077602	Loss	6.22e-05	0.921
chr9	116389290	117454582	1065294	Gain	0.0040814	0.9225
chr2	183304777	184368603	1063828	Gain	0.0123434	0.9225
chr11	121487347	122550372	1063027	Loss	0.00127277	0.9235
chr2	150793156	151854710	1061556	Gain	0.0155531	0.925
chr9	85452950	86514454	1061506	Gain	0.0295474	0.925
chr2	126480969	127519028	1038061	Gain	0.0496022	0.9265
chr2	200643495	201681614	1038121	Gain	0.0246357	0.9265
chr1	196032100	197072294	1040196	Gain	0.011649	0.9265
chr2	133700310	134735132	1034824	Gain	0.0496022	0.927
chr11	3442540	4470939	1028401	Loss	0.0295474	0.927
chr11	36669982	37665649	995669	Loss	0.0208064	0.929
chr1	227180859	228202192	1021335	Gain	0.0310969	0.929
chr2	219513547	220531768	1018223	Gain	0.0198618	0.929
chr11	123953621	124947149	993530	Loss	0.00127277	0.93
chr1	181347060	182362834	1015776	Gain	0.011649	0.93
chr2	156580730	157597363	1016635	Gain	0.0155531	0.93
chr2	197741266	198758700	1017436	Gain	0.015695	0.93
chr2	112453293	113454512	1001221	Gain	0.0496022	0.932
chr2	148934282	149934099	999819	Gain	0.0155531	0.932
chr9	96425864	97415717	989855	Gain	0.0109391	0.932
chr3	58123250	59118977	995729	Gain	0.0325174	0.932
chr11	42581290	43553885	972597	Loss	0.0349244	0.933
chr17	31958182	32943642	985462	Gain	0.0353679	0.936
chr11	92388934	93309193	920261	Loss	0.00127277	0.9375
chr2	110425137	111400661	975526	Gain	0.0496022	0.94
chr8	11648590	12562454	913866	Loss	0.0226715	0.94
chr11	107049000	107962204	913206	Loss	0.000708023	0.94
chr2	222471517	223443760	972245	Gain	0.0198618	0.9405
chr3	194177323	195143852	966531	Gain	0.000732976	0.941
chr2	202527578	203484554	956978	Gain	0.0198618	0.942
chr3	193076941	194034535	957596	Gain	0.000732976	0.942
chr3	196020885	196974182	953299	Gain	0.000188269	0.9425
chr3	134036421	134986213	949794	Gain	0.0023226	0.9425
chr9	108128891	109076498	947609	Gain	0.0040814	0.943
chr11	105373498	106268454	894958	Loss	0.000708023	0.9445
chr2	218458030	219393414	935386	Gain	0.0198618	0.946
chr9	84521499	85451415	929918	Gain	0.0295474	0.9475
chr2	117352830	118281135	928307	Gain	0.0496022	0.9475
chr5	128881176	129771299	890125	Loss	0.0404556	0.9475
chr5	143569148	144493186	924040	Gain	0.0413305	0.948
chr3	177863023	178783926	920905	Gain	0.000732976	0.948
chr2	139763080	140682645	919567	Gain	0.049089	0.948
chr1	156855796	157767307	911513	Gain	0.0458959	0.9495
chr2	111536213	112442244	906033	Gain	0.0496022	0.95
chr3	128110771	129017361	906592	Gain	0.0040814	0.95
chr9	132785906	133682926	897022	Gain	0.018092	0.953
chr1	199598643	200499862	901221	Gain	0.00744067	0.953
chr5	137167985	138066767	898784	Gain	0.0413305	0.953
chr11	99914998	100785448	870452	Loss	0.00127277	0.955
chr2	184380171	185273127	892958	Gain	0.0123434	0.9565
chr1	225229074	226122736	893664	Gain	0.0136602	0.9565
chr3	131321323	132211993	890672	Gain	0.0023226	0.9565
chr5	128881176	129771299	890125	Gain	0.0413305	0.9565
chr2	107421536	108303729	882195	Gain	0.0496022	0.9575
chr2	85333407	86210170	876765	Gain	0.049089	0.9575
chr9	92821015	93693245	872232	Gain	0.018092	0.9575
chr2	101859142	102735705	876565	Gain	0.0496022	0.9575
chr3	152192282	153071321	879041	Gain	0.0013101	0.9575
chr1	246185981	247065432	879453	Gain	0.00744067	0.9575
chr13	60569376	61443526	874152	Gain	0.00450528	0.9575
chr1	175429374	176298496	869124	Gain	0.011649	0.9575
chr3	142391736	143269568	877834	Gain	0.0013101	0.9575
chr11	115137248	115988777	851531	Loss	0.000708023	0.958
chr9	109355028	110222879	867853	Gain	0.0040814	0.958
chr17	35207555	36075672	868119	Gain	0.0353679	0.958
chr7	10253687	11120085	866400	Gain	0.0218635	0.9585
chr5	135514217	136350717	836502	Loss	0.0466735	0.9585
chr2	173253944	174112526	858584	Gain	0.0246357	0.9585
chr13	44882689	45743919	861232	Gain	0.0216367	0.9585
chr2	212809954	213656186	846234	Gain	0.0198618	0.959
chr1	168727131	169572947	845818	Gain	0.0207575	0.959
chr2	216840453	217691214	850763	Gain	0.0198618	0.959
chr2	118288695	119143344	854651	Gain	0.0496022	0.959
chr5	135514217	136350717	836502	Gain	0.0413305	0.9595
chr3	130135440	130970621	835183	Gain	0.0040814	0.9595
chr3	148742939	149568747	825810	Gain	0.0013101	0.9605
chr2	116529288	117351115	821829	Gain	0.0496022	0.9605
chr2	224847341	225669004	821665	Gain	0.0314804	0.961
chr2	206785753	207603473	817722	Gain	0.038105	0.9615
chr2	96895632	97712441	816811	Gain	0.0314804	0.962
chr11	8237946	9044767	806823	Loss	0.047587	0.963
chr11	6610170	7399249	789081	Loss	0.0295474	0.963
chr3	129313490	130126549	813061	Gain	0.0040814	0.9635
chr9	135074450	135880468	806020	Gain	0.018092	0.9635
chr5	133432862	134235317	802457	Gain	0.0413305	0.964
chr1	208272037	209073906	801871	Gain	0.00616225	0.964
chr3	89505858	90307877	802021	Gain	0.0234456	0.964
chr11	112499832	113278482	778652	Loss	0.000708023	0.964
chr8	21959029	22731236	772209	Loss	0.0323419	0.9645
chr11	39073906	39840037	766133	Loss	0.0208064	0.965
chr1	240878202	241662139	783939	Gain	0.00744067	0.965
chr2	100456601	101241593	784994	Gain	0.049089	0.965
chr2	169753647	170548742	795097	Gain	0.0314804	0.965
chr13	55084386	55880522	796138	Gain	0.00685872	0.965
chr13	113379930	114175269	795341	Gain	0.0428052	0.965
chr11	131935275	132700778	765505	Loss	0.00022433	0.965
chr2	138280458	139069834	789378	Gain	0.049089	0.965
chr2	131633363	132429634	796273	Gain	0.0496022	0.965
chr2	121703624	122479138	775516	Gain	0.0496022	0.9655
chr13	64254857	65034144	779289	Gain	0.00684491	0.9655
chr2	113454513	114236564	782053	Gain	0.0496022	0.9655
chr2	216064151	216838931	774782	Gain	0.0198618	0.9655
chr2	215277797	216056176	778381	Gain	0.0198618	0.9655
chr9	820499	1602692	782195	Gain	0.038105	0.9655
chr13	36687733	37462040	774309	Gain	0.0306693	0.966
chr9	106354994	107122544	767552	Gain	0.00122455	0.9665
chr11	5540466	6304174	763710	Loss	0.0295474	0.9665
chr3	76895843	77665582	769741	Gain	0.0415716	0.9665
chr3	120821970	121585631	763663	Gain	0.0208064	0.9665
chr9	111718064	112484135	766073	Gain	0.0040814	0.9665
chr9	99242093	100005127	763036	Gain	0.0040814	0.9665
chr1	167526824	168290644	763822	Gain	0.0207575	0.9665
chr11	113904604	114658456	753854	Loss	0.000708023	0.967
chr5	139820850	140569690	748842	Gain	0.0413305	0.9675
chr2	145931407	146682046	750641	Gain	0.049089	0.9675
chr2	105391647	106146374	754729	Gain	0.0496022	0.9675
chr2	160983346	161739776	756432	Gain	0.00961489	0.9675
chr5	138946542	139705048	758508	Gain	0.0413305	0.9675
chr13	89344377	90092386	748011	Gain	0.0150632	0.9675
chr1	157767308	158511809	744503	Gain	0.0310969	0.968
chr13	88595858	89340429	744573	Gain	0.0150632	0.968
chr9	80679757	81420082	740327	Gain	0.0295474	0.968
chr2	188840221	189583595	743376	Gain	0.0123434	0.968
chr20	45623207	46361758	738553	Gain	0.000145464	0.9685
chr1	154081059	154810683	729626	Gain	0.0310969	0.969
chr3	172898728	173632870	734144	Gain	0.0013101	0.969
chr2	144125766	144857277	731513	Gain	0.049089	0.969
chr2	180209367	180940700	731335	Gain	0.0123434	0.969
chr9	136865612	137596452	730842	Gain	0.0392257	0.969
chr11	30082641	30832691	750052	Loss	0.047587	0.9695
chr1	215968463	216696488	728027	Gain	0.00744067	0.97
chr2	220567411	221289655	722246	Gain	0.0198618	0.97
chr1	186574022	187292608	718588	Gain	0.0207575	0.971
chr2	211711929	212426137	714210	Gain	0.0198618	0.9715
chr7	24311686	25014790	703106	Gain	0.0218635	0.9715
chr11	66066994	66804748	737756	Loss	0.00011479	0.9715
chr3	156733091	157437010	703921	Gain	0.0013101	0.9715
chr3	160209896	160925208	715314	Gain	0.0013101	0.9715
chr2	98495053	99202747	707696	Gain	0.049089	0.9715
chr2	157599186	158315629	716445	Gain	0.0155531	0.9715
chr3	134987361	135698621	711262	Gain	0.0023226	0.9715
chr9	105642463	106347911	705450	Gain	0.00122455	0.9715
chr3	88348461	89066062	717603	Gain	0.0234456	0.9715
chr13	66429052	67140466	711416	Gain	0.0102245	0.9715
chr2	82727009	83423902	696895	Gain	0.049089	0.972
chr3	136781712	137481509	699799	Gain	0.00653884	0.972
chr3	137488632	138177329	688699	Gain	0.00653884	0.9725
chr18	29055093	29783491	728400	Loss	0.00744782	0.9725
chr3	167626221	168308448	682229	Gain	0.0023226	0.9725
chr3	175078481	175759769	681290	Gain	0.0013101	0.9725
chr9	81994252	82666737	672487	Gain	0.0295474	0.9735
chr9	138707728	139381924	674198	Gain	0.0392257	0.9735
chr20	57295129	57966611	671484	Gain	0.000346926	0.9735
chr1	179081450	179748514	667066	Gain	0.0207575	0.9735
chr3	189232616	189896767	664153	Gain	0.000732976	0.974
chr9	131397479	132058298	660821	Gain	0.018092	0.974
chr9	110237855	110904736	666883	Gain	0.0040814	0.974
chr9	91013219	91658946	645729	Gain	0.018092	0.9745
chr1	220113201	220762523	649324	Gain	0.00744067	0.9745
chr2	120247912	120891075	643165	Gain	0.0496022	0.9745
chr3	190702924	191360970	658048	Gain	0.000732976	0.9745
chr3	159556112	160208548	652438	Gain	0.0013101	0.9745
chr1	165617973	166262027	644056	Gain	0.0310969	0.9745
chr2	122877065	123526387	649324	Gain	0.0496022	0.9745
chr13	62646732	63288936	642206	Gain	0.0102245	0.9745
chr11	89407981	90113344	705365	Loss	0.000708023	0.9745
chr9	37676900	38319792	642894	Gain	0.038105	0.9745
chr17	61624550	62279138	654590	Gain	0.0298204	0.9745
chr11	123229855	123939460	709607	Loss	0.00127277	0.9745
chr9	72896848	73544829	647983	Gain	0.047587	0.9745
chr18	57150992	57859562	708572	Loss	0.000555643	0.9745
chr5	140575600	141211946	636348	Gain	0.0413305	0.9755
chr2	147262168	147900546	638380	Gain	0.049089	0.9755
chr2	152466325	153099607	633284	Gain	0.0155531	0.9755
chr13	52721067	53353041	631976	Gain	0.00684222	0.9755
chr1	177145776	177766615	620841	Gain	0.0207575	0.976
chr9	97809581	98439239	629660	Gain	0.0109391	0.976
chr2	144989493	145619972	630481	Gain	0.049089	0.976
chr1	213672886	214301281	628397	Gain	0.00744067	0.976
chr9	132167953	132785905	617954	Gain	0.018092	0.976
chr2	191219274	191838204	618932	Gain	0.0246357	0.976
chr9	16226020	16847803	621785	Gain	0.0314804	0.976
chr3	166504047	167133798	629753	Gain	0.0023226	0.976
chr2	181536660	182139107	602449	Gain	0.0123434	0.9765
chr3	195143853	195746770	602919	Gain	0.000732976	0.9765
chr9	103452328	104049635	597309	Gain	0.0040814	0.9765
chr9	118642943	119246424	603483	Gain	0.0109391	0.9765
chr3	56813403	57421770	608369	Gain	0.0325174	0.9765
chr2	170757405	171356309	598906	Gain	0.0198618	0.9765
chr5	130429577	131029682	600107	Gain	0.0413305	0.9765
chr1	216966141	217567501	601362	Gain	0.00744067	0.9765
chr3	154628379	155241739	613362	Gain	0.0013101	0.9765
chr9	79668279	80266044	597767	Gain	0.0295474	0.9765
chr13	100583452	101178842	595392	Gain	0.0430045	0.9765
chr2	193967438	194569722	602286	Gain	0.0246357	0.9765
chr13	101202788	101801932	599146	Gain	0.0309077	0.9765
chr3	65699836	66298961	599127	Gain	0.0415716	0.9765
chr13	77410263	78011344	601083	Gain	0.00450528	0.9765
chr1	205609411	206198587	589178	Gain	0.00744067	0.9775
chr9	124076448	124664644	588198	Gain	0.0109391	0.9775
chr3	144475490	145065830	590342	Gain	0.0013101	0.9775
chr20	8085072	8679201	594131	Gain	0.0178397	0.9775
chr11	32571595	33248260	676667	Loss	0.0349244	0.9775
chr2	186297215	186889259	592046	Gain	0.0123434	0.9775
chr1	163510212	164099169	588959	Gain	0.0207575	0.9775
chr2	187643406	188230471	587067	Gain	0.0123434	0.978
chr1	237411940	237999970	588032	Gain	0.00189251	0.978
chr1	183562889	184131753	568866	Gain	0.0207575	0.979
chr3	141817744	142389384	571642	Gain	0.0013101	0.979
chr1	165045555	165617920	572367	Gain	0.0310969	0.979
chr1	242791788	243360467	568681	Gain	0.00744067	0.979
chr9	100978372	101562858	584488	Gain	0.0040814	0.979
chr2	97713774	98289838	576066	Gain	0.049089	0.979
chr2	155372611	155952669	580060	Gain	0.0155531	0.979
chr1	166579571	167156499	576930	Gain	0.0207575	0.979
chr20	44798391	45368154	569765	Gain	0.000297863	0.979
chr7	15172227	15743771	571546	Gain	0.0102944	0.979
chr2	161748917	162331259	582344	Gain	0.00961489	0.979
chr1	224204936	224789448	584514	Gain	0.0136602	0.979
chr1	244379433	244934551	555120	Gain	0.00744067	0.9795
chr3	56252604	56813142	560540	Gain	0.0325174	0.9795
chr7	6606603	7154900	548299	Gain	0.0218635	0.9795
chr7	23474325	24035127	560804	Gain	0.0151315	0.9795
chr9	81440464	81992885	552423	Gain	0.0295474	0.9795
chr2	136265353	136818718	553367	Gain	0.0496022	0.9795
chr17	29710352	30266928	556578	Gain	0.0279113	0.9795
chr1	217595165	218142129	546966	Gain	0.00744067	0.9795
chr7	21530104	22096915	566813	Gain	0.0151315	0.9795
chr2	217704719	218257642	552925	Gain	0.0198618	0.9795
chr17	33262383	33824902	562521	Gain	0.0235086	0.9795
chr9	112589454	113139029	549577	Gain	0.0040814	0.9795
chr13	32965730	33534282	568554	Gain	0.0216153	0.9795
chr1	153493801	154052275	558476	Gain	0.0458959	0.9795
chr3	179010270	179577887	567619	Gain	0.000732976	0.9795
chr3	163159979	163726357	566380	Gain	0.0013101	0.9795
chr18	54776258	55424509	648253	Loss	0.000328366	0.9795
chr7	5636712	6201258	564548	Gain	0.0151315	0.9795
chr7	2094341	2648886	554547	Gain	0.0230702	0.9795
chr1	187690537	188241206	550671	Gain	0.0207575	0.9795
chr1	226327069	226880930	553863	Gain	0.0207575	0.9795
chr3	124357903	124903656	545755	Gain	0.0122297	0.9795
chr11	116684768	117328100	643334	Loss	0.00127277	0.9795
chr18	5958902	6604604	645704	Loss	0.00233746	0.9795
chr9	1847506	2380734	533230	Gain	0.038105	0.98
chr5	170483193	171027070	543879	Gain	0.0230953	0.98
chr9	113254651	113796976	542327	Gain	0.0023226	0.98
chr3	186325802	186868324	542524	Gain	0.000732976	0.98
chr1	221580870	222112397	531529	Gain	0.00744067	0.98
chr1	183023696	183561724	538030	Gain	0.0207575	0.98
chr2	203485097	204021436	536341	Gain	0.0198618	0.98
chr9	139435384	139978618	543236	Gain	0.0392257	0.98
chr2	121161402	121703132	541732	Gain	0.0496022	0.98
chr9	134536696	135073966	537272	Gain	0.018092	0.98
chr2	158977147	159519368	542223	Gain	0.0155531	0.98
chr1	215415384	215949579	534197	Gain	0.00744067	0.98
chr17	60695996	61239327	543333	Gain	0.0298204	0.98
chr5	176776653	177415207	638556	Loss	0.0484222	0.9805
chr1	176310498	176840058	529562	Gain	0.011649	0.9805
chr9	129446592	129967440	520850	Gain	0.018092	0.981
chr9	83863270	84380738	517470	Gain	0.0295474	0.981
chr2	99403795	99928334	524541	Gain	0.049089	0.981
chr9	74355186	74875829	520645	Gain	0.0295474	0.981
chr1	236203281	236730679	527400	Gain	0.00189251	0.981
chr3	150496092	151022566	526476	Gain	0.0013101	0.981
chr3	157441618	157960299	518683	Gain	0.0013101	0.981
chr3	138273385	138797736	524353	Gain	0.0038677	0.981
chr17	34394292	34923041	528751	Gain	0.0298204	0.981
chr20	43543245	44052992	509749	Gain	0.000145464	0.981
chr7	731661	1243748	512089	Gain	0.0323309	0.981
chr7	9529320	10049901	520583	Gain	0.0218635	0.981
chr2	86212000	86725066	513068	Gain	0.049089	0.981
chr19	30128721	30635472	506753	Gain	0.00653884	0.9815
chr11	117961909	118570410	608503	Loss	0.00127277	0.9815
chr9	72020697	72527024	506329	Gain	0.0295474	0.9815
chr18	329586	948290	618706	Loss	0.00883085	0.9815
chr20	38871720	39378153	506435	Gain	0.000586425	0.9815
chr11	120878917	121486632	607717	Loss	0.00127277	0.982
chr11	45523541	46122755	599216	Loss	0.0208064	0.982
chr1	234456245	234962528	506285	Gain	0.00308367	0.982
chr11	95856250	96462509	606261	Loss	0.00127277	0.982
chr11	49224216	49831630	607416	Loss	0.0074303	0.982
chr11	132701350	133306064	604716	Loss	0.00022433	0.982
chr3	192571029	193076940	505913	Gain	0.000732976	0.982
chr3	191894727	192399804	505079	Gain	0.000732976	0.983
chr20	49206144	49709374	503232	Gain	0.000145464	0.983
chr1	222795770	223301166	505398	Gain	0.00744067	0.983
chr11	82233046	82824210	591166	Loss	0.000389739	0.9835
chr5	131580033	132081896	501865	Gain	0.0413305	0.984
chr13	103524146	104025538	501394	Gain	0.0309077	0.984
chr7	14223472	14724294	500824	Gain	0.0151315	0.984
chr13	96567400	97070044	502646	Gain	0.0307143	0.984
chr1	222295588	222795117	499531	Gain	0.00744067	0.984
chr9	125824128	126312733	488607	Gain	0.00710295	0.9845
chr7	28709464	29206775	497313	Gain	0.0218635	0.9845
chr2	185413366	185901953	488589	Gain	0.0123434	0.9845
chr9	111064187	111554987	490802	Gain	0.0040814	0.9845
chr20	52249775	52735467	485694	Gain	0.000977654	0.9845
chr11	97305328	97879408	574082	Loss	0.000708023	0.9845
chr1	206290890	206776967	486079	Gain	0.00744067	0.9845
chr2	119149435	119639039	489606	Gain	0.0496022	0.9845
chr17	42308564	42805874	497312	Gain	0.0451248	0.9845
chr2	158321735	158820859	499126	Gain	0.0155531	0.9845
chr18	63956802	64534417	577617	Loss	0.00109434	0.9845
chr1	205109404	205607837	498435	Gain	0.00744067	0.9845
chr9	133765657	134246224	480569	Gain	0.018092	0.985
chr1	231816171	232300841	484672	Gain	0.00308367	0.985
chr1	191660835	192141836	481003	Gain	0.011649	0.985
chr7	31332089	31814451	482364	Gain	0.0227997	0.985
chr13	97538820	98023111	484293	Gain	0.0428835	0.985
chr2	199699941	200176638	476699	Gain	0.015695	0.985
chr13	63769605	64246745	477142	Gain	0.00684491	0.985
chr5	168958483	169436127	477646	Gain	0.0230953	0.985
chr7	27696653	28174491	477840	Gain	0.0218635	0.985
chr13	59140024	59622192	482170	Gain	0.00291634	0.985
chr7	3631115	4116507	485394	Gain	0.0218635	0.985
chr1	236900538	237380455	479919	Gain	0.00189251	0.985
chr1	171980635	172464898	484265	Gain	0.0207575	0.985
chr3	167135363	167620525	485164	Gain	0.0023226	0.985
chr18	4483453	5052333	568882	Loss	0.00233746	0.9855
chr11	72640600	73210072	569474	Loss	0.000212464	0.9855
chr13	61592946	62068438	475494	Gain	0.00450528	0.9865
chr11	111182531	111731487	548958	Loss	0.000708023	0.987
chr11	98878019	99423545	545528	Loss	0.000708023	0.9875
chr18	63199566	63732881	533317	Loss	0.00109434	0.988
chr11	71291471	71834288	542819	Loss	0.00011479	0.988
chr16	14216086	14747102	531018	Loss	0.0230953	0.988
chr5	146783657	147310363	526708	Loss	0.0238422	0.988
chr16	11149750	11679822	530074	Loss	0.0230953	0.988
chr11	59348380	59868648	520270	Loss	3.81e-06	0.9885
chr5	143013271	143486209	472940	Gain	0.0413305	0.9885
chr17	56508057	56982451	474396	Gain	0.0451248	0.9885
chr20	56148172	56622038	473868	Gain	0.000346926	0.9885
chr3	64654305	65128086	473783	Gain	0.0415716	0.9885
chr11	31173243	31684442	511201	Loss	0.047587	0.9885
chr3	126273470	126745295	471827	Gain	0.0122297	0.9885
chr2	160062609	160535473	472866	Gain	0.00961489	0.9885
chr11	83267986	83774103	506119	Loss	0.000708023	0.9885
chr18	39062967	39576234	513269	Loss	0.00119061	0.9885
chr20	14691123	15165523	474402	Gain	0.00950974	0.9885
chr11	709861	1230810	520951	Loss	0.0295474	0.9885
chr13	53500579	53968567	467990	Gain	0.00291634	0.9885
chr2	168669343	169137498	468157	Gain	0.0314804	0.9885
chr9	127751074	128219867	468795	Gain	0.018092	0.9885
chr20	61669036	62137355	468321	Gain	9.78e-05	0.9885
chr8	21172943	21694746	521805	Loss	0.0310569	0.9885
chr9	73641640	74104808	463170	Gain	0.0295474	0.989
chr13	49671235	50135336	464103	Gain	0.00685872	0.989
chr13	91667999	92133941	465944	Gain	0.0102944	0.989
chr3	153072561	153536236	463677	Gain	0.0013101	0.989
chr20	42790018	43253131	463115	Gain	0.000145464	0.989
chr9	130102154	130561066	458914	Gain	0.018092	0.9895
chr1	178534221	178992447	458228	Gain	0.0207575	0.9895
chr17	28353878	28811299	457423	Gain	0.0235086	0.9895
chr11	91429589	91922990	493403	Loss	0.00127277	0.9895
chr2	101343679	101802078	458401	Gain	0.049089	0.9895
chr2	189583717	190045627	461912	Gain	0.0123434	0.9895
chr21	33567578	34025924	458348	Gain	0.0413305	0.9895
chr1	201455884	201914263	458381	Gain	0.00381537	0.9895
chr1	156397982	156855617	457637	Gain	0.0458959	0.9895
chr7	4126141	4583267	457128	Gain	0.0218635	0.9895
chr3	165509351	165957104	447755	Gain	0.0013101	0.99
chr1	210780548	211225288	444742	Gain	0.011649	0.99
chr5	914233	1359937	445706	Gain	0.0451248	0.99
chr2	224397462	224847340	449880	Gain	0.0314804	0.99
chr5	149020167	149472485	452320	Gain	0.0413305	0.99
chr3	57423247	57876415	453170	Gain	0.0325174	0.99
chr9	90280801	90731440	450641	Gain	0.018092	0.99
chr9	88829688	89277484	447798	Gain	0.018092	0.99
chr5	150473675	150963802	490129	Loss	0.0362889	0.99
chr1	174984886	175429373	444489	Gain	0.0207575	0.99
chr9	119572335	120027912	455579	Gain	0.0109391	0.99
chr5	136351988	136798441	446455	Gain	0.0413305	0.99
chr2	168103701	168558672	454973	Gain	0.0314804	0.99
chr7	26871965	27328346	456383	Gain	0.0151315	0.99
chr2	140695102	141140628	445528	Gain	0.049089	0.99
chr20	9675811	10122211	446402	Gain	0.0270241	0.99
chr2	179502827	179953037	450212	Gain	0.0123434	0.99
chr13	76615911	77071122	455213	Gain	0.00291528	0.99
chr3	117156738	117603204	446468	Gain	0.0349244	0.99
chr3	66298962	66744271	445311	Gain	0.0415716	0.99
chr2	88699368	89130753	431387	Gain	0.0496022	0.9905
chr3	172464001	172898727	434728	Gain	0.0013101	0.9905
chr13	98755189	99196939	441752	Gain	0.0428835	0.9905
chr13	38225210	38666373	441165	Gain	0.0216367	0.9905
chr13	98315395	98754526	439133	Gain	0.0428835	0.9905
chr7	36042222	36475772	433552	Gain	0.032006	0.9905
chr9	130562788	131000873	438087	Gain	0.018092	0.9905
chr13	38667778	39098913	431137	Gain	0.0216367	0.9905
chr17	29280316	29710351	430037	Gain	0.0412326	0.9905
chr13	78011919	78455941	444024	Gain	0.00450528	0.9905
chr7	29206776	29648107	441333	Gain	0.0230702	0.9905
chr7	32280067	32717473	437408	Gain	0.0227997	0.9905
chr3	127494236	127929153	434919	Gain	0.0040814	0.9905
chr1	221118814	221563143	444331	Gain	0.00744067	0.9905
chr3	168314501	168753729	439230	Gain	0.0023226	0.9905
chr1	223510435	223953298	442865	Gain	0.00744067	0.9905
chr3	190022324	190461988	439666	Gain	0.000732976	0.9905
chr1	164184998	164620089	435093	Gain	0.0207575	0.9905
chr11	120405521	120878916	473397	Loss	0.000708023	0.991
chr3	87809086	88214145	405061	Gain	0.0234456	0.991
chr9	137597999	138008243	410246	Gain	0.0392257	0.991
chr8	19667560	20143688	476130	Loss	0.0310569	0.991
chr5	138072083	138495158	423077	Gain	0.0413305	0.991
chr13	104292537	104719121	426586	Gain	0.0309077	0.991
chr20	40679107	41108120	429015	Gain	0.000586425	0.991
chr2	208504593	208909575	404984	Gain	0.038105	0.991
chr11	41957139	42438014	480877	Loss	0.0349244	0.991
chr11	57889549	58372119	482572	Loss	0.000708023	0.991
chr11	67294309	67770618	476311	Loss	6.68e-05	0.991
chr11	99423546	99905301	481757	Loss	0.00127277	0.991
chr9	80277516	80679305	401791	Gain	0.0295474	0.991
chr13	42247986	42651002	403018	Gain	0.0306693	0.991
chr1	232300842	232708195	407355	Gain	0.00308367	0.991
chr2	223443761	223852352	408593	Gain	0.0198618	0.991
chr2	155952930	156360558	407630	Gain	0.0155531	0.991
chr7	11124529	11553162	428635	Gain	0.0218635	0.991
chr7	29648354	30071211	422859	Gain	0.0230702	0.991
chr13	91195865	91604882	409019	Gain	0.0102944	0.991
chr17	59446196	59872404	426210	Gain	0.0451248	0.991
chr3	125311308	125734271	422965	Gain	0.0122297	0.991
chr2	171977767	172402536	424771	Gain	0.0246357	0.991
chr1	189256792	189679456	422666	Gain	0.0207575	0.991
chr13	20115374	20527410	412038	Gain	0.0307936	0.991
chr2	167675557	168095806	420251	Gain	0.0314804	0.991
chr17	55562229	55964834	402607	Gain	0.0451248	0.991
chr18	36041125	36515969	474846	Loss	0.00080158	0.991
chr3	147897083	148310500	413419	Gain	0.0013101	0.991
chr5	74540735	75016846	476113	Loss	0.0466735	0.991
chr11	114658637	115136713	478078	Loss	0.000708023	0.991
chr1	163090553	163510211	419660	Gain	0.0207575	0.991
chr13	44462985	44882626	419643	Gain	0.0216367	0.991
chr2	137464289	137866131	401844	Gain	0.049089	0.991
chr3	176900851	177314358	413509	Gain	0.00226554	0.991
chr2	137037120	137464271	427153	Gain	0.049089	0.991
chr1	180258759	180682846	424089	Gain	0.0310969	0.991
chr1	162417689	162836849	419162	Gain	0.0207575	0.991
chr13	65395607	65811710	416105	Gain	0.00684491	0.991
chr13	34125183	34537814	412633	Gain	0.0149842	0.991
chr1	234034233	234456244	422013	Gain	0.00308367	0.991
chr1	239258400	239679543	421145	Gain	0.00114975	0.991
chr20	1193685	1619164	425481	Gain	0.0377153	0.991
chr13	30884562	31310579	426019	Gain	0.0149842	0.991
chr3	191487404	191894726	407324	Gain	0.000732976	0.991
chr13	48997928	49409343	411417	Gain	0.00685872	0.991
chr13	30379613	30803252	423641	Gain	0.0149842	0.991
chr11	74895254	75363330	468078	Loss	6.68e-05	0.9915
chr13	96154596	96546377	391783	Gain	0.0307143	0.9915
chr1	206962380	207360997	398619	Gain	0.00744067	0.9915
chr20	49843436	50223975	380541	Gain	0.000145464	0.9915
chr9	107125806	107503333	377529	Gain	0.00122455	0.9915
chr17	57171147	57567551	396406	Gain	0.0451248	0.9915
chr13	57660394	58051240	390848	Gain	0.00685872	0.9915
chr9	115702066	116085422	383358	Gain	0.0023226	0.9915
chr13	72917832	73294682	376852	Gain	0.00262229	0.9915
chr13	27965545	28360486	394943	Gain	0.00953436	0.9915
chr20	47744947	48145528	400583	Gain	0.000145464	0.9915
chr18	10038833	10503662	464831	Loss	0.00371171	0.9915
chr9	17441744	17832232	390490	Gain	0.038105	0.9915
chr13	43391673	43790912	399241	Gain	0.0216367	0.9915
chr2	141237995	141627088	389095	Gain	0.049089	0.9915
chr9	118251349	118642034	390687	Gain	0.0109391	0.9915
chr1	230183334	230583322	399990	Gain	0.0179843	0.9915
chr2	206386331	206785190	398861	Gain	0.038105	0.9915
chr20	2886851	3277851	391002	Gain	0.0270241	0.9915
chr13	41648573	42036066	387495	Gain	0.0216153	0.9915
chr9	131009113	131397478	388367	Gain	0.018092	0.9915
chr9	120261121	120651206	390087	Gain	0.0109391	0.9915
chr2	142480805	142863159	382356	Gain	0.049089	0.9915
chr9	121037998	121421859	383863	Gain	0.0109391	0.9915
chr18	44338245	44802609	464366	Loss	0.00223457	0.9915
chr2	107000207	107389110	388905	Gain	0.0496022	0.9915
chr1	192449934	192840948	391016	Gain	0.011649	0.9915
chr20	38481575	38868605	387032	Gain	0.000586425	0.9915
chr9	26521954	26914917	392965	Gain	0.038105	0.9915
chr3	145066107	145449825	383720	Gain	0.0013101	0.9915
chr2	198898140	199293825	395687	Gain	0.015695	0.9915
chr11	98132694	98598541	465849	Loss	0.000708023	0.9915
chr2	172840386	173239057	398673	Gain	0.0246357	0.9915
chr1	202298109	202677178	379071	Gain	0.00381537	0.9915
chr13	114188367	114584049	395684	Gain	0.0428052	0.9915
chr11	2308305	2771682	463379	Loss	0.0295474	0.9915
chr9	125154536	125548583	394049	Gain	0.0040814	0.9915
chr9	83474520	83852473	377955	Gain	0.0295474	0.9915
chr2	149934245	150330247	396004	Gain	0.0155531	0.9915
chr2	201681615	202078494	396881	Gain	0.0246357	0.9915
chr2	190643257	191023798	380543	Gain	0.0246357	0.9915
chr1	210291476	210670351	378877	Gain	0.011649	0.9915
chr13	70236135	70636306	400173	Gain	0.00684222	0.9915
chr9	92052266	92449453	397189	Gain	0.018092	0.9915
chr5	179343730	179743193	399465	Gain	0.0415716	0.9915
chr2	171410786	171805869	395085	Gain	0.0123434	0.9915
chr13	95205884	95595375	389493	Gain	0.0307143	0.9915
chr9	107604508	107993182	388676	Gain	0.0040814	0.9915
chr11	133306065	133768885	462822	Loss	0.0001228	0.992
chr1	232708401	233082059	373660	Gain	0.00308367	0.992
chr20	7155865	7532313	376450	Gain	0.0367153	0.992
chr2	148106473	148479918	373447	Gain	0.0155531	0.992
chr1	240135772	240511474	375704	Gain	0.00744067	0.992
chr19	29489042	29864580	375540	Gain	0.0109391	0.992
chr2	172402561	172777812	375253	Gain	0.0246357	0.992
chr9	128220308	128589889	369583	Gain	0.018092	0.9925
chr17	30266929	30634362	367435	Gain	0.0279113	0.9925
chr1	171610741	171980634	369895	Gain	0.0207575	0.9925
chr20	37379049	37747737	368690	Gain	0.000586425	0.9925
chr13	94232276	94601834	369560	Gain	0.0216849	0.9925
chr7	11553484	11926347	372865	Gain	0.0218635	0.9925
chr1	158681180	159050158	368980	Gain	0.0310969	0.9925
chr20	36328382	36700221	371841	Gain	0.0011115	0.9925
chr1	167156817	167526674	369859	Gain	0.0207575	0.9925
chr9	92449524	92821014	371492	Gain	0.018092	0.9925
chr7	34362918	34730254	367338	Gain	0.032006	0.9925
chr2	214355691	214725733	370044	Gain	0.0198618	0.9925
chr1	239686177	240055114	368939	Gain	0.00381537	0.9925
chr2	159519369	159888917	369550	Gain	0.0155531	0.9925
chr11	111731488	112192522	461036	Loss	0.00191285	0.9925
chr19	30768759	31135676	366919	Gain	0.00653884	0.9925
chr19	31560164	31933544	373382	Gain	0.0155531	0.9925
chr18	14026536	14482920	456386	Loss	0.00378103	0.993
chr3	149630965	149988283	357320	Gain	0.000732976	0.993
chr10	104036449	104462361	425914	Loss	0.0279113	0.993
chr9	91681960	92040063	358105	Gain	0.018092	0.993
chr13	68035371	68388376	353007	Gain	0.00450528	0.993
chr11	86797999	87240021	442024	Loss	0.00127277	0.993
chr9	98550468	98895270	344804	Gain	0.0109391	0.993
chr11	113278765	113708376	429613	Loss	0.000708023	0.993
chr7	16176841	16523657	346818	Gain	0.0151315	0.993
chr7	3281341	3629596	348257	Gain	0.0218635	0.993
chr11	32131671	32559192	427523	Loss	0.0349244	0.993
chr2	137917867	138280457	362592	Gain	0.049089	0.993
chr5	179772641	180226570	453931	Loss	0.0484222	0.993
chr3	96688739	97034836	346099	Gain	0.0349244	0.993
chr7	27335562	27696652	361092	Gain	0.0151315	0.993
chr9	115343223	115694715	351494	Gain	0.0023226	0.993
chr2	164514239	164867726	353489	Gain	0.0314804	0.993
chr11	85599146	86039552	440408	Loss	0.00127277	0.993
chr1	168375974	168726369	350397	Gain	0.0207575	0.993
chr5	149020167	149472485	452320	Loss	0.0362889	0.993
chr11	79723318	80173898	450582	Loss	0.000708023	0.993
chr17	30918210	31275427	357219	Gain	0.0279113	0.993
chr13	67140467	67500412	359947	Gain	0.00684491	0.993
chr18	51862182	52309962	447782	Loss	0.000328366	0.993
chr13	37863209	38224149	360942	Gain	0.0216367	0.993
chr11	125561002	125979757	418757	Loss	0.00127277	0.993
chr11	91923771	92381775	458006	Loss	0.00127277	0.993
chr11	41293375	41743040	449667	Loss	0.0208064	0.993
chr11	122615922	123034814	418894	Loss	0.00127277	0.993
chr21	32823400	33176022	352624	Gain	0.0413305	0.993
chr3	132211994	132566246	354254	Gain	0.0023226	0.993
chr20	32143601	32506595	362996	Gain	0.00203077	0.993
chr1	220762911	221113051	350142	Gain	0.00744067	0.993
chr13	114584284	114946858	362576	Gain	0.0428052	0.993
chr19	28340295	28686261	345968	Gain	0.0392257	0.993
chr2	193569241	193928986	359747	Gain	0.0246357	0.993
chr5	136351988	136798441	446455	Loss	0.0466735	0.993
chr13	46844654	47197754	353102	Gain	0.0307143	0.993
chr18	74282563	74708562	426001	Loss	0.000191149	0.993
chr1	200502570	200857773	355205	Gain	0.00744067	0.993
chr13	66072168	66421444	349278	Gain	0.0102245	0.993
chr20	31319841	31671888	352049	Gain	0.00203077	0.993
chr11	90973850	91423476	449628	Loss	0.000708023	0.993
chr11	1230811	1672833	442024	Loss	0.0295474	0.993
chr17	54412149	54776954	364807	Gain	0.0451248	0.993
chr13	87317979	87677612	359635	Gain	0.0150632	0.993
chr8	12917220	13356256	439038	Loss	0.0433759	0.993
chr18	68137622	68569577	431957	Loss	0.00109434	0.993
chr2	139395005	139759915	364912	Gain	0.049089	0.993
chr5	127905735	128250567	344834	Gain	0.0413305	0.993
chr20	11473890	11826658	352770	Gain	0.0184492	0.993
chr13	41043558	41394949	351393	Gain	0.0216153	0.993
chr11	77211137	77641465	430330	Loss	0.00127277	0.993
chr2	150331753	150696628	364877	Gain	0.0155531	0.993
chr13	43790913	44151571	360660	Gain	0.0306693	0.993
chr16	13525213	13956227	431016	Loss	0.0230953	0.993
chr18	67504885	67935194	430311	Loss	0.00109434	0.993
chr11	58920669	59348379	427712	Loss	7.4e-06	0.993
chr18	58242028	58674262	432236	Loss	0.000328366	0.993
chr1	209164486	209530176	365692	Gain	0.00616225	0.993
chr3	176537366	176900850	363486	Gain	0.000732976	0.993
chr11	40702356	41159118	456764	Loss	0.0208064	0.993
chr11	88957047	89407390	450345	Loss	0.000708023	0.993
chr11	90203935	90604350	400417	Loss	0.000708023	0.9935
chr13	54079365	54421114	341751	Gain	0.00291634	0.9935
chr2	106152105	106479805	327702	Gain	0.0496022	0.9935
chr13	59889360	60226201	336843	Gain	0.00450528	0.9935
chr9	2443767	2778747	334982	Gain	0.038105	0.9935
chr2	153553152	153889391	336241	Gain	0.0155531	0.9935
chr11	110660305	111056615	396312	Loss	0.000708023	0.9935
chr13	82326923	82668238	341317	Gain	0.0102245	0.9935
chr1	233086008	233425548	339542	Gain	0.00308367	0.9935
chr7	30071212	30412943	341733	Gain	0.0218635	0.9935
chr18	37524197	37919807	395612	Loss	0.000730685	0.9935
chr2	207696274	208039622	343350	Gain	0.038105	0.9935
chr9	136535484	136865089	329607	Gain	0.0392257	0.9935
chr20	3464864	3803446	338584	Gain	0.0377153	0.9935
chr1	231358368	231702096	343730	Gain	0.00308367	0.9935
chr2	208910019	209248246	338229	Gain	0.038105	0.9935
chr9	75494008	75824801	330795	Gain	0.0295474	0.9935
chr13	77071123	77408426	337305	Gain	0.00291528	0.9935
chr7	25271648	25612982	341336	Gain	0.0218635	0.9935
chr17	58260371	58604460	344091	Gain	0.0194264	0.9935
chr19	34069166	34404756	335592	Gain	0.047587	0.9935
chr13	83904767	84242942	338177	Gain	0.0150632	0.9935
chr18	21926801	22322902	396103	Loss	0.00207362	0.9935
chr1	214774523	215111693	337172	Gain	0.00744067	0.9935
chr17	54779265	55121067	341804	Gain	0.0451248	0.9935
chr13	86299866	86637199	337335	Gain	0.0150632	0.9935
chr1	207360998	207697830	336834	Gain	0.011649	0.9935
chr5	136824662	137167984	343324	Gain	0.0413305	0.9935
chr13	39529227	39867370	338145	Gain	0.0306693	0.9935
chr18	24576252	24975902	399652	Loss	0.00196906	0.9935
chr7	32854252	33190590	336340	Gain	0.0227997	0.9935
chr9	100161758	100497998	336242	Gain	0.0040814	0.9935
chr19	32028004	32364197	336195	Gain	0.0248604	0.9935
chr5	179343730	179743193	399465	Loss	0.0484222	0.9935
chr1	219748819	220088046	339229	Gain	0.00744067	0.9935
chr1	154818353	155157070	338719	Gain	0.0310969	0.9935
chr5	131251203	131580032	328831	Gain	0.0413305	0.9935
chr9	113802620	114137566	334948	Gain	0.0023226	0.9935
chr17	66901215	67241482	340269	Gain	0.0353679	0.9935
chr11	88367675	88768333	400660	Loss	0.00127277	0.9935
chr18	22971857	23382983	411128	Loss	0.00124226	0.9935
chr11	76420184	76805777	385595	Loss	0.000389739	0.994
chr18	7120241	7507983	387744	Loss	0.00233746	0.994
chr19	30768759	31135676	366919	Loss	0.0325174	0.994
chr18	72254868	72641611	386745	Loss	0.000555643	0.994
chr11	93309502	93682868	373368	Loss	0.00127277	0.994
chr18	54400037	54773343	373308	Loss	0.000328366	0.994
chr14	24881592	25248545	366955	Loss	0.0430087	0.994
chr11	43561142	43934717	373577	Loss	0.0208064	0.994
chr11	90604926	90973772	368848	Loss	0.000708023	0.994
chr18	76736062	77107934	371874	Loss	0.000109635	0.994
chr18	12812896	13182539	369645	Loss	0.00238285	0.994
chr19	29489042	29864580	375540	Loss	0.0325174	0.994
chr11	108462728	108843164	380438	Loss	0.000708023	0.994
chr18	5584968	5958901	373935	Loss	0.00515471	0.994
chr18	51083969	51477720	393753	Loss	9.78e-05	0.994
chr18	1713348	2079800	366454	Loss	0.00883085	0.994
chr8	13755908	14140053	384147	Loss	0.0433759	0.994
chr18	29841532	30225065	383535	Loss	0.00744782	0.994
chr10	59444867	59795023	350158	Loss	0.0496022	0.9945
chr20	50761816	51075767	313953	Gain	0.000297863	0.9945
chr18	11042752	11405067	362317	Loss	0.00371171	0.9945
chr9	126333104	126656011	322909	Gain	0.00710295	0.9945
chr3	59221064	59539910	318848	Gain	0.016494	0.9945
chr13	20795889	21112469	316582	Gain	0.0307936	0.9945
chr1	197072295	197388240	315947	Gain	0.011649	0.9945
chr19	46566856	46930024	363170	Loss	0.0413305	0.9945
chr10	106861852	107220809	358959	Loss	0.0458959	0.9945
chr20	47136001	47457014	321015	Gain	0.000145464	0.9945
chr20	6336002	6651608	315608	Gain	0.0178397	0.9945
chr2	221447590	221762041	314453	Gain	0.0198618	0.9945
chr9	136133699	136446878	313181	Gain	0.0392257	0.9945
chr18	26556174	26918539	362367	Loss	0.000390141	0.9945
chr17	64267345	64588660	321317	Gain	0.0353679	0.9945
chr13	78891552	79217160	325610	Gain	0.00684491	0.9945
chr9	25151155	25465748	314595	Gain	0.038105	0.9945
chr13	97192103	97508888	316787	Gain	0.0428835	0.9945
chr9	89851715	90171438	319725	Gain	0.018092	0.9945
chr11	33248297	33602981	354686	Loss	0.0349244	0.9945
chr7	23160134	23472618	312486	Gain	0.0151315	0.9945
chr18	32074927	32435138	360213	Loss	0.0107037	0.9945
chr11	9471707	9822595	350890	Loss	0.047587	0.9945
chr1	186247924	186573949	326027	Gain	0.0207575	0.9945
chr11	80928810	81292508	363700	Loss	0.000708023	0.9945
chr18	62556461	62910607	354148	Loss	0.000328366	0.9945
chr11	118575870	118931238	355370	Loss	0.00127277	0.9945
chr9	120707611	121031579	323970	Gain	0.0109391	0.9945
chr11	40337459	40702355	364898	Loss	0.047587	0.9945
chr17	36123527	36440483	316958	Gain	0.0353679	0.9945
chr11	57526628	57889548	362922	Loss	0.000389739	0.9945
chr18	27644624	27997172	352550	Loss	0.00111418	0.9945
chr13	33802117	34123834	321719	Gain	0.0149842	0.9945
chr3	65248880	65567501	318623	Gain	0.0415716	0.9945
chr3	130999714	131320974	321262	Gain	0.0023226	0.9945
chr13	74736393	75055943	319552	Gain	0.00414403	0.9945
chr20	5398142	5723376	325236	Gain	0.0123287	0.9945
chr11	133785127	134137132	352007	Loss	0.0001228	0.9945
chr13	54425033	54700854	275823	Gain	0.00291634	0.995
chr20	53020886	53305169	284285	Gain	0.000977654	0.995
chr1	182366278	182668438	302162	Gain	0.011649	0.995
chr1	241766551	242062844	296295	Gain	0.00381537	0.995
chr13	58694868	58974919	280053	Gain	0.00291634	0.995
chr20	6662678	6928532	265856	Gain	0.0178397	0.995
chr19	32375148	32672694	297548	Gain	0.0248604	0.995
chr1	213371128	213666950	295824	Gain	0.00381537	0.995
chr9	138460445	138707727	247284	Gain	0.0248604	0.995
chr13	68670304	68915692	245390	Gain	0.00450528	0.995
chr2	204228793	204494697	265906	Gain	0.0198618	0.995
chr1	162836982	163087387	250407	Gain	0.0207575	0.995
chr1	207854704	208130905	276203	Gain	0.011649	0.995
chr20	54523163	54781816	258655	Gain	0.000509244	0.995
chr2	192028543	192277370	248829	Gain	0.0246357	0.995
chr20	9059792	9334520	274730	Gain	0.0178397	0.995
chr2	222166281	222471012	304733	Gain	0.0198618	0.995
chr5	176493263	176776652	283391	Gain	0.0415716	0.995
chr13	100277144	100582833	305691	Gain	0.0430045	0.995
chr20	54875532	55162444	286914	Gain	0.000509244	0.995
chr2	190321429	190571312	249885	Gain	0.0246357	0.995
chr9	109078912	109352947	274037	Gain	0.0040814	0.995
chr7	136485096	136751061	265967	Gain	0.0499872	0.995
chr2	190045628	190321150	275524	Gain	0.0246357	0.995
chr2	123526711	123772129	245420	Gain	0.0496022	0.995
chr1	176840059	177145364	305307	Gain	0.0207575	0.995
chr2	188549041	188803621	254582	Gain	0.0123434	0.995
chr13	113011260	113262045	250787	Gain	0.0428052	0.995
chr9	117456140	117758148	302010	Gain	0.0040814	0.995
chr9	103144291	103452056	307767	Gain	0.0040814	0.995
chr5	133164056	133432861	268807	Gain	0.0413305	0.995
chr5	142561294	142872509	311217	Gain	0.0413305	0.995
chr1	235063871	235326579	262710	Gain	0.00308367	0.995
chr5	141212207	141475177	262972	Gain	0.0413305	0.995
chr20	2205941	2516388	310449	Gain	0.0270241	0.995
chr9	95647838	95935292	287456	Gain	0.0109391	0.995
chr2	179963276	180209322	246048	Gain	0.0123434	0.995
chr2	188241953	188548309	306358	Gain	0.0123434	0.995
chr2	106742178	106994240	252064	Gain	0.0496022	0.995
chr2	186039474	186297214	257742	Gain	0.0123434	0.995
chr21	18049541	18355562	306023	Gain	0.0413305	0.995
chr2	102735706	103039742	304038	Gain	0.0496022	0.995
chr9	123807538	124056427	248891	Gain	0.0109391	0.995
chr13	72386379	72656239	269862	Gain	0.00414403	0.995
chr9	128987481	129242671	255192	Gain	0.0109391	0.995
chr21	34028116	34290943	262829	Gain	0.0413305	0.995
chr13	71864811	72176752	311943	Gain	0.00414403	0.995
chr1	187341808	187606050	264244	Gain	0.0207575	0.995
chr17	66058921	66352355	293436	Gain	0.0235086	0.995
chr20	39627038	39876604	249568	Gain	0.000586425	0.995
chr2	152182095	152466324	284231	Gain	0.0155531	0.995
chr21	36375317	36661638	286323	Gain	0.0413305	0.995
chr20	12919861	13197802	277943	Gain	0.0262133	0.995
chr1	229922597	230183333	260738	Gain	0.0179843	0.995
chr5	132465201	132742126	276927	Gain	0.0413305	0.995
chr1	228956247	229254402	298157	Gain	0.0179843	0.995
chr3	124969593	125255477	285886	Gain	0.0122297	0.995
chr5	132743874	133009269	265397	Gain	0.0413305	0.995
chr2	103985378	104246132	260756	Gain	0.0496022	0.995
chr20	56771169	57046685	275518	Gain	0.000346926	0.995
chr1	185914774	186167932	253160	Gain	0.011649	0.995
chr5	127627830	127888093	260265	Gain	0.0413305	0.995
chr2	122599665	122873913	274250	Gain	0.0496022	0.995
chr17	28952029	29225285	273258	Gain	0.0412326	0.995
chr13	25711096	25972479	261385	Gain	0.0428052	0.995
chr5	128303407	128577385	273980	Gain	0.0413305	0.995
chr17	66352356	66642694	290340	Gain	0.0235086	0.995
chr5	128630593	128881009	250418	Gain	0.0413305	0.995
chr3	127149772	127420340	270570	Gain	0.0040814	0.995
chr2	119952446	120247852	295408	Gain	0.0496022	0.995
chr5	148569683	148819291	249610	Gain	0.0413305	0.995
chr2	197302393	197610702	308311	Gain	0.015695	0.995
chr1	178276885	178532010	255127	Gain	0.0207575	0.995
chr20	7805645	8085071	279428	Gain	0.0262133	0.995
chr13	93348178	93634590	286414	Gain	0.0216849	0.995
chr5	168704148	168958482	254336	Gain	0.0230953	0.995
chr13	94607113	94906616	299505	Gain	0.0216849	0.995
chr13	84779875	85070001	290128	Gain	0.0216849	0.995
chr9	93951548	94210211	258665	Gain	0.018092	0.995
chr5	168406697	168700920	294225	Gain	0.0230953	0.995
chr13	81815865	82063792	247929	Gain	0.0149901	0.995
chr13	81327737	81597179	269444	Gain	0.0149901	0.995
chr17	61280415	61526078	245665	Gain	0.0298204	0.995
chr13	93813754	94075103	261351	Gain	0.0216849	0.995
chr17	60317580	60580394	262816	Gain	0.0298204	0.995
chr17	59872405	60122323	249920	Gain	0.0298204	0.995
chr17	62407140	62688429	281291	Gain	0.0298204	0.995
chr7	2649264	2929426	280164	Gain	0.0230702	0.995
chr1	215135753	215415364	279613	Gain	0.00744067	0.995
chr3	172177697	172461347	283652	Gain	0.0013101	0.995
chr7	36502795	36751853	249060	Gain	0.032006	0.995
chr13	35634598	35911777	277181	Gain	0.0149842	0.995
chr13	32044914	32343892	298980	Gain	0.0216153	0.995
chr3	165257641	165509350	251711	Gain	0.0013101	0.995
chr13	46119800	46407442	287644	Gain	0.0216367	0.995
chr2	165598514	165853973	255461	Gain	0.00961489	0.995
chr5	135244496	135496799	252305	Gain	0.0230953	0.995
chr2	163760674	164061075	300403	Gain	0.00961489	0.995
chr2	164061076	164366757	305683	Gain	0.00961489	0.995
chr9	71127724	71425043	297321	Gain	0.0295474	0.995
chr1	211228022	211474960	246940	Gain	0.00616225	0.995
chr20	50411543	50682211	270670	Gain	0.000297863	0.995
chr13	28392773	28650810	258039	Gain	0.00953436	0.995
chr13	34904832	35195625	290795	Gain	0.0149842	0.995
chr5	170175066	170483192	308128	Gain	0.0230953	0.995
chr17	65328999	65576147	247150	Gain	0.0353679	0.995
chr7	35213416	35522862	309448	Gain	0.0442581	0.995
chr7	33423961	33694980	271021	Gain	0.032006	0.995
chr9	88445707	88752740	307035	Gain	0.018092	0.995
chr7	1246906	1540543	293639	Gain	0.0323309	0.995
chr1	150782797	151062311	279516	Gain	0.0458959	0.995
chr1	216700789	216965807	265020	Gain	0.00744067	0.995
chr13	95617411	95920458	303049	Gain	0.0307143	0.995
chr9	127245412	127529251	283841	Gain	0.018092	0.995
chr1	247177957	247485887	307932	Gain	0.00744067	0.995
chr1	203928376	204216410	288036	Gain	0.00744067	0.995
chr1	247499491	247807326	307837	Gain	0.00744067	0.995
chr19	28340295	28686261	345968	Loss	0.0325174	0.995
chr7	25017962	25271647	253687	Gain	0.0309077	0.995
chr3	166073921	166378015	304096	Gain	0.00653884	0.995
chr20	48739167	49021519	282354	Gain	0.000145464	0.995
chr1	244098260	244356268	258010	Gain	0.00744067	0.995
chr17	25757875	26017404	259531	Gain	0.0458959	0.995
chr19	29875849	30126535	250688	Gain	0.00653884	0.995
chr20	44178179	44475919	297742	Gain	0.000145464	0.995
chr9	114137567	114434069	296504	Gain	0.0023226	0.995
chr1	223953471	224204935	251466	Gain	0.00744067	0.995
chr17	57567552	57859130	291580	Gain	0.0451248	0.995
chr17	59169175	59444365	275192	Gain	0.0451248	0.995
chr13	46577960	46844283	266325	Gain	0.0307143	0.995
chr1	243765862	244057199	291339	Gain	0.00744067	0.995
chr7	25612983	25905241	292260	Gain	0.0151315	0.995
chr1	153219410	153493614	274206	Gain	0.0458959	0.995
chr9	72536236	72828580	292346	Gain	0.047587	0.995
chr7	7595285	7886450	291167	Gain	0.0230702	0.995
chr17	43199764	43485791	286029	Gain	0.0451248	0.995
chr7	22097476	22385660	288186	Gain	0.0151315	0.995
chr7	15743772	16020299	276529	Gain	0.0151315	0.995
chr1	174498995	174762322	263329	Gain	0.0310969	0.995
chr2	141848911	142126388	277479	Gain	0.049089	0.995
chr1	228497183	228802765	305584	Gain	0.0310969	0.995
chr1	224790611	225070052	279443	Gain	0.0136602	0.995
chr3	177508622	177767569	258949	Gain	0.000732976	0.995
chr3	188683033	188937250	254219	Gain	0.000732976	0.995
chr2	99928335	100214410	286077	Gain	0.0314804	0.995
chr9	4100237	4349212	248977	Gain	0.038105	0.995
chr19	34406926	34692586	285662	Gain	0.047587	0.995
chr13	49409344	49671214	261872	Gain	0.00685872	0.995
chr20	61065195	61322018	256825	Gain	9.78e-05	0.995
chr7	12186212	12437545	251335	Gain	0.0218635	0.995
chr2	146683518	146982802	299286	Gain	0.049089	0.995
chr3	141387115	141648607	261494	Gain	0.0013101	0.995
chr18	4081441	4426423	344984	Loss	0.00233746	0.995
chr3	186056555	186318613	262060	Gain	0.000732976	0.995
chr9	3785160	4058429	273271	Gain	0.038105	0.995
chr9	26256239	26521953	265716	Gain	0.038105	0.995
chr7	26227777	26488740	260965	Gain	0.0151315	0.995
chr13	63295314	63553646	258334	Gain	0.0102245	0.995
chr2	86784929	87055175	270248	Gain	0.049089	0.995
chr9	74104809	74354889	250082	Gain	0.0295474	0.995
chr9	71425224	71733668	308446	Gain	0.0295474	0.995
chr2	123892700	124187738	295040	Gain	0.0496022	0.995
chr13	52409237	52693316	284081	Gain	0.00450528	0.995
chr2	120891970	121161401	269433	Gain	0.0496022	0.995
chr20	4463845	4742776	278933	Gain	0.012802	0.995
chr5	127905735	128250567	344834	Loss	0.0404556	0.995
chr19	28686262	28941373	255113	Gain	0.0392257	0.995
chr13	92134219	92392695	258478	Gain	0.0102944	0.995
chr9	16914152	17165698	251548	Gain	0.0314804	0.995
chr2	169497129	169753638	256511	Gain	0.0314804	0.995
chr9	138116717	138395543	278828	Gain	0.0392257	0.995
chr2	167377996	167646644	268650	Gain	0.0314804	0.995
chr7	22842319	23149937	307620	Gain	0.0151315	0.995
chr13	54785149	55056430	271283	Gain	0.00451093	0.995
chr3	197281339	197538677	257340	Gain	0.000188269	0.995
chr9	140023307	140319648	296343	Gain	0.0392257	0.995
chr9	17834342	18085182	250842	Gain	0.038105	0.995
chr13	31725374	32011166	285794	Gain	0.0216153	0.995
chr9	116089588	116389289	299703	Gain	0.0023226	0.995
chr2	208040505	208334095	293592	Gain	0.038105	0.995
chr3	120520130	120817039	296911	Gain	0.0208064	0.995
chr7	22385887	22676860	290975	Gain	0.0151315	0.995
chr3	147576140	147882566	306428	Gain	0.0013101	0.995
chr13	51857726	52125528	267804	Gain	0.00684491	0.995
chr3	148313132	148591408	278278	Gain	0.0013101	0.995
chr20	36068389	36324206	255819	Gain	0.0011115	0.995
chr9	18102689	18405141	302454	Gain	0.038105	0.995
chr13	35301110	35561296	260188	Gain	0.0102129	0.995
chr1	242331083	242628099	297018	Gain	0.00468996	0.995
chr3	143482066	143746350	264286	Gain	0.0013101	0.995
chr13	102824662	103080052	255392	Gain	0.0218635	0.995
chr19	33022456	33283777	261323	Gain	0.0295474	0.995
chr9	23625467	23881167	255702	Gain	0.038105	0.995
chr13	40610749	40869227	258480	Gain	0.0216153	0.995
chr3	170750058	171015827	265771	Gain	0.0023226	0.995
chr20	3803447	4104509	301064	Gain	0.0377153	0.995
chr3	126745296	127026059	280765	Gain	0.00710295	0.995
chr7	31822881	32059324	236445	Gain	0.0227997	0.9955
chr20	37003300	37225397	222099	Gain	0.000586425	0.9955
chr2	224169312	224392194	222884	Gain	0.0314804	0.9955
chr20	34828609	35073343	244736	Gain	0.000586425	0.9955
chr7	6201259	6427897	226640	Gain	0.0218635	0.9955
chr2	200293238	200500530	207294	Gain	0.0246357	0.9955
chr13	52195002	52409236	214236	Gain	0.00684491	0.9955
chr13	51624282	51851121	226841	Gain	0.00684491	0.9955
chr1	195801362	196014664	213304	Gain	0.011649	0.9955
chr1	161963376	162195738	232364	Gain	0.0207575	0.9955
chr1	162196499	162417107	220610	Gain	0.0310969	0.9955
chr13	67730037	67954880	224845	Gain	0.00684491	0.9955
chr13	62068439	62277075	208638	Gain	0.00684491	0.9955
chr2	170548743	170757172	208431	Gain	0.0198618	0.9955
chr13	69994029	70234387	240360	Gain	0.00684222	0.9955
chr13	56746836	56957652	210818	Gain	0.00684491	0.9955
chr2	225675148	225899031	223885	Gain	0.0314804	0.9955
chr1	213037244	213253700	216458	Gain	0.00381537	0.9955
chr3	77812727	78019747	207022	Gain	0.0415716	0.9955
chr3	173632871	173872233	239364	Gain	0.0013101	0.9955
chr5	179110851	179342959	232110	Gain	0.0415716	0.9955
chr3	173878101	174116775	238676	Gain	0.0013101	0.9955
chr3	156465429	156705859	240432	Gain	0.0013101	0.9955
chr2	167153789	167377766	223979	Gain	0.0314804	0.9955
chr3	149988284	150218614	230332	Gain	0.0013101	0.9955
chr9	114637494	114844798	207306	Gain	0.0013101	0.9955
chr20	53414539	53644367	229830	Gain	0.000509244	0.9955
chr1	182813641	183023695	210056	Gain	0.011649	0.9955
chr13	104728250	104961559	233311	Gain	0.0309077	0.9955
chr1	209532042	209750058	218018	Gain	0.00189251	0.9955
chr3	76646013	76886070	240059	Gain	0.0415716	0.9955
chr1	235976652	236203280	226630	Gain	0.00189251	0.9955
chr17	36849977	37055077	205102	Gain	0.0235086	0.9955
chr9	123574947	123795508	220563	Gain	0.0109391	0.9955
chr20	9403480	9612418	208940	Gain	0.0377153	0.9955
chr20	34224037	34455657	231622	Gain	0.0011115	0.9955
chr17	36599406	36821044	221640	Gain	0.0235086	0.9955
chr9	121422262	121653076	230816	Gain	0.0109391	0.9955
chr13	32490931	32725611	234682	Gain	0.0216153	0.9955
chr9	79427051	79666914	239865	Gain	0.0295474	0.9955
chr13	41424805	41648572	223769	Gain	0.0216153	0.9955
chr9	96126104	96362047	235945	Gain	0.0109391	0.9955
chr9	18465178	18671466	206290	Gain	0.038105	0.9955
chr17	80024535	80264593	240060	Gain	0.0279113	0.9955
chr3	136392225	136617553	225330	Gain	0.0023226	0.9955
chr9	37442516	37659365	216851	Gain	0.038105	0.9955
chr1	201914264	202127826	213564	Gain	0.00233178	0.9955
chr13	63556791	63769604	212815	Gain	0.0102245	0.9955
chr20	976104	1193684	217582	Gain	0.0377153	0.9955
chr9	26027347	26256238	228893	Gain	0.038105	0.9955
chr9	83229420	83462838	233420	Gain	0.0295474	0.9955
chr9	127529252	127751073	221823	Gain	0.0109391	0.9955
chr1	180034341	180258758	224419	Gain	0.0207575	0.9955
chr11	38398957	38741646	342691	Loss	0.0208064	0.9955
chr17	80654232	80874102	219872	Gain	0.0412326	0.9955
chr13	58051241	58272123	220884	Gain	0.00451093	0.9955
chr9	75286179	75493101	206924	Gain	0.0295474	0.9955
chr13	56356311	56579413	223104	Gain	0.00451093	0.9955
chr13	86758588	86983992	225406	Gain	0.0102944	0.9955
chr17	76794050	77033648	239600	Gain	0.0412326	0.9955
chr17	76558774	76794049	235277	Gain	0.0412326	0.9955
chr3	181232278	181453988	221712	Gain	0.000732976	0.9955
chr13	90884272	91099464	215194	Gain	0.0102944	0.9955
chr13	76071027	76281652	210627	Gain	0.00291528	0.9955
chr20	33199768	33422832	223066	Gain	0.00203077	0.9955
chr1	204452699	204693035	240338	Gain	0.00744067	0.9955
chr2	221927866	222166280	238416	Gain	0.0198618	0.9955
chr1	245940821	246158490	217671	Gain	0.00744067	0.9955
chr1	245329981	245545008	215029	Gain	0.00744067	0.9955
chr1	245112521	245329980	217461	Gain	0.00744067	0.9955
chr1	230951859	231174431	222574	Gain	0.00639857	0.9955
chr20	24260602	24476103	215503	Gain	0.0307143	0.9955
chr3	57877881	58120652	242773	Gain	0.0325174	0.9955
chr1	223301167	223510376	209211	Gain	0.00744067	0.9955
chr1	188584274	188793472	209200	Gain	0.0207575	0.9955
chr1	243559324	243765861	206539	Gain	0.00744067	0.9955
chr20	35761494	35982888	221396	Gain	0.00203077	0.9955
chr13	25049278	25269193	219917	Gain	0.0307143	0.9955
chr13	40242371	40451631	209262	Gain	0.0306693	0.9955
chr13	39875792	40116928	241138	Gain	0.0306693	0.9955
chr1	193233677	193475878	242203	Gain	0.011649	0.9955
chr13	37465550	37704054	238506	Gain	0.0306693	0.9955
chr3	129091024	129312988	221966	Gain	0.0040814	0.9955
chr5	134235318	134474556	239240	Gain	0.0413305	0.9955
chr13	44158054	44399501	241449	Gain	0.0306693	0.9955
chr1	214305864	214514360	208498	Gain	0.00744067	0.9955
chr1	174076677	174292271	215596	Gain	0.0207575	0.9955
chr9	102853879	103076161	222284	Gain	0.0040814	0.9955
chr9	120028347	120260120	231775	Gain	0.0109391	0.9955
chr1	204741232	204956325	215095	Gain	0.00744067	0.9955
chr13	71136182	71366106	229926	Gain	0.00414403	0.9955
chr13	71375102	71580557	205457	Gain	0.00414403	0.9955
chr1	233425549	233631560	206013	Gain	0.00497144	0.9955
chr17	64631557	64866456	234901	Gain	0.0353679	0.9955
chr1	188241207	188448222	207017	Gain	0.0207575	0.9955
chr20	58607007	58824988	217983	Gain	0.000673974	0.9955
chr11	10976163	11318441	342280	Loss	0.047587	0.9955
chr2	147900547	148105515	204970	Gain	0.049089	0.9955
chr20	43256330	43497185	240857	Gain	0.000145464	0.9955
chr20	51242286	51459376	217092	Gain	0.000297863	0.9955
chr2	103539432	103762221	222791	Gain	0.0496022	0.9955
chr2	196939555	197175981	236428	Gain	0.015695	0.9955
chr2	155015748	155222870	207124	Gain	0.0155531	0.9955
chr20	5723377	5939726	216351	Gain	0.0184492	0.9955
chr20	46418021	46633143	215124	Gain	0.000145464	0.9955
chr2	223854255	224069499	215246	Gain	0.0198618	0.9955
chr19	33563127	33788842	225717	Gain	0.047587	0.9955
chr7	5402606	5631264	228660	Gain	0.0151315	0.9955
chr7	4821746	5031771	210027	Gain	0.0151315	0.9955
chr2	151908949	152117779	208832	Gain	0.0155531	0.9955
chr1	228215378	228423936	208560	Gain	0.0179843	0.9955
chr13	33554955	33798641	243688	Gain	0.0149842	0.9955
chr2	177813868	178040694	226828	Gain	0.0123434	0.9955
chr7	35665348	35894737	229391	Gain	0.0442581	0.9955
chr17	56105033	56336675	231644	Gain	0.0451248	0.9955
chr20	61438601	61666805	228206	Gain	9.78e-05	0.9955
chr2	82509090	82726994	217906	Gain	0.049089	0.9955
chr20	41399414	41613071	213659	Gain	0.000297863	0.9955
chr9	128592201	128797550	205351	Gain	0.018092	0.9955
chr7	30884439	31112118	227681	Gain	0.0159988	0.9955
chr1	229591409	229808492	217085	Gain	0.0179843	0.9955
chr2	141627089	141832338	205251	Gain	0.049089	0.9955
chr13	90462471	90695736	233267	Gain	0.0150632	0.9955
chr19	42811716	43054813	243099	Gain	0.047587	0.9955
chr9	89643821	89851714	207895	Gain	0.018092	0.9955
chr20	46633144	46845066	211924	Gain	0.000297863	0.9955
chr20	60533715	60772864	239151	Gain	0.000202502	0.9955
chr7	5035085	5255411	220328	Gain	0.0151315	0.9955
chr19	33285657	33490685	205030	Gain	0.018092	0.9955
chr13	85273223	85491638	218417	Gain	0.0150632	0.9955
chr2	209791679	209999355	207678	Gain	0.0198618	0.9955
chr2	213978527	214183753	205228	Gain	0.0198618	0.9955
chr1	229356926	229591408	234484	Gain	0.0179843	0.9955
chr13	87686737	87918493	231758	Gain	0.0150632	0.9955
chr11	71981972	72294042	312072	Loss	0.00011479	0.996
chr11	46229266	46543524	314260	Loss	0.0208064	0.996
chr18	52934347	53272160	337815	Loss	0.000328366	0.996
chr11	129878232	130191145	312915	Loss	0.000406968	0.996
chr18	26092639	26404771	312134	Loss	0.000415237	0.996
chr11	117536136	117861571	325437	Loss	0.00127277	0.996
chr11	68028254	68367006	338754	Loss	0.00011479	0.996
chr18	49786526	50126636	340112	Loss	0.000171912	0.996
chr18	41325315	41639086	313773	Loss	0.00141182	0.996
chr8	19355818	19667559	311743	Loss	0.0433759	0.996
chr18	60614398	60931310	316914	Loss	0.000328366	0.996
chr11	86040664	86374123	333461	Loss	0.00127277	0.996
chr11	87875223	88194998	319777	Loss	0.00127277	0.996
chr11	62497962	62838068	340108	Loss	6.15e-05	0.996
chr14	23916306	24240684	324380	Loss	0.0430087	0.996
chr18	31762208	32074926	312720	Loss	0.0069134	0.996
chr11	127399031	127729267	330238	Loss	0.00127277	0.996
chr8	13356257	13673869	317614	Loss	0.0433759	0.996
chr18	73660954	73974941	313989	Loss	0.000328366	0.996
chr11	108944821	109279967	335148	Loss	0.000708023	0.996
chr19	32028004	32364197	336195	Loss	0.0325174	0.996
chr11	84574040	84904157	330119	Loss	0.000389739	0.996
chr18	7508561	7831265	322706	Loss	0.00207362	0.996
chr18	47486896	47827388	340494	Loss	0.000362336	0.996
chr18	49358194	49671741	313549	Loss	0.000328366	0.996
chr18	64608877	64941776	332901	Loss	0.00109434	0.996
chr11	30833718	31167539	333823	Loss	0.047587	0.996
chr11	56627905	56940534	312631	Loss	0.000708023	0.996
chr18	61784954	62110066	325114	Loss	0.000555643	0.996
chr18	33081161	33416936	335777	Loss	0.00281285	0.996
chr18	12300136	12613124	312990	Loss	0.00378103	0.996
chr11	57013248	57352561	339315	Loss	0.0001228	0.996
chr18	60933626	61252474	318850	Loss	0.000328366	0.996
chr11	84904158	85233250	329094	Loss	0.000708023	0.996
chr18	71918843	72238730	319889	Loss	0.000555643	0.996
chr18	67021819	67346439	324622	Loss	0.000608407	0.996
chr16	13053029	13362847	309820	Loss	0.0128084	0.996
chr11	105003673	105328807	325136	Loss	0.000708023	0.996
chr13	42071353	42245842	174491	Gain	0.0428052	0.9965
chr3	141188400	141376139	187741	Gain	0.0013101	0.9965
chr13	87127159	87317978	190821	Gain	0.0150632	0.9965
chr2	99203378	99403794	200418	Gain	0.0314804	0.9965
chr7	3033609	3196569	162962	Gain	0.0218635	0.9965
chr2	95533274	95715965	182693	Gain	0.0314804	0.9965
chr3	141648608	141817743	169137	Gain	0.0013101	0.9965
chr2	148631535	148829702	198169	Gain	0.0155531	0.9965
chr9	75044591	75202644	158055	Gain	0.0295474	0.9965
chr3	89196645	89367682	171039	Gain	0.0234456	0.9965
chr3	165030679	165212503	181826	Gain	0.0013101	0.9965
chr13	90695737	90884271	188536	Gain	0.0102944	0.9965
chr18	75026672	75328409	301739	Loss	0.000191149	0.9965
chr11	4885031	5184546	299517	Loss	0.0295474	0.9965
chr1	209765388	209930693	165307	Gain	0.011649	0.9965
chr13	85070002	85273222	203222	Gain	0.0150632	0.9965
chr3	169008325	169171618	163295	Gain	0.0023226	0.9965
chr18	34600448	34903859	303413	Loss	0.00141182	0.9965
chr7	10049993	10249583	199592	Gain	0.0218635	0.9965
chr20	18346194	18524691	178499	Gain	0.0145338	0.9965
chr2	146985188	147149041	163855	Gain	0.049089	0.9965
chr11	44632899	44915348	282451	Loss	0.0208064	0.9965
chr1	230745278	230947421	202145	Gain	0.0179843	0.9965
chr7	7158645	7353070	194427	Gain	0.0218635	0.9965
chr3	179580262	179773492	193232	Gain	0.000732976	0.9965
chr5	149477551	149669756	192207	Gain	0.0413305	0.9965
chr18	21391035	21692286	301253	Loss	0.00233746	0.9965
chr1	177968616	178127040	158426	Gain	0.0207575	0.9965
chr1	177766695	177968615	201922	Gain	0.0207575	0.9965
chr9	135880469	136080535	200068	Gain	0.0392257	0.9965
chr9	126756641	126943981	187342	Gain	0.00710295	0.9965
chr2	103356892	103528310	171420	Gain	0.049089	0.9965
chr5	150000146	150159922	159778	Gain	0.0413305	0.9965
chr3	135699878	135889795	189919	Gain	0.0023226	0.9965
chr13	57216918	57411513	194597	Gain	0.00451093	0.9965
chr18	9287340	9568315	280977	Loss	0.00233746	0.9965
chr11	78530721	78815951	285232	Loss	0.00131499	0.9965
chr13	56579414	56746835	167423	Gain	0.00451093	0.9965
chr7	26703565	26871964	168401	Gain	0.0218635	0.9965
chr2	95341700	95533273	191575	Gain	0.049089	0.9965
chr13	92578731	92753852	175123	Gain	0.0102944	0.9965
chr13	92392696	92572317	179623	Gain	0.0102944	0.9965
chr13	88292925	88496840	203917	Gain	0.0150632	0.9965
chr9	114857261	115058305	201046	Gain	0.0013101	0.9965
chr7	28310590	28506516	195928	Gain	0.0218635	0.9965
chr7	28508094	28708421	200329	Gain	0.0218635	0.9965
chr20	48279932	48480398	200468	Gain	0.000145464	0.9965
chr13	21160492	21336674	176184	Gain	0.0307143	0.9965
chr20	32798515	32972078	173565	Gain	0.00203077	0.9965
chr1	179753797	179925538	171743	Gain	0.0207575	0.9965
chr17	27638357	27831800	193445	Gain	0.0412326	0.9965
chr20	23653882	23836123	182243	Gain	0.0309077	0.9965
chr13	39098914	39292699	193787	Gain	0.0306693	0.9965
chr7	1778308	1954300	175994	Gain	0.0230702	0.9965
chr1	235525253	235701552	176301	Gain	0.00189251	0.9965
chr2	187316458	187494852	178396	Gain	0.0123434	0.9965
chr13	104043975	104220591	176618	Gain	0.0309077	0.9965
chr1	210095673	210291309	195638	Gain	0.00616225	0.9965
chr13	69791694	69985731	194039	Gain	0.00684222	0.9965
chr17	38067020	38261209	194191	Gain	0.0154219	0.9965
chr13	69208374	69370044	161672	Gain	0.00684222	0.9965
chr7	1575377	1768000	192625	Gain	0.0230702	0.9965
chr21	33333332	33507803	174473	Gain	0.0413305	0.9965
chr9	121653979	121838506	184529	Gain	0.0109391	0.9965
chr20	23402775	23576821	174048	Gain	0.0230702	0.9965
chr19	32798466	32973618	175154	Gain	0.0109391	0.9965
chr1	231174432	231356301	181871	Gain	0.00639857	0.9965
chr1	211479237	211646264	167029	Gain	0.00639857	0.9965
chr20	31680334	31872983	192651	Gain	0.00203077	0.9965
chr13	47198156	47374717	176563	Gain	0.0307143	0.9965
chr13	46407443	46577959	170518	Gain	0.0307143	0.9965
chr17	33084070	33262382	178314	Gain	0.0154219	0.9965
chr20	57136138	57295088	158952	Gain	0.000346926	0.9965
chr13	29584512	29756369	171859	Gain	0.00684222	0.9965
chr9	105328166	105487844	159680	Gain	0.0109391	0.9965
chr13	103132157	103328086	195931	Gain	0.0309077	0.9965
chr10	103556652	103857128	300478	Loss	0.0412326	0.9965
chr5	176493263	176776652	283391	Loss	0.0484222	0.9965
chr20	32514061	32692280	178221	Gain	0.00203077	0.9965
chr13	102443290	102624418	181130	Gain	0.0309077	0.9965
chr13	74519275	74686283	167010	Gain	0.00626668	0.9965
chr13	24851040	25049148	198110	Gain	0.0307143	0.9965
chr11	63774301	64064726	290427	Loss	0.00011479	0.9965
chr2	145743610	145931406	187798	Gain	0.049089	0.9965
chr19	33889369	34065833	176466	Gain	0.047587	0.9965
chr21	35715718	35907175	191459	Gain	0.0413305	0.9965
chr3	177314409	177508621	194214	Gain	0.00226554	0.9965
chr9	129242672	129441517	198847	Gain	0.018092	0.9965
chr3	136204437	136392224	187789	Gain	0.0023226	0.9965
chr2	181352501	181536659	184160	Gain	0.0123434	0.9965
chr5	134831235	135029703	198470	Gain	0.0413305	0.9965
chr9	119369192	119572217	203027	Gain	0.0109391	0.9965
chr13	57024915	57204534	179621	Gain	0.00685872	0.9965
chr2	180989284	181178290	189008	Gain	0.0123434	0.9965
chr7	14730796	14933428	202634	Gain	0.0102944	0.9965
chr18	76426055	76731826	305773	Loss	0.000109635	0.9965
chr2	165247718	165428591	180875	Gain	0.0155531	0.9965
chr1	206789794	206961466	171674	Gain	0.00468996	0.9965
chr2	139217998	139387710	169714	Gain	0.049089	0.9965
chr1	188793473	188967944	174473	Gain	0.0207575	0.9965
chr13	21424404	21597714	173312	Gain	0.0428835	0.9965
chr11	116098315	116402750	304437	Loss	0.000708023	0.9965
chr2	179296482	179476151	179671	Gain	0.0123434	0.9965
chr1	166262124	166456386	194264	Gain	0.0310969	0.9965
chr13	36148057	36311118	163063	Gain	0.0306693	0.9965
chr13	65877596	66067452	189858	Gain	0.00684491	0.9965
chr2	171805870	171976294	170426	Gain	0.0123434	0.9965
chr13	67527659	67694693	167036	Gain	0.00684491	0.9965
chr17	58869356	59034421	165067	Gain	0.0298204	0.9965
chr13	48690927	48886829	195904	Gain	0.00685872	0.9965
chr20	58424753	58603617	178866	Gain	0.000673974	0.9965
chr17	60122324	60317579	195257	Gain	0.0298204	0.9965
chr9	124875022	125068857	193837	Gain	0.0109391	0.9965
chr1	158512449	158680658	168211	Gain	0.0310969	0.9965
chr20	21241005	21444383	203380	Gain	0.0106317	0.9965
chr7	26061860	26222452	160594	Gain	0.0151315	0.9965
chr21	17846492	18008194	161704	Gain	0.0230953	0.9965
chr17	66678300	66836098	157800	Gain	0.0353679	0.9965
chr13	48334097	48531676	197581	Gain	0.0149901	0.9965
chr5	147678849	147982295	303448	Loss	0.0238422	0.9965
chr3	97037004	97217084	180082	Gain	0.0349244	0.9965
chr20	41617133	41782312	165181	Gain	0.000297863	0.9965
chr3	127929995	128109940	179947	Gain	0.0040814	0.9965
chr9	99002855	99168058	165205	Gain	0.0040814	0.9965
chr2	119744567	119945952	201387	Gain	0.0496022	0.9965
chr3	195746771	195924172	177403	Gain	0.000406968	0.9965
chr20	44479794	44683085	203293	Gain	0.000297863	0.9965
chr18	59054412	59333216	278806	Loss	0.000328366	0.9965
chr18	11746664	12048802	302140	Loss	0.00371171	0.9965
chr19	28980282	29173823	193543	Gain	0.018092	0.9965
chr3	125934117	126097848	163733	Gain	0.0122297	0.9965
chr13	74057915	74249619	191706	Gain	0.0093328	0.9965
chr20	6930728	7118372	187646	Gain	0.0262133	0.9965
chr2	208334325	208500333	166010	Gain	0.038105	0.9965
chr9	110905202	111062851	157651	Gain	0.0040814	0.9965
chr20	12465694	12639516	173824	Gain	0.0262133	0.9965
chr20	40168754	40353798	185046	Gain	0.000586425	0.9965
chr20	51892103	52055949	163848	Gain	0.000255176	0.9965
chr9	93754830	93951547	196719	Gain	0.018092	0.9965
chr20	10123425	10304540	181117	Gain	0.0270241	0.9965
chr2	103182760	103356891	174133	Gain	0.0496022	0.9965
chr13	94981553	95164549	182998	Gain	0.0216849	0.9965
chr9	100497999	100688915	190918	Gain	0.0040814	0.9965
chr13	81608537	81802641	194106	Gain	0.0149901	0.9965
chr20	42253506	42416875	163371	Gain	0.000297863	0.9965
chr9	38389600	38569156	179558	Gain	0.038105	0.9965
chr9	111560215	111717909	157696	Gain	0.0040814	0.9965
chr20	60276963	60467272	190311	Gain	0.000403242	0.9965
chr2	218258531	218451833	193304	Gain	0.0198618	0.9965
chr20	30759991	30955353	195364	Gain	0.00358101	0.9965
chr20	55682388	55844382	161996	Gain	0.000977654	0.9965
chr11	66842470	67149024	306556	Loss	6.22e-05	0.9965
chr3	126099848	126270911	171065	Gain	0.0122297	0.9965
chr13	81060103	81244085	183984	Gain	0.0102245	0.9965
chr13	80851108	81028997	177891	Gain	0.0102245	0.9965
chr20	55496772	55680423	183653	Gain	0.000509244	0.9965
chr20	11293228	11470255	177029	Gain	0.0184492	0.9965
chr20	52808779	52994434	185657	Gain	0.000509244	0.9965
chr18	25526413	25828973	302562	Loss	0.00117543	0.9965
chr2	191024085	191216108	192025	Gain	0.0246357	0.9965
chr2	160697636	160867058	169424	Gain	0.00961489	0.9965
chr13	28793482	28985366	191886	Gain	0.0102162	0.9965
chr2	160535474	160697635	162163	Gain	0.00961489	0.9965
chr7	31116168	31312818	196652	Gain	0.0159988	0.9965
chr1	201286319	201455778	169461	Gain	0.00381537	0.9965
chr13	27791847	27963890	172045	Gain	0.00953436	0.9965
chr20	51515634	51707780	192148	Gain	0.000297863	0.9965
chr19	29178737	29337352	158617	Gain	0.018092	0.9965
chr1	238918744	239081747	163005	Gain	0.00114975	0.9965
chr1	239081748	239253606	171860	Gain	0.00114975	0.9965
chr2	209248804	209452302	203500	Gain	0.038105	0.9965
chr20	42495338	42682019	186683	Gain	0.000297863	0.9965
chr20	36704332	36868816	164486	Gain	0.0011115	0.9965
chr13	32731438	32930644	199208	Gain	0.0216153	0.9965
chr2	202258469	202422866	164399	Gain	0.038105	0.9965
chr13	29075781	29245683	169904	Gain	0.0102162	0.9965
chr3	117626868	117802894	176028	Gain	0.0208064	0.9965
chr2	191839960	192015072	175114	Gain	0.0246357	0.9965
chr18	40543413	40831691	288280	Loss	0.000442116	0.9965
chr2	212426805	212588626	161823	Gain	0.0198618	0.9965
chr2	196647156	196833350	186196	Gain	0.0246357	0.9965
chr13	45831182	46012301	181121	Gain	0.0216367	0.9965
chr1	192141837	192310247	168412	Gain	0.011649	0.9965
chr2	212596916	212798237	201323	Gain	0.0198618	0.9965
chr20	4851843	5024034	172193	Gain	0.0184492	0.9965
chr5	105029214	105311315	282103	Loss	0.035904	0.9965
chr1	191497548	191658816	161270	Gain	0.011649	0.9965
chr13	27225105	27393769	168666	Gain	0.00953436	0.9965
chr7	36851154	37040366	189214	Gain	0.0442581	0.9965
chr13	43119337	43297593	178258	Gain	0.0216367	0.9965
chr1	189785984	189958100	172118	Gain	0.011649	0.9965
chr5	150168890	150470575	301687	Loss	0.0362889	0.9965
chr20	55194543	55361010	166469	Gain	0.000509244	0.9965
chr13	75805152	75983537	178387	Gain	0.00291528	0.9965
chr20	38142727	38303345	160620	Gain	0.000586425	0.9965
chr2	88493101	88659587	166488	Gain	0.0496022	0.9965
chr11	129018990	129322211	303223	Loss	0.00022433	0.9965
chr5	132272357	132465186	192831	Gain	0.0413305	0.9965
chr2	214725734	214887022	161290	Gain	0.0198618	0.9965
chr11	38742269	39023750	281483	Loss	0.0208064	0.9965
chr18	30480119	30776791	296674	Loss	0.00293901	0.9965
chr1	226154669	226327068	172401	Gain	0.0136602	0.9965
chr2	199293826	199456781	162957	Gain	0.015695	0.9965
chr13	90252000	90425964	173966	Gain	0.0150632	0.9965
chr3	187974733	188163950	189219	Gain	0.000732976	0.9965
chr17	40559949	40737756	177809	Gain	0.0451248	0.9965
chr3	150218615	150388598	169985	Gain	0.0013101	0.9965
chr1	245684822	245880921	196101	Gain	0.00744067	0.9965
chr13	78460689	78657699	197012	Gain	0.00450528	0.9965
chr3	196974183	197133081	158900	Gain	0.000732976	0.9965
chr17	56982452	57171146	188696	Gain	0.0451248	0.9965
chr13	58491198	58694867	203671	Gain	0.00291634	0.9965
chr1	235326580	235519053	192475	Gain	0.00308367	0.9965
chr10	104593245	104882491	289248	Loss	0.0458959	0.9965
chr9	88073146	88248215	175071	Gain	0.018092	0.9965
chr9	88254012	88441828	187818	Gain	0.018092	0.9965
chr3	162961220	163159978	198760	Gain	0.0013101	0.9965
chr20	12045370	12247006	201638	Gain	0.0184492	0.9965
chr11	69294139	69572684	278547	Loss	0.000212464	0.9965
chr7	30649672	30853698	204028	Gain	0.0323309	0.9965
chr11	46814956	47120209	305255	Loss	0.0074303	0.9965
chr9	134358658	134536016	177360	Gain	0.018092	0.9965
chr13	75062388	75224986	162600	Gain	0.00414403	0.9965
chr20	59786224	59969532	183310	Gain	0.000403242	0.9965
chr1	244938499	245110231	171734	Gain	0.00744067	0.9965
chr13	75600055	75795904	195851	Gain	0.00414403	0.9965
chr5	131029683	131227499	197818	Gain	0.0413305	0.9965
chr3	122780413	122940376	159965	Gain	0.0122297	0.9965
chr7	34914906	35095244	180340	Gain	0.032006	0.9965
chr20	16345278	16506015	160739	Gain	0.00414687	0.9965
chr19	32375148	32672694	297548	Loss	0.0325174	0.9965
chr11	43939764	44245659	305897	Loss	0.0208064	0.9965
chr11	76899116	77205237	306123	Loss	0.00127277	0.9965
chr5	132081897	132272356	190461	Gain	0.0413305	0.9965
chr1	222113181	222286576	173397	Gain	0.00744067	0.9965
chr3	143272256	143435704	163450	Gain	0.0013101	0.9965
chr13	47640886	47793929	153045	Gain	0.0307143	0.997
chr7	33196260	33352274	156016	Gain	0.032006	0.997
chr3	162825977	162961219	135244	Gain	0.0013101	0.997
chr1	153061338	153215145	153809	Gain	0.0458959	0.997
chr2	205970804	206112444	141642	Gain	0.038105	0.997
chr11	82984904	83259479	274577	Loss	0.000708023	0.997
chr3	144036284	144185616	149334	Gain	0.0013101	0.997
chr20	46917765	47053591	135828	Gain	0.000145464	0.997
chr17	80361050	80502135	141087	Gain	0.0412326	0.997
chr20	10648558	10786911	138355	Gain	0.0367153	0.997
chr9	35440434	35591039	150607	Gain	0.038105	0.997
chr11	79452344	79721187	268845	Loss	0.000708023	0.997
chr13	35911778	36058038	146262	Gain	0.0216153	0.997
chr7	34204208	34359832	155626	Gain	0.032006	0.997
chr20	58025422	58175987	150567	Gain	0.000346926	0.997
chr13	92923125	93080695	157572	Gain	0.0150632	0.997
chr13	31578220	31724793	146575	Gain	0.0216153	0.997
chr7	33809158	33954166	145010	Gain	0.032006	0.997
chr20	33943675	34093757	150084	Gain	0.0011115	0.997
chr19	30635473	30768475	133004	Gain	0.00653884	0.997
chr13	32343998	32490930	146934	Gain	0.0216153	0.997
chr1	238215703	238357077	141376	Gain	0.00189251	0.997
chr3	88214146	88348460	134316	Gain	0.0132817	0.997
chr13	103338230	103491627	153399	Gain	0.0309077	0.997
chr13	90096050	90244185	148137	Gain	0.0150632	0.997
chr2	209618773	209771310	152539	Gain	0.038105	0.997
chr11	68996443	69264370	267929	Loss	0.000212464	0.997
chr3	175992531	176144467	151938	Gain	0.000732976	0.997
chr13	102307358	102441668	134312	Gain	0.0309077	0.997
chr3	188938886	189094307	155423	Gain	0.000732976	0.997
chr20	51076274	51218469	142197	Gain	0.000297863	0.997
chr3	148592444	148735111	142669	Gain	0.0013101	0.997
chr7	136341234	136485095	143863	Gain	0.0364145	0.997
chr13	84513321	84668038	154719	Gain	0.0216849	0.997
chr17	43059072	43199763	140693	Gain	0.0451248	0.997
chr7	13873813	14014665	140854	Gain	0.0102944	0.997
chr7	26491234	26624127	132895	Gain	0.0151315	0.997
chr11	125287501	125560661	273162	Loss	0.00127277	0.997
chr13	83264091	83398700	134611	Gain	0.00684491	0.997
chr13	102628015	102781918	153905	Gain	0.0218635	0.997
chr9	15862959	16004160	141203	Gain	0.0314804	0.997
chr9	1602778	1738753	135977	Gain	0.038105	0.997
chr7	5265956	5399742	133788	Gain	0.0151315	0.997
chr13	94075239	94232044	156807	Gain	0.0216849	0.997
chr9	16063403	16219480	156079	Gain	0.0314804	0.997
chr1	169583197	169724779	141584	Gain	0.0207575	0.997
chr13	62429394	62563130	133738	Gain	0.0102245	0.997
chr13	84350204	84490959	140757	Gain	0.0216849	0.997
chr7	12026323	12178933	152612	Gain	0.0218635	0.997
chr1	189119685	189256791	137108	Gain	0.0207575	0.997
chr13	48533814	48690926	157114	Gain	0.0102245	0.997
chr1	188972582	189112184	139604	Gain	0.0207575	0.997
chr7	16026003	16169658	143657	Gain	0.0151315	0.997
chr8	18668483	18940622	272141	Loss	0.0433759	0.997
chr13	82160317	82302689	142374	Gain	0.0102245	0.997
chr5	128303407	128577385	273980	Loss	0.0404556	0.997
chr19	47244862	47518851	273991	Loss	0.0128084	0.997
chr9	124719179	124854550	135373	Gain	0.018092	0.997
chr13	69642573	69791451	148880	Gain	0.00684222	0.997
chr11	47394318	47662781	268465	Loss	0.0074303	0.997
chr17	63876900	64031719	154821	Gain	0.0353679	0.997
chr13	29245684	29384657	138975	Gain	0.00684222	0.997
chr13	19590336	19725096	134762	Gain	0.0150632	0.997
chr17	64048788	64189792	141006	Gain	0.0353679	0.997
chr17	28811300	28952028	140730	Gain	0.0412326	0.997
chr13	37704055	37849502	145449	Gain	0.0216367	0.997
chr7	35900150	36042221	142073	Gain	0.0442581	0.997
chr3	178784534	178928091	143559	Gain	0.000732976	0.997
chr20	47593860	47739814	145956	Gain	0.000145464	0.997
chr7	35526377	35661868	135493	Gain	0.0442581	0.997
chr3	197133083	197281338	148257	Gain	0.000732976	0.997
chr11	73276872	73542259	265389	Loss	0.000212464	0.997
chr1	225070169	225213553	143386	Gain	0.0136602	0.997
chr20	22661449	22803908	142461	Gain	0.0107578	0.997
chr17	77095143	77234671	139530	Gain	0.0412326	0.997
chr7	22691865	22833821	141958	Gain	0.0151315	0.997
chr9	25780015	25916353	136340	Gain	0.038105	0.997
chr12	15287477	15557300	269825	Loss	0.047587	0.997
chr1	200857774	200998403	140631	Gain	0.00744067	0.997
chr17	28205736	28341880	136146	Gain	0.0235086	0.997
chr20	6164781	6311968	147189	Gain	0.0178397	0.997
chr9	74878505	75032438	153935	Gain	0.0295474	0.997
chr5	142873031	143012858	139829	Gain	0.0413305	0.997
chr9	117916679	118067965	151288	Gain	0.0040814	0.997
chr18	40985934	41249240	263308	Loss	0.000442116	0.997
chr5	129874850	130008493	133645	Gain	0.0413305	0.997
chr19	31423895	31557426	133533	Gain	0.0248604	0.997
chr2	114293991	114428705	134716	Gain	0.0496022	0.997
chr1	192989259	193126441	137184	Gain	0.00616225	0.997
chr1	181030834	181171872	141040	Gain	0.011649	0.997
chr17	65882899	66015962	133065	Gain	0.0235086	0.997
chr1	174311124	174444551	133429	Gain	0.0207575	0.997
chr20	17000371	17157885	157516	Gain	0.00437242	0.997
chr3	176270852	176405846	134996	Gain	0.000406968	0.997
chr7	30517096	30649671	132577	Gain	0.0230702	0.997
chr9	83072458	83223688	151232	Gain	0.0295474	0.997
chr13	42759778	42902285	142509	Gain	0.0306693	0.997
chr17	30634363	30784033	149672	Gain	0.0279113	0.997
chr2	198761342	198894511	133171	Gain	0.015695	0.997
chr13	76338930	76478770	139842	Gain	0.00291528	0.997
chr9	125673677	125824127	150452	Gain	0.0122297	0.997
chr9	87896173	88042223	146052	Gain	0.0295474	0.997
chr1	171434437	171578075	143640	Gain	0.0207575	0.997
chr9	100005128	100158814	153688	Gain	0.0040814	0.997
chr13	98035303	98175247	139946	Gain	0.0428835	0.997
chr18	59574157	59847526	273371	Loss	0.000555643	0.997
chr5	169999407	170145382	145977	Gain	0.0230953	0.997
chr20	30441983	30578467	136486	Gain	0.00358101	0.997
chr1	195649242	195801228	151988	Gain	0.011649	0.997
chr13	56013233	56158437	145206	Gain	0.00451093	0.997
chr20	54377395	54518992	141599	Gain	0.000509244	0.997
chr2	165099766	165247717	147953	Gain	0.0155531	0.997
chr5	144496296	144649752	153458	Gain	0.0413305	0.997
chr17	58102750	58260370	157622	Gain	0.0298204	0.997
chr20	21952111	22107161	155052	Gain	0.0158	0.997
chr9	23950904	24105629	154727	Gain	0.0246357	0.997
chr20	58175988	58329599	153613	Gain	0.000673974	0.997
chr17	57889746	58027628	137884	Gain	0.0298204	0.997
chr2	156434495	156580707	146214	Gain	0.0155531	0.997
chr20	41144168	41295294	151128	Gain	0.000586425	0.997
chr2	98302554	98456615	154063	Gain	0.049089	0.997
chr13	25353641	25509384	155745	Gain	0.0428835	0.997
chr2	221290228	221447084	156858	Gain	0.0198618	0.997
chr1	233835699	233981596	145899	Gain	0.00308367	0.997
chr20	53874081	54009670	135591	Gain	0.000509244	0.997
chr9	86517541	86674352	156813	Gain	0.0295474	0.997
chr5	133012034	133160254	148222	Gain	0.0413305	0.997
chr20	19157634	19308025	150393	Gain	0.00466748	0.997
chr13	59625180	59778800	153622	Gain	0.00450528	0.997
chr5	149672775	149810923	138150	Gain	0.0413305	0.997
chr18	54049509	54322418	272911	Loss	0.000608407	0.997
chr1	211693856	211832965	139111	Gain	0.00639857	0.997
chr1	228811802	228956246	144446	Gain	0.0179843	0.997
chr2	221779863	221927851	147990	Gain	0.0198618	0.997
chr7	32135922	32272859	136939	Gain	0.0227997	0.997
chr2	204021437	204173909	152474	Gain	0.0198618	0.997
chr1	209932122	210068117	135997	Gain	0.011649	0.997
chr10	114492899	114756284	263387	Loss	0.0279113	0.997
chr16	12611373	12879710	268339	Loss	0.0230953	0.997
chr9	105487845	105641664	153821	Gain	0.0040814	0.997
chr7	7455912	7593139	137229	Gain	0.0230702	0.997
chr9	84380739	84521380	140643	Gain	0.0295474	0.997
chr2	215001226	215145765	144541	Gain	0.0198618	0.997
chr2	103762342	103896619	134279	Gain	0.0496022	0.997
chr2	185277399	185413042	135645	Gain	0.0123434	0.997
chr2	185901954	186039473	137521	Gain	0.0123434	0.997
chr5	147985415	148254107	268694	Loss	0.0238422	0.997
chr3	135979568	136132281	152715	Gain	0.0023226	0.997
chr20	54221725	54375867	154144	Gain	0.000509244	0.997
chr1	214635647	214774522	138877	Gain	0.00468996	0.997
chr9	107994165	108127884	133721	Gain	0.0040814	0.997
chr19	33022456	33283777	261323	Loss	0.0325174	0.9975
chr18	2525442	2783455	258015	Loss	0.011883	0.9975
chr1	160537204	160668408	131206	Gain	0.0207575	0.9975
chr11	126938336	127196755	258421	Loss	0.00127277	0.9975
chr16	18808403	19069833	261432	Loss	0.0413305	0.9975
chr20	10478939	10611063	132126	Gain	0.0262133	0.9975
chr17	20994730	21127058	132330	Gain	0.0415716	0.9975
chr18	6764634	7022495	257863	Loss	0.00147251	0.9975
chr5	127627830	127888093	260265	Loss	0.0404556	0.9975
chr20	35393624	35524811	131189	Gain	0.00203077	0.9975
chr8	20664483	20927020	262539	Loss	0.0310569	0.9975
chr11	7612282	7869529	257249	Loss	0.047587	0.9975
chr13	70696501	70828185	131686	Gain	0.00684222	0.9975
chr11	87485348	87745806	260460	Loss	0.00127277	0.9975
chr20	33674460	33805276	130818	Gain	0.0011115	0.9975
chr13	75467315	75599117	131804	Gain	0.00414403	0.9975
chr11	73752400	74012087	259689	Loss	6.68e-05	0.9975
chr11	6346478	6608564	262088	Loss	0.0295474	0.9975
chr11	61913778	62173206	259430	Loss	0.00011479	0.9975
chr10	104882493	105144942	262451	Loss	0.0179843	0.9975
chr11	87242644	87485347	242705	Loss	0.00127277	0.998
chr20	4104510	4228327	123819	Gain	0.0270241	0.998
chr13	59785716	59887338	101624	Gain	0.00450528	0.998
chr9	101562915	101667626	104713	Gain	0.0040814	0.998
chr2	200185915	200293237	107324	Gain	0.015695	0.998
chr13	20004674	20105322	100650	Gain	0.0216849	0.998
chr20	13845726	13965125	119401	Gain	0.0270241	0.998
chr20	30644121	30727658	83539	Gain	0.00358101	0.998
chr3	59539911	59662525	122616	Gain	0.00837686	0.998
chr20	30229255	30332465	103212	Gain	0.00358101	0.998
chr13	19842776	19935721	92947	Gain	0.0216849	0.998
chr20	13447004	13557507	110505	Gain	0.0270241	0.998
chr13	19739166	19834074	94910	Gain	0.0216849	0.998
chr20	3296040	3398310	102272	Gain	0.0270241	0.998
chr13	19464042	19589531	125491	Gain	0.0216849	0.998
chr13	47793930	47890654	96726	Gain	0.0216849	0.998
chr18	42977086	43225696	248612	Loss	0.00129615	0.998
chr1	243451344	243555218	103876	Gain	0.00744067	0.998
chr2	108313145	108437186	124043	Gain	0.0496022	0.998
chr5	59709753	59796663	86912	Gain	0.0325174	0.998
chr19	33563127	33788842	225717	Loss	0.0325174	0.998
chr1	202209967	202298108	88143	Gain	0.00744067	0.998
chr1	201005555	201131277	125724	Gain	0.00744067	0.998
chr1	231702097	231816170	114075	Gain	0.00308367	0.998
chr17	30784034	30880647	96615	Gain	0.0279113	0.998
chr2	106643808	106741432	97626	Gain	0.0496022	0.998
chr2	197610703	197700960	90259	Gain	0.015695	0.998
chr1	243360468	243451343	90877	Gain	0.00744067	0.998
chr3	59118978	59221063	102087	Gain	0.0325174	0.998
chr9	132058299	132162469	104172	Gain	0.018092	0.998
chr17	55377920	55480077	102159	Gain	0.0451248	0.998
chr19	36655407	36892164	236759	Loss	0.0325174	0.998
chr13	83486857	83605423	118568	Gain	0.0150162	0.998
chr2	200500531	200604663	104134	Gain	0.0451248	0.998
chr1	204284106	204382588	98484	Gain	0.00744067	0.998
chr17	79923718	80024316	100600	Gain	0.0279113	0.998
chr10	59146467	59385204	238739	Loss	0.0496022	0.998
chr1	242062845	242190729	127886	Gain	0.00744067	0.998
chr20	2062317	2158245	95930	Gain	0.0270241	0.998
chr13	75338360	75466471	128113	Gain	0.00414403	0.998
chr20	2517121	2613594	96475	Gain	0.0270241	0.998
chr9	134275463	134358657	83196	Gain	0.018092	0.998
chr1	204989911	205104801	114892	Gain	0.00744067	0.998
chr17	46707808	46791801	83995	Gain	0.0451248	0.998
chr13	71665278	71785349	120073	Gain	0.00414403	0.998
chr13	75230388	75328649	98263	Gain	0.00414403	0.998
chr11	95038464	95267899	229437	Loss	0.00127277	0.998
chr11	101179728	101424575	244849	Loss	0.00127277	0.998
chr13	73402822	73494401	91581	Gain	0.00414403	0.998
chr17	65764905	65882719	117816	Gain	0.0235086	0.998
chr2	199490529	199583657	93130	Gain	0.015695	0.998
chr1	242629908	242757971	128065	Gain	0.00744067	0.998
chr17	42854208	42941467	87261	Gain	0.0451248	0.998
chr11	126446512	126689553	243043	Loss	0.00127277	0.998
chr17	27831801	27954177	122378	Gain	0.0235086	0.998
chr9	89437344	89555673	118331	Gain	0.018092	0.998
chr9	89340905	89437212	96309	Gain	0.018092	0.998
chr19	32682475	32798465	115992	Gain	0.0248604	0.998
chr2	165491225	165598513	107290	Gain	0.00961489	0.998
chr20	7553344	7681541	128199	Gain	0.0367153	0.998
chr1	201151116	201271982	120868	Gain	0.00381537	0.998
chr20	8799856	8920070	120216	Gain	0.0178397	0.998
chr20	6070583	6164622	94041	Gain	0.0178397	0.998
chr2	159936001	160061216	125217	Gain	0.00961489	0.998
chr9	107503334	107602590	99258	Gain	0.0040814	0.998
chr19	31936411	32027414	91005	Gain	0.0248604	0.998
chr11	65737684	65965382	227700	Loss	1.65e-05	0.998
chr2	160867059	160983345	116288	Gain	0.00961489	0.998
chr1	213253701	213371127	117428	Gain	0.00381537	0.998
chr7	33694981	33809157	114178	Gain	0.0442581	0.998
chr20	20082067	20192598	110533	Gain	0.00118701	0.998
chr2	116402984	116529287	126305	Gain	0.0496022	0.998
chr20	19884961	19977192	92233	Gain	0.00118701	0.998
chr13	42902286	43014464	112180	Gain	0.0216367	0.998
chr20	19711365	19840115	128752	Gain	0.00118701	0.998
chr9	104049636	104163006	113372	Gain	0.0040814	0.998
chr13	43014795	43114692	99899	Gain	0.0216367	0.998
chr9	98439240	98550467	111229	Gain	0.0248604	0.998
chr13	27686726	27779851	93127	Gain	0.00953436	0.998
chr11	64299330	64542901	243573	Loss	3.21e-05	0.998
chr20	33570712	33674416	103706	Gain	0.0011115	0.998
chr2	187528504	187637586	109084	Gain	0.0246357	0.998
chr13	26618360	26716966	98608	Gain	0.0216153	0.998
chr20	18538093	18658992	120901	Gain	0.0148636	0.998
chr13	31408076	31531009	122935	Gain	0.0216153	0.998
chr11	60128322	60367038	238718	Loss	3.81e-06	0.998
chr3	141022487	141111750	89265	Gain	0.0038677	0.998
chr20	35179496	35267038	87544	Gain	0.0011115	0.998
chr11	61046876	61286964	240090	Loss	7.4e-06	0.998
chr3	144387439	144475489	88052	Gain	0.0038677	0.998
chr20	34094549	34182724	88177	Gain	0.0011115	0.998
chr20	50288953	50382620	93669	Gain	0.000297863	0.998
chr20	18659537	18777077	117542	Gain	0.00999222	0.998
chr2	196840798	196939554	98758	Gain	0.0246357	0.998
chr20	8922729	9007214	84487	Gain	0.0178397	0.998
chr13	30271528	30373171	101645	Gain	0.0149842	0.998
chr13	26374173	26474188	100017	Gain	0.0216153	0.998
chr20	16670634	16774816	104184	Gain	0.00997907	0.998
chr2	197175982	197286613	110633	Gain	0.009863	0.998
chr2	164918873	165039981	121110	Gain	0.00961489	0.998
chr7	126295941	126392025	96086	Gain	0.0499872	0.998
chr1	238024021	238137648	113629	Gain	0.00114975	0.998
chr13	48215101	48326146	111047	Gain	0.0149901	0.998
chr1	168290645	168375973	85330	Gain	0.0350386	0.998
chr2	119648815	119743801	94988	Gain	0.0496022	0.998
chr13	93094174	93178205	84033	Gain	0.0216849	0.998
chr3	97217571	97331077	113508	Gain	0.0349244	0.998
chr5	147434057	147673733	239678	Loss	0.0238422	0.998
chr13	34656572	34742419	85849	Gain	0.0149842	0.998
chr11	86555189	86795384	240197	Loss	0.00127277	0.998
chr20	11037739	11148917	111180	Gain	0.0262133	0.998
chr20	44702167	44791972	89807	Gain	0.000297863	0.998
chr20	10923996	11033800	109806	Gain	0.0262133	0.998
chr20	24935719	25065518	129801	Gain	0.0216367	0.998
chr13	48078043	48208487	130446	Gain	0.0149901	0.998
chr1	229821753	229922367	100616	Gain	0.0179843	0.998
chr20	41989206	42092197	102993	Gain	0.000297863	0.998
chr9	118070260	118173997	103739	Gain	0.0040814	0.998
chr9	100692935	100823084	130151	Gain	0.0040814	0.998
chr13	84668039	84779874	111837	Gain	0.0216849	0.998
chr20	30052905	30154237	101334	Gain	0.00358101	0.998
chr13	93692694	93813491	120799	Gain	0.0216849	0.998
chr5	148569683	148819291	249610	Loss	0.0238422	0.998
chr11	34276154	34530172	254020	Loss	0.0349244	0.998
chr20	41786039	41910016	123979	Gain	0.000297863	0.998
chr9	125068858	125154313	85457	Gain	0.0040814	0.998
chr7	36751854	36850413	98561	Gain	0.0442581	0.998
chr2	114428706	114516493	87789	Gain	0.0496022	0.998
chr9	117829449	117916008	86561	Gain	0.0040814	0.998
chr13	45743920	45831181	87263	Gain	0.0216367	0.998
chr20	13198312	13304816	106506	Gain	0.0262133	0.998
chr9	112484136	112585874	101740	Gain	0.0040814	0.998
chr17	31838203	31935821	97620	Gain	0.0353679	0.998
chr20	5982605	6070440	87837	Gain	0.0178397	0.998
chr20	12649066	12750806	101742	Gain	0.0262133	0.998
chr11	33841740	34092762	251024	Loss	0.0349244	0.998
chr2	122479610	122574850	95242	Gain	0.0496022	0.998
chr20	12790724	12919860	129138	Gain	0.0262133	0.998
chr20	22967949	23060257	92310	Gain	0.0158	0.998
chr17	35093534	35207554	114022	Gain	0.0353679	0.998
chr13	74249827	74378258	128433	Gain	0.0093328	0.998
chr20	10369582	10472593	103013	Gain	0.0262133	0.998
chr13	73929289	74056605	127318	Gain	0.0093328	0.998
chr13	73825017	73921553	96538	Gain	0.0093328	0.998
chr20	24558667	24681352	122687	Gain	0.0216367	0.998
chr20	24697044	24821388	124346	Gain	0.0216367	0.998
chr1	227007183	227112972	105791	Gain	0.0310969	0.998
chr1	164945827	165036995	91170	Gain	0.0310969	0.998
chr1	164825008	164945515	120509	Gain	0.0310969	0.998
chr1	166456477	166579183	122708	Gain	0.0310969	0.998
chr12	14218591	14463829	245240	Loss	0.047587	0.998
chr18	36611282	36849277	237997	Loss	0.00223457	0.998
chr5	169628810	169755109	126301	Gain	0.0230953	0.998
chr20	20816899	20900617	83720	Gain	0.015467	0.998
chr1	156304329	156397981	93654	Gain	0.0310969	0.998
chr17	60580395	60695995	115602	Gain	0.0298204	0.998
chr5	169444364	169537129	92767	Gain	0.0230953	0.998
chr21	35525016	35647853	122839	Gain	0.0230953	0.998
chr20	21019305	21115141	95838	Gain	0.0221538	0.998
chr18	44803843	45032438	228597	Loss	0.00223457	0.998
chr13	36058039	36144888	86851	Gain	0.0306693	0.998
chr7	14949314	15061958	112646	Gain	0.0151315	0.998
chr13	36314722	36399658	84938	Gain	0.0306693	0.998
chr1	208140164	208264900	124738	Gain	0.00616225	0.998
chr13	26080503	26173653	93152	Gain	0.0306693	0.998
chr18	28396568	28628256	231690	Loss	0.00178401	0.998
chr7	16632234	16729095	96863	Gain	0.0151315	0.998
chr13	68915693	69004773	89082	Gain	0.00684222	0.998
chr13	36455226	36581733	126509	Gain	0.0306693	0.998
chr13	29457363	29583120	125759	Gain	0.00684222	0.998
chr18	5099315	5345623	246310	Loss	0.00515471	0.998
chr9	114479036	114563069	84035	Gain	0.0023226	0.998
chr19	41318306	41445949	127645	Gain	0.047587	0.998
chr18	50451398	50698925	247529	Loss	0.000191149	0.998
chr2	168558673	168669342	110671	Gain	0.0314804	0.998
chr19	34692587	34820320	127735	Gain	0.047587	0.998
chr9	115219142	115331815	112675	Gain	0.0023226	0.998
chr9	115100144	115218873	118731	Gain	0.0023226	0.998
chr3	169293102	169376289	83189	Gain	0.0023226	0.998
chr5	169869645	169992900	123257	Gain	0.0230953	0.998
chr21	34439736	34559624	119890	Gain	0.0230953	0.998
chr11	5262634	5511986	249354	Loss	0.0295474	0.998
chr1	191388293	191494552	106261	Gain	0.00616225	0.998
chr18	46605630	46839206	233578	Loss	0.00223457	0.998
chr13	80686672	80778849	92179	Gain	0.00684491	0.998
chr13	80563812	80678014	114204	Gain	0.00684491	0.998
chr13	79227167	79325738	98573	Gain	0.00684491	0.998
chr2	144868811	144989492	120683	Gain	0.049089	0.998
chr18	43867312	44115134	247824	Loss	0.00223457	0.998
chr13	78730023	78850176	120155	Gain	0.00684491	0.998
chr17	62279812	62407006	127196	Gain	0.0298204	0.998
chr13	82999488	83107795	108309	Gain	0.00684491	0.998
chr17	61526079	61624549	98472	Gain	0.0298204	0.998
chr17	25363800	25487139	123341	Gain	0.0310969	0.998
chr7	32746404	32832125	85723	Gain	0.0227997	0.998
chr20	35267039	35392347	125310	Gain	0.00203077	0.998
chr20	31176428	31267648	91222	Gain	0.00203077	0.998
chr20	31023756	31144462	120708	Gain	0.00203077	0.998
chr3	138177765	138273384	95621	Gain	0.00653884	0.998
chr20	33442250	33529260	87012	Gain	0.00203077	0.998
chr1	247065433	247155824	90393	Gain	0.00744067	0.998
chr20	45529426	45622854	93430	Gain	0.000145464	0.998
chr13	20645045	20775568	130525	Gain	0.0307936	0.998
chr19	31135677	31261896	126221	Gain	0.00653884	0.998
chr13	20527411	20642310	114901	Gain	0.0307936	0.998
chr20	22530602	22646117	115517	Gain	0.0227997	0.998
chr20	32050905	32140464	89561	Gain	0.00203077	0.998
chr9	123477729	123574946	97219	Gain	0.00653884	0.998
chr20	24079675	24172288	92615	Gain	0.0307936	0.998
chr5	179110851	179342959	232110	Loss	0.0484222	0.998
chr20	49024826	49136595	111771	Gain	0.000145464	0.998
chr20	16547367	16670633	123268	Gain	0.00650445	0.998
chr13	97071111	97192102	120993	Gain	0.0307143	0.998
chr13	47517452	47640885	123435	Gain	0.0307143	0.998
chr13	47382043	47506973	124932	Gain	0.0307143	0.998
chr20	48634777	48737514	102739	Gain	0.000145464	0.998
chr13	95920796	96046669	125875	Gain	0.0307143	0.998
chr13	96050927	96150044	99119	Gain	0.0307143	0.998
chr17	38846470	38943319	96851	Gain	0.0154219	0.998
chr7	1954733	2067726	112995	Gain	0.0230702	0.998
chr13	72176753	72264582	87831	Gain	0.00185447	0.998
chr13	69443435	69549955	106522	Gain	0.00684222	0.998
chr13	69549956	69642572	92618	Gain	0.00684222	0.998
chr1	238665223	238775825	110604	Gain	0.00616225	0.998
chr9	128858795	128987480	128687	Gain	0.018092	0.998
chr13	42657094	42754522	97430	Gain	0.0306693	0.998
chr17	38264854	38355832	90980	Gain	0.0154219	0.998
chr1	236802187	236897375	95190	Gain	0.00189251	0.998
chr17	65647063	65764904	117843	Gain	0.0154219	0.998
chr13	40118108	40242370	124264	Gain	0.0306693	0.998
chr1	240711695	240820515	108822	Gain	0.00468996	0.998
chr1	235859714	235976651	116939	Gain	0.00189251	0.998
chr20	31949054	32047627	98575	Gain	0.00203077	0.998
chr20	18816657	18911346	94691	Gain	0.00676991	0.998
chr9	17210039	17296543	86506	Gain	0.049089	0.998
chr20	16124097	16211852	87757	Gain	0.00619893	0.998
chr13	102179376	102307042	127668	Gain	0.0309077	0.998
chr1	238474116	238582573	108459	Gain	0.00189251	0.998
chr20	32693610	32791520	97912	Gain	0.00203077	0.998
chr13	74406342	74516339	109999	Gain	0.00626668	0.998
chr20	33031971	33132364	100395	Gain	0.00203077	0.998
chr13	70828720	70926407	97689	Gain	0.00450734	0.998
chr20	60806751	60923132	116383	Gain	0.000202502	0.998
chr9	71827381	71935577	108198	Gain	0.0295474	0.998
chr13	65184953	65300452	115501	Gain	0.00450528	0.998
chr17	33825497	33947104	121609	Gain	0.0235086	0.998
chr17	37147358	37253064	105708	Gain	0.0235086	0.998
chr2	155282824	155370862	88040	Gain	0.0155531	0.998
chr9	90905263	91011724	106463	Gain	0.018092	0.998
chr17	33947105	34045986	98883	Gain	0.0235086	0.998
chr7	34111660	34199097	87439	Gain	0.032006	0.998
chr13	72656240	72771046	114808	Gain	0.00262229	0.998
chr7	33954167	34059111	104946	Gain	0.032006	0.998
chr13	76521955	76613555	91602	Gain	0.00291528	0.998
chr13	84250610	84350203	99595	Gain	0.0150632	0.998
chr13	73308901	73402821	93922	Gain	0.00262229	0.998
chr13	70927978	71022781	94805	Gain	0.00450734	0.998
chr11	10157857	10403538	245683	Loss	0.0295474	0.998
chr13	85554591	85664467	109878	Gain	0.0150632	0.998
chr19	31290599	31390463	99866	Gain	0.0155531	0.998
chr13	68462331	68578907	116578	Gain	0.00451093	0.998
chr3	157960300	158076068	115770	Gain	0.0013101	0.998
chr9	73545157	73638538	93383	Gain	0.0295474	0.998
chr2	101244759	101342685	97928	Gain	0.049089	0.998
chr9	90773397	90896429	123034	Gain	0.018092	0.998
chr20	17617531	17714318	96789	Gain	0.0294144	0.998
chr1	219631863	219741839	109978	Gain	0.00744067	0.998
chr2	106481446	106587547	106103	Gain	0.0496022	0.998
chr17	25653086	25744158	91074	Gain	0.0458959	0.998
chr1	245549962	245675778	125818	Gain	0.00744067	0.998
chr13	60227365	60335145	107782	Gain	0.00450528	0.998
chr11	47141931	47394304	252375	Loss	0.0074303	0.998
chr17	37663986	37789431	125447	Gain	0.0279113	0.998
chr17	79155017	79247798	92783	Gain	0.0458959	0.998
chr13	87929502	88031620	102120	Gain	0.0150632	0.998
chr13	60450643	60569375	118734	Gain	0.00450528	0.998
chr2	153251477	153347813	96338	Gain	0.0155531	0.998
chr7	2929427	3031018	101593	Gain	0.0218635	0.998
chr13	57447371	57562127	114758	Gain	0.00291634	0.998
chr17	37813856	37923373	109519	Gain	0.0458959	0.998
chr13	59046767	59134824	88059	Gain	0.00291634	0.998
chr13	65300454	65395606	95154	Gain	0.00450528	0.998
chr3	150388599	150496091	107494	Gain	0.0013101	0.998
chr13	75983762	76071026	87266	Gain	0.00291528	0.998
chr20	49712590	49841432	128844	Gain	0.000145464	0.998
chr13	83775146	83866823	91679	Gain	0.0150632	0.998
chr2	153353157	153439418	86263	Gain	0.0155531	0.998
chr20	21700645	21785055	84412	Gain	0.032006	0.998
chr18	32599572	32853049	253479	Loss	0.0069134	0.998
chr21	34792665	34889868	97205	Gain	0.00705576	0.998
chr7	7353762	7455911	102151	Gain	0.0218635	0.998
chr3	166391465	166503120	111657	Gain	0.0023226	0.998
chr3	165960319	166073920	113603	Gain	0.0023226	0.998
chr9	82802244	82920277	118035	Gain	0.0295474	0.998
chr11	9917162	10157856	240696	Loss	0.047587	0.998
chr7	7970015	8059233	89220	Gain	0.0218635	0.998
chr9	82700796	82794781	93987	Gain	0.0295474	0.998
chr9	90171521	90276908	105389	Gain	0.018092	0.998
chr20	19396628	19525982	129356	Gain	0.00466748	0.998
chr2	100220418	100307684	87268	Gain	0.0314804	0.998
chr9	126944378	127050543	106167	Gain	0.00710295	0.998
chr3	168826359	168950858	124501	Gain	0.0023226	0.998
chr3	136652939	136740993	88056	Gain	0.0023226	0.998
chr13	91099465	91195864	96401	Gain	0.00688413	0.998
chr11	9044971	9280462	235493	Loss	0.047587	0.998
chr5	130133843	130224743	90902	Gain	0.0230953	0.998
chr1	214514361	214635596	121237	Gain	0.00468996	0.998
chr5	130224744	130335160	110418	Gain	0.0230953	0.998
chr2	100307875	100401000	93127	Gain	0.0314804	0.998
chr18	76170411	76420907	250498	Loss	0.000109635	0.998
chr19	43059964	43148255	88293	Gain	0.047587	0.998
chr2	158823388	158940264	116878	Gain	0.0155531	0.998
chr13	58276835	58405723	128890	Gain	0.00451093	0.998
chr3	144186116	144277401	91287	Gain	0.0013101	0.998
chr2	148536947	148631534	94589	Gain	0.0155531	0.998
chr2	147163193	147262072	98881	Gain	0.049089	0.998
chr7	28190121	28301101	110982	Gain	0.0218635	0.998
chr9	125552282	125673676	121396	Gain	0.00710295	0.998
chr13	56158438	56264968	106532	Gain	0.00451093	0.998
chr18	10660859	10901807	240950	Loss	0.00233746	0.998
chr13	86998286	87126917	128633	Gain	0.0150632	0.998
chr3	145449826	145553174	103350	Gain	0.0013101	0.998
chr13	86665093	86758587	93496	Gain	0.0150632	0.998
chr13	57562128	57660393	98267	Gain	0.00451093	0.998
chr20	19308322	19396310	87990	Gain	0.00308321	0.998
chr13	53969680	54071056	101378	Gain	0.00451093	0.998
chr5	177415208	177649986	234780	Loss	0.0318259	0.998
chr20	60980408	61065194	84788	Gain	9.78e-05	0.998
chr9	126664663	126756640	91979	Gain	0.00710295	0.998
chr16	11757092	11984179	227089	Loss	0.0230953	0.998
chr16	13959102	14212714	253614	Loss	0.0230953	0.998
chr2	150699859	150793155	93298	Gain	0.0155531	0.998
chr3	127028930	127149771	120843	Gain	0.00710295	0.998
chr11	1681293	1928614	247323	Loss	0.0295474	0.998
chr9	127119172	127245411	126241	Gain	0.00710295	0.998
chr18	53567820	53813380	245562	Loss	0.000328366	0.998
chr1	174805039	174911406	106369	Gain	0.0207575	0.998
chr9	119246425	119369191	122768	Gain	0.0109391	0.998
chr9	34272090	34382817	110729	Gain	0.038105	0.998
chr21	34971457	35072689	101234	Gain	0.0415716	0.998
chr20	52127043	52230909	103868	Gain	0.000509244	0.998
chr20	17505952	17600022	94072	Gain	0.0415378	0.998
chr20	38344300	38438771	94473	Gain	0.000586425	0.998
chr20	59351872	59437810	85940	Gain	0.000673974	0.998
chr18	71610943	71840303	229362	Loss	0.000555643	0.998
chr9	98900154	99002854	102702	Gain	0.0109391	0.998
chr20	59441596	59559889	118295	Gain	0.000673974	0.998
chr5	179006305	179110850	104547	Gain	0.0415716	0.998
chr5	135128036	135244495	116461	Gain	0.0413305	0.998
chr9	3631104	3727379	96277	Gain	0.038105	0.998
chr13	39343925	39427656	83733	Gain	0.0216153	0.998
chr5	127422925	127509009	86086	Gain	0.0413305	0.998
chr20	13306325	13416915	110592	Gain	0.0184492	0.998
chr2	214887023	215001225	114204	Gain	0.0198618	0.998
chr20	5058791	5153868	95079	Gain	0.0184492	0.998
chr1	195548141	195642916	94777	Gain	0.011649	0.998
chr17	58738718	58838995	100279	Gain	0.0194264	0.998
chr3	175760560	175873812	113254	Gain	0.000406968	0.998
chr9	24105630	24190038	84410	Gain	0.038105	0.998
chr9	25916354	26017340	100988	Gain	0.038105	0.998
chr13	26757054	26859546	102494	Gain	0.0102162	0.998
chr20	40566626	40662596	95972	Gain	0.000586425	0.998
chr5	148903068	148997955	94889	Gain	0.0413305	0.998
chr5	128630593	128881009	250418	Loss	0.0404556	0.998
chr17	27976736	28085485	108751	Gain	0.0124867	0.998
chr21	32698397	32796332	97937	Gain	0.0413305	0.998
chr20	54781817	54873707	91892	Gain	0.000509244	0.998
chr14	24246353	24494243	247892	Loss	0.0430087	0.998
chr13	30107963	30212939	104978	Gain	0.0102162	0.998
chr1	182694499	182813633	119136	Gain	0.011649	0.998
chr3	188164033	188291778	127747	Gain	0.000732976	0.998
chr18	60340754	60582902	242150	Loss	0.000555643	0.998
chr3	65133041	65226989	93950	Gain	0.0415716	0.998
chr20	25837526	25929244	91720	Gain	0.0139459	0.998
chr11	106270965	106506598	235635	Loss	0.000708023	0.998
chr1	180803547	180895239	91694	Gain	0.0207575	0.998
chr18	65539128	65791455	252329	Loss	0.00109434	0.998
chr3	76498608	76607579	108973	Gain	0.0415716	0.998
chr13	25542272	25666239	123969	Gain	0.0428052	0.998
chr2	206206244	206307912	101670	Gain	0.038105	0.998
chr20	57047666	57131000	83336	Gain	0.000346926	0.998
chr9	25522071	25631570	109501	Gain	0.038105	0.998
chr13	113268018	113371938	103922	Gain	0.0428052	0.998
chr13	92753853	92870983	117132	Gain	0.0102944	0.998
chr5	148386222	148516012	129792	Gain	0.0413305	0.998
chr5	148287178	148386221	99045	Gain	0.0413305	0.998
chr3	188387013	188483275	96264	Gain	0.000732976	0.998
chr9	26915926	27009100	93176	Gain	0.038105	0.998
chr1	180896903	181012971	116070	Gain	0.0207575	0.998
chr9	97415910	97536765	120857	Gain	0.0109391	0.998
chr3	65580759	65692006	111249	Gain	0.0415716	0.998
chr18	60112246	60340753	228509	Loss	0.000555643	0.998
chr5	145067015	145156938	89925	Gain	0.0413305	0.998
chr20	55362831	55453180	90351	Gain	0.000509244	0.998
chr2	207603536	207696261	92727	Gain	0.038105	0.998
chr13	98177829	98271385	93558	Gain	0.0428835	0.998
chr20	59561251	59680542	119293	Gain	0.000673974	0.998
chr2	224070609	224169311	98704	Gain	0.0198618	0.998
chr17	34045987	34167197	121212	Gain	0.0124867	0.998
chr13	102040364	102157476	117114	Gain	0.0430045	0.998
chr3	73608776	73712338	103564	Gain	0.0415716	0.998
chr17	37436966	37540203	103239	Gain	0.0412326	0.998
chr21	34331883	34437507	105626	Gain	0.0413305	0.998
chr7	14125004	14223471	98469	Gain	0.0102944	0.998
chr3	77691253	77811910	120659	Gain	0.0415716	0.998
chr14	24612185	24864229	252046	Loss	0.0430087	0.998
chr20	25608304	25693559	85257	Gain	0.0102245	0.998
chr18	57908134	58160899	252767	Loss	0.000555643	0.998
chr9	29019023	29123048	104027	Gain	0.038105	0.998
chr20	56016512	56112197	95687	Gain	0.000586425	0.998
chr13	101884564	101994998	110436	Gain	0.0430045	0.998
chr1	118284902	118411515	126615	Gain	0.0413305	0.998
chr5	127517603	127627829	110228	Gain	0.0413305	0.998
chr2	209495858	209605762	109906	Gain	0.038105	0.998
chr2	219397815	219513282	115469	Gain	0.0198618	0.998
chr2	204494698	204590070	95374	Gain	0.0198618	0.998
chr9	95935293	96063689	128398	Gain	0.0109391	0.998
chr3	190461989	190587680	125693	Gain	0.000732976	0.998
chr20	53787050	53873418	86370	Gain	0.000509244	0.998
chr9	97544820	97648587	103769	Gain	0.0109391	0.998
chr21	35985896	36079492	93598	Gain	0.0413305	0.998
chr20	53657564	53757761	100199	Gain	0.000509244	0.998
chr9	29664382	29770176	105796	Gain	0.038105	0.998
chr3	189896768	190019550	122784	Gain	0.000732976	0.998
chr20	34700782	34827815	127035	Gain	0.000586425	0.998
chr18	53820250	54049508	229260	Loss	0.000328366	0.998
chr20	5252794	5353419	100627	Gain	0.0184492	0.998
chr3	64554657	64637823	83168	Gain	0.0415716	0.998
chr3	194094111	194177322	83213	Gain	0.000732976	0.998
chr2	213876288	213978526	102240	Gain	0.0198618	0.998
chr20	25355954	25447474	91522	Gain	0.0102129	0.998
chr11	45280203	45521992	241791	Loss	0.0208064	0.998
chr5	130335161	130429576	94417	Gain	0.0413305	0.998
chr5	149834718	149932178	97462	Gain	0.0413305	0.998
chr20	48145529	48239643	94116	Gain	0.000297863	0.998
chr17	58604461	58698741	94282	Gain	0.0194264	0.998
chr18	1280217	1511466	231251	Loss	0.0130424	0.998
chr2	186947476	187040402	92928	Gain	0.0123434	0.998
chr3	190587681	190702923	115244	Gain	0.000732976	0.998
chr3	192481425	192571028	89605	Gain	0.000732976	0.998
chr20	56624067	56733027	108962	Gain	0.000346926	0.998
chr2	214222992	214350989	127999	Gain	0.0198618	0.998
chr17	21176222	21276726	100506	Gain	0.0407945	0.998
chr20	39999174	40095638	96466	Gain	0.000586425	0.998
chr17	28085486	28185149	99665	Gain	0.0124867	0.998
chr3	188539317	188644676	105361	Gain	0.000732976	0.998
chr3	175873813	175969119	95308	Gain	0.000732976	0.998
chr20	59076154	59194462	118310	Gain	0.000673974	0.998
chr9	27226419	27310415	83998	Gain	0.038105	0.998
chr20	17310498	17414361	103865	Gain	0.014228	0.998
chr1	207748868	207854483	105617	Gain	0.011649	0.998
chr20	59235960	59336261	100303	Gain	0.000673974	0.998
chr2	202423705	202509110	85407	Gain	0.0198618	0.998
chr5	135030152	135113671	83521	Gain	0.0413305	0.998
chr2	181230513	181349557	119046	Gain	0.0123434	0.998
chr7	14016939	14124064	107127	Gain	0.0102944	0.998
chr20	39536139	39625458	89321	Gain	0.000586425	0.998
chr20	37889503	38012110	122609	Gain	0.000346926	0.998
[truncated: 7,784 more rows]
