# Supplementary material for: Integrative multi-omics analysis identified FUT9 and MS4A3 as novel immune-phenotype and prognosis biomarkers for colorectal cancer and analyze the role of FUT9 in oncoimmunology
Source: Research Square preprint supplement (doi:10.21203/rs.3.rs-8306096/v1), 2025-12-09
Supplement: Supplementary file 3 [file df0fd93f102c32d1f558fa11.xlsx]

## Sheet: SNP6_nocnv_genomicSegment_Clust
11	50055331	56013797	Loss	0.0074303	RP11-227P3.1,RP11-347H15.6,RP11-347H15.2,RP11-347H15.3,RP11-347H15.4,AC110283.1,OR4A6P,OR4A5,OR4A7P,OR4A8P,OR4A2P,OR4A3P,OR4A4P,OR4C7P,OR4C46,RP11-72M10.2,RP11-72M10.8,TRIM51HP,RP11-72M10.5,OR4A11P,OR4A12P,OR4A16,OR4A15,OR4A9P,OR4X7P,RP11-131J4.12,OR4A10P,OR4A17P,OR4A13P,OR4A50P,OR4A14P,OR4A21P,OR4C1P,OR4C14P,OR4C15,OR4C16,OR4C11,OR4P4,OR4S2,OR4C6,OR4V1P,OR4P1P,RP11-674C21.9,OR5D2P,OR5D3P,OR5D17P…
2	89130754	95341699	Gain	0.0496022	IGKC,IGKJ5,IGKJ4,IGKJ3,IGKJ2,IGKJ1,IGKV4-1,IGKV5-2,IGKV7-3,PGBD4P5,IGKV2-4,IGKV1-5,IGKV1-6,IGKV3-7,IGKV1-8,IGKV1-9,IGKV2-10,IGKV3-11,IGKV1-12,IGKV1-13,IGKV2-14,IGKV3-15,IGKV1-16,IGKV1-17,IGKV2-18,IGKV2-19,IGKV3-20,IGKV6-21,IGKV1-22,IGKV2-23,IGKV2-24,IGKV3-25,IGKV2-26,IGKV1-27,IGKV2-28,IGKV2-29,IGKV2-30,IGKV3-31,IGKV1-32,IGKV1-33,IGKV3-34,IGKV1-35,IGKV2-36,IGKV1-37,IGKV2-38,IGKV1-39,IGKV2-40,IGKV2…
16	14747103	18808402	Loss	0.0413305	RP11-719K4.3,RP11-719K4.6,ABCC6P2,RP11-719K4.7,MIR3179-1,MIR3670-1,MIR3180-1,hsa-mir-3180-3,Y_RNA,RP11-680G24.4,MIR1972-1,RP11-680G24.5,RP11-72I8.1,Y_RNA,hsa-mir-3180-4,MIR3180-4,AC126763.1,CTB-193M12.1,MIR484,AF001548.5,AF001548.6,RNU6-213P,CTA-972D3.2,RPL15P20,RPL17P40,RP11-517A5.7,RP11-517A5.6,RP11-517A5.4,MIR3179-2,MIR3670-2,MIR3180-2,hsa-mir-3180-3,Y_RNA,RP11-467M13.2,RP11-467M13.3,RN7SL90P,…
18	14660483	18689746	Loss	0.0289409	RNU6-1210P,AP006564.1,RP11-1157N2__B.2,MIR3156-2,RP11-527H14.6,FGF7P1,RP11-527H14.3,RP11-527H14.1,RP11-805F19.4,RN7SL662P,RP11-805F19.1,RP11-454P7.3,BNIP3P3,RNU6-721P,AC036178.1,RP11-527H14.4,RP11-527H14.2,RP11-805F19.2,RP11-454P7.1,AP005901.1,ANKRD30B,ROCK1
20	26197900	29843972	Gain	0.00403922	RP4-610C12.2,RP4-610C12.4,RP4-610C12.3,Y_RNA,AL441988.1,MLLT10P1,RP4-610C12.1,FRG1B,MIR663A
7	18224545	21523664	Gain	0.0151315	AC091697.1,AC010082.2,RN7SKP266,AC004744.3,AC003986.7,FERD3L,MIR3146,AC004543.1,RPL21P75,AC005083.1,CTA-293F17.1,SNORD56,EEF1A1P27,AC002486.2,AC002486.3,RPL23P8,RPS26P30,RN7SL542P,ASS1P11,RNU1-15P,AC005094.2,AC004595.1,MIR1183,NPM1P13,AC003986.6,AC003986.5,TWISTNB,AC004543.2,RP11-486P11.1,AC099342.1,SP8,TWIST1,AC007091.1,TMEM196,AC005062.2,MACC1,MACC1-AS1,ITGB8,ABCB5,SP4,HDAC9,LINC01162
18	69049159	71367031	Loss	0.00109434	RP11-752P2.1,RP11-752P2.2,RP11-736G13.2,HNRNPA1P11,RP11-713C5.1,RNA5SP460,MIR548AV,RP11-676J15.1,RP11-723G8.2,RP11-723G8.1,CTD-2354A18.1,RP11-736G13.1,NETO1,RP11-169F17.1,RP11-510D19.1,CBLN2
3	90485963	93734670	Gain	0.0234456	RNU6-488P,Y_RNA,RNU6-511P,HMGN1P7,STX19,PROS1,ARL13B
3	117803575	120516491	Gain	0.0208064	IGSF11-AS1,RPS26P21,ARHGAP31-AS1,RNU6-1127P,RP11-190C22.8,RP11-190C22.9,RP11-190C22.1,RP11-169N13.4,PHBP8,RP11-767L7.1,RP11-767L7.2,RN7SL762P,RN7SL397P,Y_RNA,RP11-174O3.1,RP11-174O3.4,RP11-359H3.4,RP11-359H3.1,AC126182.1,NDUFB4,RP11-567P17.1,RP11-567P17.2,C3orf30,UPK1B,B4GALT4,B4GALT4-AS1,TMEM39A,POGLUT1,TIMMDC1,ADPRH,PLA1A,POPDC2,COX17,MAATS1,NR1I2,RP11-18H7.1,RP11-174O3.3,FSTL1,HGD,GTF2E1,RP11-…
2	124187767	126480332	Gain	0.0496022	AC073409.1,AC092646.3,AC092646.1,AC092646.2,RN7SKP102,MTND5P22,RP11-56O18.1,RNA5SP102,RNU6-259P,snosnR60_Z15,CNTNAP5,AC097499.1,AC079154.1
3	138797737	141022486	Gain	0.0013101	RPL7L1P7,RP11-219D15.3,RNU6-736P,RP11-319G6.3,ACTG1P1,AC097103.1,RP11-553K23.2,RN7SKP124,RN7SL724P,RP11-442N1.2,RP11-442N1.1,TRMT112P5,AC092988.1,RP11-68L1.2,AC048346.1,CLSTN2-AS1,RP11-13L2.1,RP11-691G17.1,RP11-4H14.1,RP11-231L11.3,RP11-764I5.1,BPESC1,COPB2,RBP1,RP11-166D18.1,RP11-68L1.1,TRIM42,SLC25A36,RP11-231L11.1,ACPL2,MRPS22,RP11-319G6.1,RBP2,NMNAT3,CLSTN2,SPSB4,RP11-438D8.2
9	75827662	78027654	Gain	0.0295474	AL449083.1,RP11-404E6.1,RP11-128I7.1,RP11-549A6.1,RNA5SP286,RP11-401G5.1,RN7SKP47,RP11-174B4.2,RNY4P1,RNU6-445P,RP11-197P3.1,Y_RNA,RNU6-1228P,RP11-323A7.1,RP11-171A24.2,RP11-171A24.3,C9orf40,C9orf41,RP11-197P3.5,NMRK1,RORB,TRPM6,OSTF1,RP11-197P3.4
1	197388241	199582236	Gain	0.011649	Y_RNA,EEF1A1P32,RP11-448G4.2,FAM204BP,RP11-448G4.4,C1orf53,RP11-401A10.2,RP11-553K8.2,RP11-553K8.5,PEBP1P3,MIR181B1,MIR181A1,RP11-16L9.1,RP11-16L9.2,AC105941.1,RP11-104D3.1,RP11-104D3.2,RP11-75C23.1,LHX9,ATP6V1G3,RP11-16L9.3,RP11-16L9.4,CRB1,DENND1B,PTPRC,MIR181A1HG,NEK7,RP11-382E9.1
11	101424671	103318440	Loss	0.00127277	RP11-748H22.1,RP11-748H22.2,snoU13,snoU13,RP11-732A21.2,RP11-864G5.3,RP11-864G5.1,RP11-864G5.7,RP11-864G5.8,RNU6-952P,RP11-315O6.1,RP11-817J15.3,AP000619.5,AP000647.3,RP11-725K16.2,RNU7-159P,RP11-690D19.1,RP11-37O16.7,RP11-37O16.6,RP11-37O16.4,RP11-37O16.3,MTND2P26,MTND1P36,RP11-37O16.8,ANGPTL5,C11orf70,YAP1,BIRC3,TMEM123,MMP7,MMP20,MMP27,MMP8,MMP10,MMP1,AP000619.6,MMP3,MMP12,MMP13,RP11-690D19.3,…
2	174182310	176289435	Gain	0.0246357	AC073465.1,AC073465.2,AC073465.3,AC013410.2,RP11-796E10.1,RPL5P7,RP11-394I13.3,RP11-394I13.1,AC016737.1,RP11-451F14.1,RN7SL65P,Y_RNA,AC013467.1,HNRNPA1P39,SP9,AC018470.1,AC010894.3,AC010894.4,RNU6-5P,AC010894.5,H3F3AP4,AC018890.4,Y_RNA,RNU6-763P,RNU6-1290P,AC007435.1,MIR933,AC096649.2,Y_RNA,AC096649.1,AC096649.4,AC092573.2,CDCA7,AC013410.1,AC106900.6,SP3,RP11-394I13.2,AC018470.4,SCRN3,GPR155,CHRN…
3	145557031	147576012	Gain	0.0013101	RP11-88H10.3,RP11-274H2.5,AC107021.1,RNU6-428P,PLSCR5-AS1,RP11-232M24.1,U3,RNU6-505P,RPL21P71,ZIC4-AS1,NPM1P28,RP11-78O22.1,RP11-88H10.2,RP11-274H2.2,RP11-274H2.3,PLOD2,PLSCR4,RP11-758I14.2,RP11-758I14.3,PLSCR1,PLSCR5,ZIC4,PLSCR2,ZIC1,RP11-649A16.1
2	194668866	196646787	Gain	0.0246357	RP11-764E7.1,AC068135.1,GLULP6,HNRNPA1P47,AC106883.1,AC073973.1,SNORD59,RNU6-169P,AC064834.2,AC064834.3,AHCYP5,RNU6-915P,AC018799.1,AC006196.1,AC010983.1,AC064834.1,RP11-762E8.1,SLC39A10,DNAH7
1	151062312	153031565	Gain	0.0458959	RP11-68I18.2,RP11-68I18.10,TNFAIP8L2,LYSMD1,TMOD4,PSMD4,RP11-126K1.2,RN7SL444P,RP11-126K1.9,RFX5,RP11-126K1.8,RP11-126K1.6,PSMB4,RNY4P25,SNORA44,MIR554,RP11-74C1.2,RNU6-1062P,RP11-98D18.1,RNU6-662P,RP11-98D18.7,OAZ3,RP11-98D18.3,RP11-98D18.2,RP11-98D18.16,RP11-98D18.17,LINGO4,C2CD4D,Y_RNA,AL450992.2,THEM5,KRT8P28,SPTLC1P4,TCHH,AL589986.2,HDHD1P2,RPTN,RP11-107M16.2,HMGN3P1,CRNN,LCE5A,CRCT1,LCE3E,L…
1	193482495	195387587	Gain	0.011649	RP11-98G13.1,U3,RPL23AP22,EEF1A1P14,RP11-476H20.1,RNU6-983P,RP11-489C13.1,AL357932.1,RP11-21J7.1,RP11-563D10.1
2	83424149	85332418	Gain	0.049089	AC138623.1,AC010744.1,RPL37P10,RNU6-1312P,SNORD112,AC104395.2,AC104395.1,AC016908.1,ST6GALNAC2P1,FUNDC2P2,AC106874.3,DUXAP1,LDHAP7,RPL12P18,AC022210.1,TMSB10,AC022210.2,RP11-60H5.1,AC078974.2,LSM3P3,AC106874.1,KCMF1,SUCLG1,TRABD2A,DNAH6
3	160965864	162764071	Gain	0.0013101	EEF1GP4,PSMC1P7,RP11-3P17.5,RP11-3P17.3,RP11-774I5.1,TOMM22P6,RP13-526J3.1,RP11-3P17.4,NMD3,SPTSSB,OTOL1,RP11-10O22.1
2	108540267	110368569	Gain	0.0496022	AC023672.2,AC023672.1,RP11-443K8.2,AC019100.7,RP11-443K8.1,RP11-465O11.2,RP11-465O11.1,AC010095.5,AC010095.6,AC010095.7,AC073415.2,SH3RF3-AS1,MIR4265,SNRPGP9,MIR4266,RP11-537E18.1,SLC5A7,SULT1C3,SULT1C2P1,SULT1C4,GCC2,AC012487.2,RANBP2,AC019100.3,SULT1C2,LIMS1,CCDC138,EDAR,10-Sep,AC011753.5,SH3RF3
11	34970172	36633856	Loss	0.0208064	AL356215.1,RP4-607I7.1,RP1-68D18.4,RP1-68D18.2,AC090625.1,RP4-683L5.1,FJX1,RP1-276E15.1,RP11-698N11.4,KRT18P14,AC090692.1,RP11-698N11.2,RP5-916O11.3,RP5-916O11.1,MIR3973,LINC00610,RP11-514F3.4,RP11-514F3.5,RP11-219O3.2,CD44,RP1-68D18.3,RP5-945I17.2,RP5-916O11.2,TRAF6,RAG2,C11orf74,PDHX,SLC1A2,PAMR1,TRIM44,LDLRAD3,COMMD9,PRR5L,RAG1
1	184131754	185900496	Gain	0.0207575	Y_RNA,Y_RNA,RP11-382D12.1,RN7SL654P,RP11-382D12.2,GS1-115G20.1,GS1-115G20.2,SNORD112,RNU7-13P,RNA5SP72,CTA-253N17.1,RPL5P5,Y_RNA,Y_RNA,RP4-635A23.3,Y_RNA,RP4-635A23.4,GS1-279B7.2,RNU7-183P,CTA-277P6.1,Y_RNA,Y_RNA,GS1-204I12.4,GS1-120K12.4,RNF2,FTH1P25,TRMT1L,IVNS1ABP,GS1-279B7.1,GS1-204I12.1,EDEM3,FAM129A,SWT1,HMCN1,C1orf21
22	22190283	23816387	Loss	0.0480913	KB-1027C11.4,LL22NC03-86G7.1,IGLV4-69,IGLVI-68,LL22NC03-23C6.13,LL22NC03-23C6.12,IGLV10-67,LL22NC03-23C6.15,IGLVIV-66-1,IGLVV-66,IGLVIV-65,IGLVIV-64,IGLVI-63,IGLV1-62,IGLV8-61,LL22NC03-88E1.17,ABHD17AP5,LL22NC03-30E12.10,LL22NC03-30E12.11,IGLV4-60,LL22NC03-30E12.13,SOCS2P2,IGLVIV-59,IGLVV-58,BMP6P1,IGLV6-57,IGLVI-56,IGLV11-55,IGLV10-54,IGLVIV-53,TOP3BP1,LL22NC03-123E1.5,VPREB1,LL22NC03-2H8.5,LL22…
2	114525984	116262042	Gain	0.0496022	AC024704.2,snoU13,RP11-141B14.1,AC110769.3,AC110769.1,U3,AC010982.2,SEPHS1P7,snoU13,RNU2-41P,DPP10-AS2,RPSAP23,AC104653.1,AC010982.1,DPP10-AS3,DPP10-AS1,ACTR3,DPP10
2	210033551	211711551	Gain	0.0198618	MEAF6P1,PKP4P1,RNA5SP118,SNAI1P1,RP11-260M2.1,AC006994.1,AC006994.3,Y_RNA,RPE,AC007038.7,AC006994.2,ACADL,LANCL1,MAP2,KANSL1L,MYL1,AC007970.1,CPS1,UNC80
3	181455520	183125664	Gain	0.000732976	RN7SL703P,RNA5SP150,RP11-252O18.2,RP11-252O18.3,RN7SKP265,RP11-338L18.1,RP11-139K4.4,RPL7L1P8,RP11-646E18.3,RP11-646E18.4,RP11-225N10.3,RP11-531F16.4,RP11-531F16.3,MCCC1-AS1,RNA5SP151,RP11-416O18.1,RP11-416O18.2,RP11-139K4.2,RP11-646E18.2,RP11-225N10.1,DCUN1D1,MCCC1,RP11-139K4.1,ATP11B,LAMP3,MCF2L2,B3GNT5,SOX2-OT
10	105229748	106719838	Loss	0.0458959	RP11-416N2.3,RP11-416N2.4,Y_RNA,RP11-541N10.3,RN7SL524P,SFR1,MIR609,MIR4482-1,RP11-127L20.5,CCDC147-AS1,snoU13,RP11-127O4.3,RP11-127O4.2,SORCS3-AS1,CALHM3,NEURL1,COL17A1,MIR936,GSTO1,ITPRIP,RP11-127L20.3,RP11-225H22.5,SH3PXD2A,OBFC1,SLK,GSTO2,CCDC147,WDR96,SORCS3
9	121839797	123477728	Gain	0.0109391	RP11-360A18.1,MIR147A,RP11-295D22.1,RP11-360A18.2,BRINP1,CDK5RAP2,MEGF9
1	169787276	171411047	Gain	0.0207575	RN7SL333P,RN7SL269P,MRPS10P1,AL356475.1,RP11-332H17.1,SIGLEC30P,MIR3119-1,ISCUP1,HAUS4P1,AL354732.1,RP11-545I10.2,RP1-79C4.4,BX284613.1,RP5-1092L12.2,MIR1295A,RP1-45C12.1,Y_RNA,HMGB1P11,RP4-798A17.5,TOP1P1,GM2AP2,RNU6-290P,SCYL3,RP11-297H3.3,LINC01142,RP11-576I22.2,GORAB,RP1-79C4.1,FMO3,FMO6P,FMO1,C1orf112,KIFAP3,METTL11B,PRRX1,FMO2,RP1-127D3.4,FMO4,MROH9
1	172508727	174054077	Gain	0.0207575	RNU6-693P,FASLG,SLC25A38P1,AIMP1P2,RP3-471M13.2,GOT2P2,RP3-395P12.2,snoU13,RP11-296O14.1,RP11-296O14.2,RP11-360D2.1,snoU13,RP11-360D2.2,RN7SKP160,Y_RNA,GAS5-AS1,SNORD78,RNA5SP67,RNA5SP68,RP11-160H22.3,SUCO,TNFSF4,PRDX6,ANKRD45,KLHL20,CENPL,GAS5,ZBTB37,SERPINC1,RC3H1-IT1,RP11-296O14.3,SLC9C2,RP3-436N22.3,DARS2,RC3H1,RP1-15D23.2,TNFSF18
3	184475834	185988486	Gain	0.000732976	EIF2S2P2,MIR5588,RPL4P4,snoU13,RP11-537I16.2,MIR548AQ,RN7SL637P,ETV5-AS1,RP11-329B9.1,EHHADH-AS1,LIPH,C3orf65,TRA2B,RP11-443P15.2,ETV5,C3orf70,EHHADH,MAP3K13,TMEM41A,SENP2,IGF2BP2,DGKG,VPS8
11	118999705	120405436	Loss	0.000708023	AP002956.1,PDZD3,RNU6-262P,MCAM,ACA64,RNF26,RP11-334E6.10,RP11-334E6.3,RP11-334E6.2,RP11-334E6.4,RP11-334E6.12,DUXAP5,KRT8P7,RNU6-1123P,CTD-2523D13.1,RP11-215D10.1,AP000679.2,TMEM136,AP000758.1,AP002348.1,HINFP,ABCG4,NLRX1,CCDC153,C1QTNF5,MFRP,MFRP,USP2,THY1,RP11-196E1.3,CTD-2523D13.2,RP11-831A10.2,RP11-831A10.1,TRIM29,OAF,POU2F3,RP11-778O17.4,CBL,USP2-AS1,ARHGEF12,PVRL1,GRIK4
7	16735586	18219540	Gain	0.0151315	AC073333.1,RP11-455J15.1,RAD17P1,AC098592.6,AC098592.7,AC098592.8,SNORA63,AC006482.1,RNMTL1P2,AC080080.1,PRPS1L1,MIR1302-6,BZW2,AC073333.8,TSPAN13,AGR2,AC003075.4,AHR,AC019117.2,AGR3,AC019117.1,AC017060.1,SNX13,HDAC9
2	176289436	177760683	Gain	0.0246357	EXTL2P1,AC016751.2,HOXD13,HOXD12,HOXD11,AC009336.1,HOXD9,MIR10B,HOXD4,AC009336.24,HOXD1,AC016739.2,AC016739.1,AC073069.2,AC068706.2,AC068706.1,AC017048.1,AC017048.2,RP11-324L17.1,LINC01116,RNU6ATAC14P,FUCA1P1,AC092162.2,AC073636.1,AC016751.3,HOXD10,HOXD-AS2,HOXD8,HOXD3,RP11-387A1.5,HOXD-AS1,MTX2,LINC01117,KIAA1715,EVX2,AC092162.1,AC096649.3
3	132566768	134027606	Gain	0.0023226	RP11-79L21.1,RP11-503I22.2,RP11-91K8.4,RP11-91K8.5,RP11-91K8.2,SNORA33,RNU6-678P,RNA5SP140,C3orf36,HMGB3P14,RP11-469L4.1,RP11-402L6.1,TOPBP1,TF,RP11-404G16.2,SRPRB,RP11-202A13.1,NPHP3-AS1,TMEM108,CDV3,TFP1,RAB6B,SLCO2A1,RYK,BFSP2,BFSP2-AS1
11	109279968	110657110	Loss	0.000708023	RP11-10A7.1,RP11-386B1.1,TFAMP2,RP11-361A21.1,RP11-361A21.3,C11orf87,RP11-262A12.1,RP11-344L21.1,FDX1,RP11-708B6.2,ZC3H12C,RP11-347E10.1,ARHGAP20,RDX
11	93683256	95038256	Loss	0.00127277	HPRTP4,HPRTP3,RP11-715G18.3,RP11-680H20.1,FOLR4,AP000765.1,MIR548L,RP11-685N10.1,ANKRD49,FUT4,RP11-867G2.6,ST13P11,RP11-60C6.3,KDM4E,RP11-60C6.5,RP11-60C6.6,RP11-735A19.2,SRSF8,SRSF8,RP11-712B9.4,RP11-712B9.5,HEPHL1,PANX1,GPR83,MRE11A,LINC01171,PIWIL4,CWC15,KDM4D,ENDOD1,SESN3,RP11-680H20.2,AMOTL1,RP11-856F16.2,RP11-712B9.2,RP11-867G2.8,RP11-867G2.5
3	179776202	181227786	Gain	0.000732976	RNA5SP149,RP11-420J11.1,RP11-420J11.2,U8,RNU6-486P,RP11-496B10.1,RN7SL229P,RP11-259P15.4,RP11-259P15.3,FLYWCH1P1,RP11-259P15.1,DNAJC19,RP11-262M14.2,RNU6-4P,FAUP2,GAPDHP36,RP11-496B10.3,TTC14,CCDC39-AS1,RPL7AP25,FXR1,RP11-275H4.1,CCDC39,SOX2-OT
1	218142819	219591132	Gain	0.00744067	RP11-152L7.1,RNU1-141P,RP11-224O19.4,RP11-224O19.5,RP11-224O19.2,U3,RP11-412H9.1,RIMKLBP2,RP11-392O17.1,RP11-152L7.2,TGFB2,C1orf143,RP11-412H9.2,LYPLAL1,RP11-135J2.3,RRP15,RP11-135J2.4
2	87055250	88493100	Gain	0.049089	AC111200.1,AC111200.2,AC111200.7,AC111200.8,RP11-1252D15.1,AC092651.1,MIR4771-1,AC083899.1,RP11-223J6.1,IGKV3OR2-268,AC068279.2,AC068279.1,AC068279.3,RP11-1399P15.1,AC133644.3,MIR4435-1,AC133965.1,MTATP8P2,AC108479.1,AC108479.2,snoU13,RNU2-63P,MIR4780,CD8B,ANAPC1P1,PLGLB1,AC083899.3,AC093616.4,PLGLB2,SMYD1,FABP1,RGPD1,AC125232.1,LINC00152,KRCC1,THNSL2,RGPD2
3	158127370	159554844	Gain	0.0013101	RP11-538P18.1,MTAPP1,RP11-79M21.3,RP11-379F4.7,RP11-379F4.6,RP11-379F4.1,RP11-379F4.8,RP11-379F4.9,GPR79,MIR3919,RP11-564C24.1,IQCJ-SCHIP1-AS1,RNU2-31P,AC021654.1,RP11-538P18.2,MLF1,GFM1,LXN,RARRES1,RP11-441M10.1,RSRC1,MFSD1,RP11-379F4.4,IQCJ,IQCJ-SCHIP1
1	189960864	191382511	Gain	0.011649	RP11-113I24.1,RP11-547I7.2,RP11-161I10.1,RP11-463J7.1,RP11-463J7.3,HNRNPA1P46,RP11-309H21.3,RP11-309H21.4,RP11-309H21.2,BRINP3,RP11-547I7.1,RP11-463J7.2
1	159124442	160535845	Gain	0.0207575	RNA5SP60,DARC,MPTX1,OR10J2P,OR10J3,OR10J7P,OR10J8P,OR10J9P,OR10J4,OR10J1,OR10J5,RP11-740C1.2,OR10AE1P,APCS,OR10J6P,CRPP1,CRP,RP11-419N10.5,DUSP23,SLAMF8,SNORD64,RP11-190A12.8,hsa-mir-4259,AL590560.1,SLAMF9,RP11-226L15.1,RP11-226L15.5,PIGM,IGSF8,RP11-536C5.7,PEA15,AL121987.1,RP11-574F21.2,RP11-179G5.1,SUMO1P3,Y_RNA,NHLH1,RNU4-42P,AL138930.1,AL138930.2,CADM3,CTA-134P22.2,FCER1A,RP11-180D21.3,C1orf2…
11	47733390	49042688	Loss	0.0074303	Y_RNA,snoU13,RP11-692M12.5,RNA5SP340,Y_RNA,RP11-692M12.4,RP11-793I11.1,AC103828.1,MIR3161,OR4B1,OR4B2P,OR4X1,OR4S1,OR4C3,OR4C4P,OR4C5,OR4C2P,OR4C10P,OR4C9P,OR4R1P,OR4A47,OR4A48P,OR4A46P,OR4A40P,OR4A43P,OR4A45P,OR4A42P,OR4A44P,RP11-56P9.6,RP11-56P9.4,RP11-56P9.8,TRIM51GP,TRIM53CP,FNBP4,OR4X2,OR4A41P,RP11-56P9.5,RP11-56P9.10,TRIM51CP,RP11-56P9.11,AGBL2,NUP160,PTPRJ
2	162333112	163744364	Gain	0.00961489	AHCTF1P1,snoU13,AC062022.1,KRT18P46,AC092841.1,RPEP5,AC008063.2,TIMM8AP1,EIF3EP2,AC008063.3,RNA5SP109,GCG,AC007750.5,IFIH1,AC007740.1,DPP4,FAP,GCA,SLC4A10,KCNH7
11	130270231	131566592	Loss	0.000406968	RP11-535N6.2,BAK1P2,PPP1R10P1,RP11-890B15.3,RN7SL167P,AP002806.1,AP002856.4,AP002856.6,RNU6ATAC12P,AP003039.3,ADAMTS15,RP11-890B15.2,SNX19,AP002856.7,AP003025.2,RP11-217L21.1,ADAMTS8,C11orf44,AP002856.5,NTM
13	50223520	51624281	Gain	0.0102245	AL135901.1,RNY4P30,CTAGE10P,RNY4P9,AL136123.1,MIR3613,MIR16-1,RPL18P10,ST13P4,RPL34P26,AL138696.1,RP11-175B12.2,RNA5SP28,RNA5SP29,EBPL,SPRYD7,DLEU2,DLEU7-AS1,RNASEH2B-AS1,TRIM13,KCNRG,DLEU1,RNASEH2B,GUCY1B2,DLEU7,KPNA3
9	78029204	79424168	Gain	0.0295474	snoU13,AL157883.1,RP11-360J12.1,AL359253.1,RBM22P5,RPSAP9,RP11-66C24.1,RP11-214N16.2,AL161626.1,AL359314.1,RP11-470F18.1,RFK,PCA3,GCNT1,PRUNE2,PCSK5
11	127731320	129018337	Loss	0.00022433	RP11-676M6.1,RP11-702B10.2,RP11-1007G5.2,RP11-264E20.2,RP11-264E20.1,RP11-740D6.3,C11orf45,RNU6-876P,Y_RNA,RP11-702B10.1,RP11-744N12.3,SENCR,KCNJ5,TP53AIP1,ETS1,FLI1,KCNJ1,ARHGAP32
11	103608043	104853392	Loss	0.00127277	MIR4693,RP11-617B3.2,RNA5SP348,RP11-681H10.1,RP11-693N9.1,DDI1,CASP12,RP11-693N9.2,CASP4,RP11-563P16.1,RP11-886D15.1,PDGFD
3	169376290	170750057	Gain	0.0013101	RP11-3K16.1,RNU6-637P,TERC,ACTRT3,RP11-816J6.3,RP11-362K14.5,RP11-362K14.7,RP11-362K14.6,KRT18P43,RP11-379K17.2,RP11-379K17.5,SEC62-AS1,RNU4-38P,RP11-379K17.9,RP11-379K17.12,RNU6-315P,Y_RNA,KRT8P13,RP11-373E16.1,RNY5P3,RPL22L1,KLF7P1,RNU1-70P,MYNN,LRRC34,LRRIQ4,LRRC31,SAMD7,RP11-379K17.4,SEC62,GPR160,RP11-543D10.2,SKIL,RP11-373E16.3,RP11-373E16.4,EIF5A2,SLC2A2,PRKCI,RP11-469J4.3,CLDN11,SLC7A14,ME…
5	145298563	146537030	Loss	0.0409856	AC005351.1,RP11-449H3.1,RP11-449H3.2,RNU7-180P,CTC-359M8.3,GPR151,RNA5SP196,RN7SL791P,KRT8P48,AC011357.1,PPP2R2B-IT1,PLAC8L1,LARS,POU4F3,CTB-1H10.1,CTB-99A3.1,SH3RF2,RP11-118M9.3,RBM27,TCERG1,PPP2R2B,CTC-359M8.1
3	122940956	124313603	Gain	0.0122297	RP11-797D24.3,RP11-797D24.4,MYLK-AS2,RP11-9N20.3,SNORA5,AC117401.1,MIR5002,RPL7P15,RNU6-143P,PTPLB,CCDC14,ROPN1,PDIA5,SEC22A,ADCY5,MYLK-AS1,MYLK,KALRN
9	94275403	95640144	Gain	0.0109391	PAICSP2,MIR3910-2,RP11-118F2.2,HSPE1P22,RP11-100G15.2,RP11-100G15.3,RP11-100G15.4,RP11-100G15.5,MTND4P15,snoU13,RP11-100G15.10,BEND3P2,RP11-62C3.6,SNORA84,RP11-62C3.8,OMD,MIR4670,RP11-19J3.5,RP11-476B13.2,RNU6-714P,EEF1DP2,SPTLC1,LINC00475,NOL8,ASPN,BICD2,ANKRD19P,ZNF484,RP11-100G15.7,IARS,CENPP,OGN,ECM2,ROR2,IPPK
7	8065111	9428507	Gain	0.0218635	AC006042.6,AC007009.2,AC007009.1,RP4-668E10.2,AC007128.1,RP4-594A5.1,AC009500.2,GLCCI1,ICA1,NXPH1
3	183125665	184475339	Gain	0.000732976	SNORA63,SNORA81,SNORA63,SNORA4,RP11-393B14.2,KLHL6-AS1,RP11-14I2.2,AC131160.1,YEATS2-AS1,MAP6D1,RP11-315J22.5,MIR4448,ABCC5-AS1,EEF1A1P8,HTR3D,HTR3C,Y_RNA,HTR3E-AS1,HTR3E,HSP90AA5P,RP11-778D9.13,RP11-778D9.12,RP11-778D9.4,MIR1224,ALG3,CAMK2N2,SNORD66,POLR2H,EIF2B5-IT1,MAGEF1,RP11-329B9.4,RP11-329B9.3,RP11-329B9.5,LINC00888,PARL,CYP2AB1P,ABCC5,RP11-778D9.9,DVL3,ABCF3,VWA5B2,ECE2,EIF4G1,FAM131A,CLC…
3	59705136	61026350	Gain	0.0325174	NPCDR1,RP11-641C17.4,RP11-641C17.2,RP11-641C17.3,RP11-641C17.1,U3,FHIT
3	163728579	165021836	Gain	0.0013101	MIR1263,MIR720,Y_RNA,RP11-71H9.2,RP11-747D18.1,SLITRK3,RP11-71H9.1,SI,RP11-85M11.2
2	192279057	193569240	Gain	0.0246357	DNAJB1P1,AC013401.2,SDPR,AC013401.1,MYO1B,NABP1,AC098872.3,AC098617.1,TMEFF2
1	160668690	161937623	Gain	0.0207575	RP11-312J18.3,ITLN1,RP11-312J18.5,RP11-312J18.6,RP11-312J18.7,RP11-544M22.3,TSTD1,USF1,AL591806.1,KLHDC9,NIT1,DEDD,ACA64,UFC1,RP11-297K8.2,USP21,B4GALT3,ADAMTS4,AL590714.1,APOA2,TOMM40L,MIR5187,MPZ,C1orf192,RP11-122G18.5,RP11-122G18.8,RRM2P2,RNU6-481P,RP11-122G18.7,HSPA6,RPS23P10,RP11-5K23.5,HSPA7,RPS23P9,RPL31P11,Y_RNA,RN7SL466P,RP11-474I16.8,RP11-456P18.2,CD48,SLAMF7,LY9,RP11-544M22.1,ITLN2,F11…
2	178040695	179294943	Gain	0.0123434	AC079305.5,Y_RNA,KRT8P40,MIR4444-2,MIR3128,AC079305.10,RP11-337N6.2,RP11-337N6.1,AC019080.1,snoU13,TTC30B,TTC30A,API5P2,AC011998.2,RNU6-629P,AC011998.4,RNU5E-9P,RP11-65L3.1,AC079305.8,HNRNPA3,DNAJC19P5,AC074286.1,AC073834.3,AC012499.1,AC011998.1,CYCTP,RBM45,AC009948.5,NFE2L2,PDE11A,OSBPL6,AGPS
2	204590336	205840114	Gain	0.0198618	KRT18P39,AC125238.1,NPM1P33,RNU6-474P,DSTNP5,AC106901.1,AC016903.1,ICOS,AC009965.1,AC009965.2,AC009498.1,AC016903.2,CD28,CTLA4,PARD3B
2	165864050	167105771	Gain	0.00961489	RN7SL455P,MAPRE1P3,AC009495.1,Y_RNA,RN7SKP152,SCN3A,GALNT3,AC009495.2,AC009495.4,AC009495.3,TTC21B-AS1,AC013463.2,SCN2A,CSRNP3,AC010127.3,SCN1A,SCN9A,TTC21B
3	155242118	156464050	Gain	0.0013101	RPL6P7,AC104472.1,RP11-674E16.1,SETP14,RP11-294L13.1,KCNAB1-AS1,RP11-305K5.1,TIPARP-AS1,METTL15P1,C3orf33,SLC33A1,GMPS,VN2R1P,ALG1L15P,RP11-118D22.3,KCNAB1-AS2,SSR3,TIPARP,PLCH1,KCNAB1
18	55996313	57137074	Loss	0.000555643	RP11-845C23.2,RP11-1151B14.2,MIR122,AC105105.1,RP11-1151B14.4,SNORD28,RPL9P31,RP11-126O1.5,MRPL37P1,RP11-108P20.1,RP11-108P20.3,RP11-108P20.2,RN7SL112P,RNU6-219P,U8,RNU2-69P,RP11-685A21.1,GRP,RP11-845C23.3,RP11-1151B14.3,OACYLP,SEC11C,RAX,CPLX4,RP11-27G24.1,RP11-27G24.3,NEDD4L,ALPK2,RP11-126O1.2,MALT1,RP11-126O1.4,RP11-108P20.4,LMAN1,CCBE1,ZNF532
9	86680675	87896172	Gain	0.0295474	RP11-158D2.1,RP11-361M4.1,UBE2V1P10,RP11-158D2.2,SLC28A3,RP11-380F14.2,NTRK2
2	142914297	144124091	Gain	0.049089	AC016706.1,AC092578.1,AC013444.1,RP11-470B22.1,AC013444.2,MTND6P11,MTND5P24,MTND4P22,AC013437.4,MTND3P9,AC013437.6,AC013437.7,RP11-190J23.1,AC013437.2,ARHGAP15,AC096558.1,RP11-570L15.2,KYNU
13	79330093	80543901	Gain	0.00684491	RPL21P111,HSPD1P8,CCT5P2,NIPA2P5,RNA5SP33,LINC01068,LINC01038,LINC00331,BCAS2P3,RBM26-AS1,NDFIP2-AS1,RBM26,NDFIP2,LINC00382
1	211834028	213037243	Gain	0.00616225	FDPSP8,RN7SL344P,Y_RNA,RP11-565J7.1,SNORA26,RPL21P28,MIR3122,RN7SKP98,RP11-384C4.6,RP11-384C4.3,SNORA16B,RP11-384C4.2,RP11-61J19.2,RP11-61J19.3,RP11-61J19.4,RN7SL512P,RP11-338C15.5,FAM71A,RP11-338C15.2,RNU6-423P,RP11-348H3.2,FLVCR1-AS1,RP11-348H3.4,RP11-348H3.5,NEK2,RP11-122M14.1,RP11-122M14.3,RP11-552D8.1,DTL,RP11-15I11.2,RP11-15I11.3,RP11-384C4.7,TMEM206,NENF,ATF3,RP11-338C15.3,NSL1,TATDN3,C1or…
9	101671656	102853878	Gain	0.0040814	RP11-92C4.6,RNA5SP290,RP11-96L7.2,RN7SL794P,ALG2,RN7SKP225,KRT8P11,RP11-547C13.1,UPF3AP3,TGFBR1,SEC61B,NAMA,NR4A3,RP11-60I3.5,STX17,RP11-60I3.4,RP11-554F20.1,COL15A1,ERP44
9	104163007	105328165	Gain	0.0040814	RP11-490D19.11,RP11-490D19.8,AL591377.1,PPP3R2,MTND3P4,ARL2BPP7,RNU6-329P,AL391867.1,RP11-342F21.1,ZNF189,ALDOB,RP11-490D19.6,TMEM246,RNF20,GRIN3A,LINC00587
2	182139509	183301778	Gain	0.0123434	MIR4437,NEUROD1,AC013733.3,AC013733.4,AC013733.5,RNU6ATAC19P,RP11-366L5.1,KRT18P29,RNA5SP113,AC064837.1,RN7SL267P,AC020595.1,ITGA4,SSFA2,AC104820.2,PPP1R1C,PDE1A,CERKL
3	171015828	172177696	Gain	0.0013101	Y_RNA,RP11-185E8.1,RNU6-348P,RP11-263C16.2,snoU13,TMEM212-IT1,RP11-423E7.1,RN7SL141P,AC092964.2,AC092964.1,BZW1P1,PP13439,TMEM212-AS1,GHSR,PLD1,TMEM212,TNIK,FNDC3B
2	95737679	96895631	Gain	0.0314804	FABP7P2,AC009238.6,AC009238.8,AC009238.7,UBTFL5,AC133104.2,TRIM43B,AC009237.4,AC009237.2,AC009237.5,AC009237.6,TRIM64FP,RP11-440D17.3,AC009237.8,AC009237.11,RP11-440D17.4,AC009237.10,OR7E102P,TRIM51JP,AC009237.13,TRIM43,AC009237.14,RP11-440D17.1,RP11-440D17.2,AC009237.17,AC009237.16,AC008268.1,AC008268.2,LINC00342,RN7SL210P,DUSP2,AC012307.2,ZNF2,AC092835.2,KCNIP3,UBTFL3,FAHD2CP,GPAT2,ADRA2B,ASTL,…
1	155157071	156304328	Gain	0.0458959	MUC1,MIR92B,MTX1,RP11-263K19.6,MTX1P1,AL713999.1,SCAMP3,RUSC1,MIR555,RNU6-106P,ASH1L-IT1,snoU13,RNU6-1297P,POU5F1P4,RP11-29H23.7,RP11-29H23.6,RP11-29H23.4,RP11-243J18.2,RP11-101O6.2,RNU4-19P,SNORA42,SCARNA4,RXFP4,RP11-336K24.12,RP11-336K24.5,SSR2,RAB25,MEX3A,AL355388.1,SNORA26,BGLAP,PAQR6,C1orf85,VHLL,AL589685.1,RP11-201K10.3,TRIM46,THBS3,RP11-263K19.4,GBA,FAM189B,CLK2,HCN3,PKLR,FDPS,RUSC1-AS1,AS…
3	151041514	152190320	Gain	0.0013101	P2RY13,MRPL42P6,RP11-312P21.2,MIR5186,AC069067.1,RP11-64D22.1,RP11-64D22.2,MBNL1-AS1,TMEM14E,Y_RNA,P2RY12,IGSF10,RP11-454C18.1,AADACL2,AADAC,SUCNR1,RP11-246A10.1,RP11-362A9.3,RP11-454C18.2,RP11-64D22.5,MBNL1,MED12L
2	153889620	155015747	Gain	0.0155531	ATP5F1P4,AC079150.2,AC012501.1,AC012501.3,SNORD56,RPRM,DNAJA1P2,AC008166.1,AC011901.2,AC079150.3,AC012501.2,GALNT13
7	12552159	13674145	Gain	0.0151315	AC005281.2,AC011891.5,CTD-2320J21.1,SNORA64,RN7SKP228,RBMX2P4,AC005281.1,SCIN,ARL4A,AC006000.5,AC011288.2
1	202806240	203928375	Gain	0.00744067	RP11-480I12.5,RP11-480I12.9,HNRNPA1P59,Y_RNA,RP11-38O14.5,RP11-38O14.6,MYOG,RP11-335O13.7,RP11-335O13.8,MYBPH,CHI3L1,NPM1P40,RP11-134P9.3,LINC01136,RNU6-487P,FMOD,RP11-435P24.2,RP11-435P24.3,RP11-90O23.1,SNORA77,RP11-397P13.6,RP11-397P13.7,KRT8P29,HSPE1P6,CBX1P3,RP11-480I12.7,RABIF,KLHL12,ADIPOR1,CYB5R1,TMEM183A,ADORA1,CHIT1,BTG2,PRELP,OPTC,LAX1,ZBED6,SNRPE,PPFIA4,ATP2B4,ZC3H11A
3	186868325	187973478	Gain	0.000732976	RTP1,snoU13,RP11-567G11.1,SST,RP11-211G3.2,RP11-132N15.1,RP11-132N15.2,LPP-AS2,AC022498.1,RPL39L,RP11-208N14.4,MASP1,RTP4,RTP2,BCL6,RP11-30O15.1,RP11-44H4.1,RP11-132N15.3,RP11-211G3.3,RP11-430L16.1,LPP
2	104250237	105363172	Gain	0.0496022	AC013727.2,AHCYP3,AC068535.2,AC068535.3,U3,AC013402.4,AC013402.5,AC068535.5,AC068057.1,SNORA72,AC013727.1,AC096554.1,AC013402.1,AC013402.3,LINC01114,RP11-76I14.1,LINC01102,LINC01103
3	153539540	154621683	Gain	0.0013101	U8,RPL21P42,snoU13,DDX50P2,CTD-2501O3.3,RPL9P15,RP11-656A15.1,CTD-2501O3.2,RP11-439C8.1,RP11-23D24.2,RP11-217E22.5,ARHGEF26-AS1,ARHGEF26,DHX36,GPR149
3	121695697	122780412	Gain	0.0208064	Y_RNA,SNORD112,AC068754.1,HNRNPA1P23,WDR5B,RP11-299J3.6,RP11-592P9.1,EIF4BP8,snoU13,RP11-67L2.2,AC078794.1,ILDR1,CD86,CASR,CSTA,CCDC58,FAM162A,PARP9,PARP15,HSPBAP1,RP11-299J3.8,KPNA1,DTX3L,PARP14,DIRC2,SEMA5B
5	141475367	142557088	Gain	0.0413305	AC005215.1,RPS12P10,AC005370.1,AC005592.3,NDFIP1,SPRY4,FGF1,AC005592.1,ARHGAP26-AS1,AC005592.2,ARHGAP26
8	5120503	6207718	Loss	0.0429035	RP11-745K9.2,RPL23AP54,RP5-991O23.1,RP11-728L1.1,RN7SKP159,RP11-158A14.1,RP11-281H11.1,RP11-124B13.1
11	64592909	65670509	Loss	6.22e-05	AP001187.11,AP001187.1,RP11-665N17.4,MIR192,MIR194-2,GPHA2,BATF2,AP000436.4,SAC3D1,RN7SL114P,ZFPL1,TMEM262,AP003068.9,ZNHIT2,AP003068.12,FAU,MRPL49,RNU2-23P,AP003068.17,SPDYC,AP003068.18,PGAM1P8,CDC42EP2,TIGD3,RP11-867O8.5,AP000769.7,SNRPGP19,SCYL1,SSSCA1-AS1,FAM89B,AP001362.1,KCNK7,MIR4690,SIPA1,MIR4489,RN7SL309P,KRT8P26,AP5B1,AP001266.1,OVOL1,OVOL1-AS1,RP11-770G2.5,FIBP,CCDC85B,CDC42BPG,EHD1,AT…
9	116389290	117454582	Gain	0.0040814	RP11-18B16.1,AL157702.1,RP11-534I8.1,MIR455,ORM1,ORM2,RP11-9M16.2,RP11-9M16.3,snoU13,RP11-402G3.6,Y_RNA,AL160275.1,RP11-402G3.3,RP11-18B16.2,AMBP,KIF12,AKNA,ATP6V1G1,C9orf91,RP11-402G3.5,ZNF618,COL27A1,DFNB31
2	183304777	184368603	Gain	0.0123434	RPL31P15,Y_RNA,RNU6-1122P,Y_RNA,SNORA77,KRT8P10,RP11-438L19.1,LIN28AP1,FRZB,DUSP19,AC064871.3,PDE1A,DNAJC10,NCKAP1,NUP35
11	121487347	122550372	Loss	0.00127277	RNU6-256P,MIR125B1,BLID,MIRLET7A2,MIR100,RP11-716H6.1,RNU4ATAC10P,RNU4ATAC5P,RNU6-592P,GLULP3,RP11-266E8.2,RP11-166D19.1,RP11-716H6.2,SORL1,RP11-820L6.1,UBASH3B
2	150793156	151854710	Gain	0.0155531	AC104777.3,AC113610.1,AC104777.2,AC104777.1,AC104777.4,AC023469.2,AC016682.1,RND3
9	85452950	86514454	Gain	0.0295474	RN7SKP242,RNU4-29P,RP11-439K3.3,snoU13,SNORD112,RNU4-15P,RP11-575L7.2,RASEF,RP11-439K3.1,UBQLN1,RP11-522I20.3,RP11-575L7.4,IDNK,GKAP1,KIF27,FRMD3
2	126480969	127519028	Gain	0.0496022	AC097499.2,AC114813.1,AC023347.2,YWHAZP2,AC013474.4,RNU6-675P,AC023347.1,GYPC,AC097499.1
2	200643495	201681614	Gain	0.0246357	AC108032.1,RN7SL717P,Y_RNA,AC105381.1,RNU1-133P,AC073043.1,C2orf47,KCTD18,SGOL2,AC007163.6,BZW1,FTCDNL1,C2orf69,TYW5,AOX1,AOX3P,AOX2P,AC007163.3,SPATS2L
1	196032100	197072294	Gain	0.011649	MIR4735,CFHR1,CFH,CFHR3,CFHR5,F13B,ASPM,KCNT2,CFHR2,CFHR4
2	133700310	134735132	Gain	0.0496022	AC011755.1,RNU6-579P,RN7SKP154,NCKAP5-IT1,AC011243.1,RN7SKP93,AC010890.1,NCKAP5
11	3442540	4470939	Loss	0.0295474	RP13-726E6.3,AC127526.1,RPS24P14,AP006294.2,ART5,Y_RNA,CHRNA10,snoU13,RNU6-1143P,RNU7-50P,AC090587.2,AC090587.5,AC090587.4,MIR4687,AC090804.1,SNORA7,RP11-438N5.4,HNRNPA1P76,RP11-438N5.2,RPS29P20,RRM1-AS1,OR55B1P,RP11-23F23.3,SSU72P5,SSU72P2,SSU72P6,SSU72P3,SSU72P7,OR52B4,OR52B3P,OR52P2P,AC010930.1,OR52K2,FAM86GP,RPS3AP39,OR7E117P,TRPC2,Y_RNA,PGAP2,RHOG,RRM1,RP11-23F23.2,SSU72P4,TRIM21,OR51R1P,RP1…
11	36669982	37665649	Loss	0.0208064	CTD-2119L1.1,C11orf74
1	227180859	228202192	Gain	0.0310969	RP11-1B20.1,RP11-211A18.2,RP11-211A18.1,CTD-2090I13.2,CTD-2090I13.3,BTF3P9,RP11-275O4.4,TUBB8P10,TUBB8P9,RNA5SP77,AL592310.1,JMJD4,MIR5008,RP5-1087E8.3,CTD-2090I13.1,RP11-275O4.3,RP4-566D2.1,ZNF847P,PRSS38,WNT9A,CICP26,CDC42BPA,ZNF678,SNAP47,SNAP47-AS1,WNT3A
2	219513547	220531768	Gain	0.0198618	BCS1L,RP11-459I19.1,AC009974.11,RNU6-642P,KRT8P30,CDK5R2,FEV,MIR375,MIR3131,RP11-33O4.1,RN7SL764P,FAM134A,ABCB6,AC068946.1,ANKZF1,STK16,DNAJB2,MIR153-1,RESP18,AC053503.2,DES,AC053503.6,RP11-316O14.1,CHPF,RP11-256I23.1,MIR3132,RP11-256I23.2,INHA,RN7SKP213,AC009955.8,RP11-256I23.3,ZNF142,RNF25,TTLL4,PRKAG3,WNT6,WNT10A,AC073128.10,AC097468.7,LINC00608,CRYBA2,AC097468.4,CCDC108,IHH,NHEJ1,SLC23A3,CNPP…
11	123953621	124947149	Loss	0.00127277	OR10D4P,OR10N1P,OR10D1P,OR10D3,OR8F1P,OR8G3P,OR8G2P,OR8G7P,OR8G5,SLC5A4P1,OR8D1,OR8D2,OR8B7P,OR8B6P,OR8B5P,OR8B1P,OR8C1P,OR8B2,OR8B3,OR8X1P,OR8B4,OR8B8,OR8A2P,OR8B9P,OR8B10P,OR8A3P,RP11-728D14.6,OR8B12,OR8A1,OR8Q1P,RNA5SP352,RP11-677M14.2,VSIG2,ESAM,RP11-677M14.6,RP11-677M14.5,AP000866.1,RP11-664I21.5,RP11-664I21.6,HEPN1,PANX3,TBRG1,SPA17,NRGN,RP11-677M14.3,RP11-677M14.7,ROBO3,ROBO4,HEPACAM,CCDC1…
1	181347060	182362834	Gain	0.011649	RNA5SP70,RP11-33M22.2,RN7SKP229,RP11-538D16.2,GS1-122H1.1,GS1-122H1.3,RNU6-152P,RP11-416K24.1,RP11-416K24.2,ZNF648,GLUL,RP11-538D16.3,GS1-122H1.2,CACNA1E
2	156580730	157597363	Gain	0.0155531	AC073551.1,snoU13,snoU13,AC011308.1,AC093375.1,NR4A2,GPD2
2	197741266	198758700	Gain	0.015695	HNRNPA3P15,AC017035.2,AC013264.2,ATP5G2P3,AC010746.3,NPM1P46,SNORA4,RNU6-1029P,HSPE1,AC020550.7,MARS2,ANKRD44-IT1,SF3B1,COQ10B,HSPD1,HSPE1-MOB4,MOB4,BOLL,PGAP1,ANKRD44,RFTN2,AC011997.1,PLCL1
2	112453293	113454512	Gain	0.0496022	AC093166.2,AC093166.3,MIR4771-2,AC104651.1,RN7SL297P,AC104651.2,AC104651.3,snoU13,AC115115.3,AC115115.2,AC115115.4,Y_RNA,AC012442.6,AC079922.2,AC079922.3,AC093166.4,FBLN7,ZC3H6,RGPD8,POLR1B,CHCHD5,AC012442.5,SLC20A1,ANAPC1,MERTK,TMEM87B,ZC3H8,TTL
2	148934282	149934099	Gain	0.0155531	SNORA48,AC019070.1,AC017080.1,RNU2-9P,UBBP3,AC105402.2,AC105402.3,AC105402.1,TXNP5,AC105402.4,EPC2,KIF5C,MBD5,LYPD6B
9	96425864	97415717	Gain	0.0109391	MIR4291,RP11-53B5.1,RP11-231K24.2,CYCSP24,MIRLET7A1,MIRLET7F1,RP11-2B6.2,MIRLET7D,snoU13,RNU6-677P,VDAC1P11,NUTM2F,RP11-307E17.9,RNU6-669P,PHF2,BARX1,RP11-2B6.3,MIRLET7DHG,ZNF169,RP11-307E17.8,HIATL1,RP11-533K9.3,PCAT7,FBP2,PTPDC1,FBP1
3	58123250	59118977	Gain	0.0325174	FLNB-AS1,RPP14,RP11-80H18.4,PDHB,RP11-802O23.3,RP11-359I18.5,KCTD6,RP11-359I18.1,RP11-475O23.2,ABHD6,RPP14,ACOX2,RP11-475O23.3,FAM3D,CTD-2185K10.1,FLNB,DNASE1L3,PXK,FAM107A,RP11-147N17.1,C3orf67
11	42581290	43553885	Loss	0.0349244	CTD-2537L20.1,RP11-111A24.2,RP11-111A24.1,Y_RNA,RP11-484D2.4,RN7SKP287,RP11-484D2.3,CTBP2P6,API5,RP11-484D2.2,RP11-484D2.5,HNRNPKP3,TTC17
17	31958182	32943642	Gain	0.0353679	RP11-31I22.2,RP11-118G23.2,RP11-118G23.1,AC024610.1,RP11-17M24.2,TLK2P1,CTC-304I17.4,CTC-304I17.3,RNA5SP438,AC005549.1,RP11-215E13.2,AC005549.2,AC005549.3,CCL2,CCL7,CCL11,CCL8,RP11-521P1.1,CCL13,CCL1,AC011193.1,C17orf102,RP11-17M24.1,CTC-304I17.2,CTC-304I17.5,TMEM132E,ASIC2,RP11-215E13.1
11	92388934	93309193	Loss	0.00127277	snoU13,RP11-676F20.2,SNRPGP16,RP11-676F20.1,RPL26P31,RP11-573M3.3,RP11-573M3.4,RP11-755E23.3,AP004242.1,RP11-288E14.2,RN7SL223P,RP11-203F8.1,MTNR1B,CCDC67,SMCO4,SLC36A4,FAT3
2	110425137	111400661	Gain	0.0496022	BMS1P19,AC109815.2,RPL22P11,GPAA1P1,ZBTB45P1,LINC01123,AC013268.3,AC013268.4,MIR4267,MIR4436B2,AC013268.1,AC092664.1,MIR4436B1,AC140479.1,AC112229.6,AC112229.1,LINC01106,ZBTB45P2,AC112229.4,RP13-1039J1.3,LIMS3L,AC108938.3,AC123886.2,AC114776.1,RGPD5,LIMS3,AC013271.3,MALL,LINC00116,RP13-1039J1.2,LIMS3,NPHP1,RP11-1223D19.1,RGPD6,BUB1,RP13-1039J1.4
8	11648590	12562454	Loss	0.0226715	RP11-297N6.4,RP11-589N15.2,RP11-589N15.1,OR7E158P,OR7E161P,DEFB136,DEFB135,DEFB134,RP11-481A20.4,RP11-481A20.10,RP11-481A20.11,RP11-481A20.8,OR7E160P,RP11-1236K1.11,RNA5SP253,DEFB108P3,ZNF705D,RP11-1236K1.8,USP17L7,USP17L2,DEFB109P3,FAM90A2P,ALG1L11P,AC145124.1,FAM85A,ENPP7P12,ABC12-47043100G14.2,RNA5SP254,DEFB108P4,ZNF705C,RP11-351I21.7,RP11-351I21.6,FAM90A25P,ALG1L12P,AC087203.1,RP11-419I17.1,A…
11	107049000	107962204	Loss	0.000708023	SMARCE1P1,CTD-2355J17.2,AP000889.2,AP000889.1,SLN,CTD-2651C21.3,AP001024.2,AP001024.1,RP11-832N8.1,Y_RNA,RP11-819C21.1,ALKBH8,AP000889.3,AP002353.1,RAB39A,CUL5,CWF19L2,ELMOD1,SLC35F2
2	222471517	223443760	Gain	0.0198618	AC068489.1,AC009302.2,HSPA9P1,AC009302.4,Y_RNA,NANOGP2,GAPDHP49,RP11-16P6.1,CCDC140,RP11-384O8.1,RNU6-619P,PAX3,AC010980.2,FARSB,SGPP2
3	194177323	195143852	Gain	0.000732976	RP11-384A12.1,AC108676.1,RNU6-1101P,AC046143.6,TMEM44-AS1,RP11-534C12.1,AC046143.2,AC046143.1,FAM43A,AC106706.1,AC090505.4,AC090505.1,XXYLT1-AS1,MIR3137,RN7SL36P,RNU6-25P,AC069213.4,Y_RNA,ATP13A3,LINC00884,TMEM44,AC046143.3,AC090505.6,AC090505.5,XXYLT1-AS2,ACAP2-IT1,LSG1,XXYLT1,ACAP2
2	202527578	203484554	Gain	0.0198618	AC007279.2,Y_RNA,UBE2V1P11,AC007242.1,RNU6-440P,AC007358.1,RP11-107N15.1,snoU13,AC079354.5,PSMA2P3,DAZAP2P1,AC079354.6,AC079354.2,SNORD70,SNORD70,SNORD11B,SNORD11,RN7SL753P,AC064836.3,RP11-686O6.1,RN7SL40P,RP11-686O6.2,RP11-27M5.1,AC073410.1,AC009960.1,AC009960.2,AC009960.4,AC009960.5,AC009960.7,AC009960.6,MTND4P30,AC009960.3,MPP4,CDK15,AC079354.3,SUMO1,ALS2,FZD7,AC079354.1,NOP58,BMPR2
3	193076941	194034535	Gain	0.000732976	ATP13A4-AS1,OPA1-AS1,Y_RNA,RN7SL447P,RP11-528A4.3,DPPA2P3,RP11-135A1.2,RN7SL215P,RP11-175P19.2,RP11-528A4.2,RP11-699L21.1,RP11-699L21.2,RP11-135A1.3,RP11-513G11.4,RP11-513G11.3,RP11-513G11.2,LINC00887,ATP13A5,ATP13A4,OPA1,RP11-407B7.1,HES1
3	196020885	196974182	Gain	0.000188269	AC069257.6,RNU6-910P,RNU6-1279P,RN7SL434P,RN7SL738P,AC083822.2,UBXN7-AS1,AC117490.2,CTD-2002J20.1,SMCO1,AC092933.4,AC092933.3,WDR53,LINC01063,CEP19,RNU6-646P,U4,RNU6-42P,NCBP2,NCBP2-AS1,NCBP2-AS2,AC011322.1,MFI2-AS1,RP11-447L10.1,TCTEX1D2,TM4SF19,TM4SF19-AS1,TM4SF19,FBXO45,NRROS,PIGX,AC127904.2,PIGZ,RNF168,PAK2,SENP5,MFI2,DLG1,UBXN7
3	134036421	134986213	Gain	0.0023226	RP11-375I20.6,RPL39P5,HMGN1P9,AC010207.1,HMGB3P13,MIR4788,RP11-445J14.1,RNU6-1174P,RNA5SP141,RP11-200A1.1,ANAPC13,AMOTL2,EPHB1,KY,CEP63
9	108128891	109076498	Gain	0.0040814	RALGAPA1P,RP11-235C23.5,TAL2,RP11-18B3.3,RP11-18B3.2,SLC25A6P5,RP11-6F6.1,SLC44A1,FSD1L,FKTN,TMEM38B,RP11-308N19.1
11	105373498	106268454	Loss	0.000708023	RNU4-55P,AP000673.1,RNU6-277P,RP11-680E19.2,AP000641.1,MSANTD4,KBTBD3,AASDHPPT,RP11-677I18.3,RP11-677I18.4,RP11-680E19.1,RP11-94P11.4,GRIA4
2	218458030	219393414	Gain	0.0198618	AC010886.2,RPL7L1P9,AC009469.1,AC010136.2,CXCR2P1,CXCR2,CXCR1,snoU13,HMGB1P9,RP11-378A13.1,GPBAR1,AAMP,snoU13,AC021016.7,C2orf62,AC021016.6,RP11-378A13.2,MIR26B,RN7SKP38,RUFY4,ARPC2,AC021016.8,SLC11A1,CTDSP1,VIL1,DIRC3,TNS1,USP37,PNKD,TMBIM1
9	84521499	85451415	Gain	0.0295474	SPATA31D5P,RP11-383M4.2,SPATA31D4,SPATA31D3,SPATA31D2P,SPATA31B1,DDX10P2,RP11-388B24.4,RP11-15B24.1,RP11-15B24.2,RP11-15B24.3,RP11-15B24.4,RPS6P12,RP11-383M4.6,SPATA31D1,RP11-15B24.5
2	117352830	118281135	Gain	0.0496022	RP11-338I24.1,AC062016.1,AC062016.2,AC062016.3,MTND1P28,MTND2P21,RNU7-190P,AC092170.1,AC012365.3
5	128881176	129771299	Loss	0.0404556	RNU6ATAC10P,RNA5SP191,HSPA8P4,AC004769.1,RNU7-53P,KIAA1024L,CHSY3,ADAMTS19,CTC-575N7.1
5	143569148	144493186	Gain	0.0413305	CKS1BP5,CTB-85P21.1,RN7SKP246,CTC-342P15.1,CTC-218H9.1,KCTD16
3	177863023	178783926	Gain	0.000732976	RNA5SP148,RP11-33A14.3,LINC01014,RP11-33A14.1,ZMAT3,KCNMB2,RP11-385J1.2
2	139763080	140682645	Gain	0.049089	SNORA72,MRPS18BP2,AC012497.2,AC078851.1,AC078851.2,AC062021.1,AC016710.1
1	156855796	157767307	Gain	0.0458959	MIR765,RN7SL612P,RP11-110J1.2,KRT8P45,ETV3L,CYCSP52,RP11-85G21.3,RP11-85G21.2,RP4-801G22.2,RP4-801G22.3,RP11-367J7.4,VDAC1P9,PEAR1,ARHGEF11,ETV3,RP11-85G21.1,FCRL5,FCRL3,RP11-367J7.3,FCRL2,FCRL1,LRRC71,RP11-71G12.1,FCRL4
2	111536213	112442244	Gain	0.0496022	RPL5P9,AC108463.1,AC108463.2,RP11-181E10.3,RP11-803D5.4,RPS14P4,MIR4435-2,AC068491.3,AC017002.2,RP11-68E19.1,AC017002.4,AC093166.1,AC096670.3,BCL2L11,AC068491.2,AC017002.1,ACOXL,MIR4435-1HG
3	128110771	129017361	Gain	0.0040814	DNAJB8,TMED10P2,C3orf27,POU5F1P6,SNORA24,MARK2P8,RN7SL698P,RPS15AP16,RP11-221E20.5,RP11-221E20.4,MARK2P6,RP11-723O4.9,RP11-723O4.3,RP11-434H6.2,GP9,snoU13,snoU13,RP11-434H6.6,RP11-434H6.7,RPS27P12,GATA2,RP11-475N22.4,RPN1,FTH1P4,ACAD9,RP11-723O4.6,EFCC1,RAB43,ISY1,CNBP,HMCES,DNAJB8-AS1,RAB7A,RP11-723O4.2,KIAA1257,ISY1-RAB43,EEFSEC,COPG1
9	132785906	133682926	Gain	0.018092	RP11-138E2.1,Y_RNA,AL360004.1,AL354898.1,RN7SL665P,snoU13,RP11-57C19.2,RP11-57C19.6,GPR107,NCS1,ASS1,FUBP3,PRDM12,EXOSC2,FNBP1,ABL1,HMCN2
1	199598643	200499862	Gain	0.00744067	RP11-2L13.1,RP11-567B20.1,RNU6-778P,RP11-567B20.2,RNU6-716P,RNU6-609P,RNU6-570P,AC096633.1,RP11-47A17.2,FAM58BP,RP11-532L16.3,RP11-532L16.1,RP11-469A15.2,LINC00862,ZNF281,NR5A2
5	137167985	138066767	Gain	0.0413305	AC106753.1,RP11-325L7.1,RP11-325L7.2,RNU6-1148P,WNT8A,snoU13,RNU6-460P,RNU6-888P,KIF20A,RP11-166J22.1,RN7SL682P,RP11-256P1.1,REEP2,RP11-461O14.3,EGR1,RPL7P19,AC011385.1,AC011385.2,SNORD63,SNORD63,CTB-164L20.1,snoU13,RP11-381K20.2,MYOT,NME5,CDC23,GFRA3,FAM53C,ETF1,HSPA9,PKD2L2,BRD8,CDC25C,KDM3B,CTNNA1,FAM13B
11	99914998	100785448	Loss	0.00127277	RPA2P3,RN7SL222P,AP000620.1,CTD-2383M3.1,AC015600.1,RN7SKP115,CNTN5,ARHGAP42
2	184380171	185273127	Gain	0.0123434	CACYBPP2,snoU13,MIR548AE1,AC093639.1
1	225229074	226122736	Gain	0.0136602	AC092811.1,RNU6-1304P,RP11-145A3.4,PYCR2,LBR,RP11-496N12.6,RP11-145A3.1,RP11-145A3.2,EPHX1,RP11-285F7.2,TMEM63A,LEFTY1,ENAH,SRP9,RP4-559A3.7,DNAH14
3	131321323	132211993	Gain	0.0023226	MIR5704,RP11-64K7.1,RPL7P16,snoU13,RP11-65E22.2,ACPP,CPNE4,DNAJC13,NIP7P2
5	128881176	129771299	Gain	0.0413305	RNU6ATAC10P,RNA5SP191,HSPA8P4,AC004769.1,RNU7-53P,KIAA1024L,CHSY3,ADAMTS19,CTC-575N7.1
2	107421536	108303729	Gain	0.0496022	ST6GAL2-IT1,AC016994.2,PPP1R2P5,AC005040.3,AC096669.3,ST6GAL2,AC006227.1,AC096669.1,AC096669.2
2	85333407	86210170	Gain	0.049089	TCF7L1-IT1,RNU6-674P,AC093162.3,AC093162.1,AC093162.5,TGOLN2,Y_RNA,PEBP1P2,RP11-717A5.1,Y_RNA,RN7SL113P,RNU7-162P,RP11-717A5.2,Y_RNA,RNU7-64P,RN7SL251P,Y_RNA,AC016753.7,RN7SL830P,RN7SL126P,RNF181,TMEM150A,AC012454.4,RNU1-38P,RN7SKP83,AC105053.4,RP11-548P2.2,RETSAT,CAPG,SH2D6,MAT2A,GGCX,VAMP8,VAMP5,C2orf68,SFTPB,GNLY,AC105053.3,TCF7L1,ELMOD3,USP39,ST3GAL5,ATOH8
9	92821015	93693245	Gain	0.018092	IL6RP1,OR7E116P,OR7E109P,OR7E108P,OR7E31P,DIRAS2,RP11-389K14.3,SYK,RP11-555F9.2
2	101859142	102735705	Gain	0.0496022	SNORD89,MIR5696,AC092570.1,AC092570.2,AC092570.3,FLJ20373,CNOT11,RNF149,RFX8,AC092570.4,CREG2,MAP4K4,IL1R2,TBC1D8,IL1R1
3	152192282	153071321	Gain	0.0013101	RP11-788A4.1,ATP5LP5,P2RY1,RP11-38P22.2,HMGN2P13,RP11-529G21.3,RAP2B,RN7SL300P,RP11-362A9.3,RP11-529G21.2
1	246185981	247065432	Gain	0.00744067	RP11-83A16.1,RP11-36N20.1,CHCHD4P5,RNU6-1283P,SMYD3-IT1,Y_RNA,RP11-690C23.2,RP11-690C23.5,RP11-690C23.3,RP11-439E19.1,RP11-452J6.2,RP11-439E19.9,RP11-439E19.7,RP11-439E19.6,RP11-439E19.10,SNORD112,RP11-397A15.4,SNORA25,TFB2M,SCCPDH,RP11-690C23.4,CNST,KIF28P,RP11-439E19.3,AHCTF1,SMYD3
13	60569376	61443526	Gain	0.00450528	RN7SL375P,RNY4P28,LINC00434,TARDBPP2,AL354764.1,RNA5SP31,EIF4A1P6,RNY3P5,DIAPH3-AS1,DIAPH3-AS2,LINC00378,RNY4P31,DIAPH3,TDRD3
1	175429374	176298496	Gain	0.011649	RP11-318C24.1,SCARNA3,RP11-492I21.1,RP11-195C7.2,RNU2-12P,RP11-195C7.3,RP11-357J22.1,TNR-IT1,RP11-222A5.1,RP11-318C24.2,RP11-195C7.1,TNR,RFWD2
3	142391736	143269568	Gain	0.0013101	RN7SKP25,RNU7-47P,RP11-372E1.1,RP11-372E1.7,RP11-91G21.1,RP11-80H8.3,CHST2,RP11-80H8.4,AC018450.1,PBX2P1,SLC9A9-AS2,GAPDHP47,ST13P15,RP11-372E1.4,PAQR9,RP11-372E1.6,RP13-635I23.3,SLC9A9-AS1,PLS1,TRPC1,U2SURP,SLC9A9,PCOLCE2
11	115137248	115988777	Loss	0.000708023	AP000462.3,AP000462.1,RP11-136I14.2,RP11-136I14.3,RP11-136I14.4,snoU13,AP000997.1,AP000997.2,LINC00900,AP000797.4,AP000797.1,AP000797.2,AP000462.2,RP11-136I14.5,AP000797.3,CADM1
9	109355028	110222879	Gain	0.0040814	RP11-308N19.3,RN7SKP77,RP11-308N19.5,RNA5SP292,RP11-508N12.4,RP11-508N12.3,RP11-196I18.2,RP11-196I18.3,RP11-196I18.4,RP11-417L14.1,RP11-363D24.1,AL359552.1,HMGN2P32,RAD23B,RP11-308N19.4,ZNF462,RP11-508N12.2,RP11-308N19.1
17	35207555	36075672	Gain	0.0353679	LHX1,RP11-445F12.2,RP11-333J10.2,MIR2909,CTC-268N12.3,RP11-19G24.1,HMGB1P24,RP11-19G24.2,RP11-378E13.3,RP11-378E13.4,CTC-421K24.1,RP11-697E22.1,RP11-697E22.3,RP11-333J10.3,CTC-268N12.2,C17orf78,DUSP14,DDX52,RP11-697E22.2,HNF1B,RP11-445F12.1,AATF,TADA2A,SYNRG,ACACA
7	10253687	11120085	Gain	0.0218635	U3,HSPA8P8,AC009945.4,AC004535.2,Y_RNA,RP5-855F16.1,AC005007.3,NDUFA4,PHF14
5	135514217	136350717	Loss	0.0466735	TRPC7-AS1,HSPD1P18,HNRNPA1P13,CTB-1I21.2,RNA5SP193,SMAD5,TRPC7-AS2,RP11-114H21.2,CTB-1I21.1,AC009014.3,TRPC7,SPOCK1
2	173253944	174112526	Gain	0.0246357	AC078883.4,AC078883.3,Y_RNA,snoU13,ALDH7A1P2,AC019046.1,ITGA6,PDK1,RAPGEF4-AS1,AC093818.1,AC018712.2,RAPGEF4,MLTK,MLK7-AS1
13	44882689	45743919	Gain	0.0216367	LINC01071,SMARCE1P5,snoU13,RN7SL49P,RN7SKP3,7SK,RNU6-69P,RP11-71C5.2,LINC00407,LINC00330,NUFIP1,GPALPP1,SERP2,RP11-321C24.1,GTF2F2,TSC22D1
2	212809954	213656186	Gain	0.0198618	MIR548F2,AC093865.1,AC079610.1,ERBB4
1	168727131	169572947	Gain	0.0207575	LINC00626,SUMO1P2,RPL29P7,RNA5SP66,RP5-1018K9.1,RP4-800F24.1,AL021068.1,RP1-10C16.1,CCDC181,RP1-206D15.3,SLC19A2,RP1-206D15.5,F5,SELP,LINC00970,ATP1B1,NME7,BLZF1
2	216840453	217691214	Gain	0.0198618	POLHP1,AC012513.4,RP11-566E18.3,AC012513.6,Y_RNA,AC073321.4,PSMB3P2,AC007563.4,RNA5SP120,AC007563.3,FABP5P14,MREG,TMEM169,AC098820.2,AC098820.3,AC098820.4,RPL37A,AC073321.3,IGFBP2,IGFBP5,PECR,4-Mar,AC069155.1,SMARCAL1,AC007563.5,XRCC5
2	118288695	119143344	Gain	0.0496022	AC009404.2,AC009303.3,RP11-98C1.1,RP11-98C1.2,RN7SL111P,AC009312.1,DDX18,AC009303.1,INSIG2,AC093901.1,HTR5BP,CCDC93
5	135514217	136350717	Gain	0.0413305	TRPC7-AS1,HSPD1P18,HNRNPA1P13,CTB-1I21.2,RNA5SP193,SMAD5,TRPC7-AS2,RP11-114H21.2,CTB-1I21.1,AC009014.3,TRPC7,SPOCK1
3	130135440	130970621	Gain	0.0040814	RN7SKP212,GSTO3P,Y_RNA,RP11-39E3.4,RP11-39E3.5,RNU6-726P,AC121332.1,AC083908.1,RP11-39E3.3,ASTE1,RP11-265F19.1,COL6A5,COL6A6,PIK3R4,ATP2C1,NEK11
3	148742939	149568747	Gain	0.0013101	Y_RNA,MED28P2,RP11-2G17.1,TM4SF1-AS1,RP11-278L15.2,RP11-167H9.1,RP11-278L15.3,RP11-278L15.4,RP11-278L15.6,RNU6-1098P,WWTR1-IT1,WWTR1-AS1,COMMD2,RNU6-507P,GYG1,HLTF-AS1,HPS3,CPHL1P,TM4SF18,TM4SF1,TM4SF4,HLTF,RP11-206M11.7,WWTR1,ANKUB1,RNF13,CP
2	116529288	117351115	Gain	0.0496022	DPP10
2	224847341	225669004	Gain	0.0314804	AC019109.1,AC104802.1,AC008072.1,AC073052.1,SERPINE2,FAM124B,DOCK10,CUL3
2	206785753	207603473	Gain	0.038105	AC007679.1,Vault,Y_RNA,AC007679.4,AC007383.3,AC007383.4,GCSHP3,EEF1B2,SNORD51,SNORA41,RN7SKP200,AC007383.6,HMGN1P6,RN7SKP260,AC017081.1,AC017081.2,HNRNPA1P51,AC010731.2,AC010731.3,AC010731.4,AC010731.6,Y_RNA,AC007679.3,INO80D,NDUFS1,GPR1,ZDBF2,DYTN,ADAM23,MDH1B
2	96895632	97712441	Gain	0.0314804	CIAO1,RP11-363D14.1,MIR3127,RP11-353K11.1,RNA5SP101,snoU13,AC079395.1,TRIM43CP,AC018892.8,AC018892.3,IGKV2OR2-1,STARD7-AS1,TMEM127,SNRNP200,AC021188.4,NCAPH,NEURL3,ARID5A,KANSL3,FER1L5,CNNM4,CNNM3,SEMA4C,ITPRIPL1,LMAN2L,FAM178B,ANKRD23,ANKRD39
11	8237946	9044767	Loss	0.047587	SCARNA20,RP11-152H18.4,SNORA3,SNORA45,RNA5SP330,Y_RNA,AKIP1,Y_RNA,RPL27A,RP11-152H18.3,RP11-318C2.1,C11orf16,ASCL3,TMEM9B,TMEM9B-AS1,NRIP3,LMO1,STK33,TRIM66,ST5,RP11-467K18.2,SCUBE2
11	6610170	7399249	Loss	0.0295474	RP11-732A19.8,ILK,TAF10,RP11-732A19.2,RP11-732A19.9,RP11-732A19.5,MRPL17,RP11-732A19.1,GVINP2,OR2AG2,OR2AG1,OR6A2,OR10A5,OR10A2,OR10A4,OR2D2,OR2D3,RP11-324J3.1,MIR302E,RRP8,TPP1,DCHS1,RP11-732A19.6,GVINP1,RP11-560B16.5,ZNF215,ZNF214,RBMXL2,DNHD1,NLRP14,SYT9
3	129313490	130126549	Gain	0.0040814	RP11-263I1.1,Y_RNA,RNU6-1142P,AC083799.1,RP11-93K22.1,RP11-93K22.7,OR7E129P,AC083906.1,OR7E21P,RP11-77P16.3,AC083906.2,RP11-77P16.4,ENPP7P3,AC130888.1,RP11-93K22.14,RP11-77P16.1,AC093004.1,PLXND1,RP11-93K22.6,TRH,ALG1L2,RP11-93K22.13,FAM86HP,COL6A4P2,TMCC1,TMCC1-AS1,COL6A5
9	135074450	135880468	Gain	0.018092	AL159997.1,RNU5D-2P,RP11-295G24.5,RNU6-357P,MIR548AW,RP11-415H23.4,RNU7-21P,NTNG2,SETX,BARHL1,GTF3C4,C9orf9,GFI1B,RP11-295G24.4,C9orf171,DDX31,AK8,TSC1,TTF1
5	133432862	134235317	Gain	0.0413305	MIR3661,CTD-2410N18.1,RP11-215P8.3,RNU6-456P,AC005355.2,RN7SL541P,RNU6-1311P,RNU6-1164P,RNU6-757P,CTB-2L9.1,AC006077.4,TCF7,SKP1,CTD-2410N18.5,PPP2CA,UBE2B,CDKN2AIPNL,RP11-215P8.1,RP11-215P8.4,JADE2,SEC24A,DDX46,C5orf24,CDKL3,CTD-2410N18.4,CTD-2410N18.3,AC005355.1,SAR1B,CAMLG,TXNDC15
1	208272037	209073906	Gain	0.00616225	RP11-2P2.1,RP11-565N2.2,RPS26P13,RP11-459K23.2,RP11-565N2.1,PLXNA2
3	89505858	90307877	Gain	0.0234456	RP11-91A15.2,RP11-91A15.1,U3,RNU6-712P,PROSP,EPHA3
11	112499832	113278482	Loss	0.000708023	RP11-27G22.1,RP11-629G13.1,RNU7-187P,NCAM1-AS1,RP11-159N11.4,RP11-839D17.3,ANKK1,RP11-159N11.3,NCAM1,TTC12
8	21959029	22731236	Loss	0.0323419	AC091171.1,NUDT18,REEP4,LGI3,AC105206.1,MIR320A,POLR3D,CTD-2036J7.1,RNU6-336P,RP11-382J24.2,RP11-582J16.4,RP11-582J16.3,AC037459.4,C8orf58,RP11-582J16.5,CTD-3247F14.2,EGR3,FAM160B2,HR,BMP1,PHYHIP,CTD-2530N21.4,PPP3CC,PDLIM2,CCAR2,BIN3,RP11-459E5.1,PIWIL2,SLC39A14,SORBS3,PEBP4,SFTPC
11	39073906	39840037	Loss	0.0208064	RP11-313M3.1,RNU6-99P,AC027806.1
1	240878202	241662139	Gain	0.00744067	RP11-80B9.4,RP11-80B9.1,PRKRIRP8,RFKP1,HNRNPA1P42,RP11-435F13.2,MIR3123,RP11-306K13.1,RP11-527D7.1,FH,RGS7
2	100456601	101241593	Gain	0.049089	AC092667.2,AC012493.2,RP11-292K15.1,AC012493.1,AC068538.2,RN7SL611P,snoU13,HMGN2P22,RN7SL360P,AC068538.4,LINC01104,CHST10,NMS,LONRF2,PDCL3,AFF3
2	169753647	170548742	Gain	0.0314804	G6PC2,AC007556.3,UBE2V1P6,AC093899.3,AC016772.4,DHRS9,BBS5,RP11-724O16.1,KLHL41,PPIG,SPC25,LRP2,FASTKD1,CCDC173,ABCB11
13	55084386	55880522	Gain	0.00685872	AL512655.1,MIR5007
13	113379930	114175269	Gain	0.0428052	ATP11A-AS1,AL356740.1,RP11-120K24.3,RP11-120K24.4,RP11-120K24.5,AL137002.1,F10-AS1,KARSP2,RP11-98F14.11,LDHBP1,GRTP1-AS1,DCUN1D2-AS,RNU1-16P,MCF2L-AS1,F10,PROZ,PCID2,LAMP1,GRTP1,ADPRHL1,DCUN1D2,ATP11A,MCF2L,F7,CUL4A,TMCO3
11	131935275	132700778	Loss	0.00022433	NTM-IT,RNU6-1182P,NTM,OPCML
2	138280458	139069834	Gain	0.049089	Y_RNA,AC069394.1,AC097523.1,YWHAEP5,AC097523.3,HNMT,AC020601.1,THSD7B
2	131633363	132429634	Gain	0.0496022	SCARNA4,NEK2P4,AC009477.7,NF1P8,MED15P8,RNU6-127P,CYP4F31P,KLF2P4,AC073869.2,AC073869.13,MTND6P10,MTND5P23,MTND4P21,AC073869.10,MTATP6P4,AC073869.8,AC073869.7,MTND2P18,MTND1P26,MED15P3,LINC01120,GNAQP1,AC073869.20,RP11-109E12.1,MIR4784,CCDC74A,MED15P4,RNU6-617P,GRAMD4P8,FAM168B,FAR2P4,ARHGAP42P1,RHOQP2,MZT2A,TUBA3D,LINC01087,ARHGEF4,PLEKHB2,POTEE,AC131180.1,AC093838.4,POTEKP,AC073869.1
2	121703624	122479138	Gain	0.0496022	AC016764.1,Y_RNA,AC067960.1,AC079988.3,AC013399.3,RNU4ATAC,Y_RNA,RPL12P15,snoU13,NPM1P32,TFCP2L1,CLASP1,RP11-204L24.2,NIFK-AS1,GLI2
13	64254857	65034144	Gain	0.00684491	OR7E156P,AL445989.1,RNU6-81P,PPP1R2P10,OR7E104P,RP11-394A14.4,NFYAP1,LINC00395,RP11-473M10.3,RP11-394A14.2,LINC00355
2	113454513	114236564	Gain	0.0496022	AC079753.1,AC079753.4,AC079753.5,HMGN2P23,AC016724.6,IL36A,IL1F10,RNU6-1180P,AC016683.5,RP11-65I12.1,IGKV1OR2-108,AC016745.3,RP11-480C16.1,AC016745.1,NT5DC4,IL1A,IL1B,IL37,IL36G,IL36B,IL36RN,IL1RN,PSD4,CBWD2,CKAP2L,PAX8-AS1,PAX8
2	216064151	216838931	Gain	0.0198618	AC073284.4,snoU13,AC012462.2,AC012462.3,AC012668.3,AC093850.2,AC093850.1,AC122136.2,AC122136.1,AC093382.1,ATIC,AC012462.1,MREG,FN1,AC012668.1,AC012668.2,LINC00607
2	215277797	216056176	Gain	0.0198618	ENSAP3,AC016708.2,VWC2L-IT1,SNORA70,AC072062.3,AC107218.3,VWC2L,BARD1,AC072062.1,ABCA12
9	820499	1602692	Gain	0.038105	RNU6-1073P,RP11-147I11.1,DMRT2,RP11-341G2.3,RPS27AP14,RP11-459D20.1,RNA5SP279,DMRT3,DMRT1
13	36687733	37462040	Gain	0.0306693	RNU6-71P,AL139377.1,HIST1H2APS6,AL136160.1,GAPDHP34,TCEAL4P1,ARL2BPP3,NDE1P2,RFXAP,SMAD9-AS1,SPG20,SPG20OS,CCNA1,SERTM1,SOHLH2,CCDC169-SOHLH2,CCDC169,SMAD9,DCLK1
9	106354994	107122544	Gain	0.00122455	RNA5SP291,RP11-82L2.1,RP11-217O12.1,SMC2,RP11-86L19.2
11	5540466	6304174	Loss	0.0295474	AC087380.14,OR52V1P,OR52H1,OR52H2P,OR52B5P,OR52T1P,HNRNPA1P53,OR52B6,OR52U1P,OR52P1P,OR56B1,OR52N4,OR56B2P,OR52N5,OR52N1,OR52N3P,OR52N2,OR52E6,OR52E8,OR52E7P,OR52E4,OR56A3,RP11-451K18.7,OR52L1,KRT18P58,OR56A4,RNA5SP329,OR56A1,OR56A7P,OR52L2P,OR52X1P,OR56B4,OR56B3P,OR52B1P,OR52B2,OR52W1,RP11-290F24.6,C11orf42,TRIM6,TRIM34,TRIM22,AC025016.1,FAM160A2,CNGA4,HBG2,AC015691.13,TRIM6-TRIM34,TRIM5,RP11-29…
3	76895843	77665582	Gain	0.0415716	RNU6-386P,VDAC1P7,ROBO2
3	120821970	121585631	Gain	0.0208064	RP11-10G15.4,RPL7AP11,snoU13,RN7SL172P,RNU4-62P,ARGFX,FBXO40,GOLGB1,EAF2,STXBP5L,POLQ,HCLS1,IQCB1
9	111718064	112484135	Gain	0.0040814	RNA5-8SP3,Y_RNA,MIR32,RNU6-984P,AL358815.1,MTND2P11,Y_RNA,MIR3927,CTNNAL1,FRRS1L,YBX1P6,TMEM245,EPB41L4B,PALM2,PTPN3
9	99242093	100005127	Gain	0.0040814	AAED1,RP11-535M15.2,RP11-330M2.4,RP11-330M2.3,YRDCP2,TCEA1P1,VN1R51P,FAM220CP,RNU6-798P,ZNF322P1,RP11-498P14.4,RP11-535M15.1,ZNF510,NUTM2G,CTSV,RP11-520B13.4,ANKRD18CP,RP11-498P14.3,RP11-498P14.5,HABP4,CDC14B,HIATL2,RP11-23J9.5,CCDC180,RP11-23J9.4,RP11-23J9.6,ZNF782
1	167526824	168290644	Gain	0.0207575	RP3-455J7.3,RP3-455J7.4,RP1-313L4.4,RP1-313L4.3,MIR1255B2,GCSHP5,RPL34P1,RP1-69E11.3,ANKRD36BP1,RNU6-1310P,MPZL1,ADCY10,GPR161,SFT2D2,TBX19,RCSD1,MPC2,DCAF6,TIPRL
11	113904604	114658456	Loss	0.000708023	AP000908.1,C11orf71,RP11-212D19.5,NXPE2P1,RP11-172C16.5,snoU13,RP11-172C16.4,RP11-64D24.4,RBM7,REXO2,NXPE4,ZBTB16,RP11-64D24.2,NNMT,NXPE1,NXPE2,RP11-212D19.4
5	139820850	140569690	Gain	0.0413305	SNORD45,EIF4EBP3,SLC35A4,SNORA27,HAUS1P1,RP11-515C16.1,CD14,NDUFA2,TMCO6,MIR3655,HARS2,VTRNA1-1,VTRNA1-2,VTRNA1-3,RP11-515C16.7,AC005609.2,AC005609.1,PCDHA14,PCDHB1,AC005754.7,PCDHB3,AC005754.8,PCDHB4,PCDHB5,PCDHB6,PCDHB17,PCDHB7,PCDHB16,PCDHB9,SRA1,APBB3,IK,WDR55,DND1,HARS,ZMAT2,PCDHB2,PCDHB8,ANKHD1,ANKHD1-EIF4EBP3,PCDHA1,PCDHA2,PCDHA3,PCDHA4,PCDHA5,PCDHA6,PCDHA7,PCDHA8,PCDHA9,PCDHA10,PCDHA11,PC…
2	145931407	146682046	Gain	0.049089	snR65,RPL6P5,AC079163.1,AC079248.1,AC064865.1,AC092484.1,AC062031.1,TEX41
2	105391647	106146374	Gain	0.0496022	POU3F3,AC018730.4,LINC01159,AC010884.2,AC104655.2,AC104655.3,GPR45,RP11-332H14.1,AC012360.1,AC012360.2,AC012360.4,RP11-332H14.2,LINC01158,MRPS9,C2orf49,AC012360.6,RP11-13J10.1,AC010884.1,FHL2,TGFBRAP1
2	160983346	161739776	Gain	0.00961489	RMRPP3,MIR4785,RN7SL423P,ITGB6,RBMS1
5	138946542	139705048	Gain	0.0413305	CTD-3224K15.3,CTD-3224K15.2,RNU6-236P,CTB-35F21.2,CTB-35F21.3,CTB-35F21.5,Y_RNA,IGIP,CTB-131B5.2,CXXC5,CTB-35F21.4,PURA,CTB-131B5.5,AC011379.1,PFDN1,UBE2D2,CTB-35F21.1,PSD2,NRG2,CYSTM1,LINC01024
13	89344377	90092386	Gain	0.0150632	GRPEL2P1,TRIM60P13,LINC01047,LINC00440,SP3P
1	157767308	158511809	Gain	0.0310969	MRPS21P2,KIRREL-IT1,ELL2P1,CD1D,RP11-404O13.4,CD1A,CD1C,CD1B,CD1E,OR10T2,OR10K2,OR10T1P,EI24P2,OR10K1,OR10R2,OR10R3P,OR10R1P,RP11-144L1.8,FCRL1,RP11-451O13.1,KIRREL,RP11-404O13.1,RP11-404O13.5,HMGN1P5,RP11-144L1.4,CD5L
13	88595858	89340429	Gain	0.0150632	AL354896.1,RPL29P29,LINC00560,LINC00433,RP11-545P6.2
9	80679757	81420082	Gain	0.0295474	RP11-336N8.1,RN7SKP59,RP11-336N8.2,RP11-336N8.3,RP11-336N8.4,RP11-216F5.1,MTND2P8,PSAT1,CEP78
2	188840221	189583595	Gain	0.0123434	AC104131.1,RNA5SP114,MIR561,GULP1,AC079613.1,LINC01090
20	45623207	46361758	Gain	0.000145464	GAPDHP54,RP5-1050K3.3,RP5-890O15.3,MIR3616,RN7SL243P,AL031666.1,AL031666.2,RP4-569M23.4,RP4-569M23.2,RPL35AP,RNU6-497P,RNU6-563P,AL021394.1,RP5-1049G16.4,CTD-2653D5.1,RP1-148H17.1,EYA2,ZMYND8,SULF2,NCOA3
1	154081059	154810683	Gain	0.0310969	RN7SL431P,MIR190B,AL590431.1,SNORA58,HAX1,SNORD59,RNU6-239P,RNU6-121P,AQP10,RNU7-57P,RP11-350G8.4,RP11-350G8.3,RP11-350G8.5,RP11-350G8.7,RP11-350G8.9,UBE2Q1,UBE2Q1-AS1,RP11-61L14.6,AL606500.1,C1orf189,C1orf43,UBAP2L,ATP8B2,SHE,TDRD10,CHRNB2,ADAR,NUP210L,IL6R,KCNN3,TPM3
3	172898728	173632870	Gain	0.0013101	RP11-521A24.1,NLGN1-AS1,NLGN1,RP11-324C10.1
2	144125766	144857277	Gain	0.049089	CTD-2252P21.1,Y_RNA,AC092652.1,ARHGAP15,AC096558.1,RP11-570L15.2,RP11-570L15.1,RP11-434H14.1,AC079584.2,AC016910.1,GTDC1
2	180209367	180940700	Gain	0.0123434	AC068042.1,AC092642.1,MIR1258,SNORA43,CWC22,ZNF385B
9	136865612	137596452	Gain	0.0392257	LINC00094,RP11-349K21.1,LL09NC01-251B2.3,RNU6ATAC,LL09NC01-139C3.1,RP11-145E17.2,MIR4669,BRD3,RP11-374P20.4,WDR5,RP11-473E2.2,RP11-473E2.4,RP11-473E2.3,COL5A1-AS1,RXRA,COL5A1
11	30082641	30832691	Loss	0.047587	RP4-562D20.2,FSHB,RP4-710M3.1,RP4-710M3.2,RP11-624D11.2,ARL14EP,RP5-1024C24.1,MPPED2
1	215968463	216696488	Gain	0.00744067	RP5-1099E6.3,MRPS18BP1,RP5-1111A8.3,RP11-22M7.2,USH2A,ESRRG
2	220567411	221289655	Gain	0.0198618	AC008281.1,MIR4268,AC009310.1,AC114765.3,AC114765.2,AC009502.4,AC114765.1
1	186574022	187292608	Gain	0.0207575	RP5-973M2.2,PLA2G4A,LINC01036,PTGS2
2	211711929	212426137	Gain	0.0198618	RP11-212J19.1,AC013404.1,RNA5SP119,ERBB4
7	24311686	25014790	Gain	0.0218635	RNU6-1103P,SUMO2P14,CTA-298G8.2,AC004016.1,AC004016.2,NPY,MPP6,DFNA5,OSBPL3
11	66066994	66804748	Loss	0.00011479	RP11-867G23.13,CD248,RIN1,RP11-867G23.12,B3GNT1,SLC29A2,RP11-867G23.9,RNU1-84P,RP11-867G23.10,SNORA43,CTD-3074O7.7,CTD-3074O7.5,CTD-3074O7.12,CTD-3074O7.2,CTSF,CCDC87,RNU4-39P,RP11-658F2.8,RN7SL12P,RP11-658F2.3,FTLP6,RCE1,LRFN4,RNU7-23P,MIR3163,C11orf86,U3,BRMS1,RP11-867G23.8,MRPL11,PELI3,DPP3,CTD-3074O7.11,BBS1,ZDHHC24,CCS,RBM14,RBM4,RBM14-RBM4,RBM4B,SYT12,NPAS4,ACTN3,SPTBN2,C11orf80,PC
3	156733091	157437010	Gain	0.0013101	RN7SKP177,RP11-6F2.5,Y_RNA,KRT18P34,RP11-555M1.3,RNA5SP146,RP11-550I24.3,LINC00880,LINC00881,CCNL1,LEKR1,RP11-550I24.2,VEPH1,PTX3,C3orf55
3	160209896	160925208	Gain	0.0013101	SCARNA7,RPL6P8,ARL14,SNORA72,RP11-16N11.2,KPNA4,KRT8P12,B3GALNT1,PPM1L,NMD3
2	98495053	99202747	Gain	0.049089	RNU7-96P,ATP5BP1,AC092675.1,AC092675.4,CNGA3,VWA3B,AC092675.3,INPP4A,TMEM131
2	157599186	158315629	Gain	0.0155531	RPLP0P7,AC108057.1,AC016732.2,RN7SKP281,ERMN,AC019201.1,GALNT5,FAM133DP,CYTIP
3	134987361	135698621	Gain	0.0023226	U8,RP11-237P21.1,AC092989.1,RP11-305O4.1,RP11-657O9.1,PPP2R3A
9	105642463	106347911	Gain	0.00122455	RP11-338N12.1,RP11-341A22.1,CYLC2,RP11-436F21.1,RP11-341A22.2
3	88348461	89066062	Gain	0.0234456	ABCF2P1,Y_RNA,NDUFA5P5,NARG2P2
13	66429052	67140466	Gain	0.0102245	AL354775.1,LINC01052,MIR548X2,MIR4704,TRIM60P19,PCDH9-AS1,PCDH9
2	82727009	83423902	Gain	0.049089	AC109638.1,MTND4P25,MTND5P27,MTND6P7,AC098817.3,AC098817.5,AC010105.1
3	136781712	137481509	Gain	0.00653884	RNA5SP142,RP11-575C1.1,NPM1P17
3	137488632	138177329	Gain	0.00653884	HSPA8P9,KRT8P36,A4GNT,RP11-2A4.4,CLDN18,RP11-461M2.2,DZIP1L,ARMC8,MRAS,ESYT3,RP11-2A4.3,DBR1,NME9
18	29055093	29783491	Loss	0.00744782	RP11-650P15.1,TTR,RNU6-1002P,RP11-549B18.1,RN7SKP44,LRRC37A7P,RP11-549B18.3,SLC25A52,RP11-210K20.2,RP11-210K20.3,RP11-210K20.4,RNU6-1050P,PGDP1,RP11-326K13.2,AC009831.1,RP11-53I6.1,snoU13,RNA5SP453,RP11-53I6.5,DSG3,RP11-75N4.2,RP11-326K13.4,RP11-53I6.3,RNF138,RP11-53I6.4,MEP1B,DSG2,B4GALT6,TRAPPC8,RNF125,RP11-53I6.2,GAREM
3	167626221	168308448	Gain	0.0023226	RP11-603B13.1,HMGN2P26,AC069243.1,RP11-637O11.2,RNU2-20P,MIR551B,RP11-298O21.5,EGFEM1P,GOLIM4
3	175078481	175759769	Gain	0.0013101	MIR4789,RNU6-1233P,RNU4-91P,RP11-744O11.2,UBE2V1P2,snoU13,RNU6-1317P,NAALADL2-AS1,RP11-523G9.3,RP11-809F4.3,RP11-809F4.2,NAALADL2
9	81994252	82666737	Gain	0.0295474	CHCHD2P9,RP11-79D8.2,RP11-403N16.5,NPAP1P6,RP11-403N16.3,RP11-394O9.1,RP11-375O18.2,RP11-403N16.2,TLE4
9	138707728	139381924	Gain	0.0392257	RP11-83N9.5,C9orf69,LHX3,WI2-1959D15.1,DKFZP434A062,DNLZ,CAMSAP1,UBAC1,QSOX2,GPSM1,CARD9,SNAPC4,SDCCAG3,PMPCA,SEC16A,C9orf163,RP11-432J22.2,NACC2,INPP5E
20	57295129	57966611	Gain	0.000346926	RP4-806M20.5,MIR296,MIR298,RP1-309F20.4,TUBB1,SLMO2,MRPS16P2,AL035250.1,RP4-614C15.2,RP4-614C15.3,PIEZO1P2,GNAS,RP1-309F20.3,NELFCD,CTSZ,ATP5E,EDN3,GNAS-AS1,RP4-806M20.3,ZNF831
1	179081450	179748514	Gain	0.0207575	RP11-345I18.1,SETP10,SNORA67,SNORA67,EIF4A1P11,RP11-345I18.4,COX5BP8,RP11-345I18.6,RN7SL374P,MEF2AP1,RP11-545A16.1,RNU5F-2P,RP11-545A16.3,RP11-545A16.4,AL359853.1,HNRNPA1P54,AL160286.1,NPHS2,FAM163A,ABL2,AXDND1,TDRD5,RP11-12M5.1,SOAT1
3	189232616	189896767	Gain	0.000732976	RP11-600G3.1,MIR944,MTAPP2,RN7SL486P,AC067718.1,RNU6-1109P,NMNAT1P3,LEPREL1-AS1,TP63,LEPREL1
9	131397479	132058298	Gain	0.018092	VTI1BP4,HMGA1P4,RN7SL560P,ZDHHC12,RP11-545E17.3,snoU13,ENDOG,C9orf114,DOLK,RP11-167N5.5,DOLPP1,RP11-247A12.1,AL158151.2,RP11-247A12.7,RP11-247A12.8,AL158151.1,RP11-344B5.4,RP11-344B5.2,WDR34,SET,ZER1,TBC1D13,LRRC8A,PHYHD1,RP11-101E3.5,SH3GLB2,FAM73B,PPP2R4,IER5L,RP11-247A12.2,RP11-344B5.3,PKN3,CCBL1,NUP188,CRAT
9	110237855	110904736	Gain	0.0040814	RP11-438P9.2,RNU6-996P,AL162389.1,RNU6-1064P,RN7SL659P,RPL36AP6,RP11-380I20.2,RNA5SP293,RPS15AP27,RP11-240E2.2,CHCHD4P2,KLF4,RP11-438P9.1
9	91013219	91658946	Gain	0.018092	HNRNPA1P14,RP11-317B17.3,MIR4289,PCNPP2,C9orf47,RP11-82L18.4,SPIN1,NXNL2,RP13-60M5.2,RP11-791O21.5,S1PR3,SHC3
1	220113201	220762523	Gain	0.00744067	U3,snoU13,MIR215,MIR194-1,snoU13,RPS15AP12,SNORA36B,RP11-568G11.5,MORF4L1P1,AURKAPS1,XRCC6P3,RP11-302I18.1,RP11-302I18.3,RP11-410C4.5,AC096644.1,RP11-410C4.1,RP11-410C4.2,SLMO2P1,RN7SL464P,BPNT1,IARS2,RP11-568G11.4,RP11-410C4.4,SLC30A10,RAB3GAP2,MARK1,EPRS
2	120247912	120891075	Gain	0.0496022	AC013275.1,AC069154.4,snoU13,AC016691.2,SCTR,TMEM177,PCDP1,EPB41L5,PTPN4
3	190702924	191360970	Gain	0.000732976	PYDC2,Y_RNA,Y_RNA,OSTN-AS1,UTS2B,RP11-197K6.1,OSTN,CCDC50
3	159556112	160208548	Gain	0.0013101	BRD7P2,C3orf80,RP11-431I8.1,RP11-432B6.1,MIR15B,MIR16-2,RP11-227J5.3,RNU7-136P,SCHIP1,IL12A,LINC01100,SMC4,IL12A-AS1,RP11-432B6.3,IFT80,TRIM59,IQCJ-SCHIP1
1	165617973	166262027	Gain	0.0310969	Y_RNA,RP11-466F5.3,RP11-466F5.4,RP11-466F5.10,RP11-466F5.9,RP11-525G13.2,RP11-7G12.2,RP11-7G12.1,RNA5SP64,AL626787.1,MIR921,RP11-9L18.2,MGST3,ALDH9A1,TMCO1,RP11-466F5.8,RP11-375H19.2,RP11-9L18.3,UCK2,FAM78B,RP11-466F5.6
13	62646732	63288936	Gain	0.0102245	LINC01074,RPL32P28,SQSTM1P1,LINC01075,LINC00459,LINC00448
11	89407981	90113344	Loss	0.000708023	RP11-313I2.2,TRIM77,RP11-313I2.13,RP11-313I2.5,UBTFL2,RP11-313I2.11,RP11-313I2.6,RP11-313I2.10,TRIM64DP,RP11-358N4.3,RP11-358N4.5,TRIM53BP,RP11-81M19.3,RP11-313I2.8,AP000648.3,RP11-81M19.1,MTND1P35,TRIM49D2P,RP11-529A4.4,RP11-529A4.15,RP11-529A4.5,RP11-529A4.7,TRIM53AP,RP11-529A4.9,RP11-529A4.12,TRIM64EP,RP11-529A4.10,RP11-716D19.1,UBTFL1,AP000648.6,SNORD56,RP11-121L10.3,AP002364.1,TRIM49,RP11-35…
9	37676900	38319792	Gain	0.038105	RP11-3J10.7,PAICSP1,RP11-3J10.4,RNU7-124P,U8,snoU13,FRMPD1,TRMT10B,EXOSC3,DCAF10,SLC25A51,SHB,RP11-613M10.9
17	61624550	62279138	Gain	0.0298204	RNU6-288P,TACO1,RP11-51F16.9,RP11-51F16.5,LIMD2,PSMC5,RN7SL805P,CSH2,GH2,RP11-630H24.3,CSH1,RP11-630H24.4,CSHL1,GH1,CD79B,RP11-214C8.2,SNORA76,SNORD104,DCAF7,STRADA,RP11-51F16.8,CCDC47,FTSJ3,SMARCD2,TCAM1P,SCN4A,CTC-264K15.6,C17orf72,ICAM2,KCNH6,MAP3K3,ERN1,TEX2,DDX42
11	123229855	123939460	Loss	0.00127277	MIR4493,LINC01059,RP11-634B22.4,AP000868.1,OR6X1,RNU1-21P,OR6M1,OR6M2P,OR6M3P,TMEM225,OR8D4,OR4D5,OR10S1,OR10G6,OR10G5P,OR10G4,OR10G9,OR10G8,OR10G7,OR10D5P,AP000783.1,SCN3B,OR6T1,GRAMD1B,SF3A3P2,ZNF202
9	72896848	73544829	Gain	0.047587	Y_RNA,Metazoa_SRP,RP11-141J10.1,RP11-141J10.2,MIR204,PIGUP1,SMC5,KLF9,TRPM3
18	57150992	57859562	Loss	0.000555643	RP11-760L24.1,RP11-2N1.1,RP11-2N1.2,AC098847.1,RPS26P54,GLUD1P4,PMAIP1,RP11-866E20.1,NFE2L3P1,RN7SL342P,SDCCAG3P1,RP11-866E20.3,FAM60CP,RNU6-567P,RPS3AP49,RNU4-17P,RP11-824M15.3,CCBE1,RP11-795H16.3
5	140575600	141211946	Gain	0.0413305	PCDHB11,PCDHB13,PCDHB14,PCDHB18,PCDHB19P,PCDHB15,SLC25A2,TAF7,AC005618.1,PCDHGB8P,RN7SL68P,CTD-2024I7.13,CTD-2024I7.1,FCHSD1,PCDHB12,AC005618.6,PCDHGA8,PCDHGA9,PCDHGB6,PCDHGA10,PCDHGB7,PCDHGA11,PCDHGA12,PCDHGC3,PCDHGC4,PCDHGC5,AC008781.7,HDAC3,RELL2,PCDHGA1,PCDHGA2,PCDHGA3,PCDHGB1,PCDHGA4,PCDHGB2,PCDHGA5,PCDHGB3,PCDHGA6,PCDHGA7,PCDHGB4,DIAPH1,ARAP3
2	147262168	147900546	Gain	0.049089	PABPC1P2,RP11-638D14.1,AC103881.1,AC062032.1
2	152466325	153099607	Gain	0.0155531	RPL30P2,ARL5A,STAM2,NEB,CACNB4,AC079790.2
13	52721067	53353041	Gain	0.00684222	RP13-444H2.1,RNY4P24,LINC00345,NEK3,MRPS31P5,VPS36,CKAP2,RP11-78J21.4,MRPS31P4,SUGT1,LECT1,RP11-248G5.8,TPTE2P2,THSD1,TPTE2P3,HNRNPA1L2
1	177145776	177766615	Gain	0.0207575	AL021398.1,AL122019.1,RP11-63B19.1,RP1-35C21.1,RP1-35C21.2,BRINP2
9	97809581	98439239	Gain	0.0109391	MIR23B,MIR27B,MIR3074,RP11-80I15.4,RP11-80I15.1,RNA5SP288,snoU13,RP11-173G21.1,RP11-435O5.7,MT1P1,RP11-435O5.2,RP11-435O5.6,RP11-435O5.5,RP11-435O5.4,RP11-332M4.1,RP11-180I4.1,PTCH1,FANCC,RP11-180I4.2,C9orf3
2	144989493	145619972	Gain	0.049089	AC009951.2,AC009951.1,AC023128.1,AC023128.2,ZEB2-AS1,AC010090.1,ZEB2,GTDC1,TEX41
1	213672886	214301281	Gain	0.00744067	AL592063.1,RP11-53A1.2,RP11-554K11.2,PROX1-AS1,PROX1,RP11-323I1.1
9	132167953	132785905	Gain	0.018092	RP11-65J3.2,AL353803.1,RP11-65J3.14,RP11-492E3.2,AL391056.1,ASB6,RP11-483H20.4,RP11-483H20.6,AL590369.1,UBE2V1P4,TOR1B,RP11-409K20.7,RP11-409K20.6,RP11-65J3.3,RP11-492E3.51,PRRX2,TOR1A,C9orf78,USP20,LINC00963,NTMT1,C9orf50,PTGES,FNBP1
2	191219274	191838204	Gain	0.0246357	RP11-647K16.1,RN7SKP179,AC005540.3,TMEM194B,AC093388.3,NAB1,AC006460.2,STAT1,INPP1,MFSD6,GLS
9	16226020	16847803	Gain	0.0314804	RP11-183I6.2,RP11-62F24.1,RP11-62F24.2,RP11-335H2.2,C9orf92,BNC2
3	166504047	167133798	Gain	0.0023226	CBX1P5,RP11-12K11.1,AC092965.1,RP11-440K22.1,RP11-12K11.2,ZBBX,RP11-576M8.2
2	181536660	182139107	Gain	0.0123434	FTH1P20,AC104076.2,AC104076.3,AC068196.1,AC009478.1,UBE2E3,AC104820.2
3	195143853	195746770	Gain	0.000732976	RNU6ATAC24P,AC091633.3,AC091633.2,AC090018.1,RP11-141C7.4,RP11-141C7.3,AC069513.4,MIR570,AC124944.4,TNK2-AS1,AC124944.3,RP11-352G9.1,RN7SL773P,RNU2-11P,AC024937.6,RP11-480A16.1,AC024937.4,PPP1R2,AC069213.1,SDHAP2,MUC20,MUC4,AC124944.5,TNK2,APOD,LINC00969,SDHAP1,ACAP2
9	103452328	104049635	Gain	0.0040814	RP11-394D2.1,RP11-62L10.1,GAPDHP26,RP11-70K10.2,LPPR1
9	118642943	119246424	Gain	0.0109391	RP11-787B4.2,AL353141.1,PAPPA-AS2,AL137024.1,LINC00474,RP11-45A16.4,PAPPA-AS1,PAPPA,ASTN2
3	56813403	57421770	Gain	0.0325174	RP11-157F20.3,RP11-157F20.1,ARHGEF3-AS1,SPATA12,HESX1,ASB14,ARHGEF3,IL17RD,APPL1,DNAH12
2	170757405	171356309	Gain	0.0198618	RNU6-1006P,AC092641.2,AC012594.1,MYO3B,UBR3
5	130429577	131029682	Gain	0.0413305	HINT1,LYRM7,CDC42SE2,RAPGEF6,CTC-432M15.3,FNIP1
1	216966141	217567501	Gain	0.00744067	ESRRG
3	154628379	155241739	Gain	0.0013101	RP11-439C8.2,PABPC1P10,RP11-639F1.1,RP11-639F1.2,RP11-639F1.3,Metazoa_SRP,PLCH1-AS2,MME-AS1,RP11-451G4.1,RP11-451G4.2,RP11-451G4.3,PLCH1-AS1,MME,PLCH1
9	79668279	80266044	Gain	0.0295474	RP11-490H9.1,VPS13A-AS1,RP11-111E2.1,RNU6-1303P,VPS13A,GNA14,RP11-466A17.1
13	100583452	101178842	Gain	0.0430045	ZIC5,ZIC2,LINC00554,NDUFA12P1,ASNSP3,RPL15P18,RP11-340C20.3,PCCA-AS1,PCCA
2	193967438	194569722	Gain	0.0246357	AC092638.1,AC092638.2
13	101202788	101801932	Gain	0.0309077	COX5BP6,ARF4P3,LINC00411,RP11-151A6.4,GGACT,TMTC4,NALCN-AS1,NALCN
3	65699836	66298961	Gain	0.0415716	RPL17P17,AC106827.2,Y_RNA,MAGI1-AS1,AC106827.1,MAGI1,MAGI1-IT1,SLC25A26
13	77410263	78011344	Gain	0.00450528	KCTD12,AC000403.1,BTF3P11,RPL7P44,CLN5,MYCBP2-AS2,IRG1,DHX9P1,MYCBP2-AS1,MYCBP2,FBXL3
1	205609411	206198587	Gain	0.00744067	AC119673.1,SNORA72,RAB7L1,RP4-681L3.2,RP11-312O7.2,RP11-38J22.1,RP11-38J22.2,SLC45A3,NUCKS1,SLC41A1,PM20D1,SLC26A9,FAM72A
9	124076448	124664644	Gain	0.0109391	RN7SL187P,HMGB1P37,AL357936.1,RP11-244O19.1,AL161784.1,RP11-162D16.2,RP11-524G24.2,GSN,STOM,GGTA1P,DAB2IP,TTLL11-IT1,TTLL11
20	8085072	8679201	Gain	0.0178397	PLCB1-IT1,AL031655.1,AL031655.2,PLCB1
11	32571595	33248260	Loss	0.0349244	HNRNPA3P9,RP1-181J22.1,Y_RNA,PIGCP1,Y_RNA,RPL29P23,Y_RNA,EIF3M,PRRG4,QSER1,DEPDC7,TCP11L1,CSTF3-AS1,CCDC73,CSTF3
2	186297215	186889259	Gain	0.0123434	AC080125.1,U8,RPL21P32,AC007966.1,AC008174.3,FSIP2
1	163510212	164099169	Gain	0.0207575	RP4-640E24.1,U3
2	187643406	188230471	Gain	0.0123434	AC018735.1,RN7SKP42,RNU6-989P,AC007319.1,CALCRL,ZSWIM2
1	237411940	237999970	Gain	0.00189251	MIR4428,SNORA25,RYR2
1	183562889	184131753	Gain	0.0207575	RP1-127C7.6,APOBEC4,RP11-293B7.1,RP11-444D13.1,ARPC5,COLGALT2,RGL1,TSEN15,SMG7
3	141817744	142389384	Gain	0.0013101	RNU6-425P,RP11-485G4.2,RNU6-1294P,RNU1-100P,AC109992.1,RP11-383G6.4,RP11-383G6.3,RPL6P9,RNA5SP143,PLS1-AS1,GK5,TFDP2,XRN1,ATR,PLS1
1	165045555	165617920	Gain	0.0310969	RP11-38C18.2,RP11-38C18.3,RP11-541H12.1,RP11-306I1.1,LRRC52,RP11-306I1.2,MGST3,LMX1A,RXRG,RP11-280O1.2
1	242791788	243360467	Gain	0.00744067	RP11-435I3.1,RSL24D1P4,RP11-498M14.1,AL445675.1,RP11-331N16.1,RP11-261C10.1,RP11-261C10.7,RNU6-747P,RP11-261C10.4,RP11-261C10.2,RP11-261C10.3,RP11-261C10.5,CEP170
9	100978372	101562858	Gain	0.0040814	RP11-270F18.2,SEPT7P7,TBC1D2,ANKS6,GABBR2
2	97713774	98289838	Gain	0.049089	IGKV2OR2-2,IGKV1OR2-3,FAHD2B,RN7SL313P,IGKV1OR2-11,IGKV2OR2-10,IGKV2OR2-7,IGKV1OR2-6,IGKV3OR2-5,IGKV2OR2-7D,IGKV2OR2-8,IGKV1OR2-9,AC159540.3,AC159540.14,UBTFL6,COX5B,ACTR1B,RNU4-8P,AC018892.9,AC159540.1,AC159540.2,ANKRD36,ANKRD36B,LINC01125
2	155372611	155952669	Gain	0.0155531	RNA5SP107,AC061961.2,CBX3P6,AC092625.1,RNU6-1001P,KCNJ3
1	166579571	167156499	Gain	0.0207575	RPL4P2,CNN2P10,RNA5SP65,snoU13,RP11-102C16.3,RP11-277B15.1,FMO10P,FMO11P,POGK,TADA1,DUTP6,RP4-782G3.1,ILDR2,GPA33,DUSP27,RP11-277B15.2,FMO9P,MAEL
20	44798391	45368154	Gain	0.000297863	RP5-998H6.2,MKRN7P,ZNF840,RP1-28H20.3,SLC35C2,ELMO2,ZNF663P,ZNF334,OCSTAMP,TP53RK,CDH22,SLC13A3,SLC2A10
7	15172227	15743771	Gain	0.0102944	AC005550.5,RPL36AP26,MEOX2,AC005550.3,AGMO,AC005550.4
2	161748917	162331259	Gain	0.00961489	AC009299.4,AC009299.5,AC009299.1,5S_rRNA,TBR1,AC009487.4,AC009313.2,AC009299.2,AC009299.3,AC009487.5,AC009313.1,TANK,PSMD14,SLC4A10
1	224204936	224789448	Gain	0.0136602	AC138393.1,RP11-504P24.5,RN7SKP49,RP11-365O16.1,SNORA72,RP11-365O16.3,MIR320B2,RP11-365O16.5,RNU6-1008P,snoU13,MIR4742,AKR1B1P1,FBXO28,DEGS1,RP11-365O16.6,NVL,CNIH4,WDR26,CNIH3
1	244379433	244934551	Gain	0.00744067	TGIF2P1,AC099757.1,CYCSP5,RP11-173A6.2,C1orf100,RP11-518L10.5,ADSS,C1orf101,DESI2
3	56252604	56813142	Gain	0.0325174	FAM208A,ARHGEF3,ERC2,CCDC66
7	6606603	7154900	Gain	0.0218635	ZNF853,RP11-611L7.1,AC073343.1,AC073343.2,OR7E39P,OR7E136P,AC079804.2,OR7E59P,RP11-740N7.3,ALG1L5P,RP11-740N7.4,FAM86LP,AC079804.1,AC092104.2,MIR3683,AC092104.1,AC092104.3,AC092104.5,AC092104.4,RP11-397J20.1,Y_RNA,ZDHHC4,AC079742.4,C7orf26,AC073343.13,ZNF12,PMS2CL,CCZ1B,UNC93B2,ZNF316,RSPH10B2
7	23474325	24035127	Gain	0.0151315	RNU7-143P,AC079780.3,RPS2P32,Y_RNA,AC006026.9,FCF1P1,AC006026.12,AC006026.1,AC006026.13,PCMTD1P3,TPT1P7,AC009508.1,snoU13,TRA2A,AC006026.10,CCDC126,IGF2BP3,FAM221A,STK31
9	81440464	81992885	Gain	0.0295474	KRT18P24,RP11-165H23.1
2	136265353	136818718	Gain	0.0496022	AC064850.4,RNU6-512P,MIR128-1,Y_RNA,AC011893.3,AC011999.1,UBXN4,MCM6,AC093391.2,ZRANB3,LCT,DARS,R3HDM1
17	29710352	30266928	Gain	0.0279113	RN7SL79P,RN7SL45P,MIR4724,MIR193A,RNU6ATAC7P,MIR4725,MIR365B,RP11-805L22.1,RNU6-1134P,RP11-805L22.2,RP11-805L22.3,CTC-542B22.1,AC003101.1,RP1-41C23.1,COPRS,UTP6,CTC-542B22.2,RAB11FIP4,SUZ12
1	217595165	218142129	Gain	0.00744067	RP11-361K17.2,UBBP2,SPATA17-AS1,LINC00210,GPATCH2,SPATA17
7	21530104	22096915	Gain	0.0151315	CDCA7L,SP4,DNAH11
2	217704719	218257642	Gain	0.0198618	AC007557.4,TNP1,AC007557.2,AC007557.3,AC007563.1,AC007557.1,RP11-574O16.1,AC010887.1,RN7SKP43,AC009492.1,AC007563.5,DIRC3
17	33262383	33824902	Gain	0.0235086	ZNF830,RP5-837J1.2,snoU13,RP5-837J1.4,RP5-837J1.1,RNU6-840P,Vault,RP11-799D4.3,RP11-799D4.2,RP11-799D4.1,SLC35G3,RP11-799D4.4,RP11-47L3.1,RP11-686D22.2,RP11-686D22.6,RP11-686D22.5,RP11-686D22.4,RP11-686D22.7,RP11-1094M14.7,RP11-686D22.10,RP11-686D22.9,RP11-1094M14.9,LIG3,RFFL,RAD51D,FNDC8,NLE1,UNC45B,SLFN5,RP11-686D22.8,RP11-686D22.3,SLFN12,SLFN13,CCT6B,RAD51L3-RFFL,SLFN11,SLFN12L
9	112589454	113139029	Gain	0.0040814	RNU6-1039P,RP11-151F5.2,C9orf152,TXN,TXNDC8,PALM2,PALM2-AKAP2,AKAP2,SVEP1
13	32965730	33534282	Gain	0.0216153	SNORA16,RP11-298P3.4,ATP8A2P2,RNY1P4,TOMM22P3,N4BP2L1,LINC00423,BRCA2,N4BP2L2,PDS5B
1	153493801	154052275	Gain	0.0458959	BX470102.3,S100A6,S100A5,S100A3,S100A14,S100A1,RP1-178F15.4,ILF2,RN7SL372P,RP11-216N14.1,Y_RNA,RP11-216N14.8,RP11-216N14.9,snoU13,Y_RNA,RP11-216N14.5,RP11-216N14.7,RP11-759F5.1,SLC39A1,RP11-422P24.10,JTB,RP11-422P24.11,RAB13,RPS27,RP11-422P24.9,U3,RNU6-179P,RPS7P2,S100A4,S100A2,S100A16,S100A13,RP1-178F15.5,SNAPIN,NPR1,INTS3,DENND4B,CRTC2,CREB3L4,CHTOP,SLC27A3,GATAD2B,NUP210L
3	179010270	179577887	Gain	0.000732976	RP11-255C15.4,RP11-255C15.3,RP11-145M9.4,AC007620.3,RP11-145M9.5,RP11-145M9.2,MTHFD2P7,RP11-15L13.4,RP11-145M9.6,snoU13,AC090425.1,RP11-473P24.2,RP11-494H4.3,MFN1,GNB4,ACTL6A,NDUFB5,ZNF639,USP13,PEX5L,MRPL47
3	163159979	163726357	Gain	0.0013101	RP11-418B12.1,AC104637.1,AC092962.1,RP11-208P4.1
18	54776258	55424509	Loss	0.000328366	BOD1L2,AC090340.1,RNU6-742P,CTD-2526M8.3,CTD-2526M8.2,RNU6-737P,ST8SIA3,ONECUT2,FECH,NARS,RP11-35G9.3,RP11-35G9.5,ATP8B1
7	5636712	6201258	Gain	0.0151315	RN7SL556P,OCM,Y_RNA,SNORA42,ANKRD61,RN7SL851P,RNU6-218P,AC004895.1,RNF216-IT1,ZNF815P,CCZ1,RSPH10B,AIMP2,EIF2AK1,AC004895.4,FSCN1,RNF216,PMS2,USP42
7	2094341	2648886	Gain	0.0230702	NUDT1,RP5-1125K23.1,RP4-607J2.1,AC004840.9,GRIFIN,MIR4648,snoU13,FTSJ2,EIF3B,AC004840.8,CHST12,LFNG,BRAT1,SNX8,IQCE,MAD1L1
1	187690537	188241206	Gain	0.0207575	RP11-134C1.1,RN7SKP156,RP11-201A3.1,RP11-405P11.1
1	226327069	226880930	Gain	0.0207575	RP11-275I14.4,RP11-275I14.2,MIXL1,snoU13,snoU13,YBX1P9,RP11-118H4.3,RP11-118H4.1,RN7SKP165,CDKN2AIPNLP1,ITPKB-AS1,PARP1,ITPKB-IT1,ACBD3,C1orf95,ITPKB,LIN9
3	124357903	124903656	Gain	0.0122297	AC080008.1,RP11-71H17.7,MIR544B,RP11-71H17.1,RP11-71H17.9,ENO1P3,RNA5SP137,RNU6-230P,MIR5092,UMPS,ITGB5-AS1,HEG1,KALRN,ITGB5,MUC13,SLC12A8
11	116684768	117328100	Loss	0.00127277	APOA4,APOA1,SIK3-IT1,AP000936.2,RNY4P6,AP000936.1,AP000936.4,AP000936.5,RP11-109L13.1,RP11-109L13.5,TAGLN,SCARNA11,AP000892.8,APOC3,APOA1-AS,SIDT2,PCSK7,RNF214,CEP164,AP000892.4,SIK3,PAFAH1B2,BACE1,DSCAML1
18	5958902	6604604	Loss	0.00233746	RP11-793A3.1,RNU5F-3P,RN7SL723P,RNU6-349P,RPL6P27,CTD-2124B20.2,CTD-2124B20.3,RN7SL282P,RP11-760N9.1,RP11-793A3.2,C18orf64,L3MBTL4
9	1847506	2380734	Gain	0.038105	RP11-443B9.1,RP11-264I13.2,RNU2-25P,RN7SL592P,SMARCA2
5	170483193	171027070	Gain	0.0230953	RP11-546B8.3,snoU13,RP11-546B8.1,RN7SL339P,RP11-117L6.1,SNORA70,RP11-546B8.5,MIR3912,TLX3,NPM1,FGF18,RANBP17
9	113254651	113796976	Gain	0.0023226	RNU6-124P,RP11-410K21.2,RP13-461N9.2,RNU6-432P,Y_RNA,MUSK,LPAR1,SVEP1
3	186325802	186868324	Gain	0.000732976	RP11-795A2.2,PSMD10P2,RNU6-1105P,RP11-573D15.6,RP11-573D15.9,EIF4A2,SNORD2,SNORA63,SNORA81,SNORA63,SNORA4,RP11-573D15.1,ADIPOQ-AS1,RPS20P14,RP11-42D20.1,AC007690.1,AHSG,FETUB,RP11-134F2.2,RP11-795A2.3,RP11-573D15.8,KNG1,RP11-573D15.3,RP11-573D15.2,ADIPOQ,RPL39L,HRG,RFC4,ST6GAL1
1	221580870	222112397	Gain	0.00744067	RP11-103C3.1,RP11-103C3.2,RNU6-403P,RP11-191N8.2,RP11-815M8.1,DUSP10
1	183023696	183561724	Gain	0.0207575	RP11-548N1.1,AL137800.1,LAMC2,SMG7-AS1,NCF2,LAMC1,RP11-181K3.4,NMNAT2,SMG7
2	203485097	204021436	Gain	0.0198618	AC098831.4,KRT8P15,AC010900.2,RP11-544H14.1,RPL7P14,SNORA1,AC023271.1,AC023271.2,FAM117B,ICA1L,WDR12,CARF,NBEAL1
9	139435384	139978618	Gain	0.0392257	RP11-413M3.4,MIR4674,U3,RP11-251M1.1,MIR126,AL590226.1,SNHG7,LCN10,LCN8,ATP6V1G1P3,TMEM141,CCDC183,RP11-216L13.19,CCDC183-AS1,NCLP1,MIR4292,PHPT1,MAMDC4,EDF1,MIR4479,RP11-229P13.2,RP11-229P13.25,C8G,LCN12,C9orf141,PTGDS,LCNL1,C9orf142,CLIC3,C9orf139,FUT7,RP11-229P13.20,ENTPD2,RP11-229P13.15,SAPCD2,RP11-229P13.23,UAP1L1,NOTCH1,RP11-611D20.2,EGFL7,AGPAT2,FAM69B,LCN6,LCN6,LCN15,RP11-216L13.17,C9orf1…
2	121161402	121703132	Gain	0.0496022	LINC01101,AC073257.2,AC073257.1,Y_RNA,RP11-297J22.1,AC018866.1,GLI2
9	134536696	135073966	Gain	0.018092	RN7SL328P,EIF4A1P3,SNORA67,RP11-323H21.3,RP11-32B11.2,NTNG2,RAPGEF1,MED27
2	158977147	159519368	Gain	0.0155531	HNRNPDLP2,RN7SL393P,snoZ5,AC005042.2,CCDC148-AS1,AC005042.4,UPP2,UPP2-IT1,CCDC148,PKP4
1	215415384	215949579	Gain	0.00744067	VDAC1P10,SNORD116,KCTD3,USH2A
17	60695996	61239327	Gain	0.0298204	Y_RNA,RNU6-446P,SLMO2P3,MIR633,RP11-180P8.2,RP11-180P8.3,RP11-180P8.4,RP11-180P8.5,RP11-556O9.4,RP11-556O9.2,MRC2,RP11-156L14.1,RP11-453A12.1,RP11-180P8.1,TANC2,10-Mar
5	176776653	177415207	Loss	0.0484222	RGS14,PFN3,PRR7-AS1,RP11-1334A24.6,DDX41,RP11-1277A3.3,TMED9,RP11-1026M7.3,OR1X5P,AC106795.1,SUDS3P1,LMAN2,F12,GRK6,PRR7,DBN1,PDLIM7,DOK3,B4GALT7,RP11-1277A3.1,RP11-1101H11.1,RP11-423H2.5,RP11-1252I4.2,RP11-423H2.3,SLC34A1,FAM193B,RP11-1277A3.2,RP11-423H2.1,FAM153A,RP11-1026M7.2
1	176310498	176840058	Gain	0.011649	MORF4L1P7,PTP4A1P7,PAPPA2,ASTN1
9	129446592	129967440	Gain	0.018092	RP11-489N22.3,AL161731.1,LMX1B,ZBTB43,ANGPTL2,ZBTB34,RALGPS1
9	83863270	84380738	Gain	0.0295474	RPS20P25,RP11-232A1.2,RNU6-1035P,RP11-154D17.1,TLE1
2	99403795	99928334	Gain	0.049089	RNU7-46P,AC019097.7,C2ORF15,LIPT1,MRPL30,MITD1,MRPL30,LYG2,LYG1,KIAA1211L,C2orf15,TSGA10
9	74355186	74875829	Gain	0.0295474	RP11-409O11.3,Y_RNA,AL138751.1,HSPB1P1,BTF3P4,RP11-63P12.7,ABHD17B,C9orf57,TMEM2,C9orf85,GDA
1	236203281	236730679	Gain	0.00189251	Y_RNA,RNU2-70P,RP11-478H16.1,snoU13,ENO1P1,LGALS8-AS1,RP11-385F5.4,RP4-764D2.1,ERO1LB,RP11-385F5.5,NID1,GPR137B,EDARADD,LGALS8,HEATR1
3	150496092	151022566	Gain	0.0013101	RP11-373I8.1,AC020636.1,RNA5SP145,GPR171,AC078816.1,SETP11,CLRN1,GPR87,CLRN1-AS1,FAM188B2,RP11-166N6.3,RP11-166N6.2,MED12L,P2RY14
3	157441618	157960299	Gain	0.0013101	RN7SKP46,RP11-290K4.1,SHOX2,RP11-290K4.2,RSRC1
3	138273385	138797736	Gain	0.0038677	GAPDHP39,RPL23AP40,EEF1A1P25,FOXL2,C3orf72,PRR23C,FAIM,RP11-79L9.2,ATP5G1P3,RP11-548O1.3,PRR23A,PRR23B,CEP70,MRPS22,PIK3CB
17	34394292	34923041	Gain	0.0298204	CCL18,CCL3,CCL4,RN7SL301P,RP11-428O23.1,TBC1D3B,CCL3L3,CCL4L1,YWHAEP6,CCL3L1,CCL4L2,CTB-91J4.3,RNU6-1192P,RNA5SP439,PIGW,AC069363.1,AC131056.3,AC131056.5,TBC1D3G,ZNHIT3,GGNBP2,CTB-91J4.1,MYO19,TBC1D3C,TBC1D3H
20	43543245	44052992	Gain	0.000145464	STK4-AS1,Y_RNA,WFDC5,WFDC12,PI3,SEMG1,SEMG2,RP1-300I2.3,SLPI,RP3-453C12.8,DBNDD2,PIGT,PABPC1L,TOMM34,KCNS1,RP1-300I2.2,MATN4,RBPJL,SDC4,SYS1,SYS1-DBNDD2,TP53TG5,STK4
7	731661	1243748	Gain	0.0323309	RP11-449P15.2,CYP2W1,MIR339,AC091729.8,AC091729.9,ADAP1,COX19,AC073957.15,GPR146,RP11-449P15.1,AC091729.7,GPER1,ZFAND2A,PRKAR1B,HEATR2,SUN1,GET4,C7orf50
7	9529320	10049901	Gain	0.0218635	AC079756.1,GAPDHP68,AC096553.5,AC060834.2,GS1-69O6.1,AC060834.3,AC006373.1
2	86212000	86725066	Gain	0.049089	SNORD94,Y_RNA,MIR4779,RP11-301O19.1,MRPL35,U8,SNORA19,POLR1A,PTCD3,KDM3A,IMMT,REEP1
19	30128721	30635472	Gain	0.00653884	CTD-2057D4.2,CTC-448F2.3,RPL9P32,CTC-448F2.4,TAF9P3,CTC-448F2.6,PLEKHF1,C19orf12,CCNE1,URI1
11	117961909	118570410	Loss	0.00127277	HSPE1P18,RP11-215H18.5,CD3G,RP11-770J1.5,RP11-770J1.7,RN7SL86P,RP11-770J1.4,TTC36,RPL5P30,RNU6-1157P,AP002954.3,AP002954.6,SCN4B,SCN2B,AMICA1,MPZL3,MPZL2,CD3E,CD3D,UBE4A,ATP5L,RP11-770J1.3,TMEM25,IFT46,ARCN1,TREH,TMPRSS4,KMT2A,PHLDB1
9	72020697	72527024	Gain	0.0295474	RP11-548B3.3,RP11-109D9.4,C9orf135-AS1,RN7SL570P,APBA1,RP11-470P21.2,C9orf135,PTAR1
18	329586	948290	Loss	0.00883085	RP11-720L2.2,RP11-14P20.1,CETN1,RN7SKP146,AP001178.1,RP11-806L2.2,RP11-806L2.6,RP11-769O8.3,RP11-769O8.2,RNU1-109P,RP11-672L10.6,RP11-672L10.4,RP11-672L10.5,RP11-672L10.2,ADCYAP1,RP11-672L10.1,CLUL1,TYMS,ENOSF1,RP11-769O8.1,RP11-672L10.3,COLEC12,C18orf56,RP11-806L2.5,YES1
20	38871720	39378153	Gain	0.000586425	SNORD112,MAFB,RP4-644L1.2
11	120878917	121486632	Loss	0.00127277	RP11-775A1.2,RPS4XP12,BMPR1APS2,RP11-142I2.1,TBCEL,SC5D,RP11-730K11.1,TECTA,SORL1
11	45523541	46122755	Loss	0.0208064	RP11-958J22.2,RP11-958J22.3,RP11-495O11.1,CTD-2210P24.2,CTD-2210P24.3,RP11-618K13.2,C11orf94,PEX16,GYLTL1B,RP11-958J22.1,CHST1,CTD-2210P24.4,SLC35C1,CTD-2210P24.6,MAPK8IP1,RP11-430H10.4,CTD-2210P24.1,CRY2,PHF21A
1	234456245	234962528	Gain	0.00308367	RP5-827C21.1,RP5-827C21.2,RP5-827C21.6,RP5-827C21.4,COA6,RP5-855F14.1,RP5-855F14.2,U8,IRF2BP2,RP4-781K5.2,TARBP1,LINC00184,RP4-781K5.9,RP4-781K5.4,RP4-781K5.5,RP4-781K5.6,RP4-781K5.7,LINC01132,SLC35F3
11	95856250	96462509	Loss	0.00127277	MIR1260B,RNA5SP346,RP11-49K4.2,CCDC82,MAML2,JRKL,JRKL-AS1,RP11-360K13.1
11	49224216	49831630	Loss	0.0074303	CBX3P8,RP11-61N20.3,FOLH1,CTD-2026G22.1,TYRL,RP11-707M1.1
11	132701350	133306064	Loss	0.00022433	OPCML-IT2,OPCML-IT1,OPCML
3	192571029	193076940	Gain	0.000732976	VEZF1P1,ATP13A5-AS1,RP11-143P4.2,HRASLS,MB21D2,ATP13A5
3	191894727	192399804	Gain	0.000732976	FGF12-AS3,snoU13,FGF12-AS1,FGF12-AS2,FGF12
20	49206144	49709374	Gain	0.000145464	MIR1302-5,RPL36P2,TMSB4XP6,AL133228.1,PSMD10P1,AL034553.1,MOCS3,RP5-955M13.4,RP4-530I15.6,PARD6B,RP5-914P20.5,DPM1,KCNG1,BCAS4,ADNP,FAM65C
1	222795770	223301166	Gain	0.00744067	RP11-378J18.6,RP11-378J18.8,RN7SL276P,snoU13,NDUFB1P2,AIDA,BROX,FAM177B,RP11-452F19.3,TLR5,MIA3,DISP1
11	82233046	82824210	Loss	0.000389739	SNORD112,RP11-742N3.1,RP11-718B12.1,RP11-718B12.5,snoU13,RP11-659G9.1,RP11-113K21.1,SNORA70E,RP11-113K21.3,RP11-113K21.2,RP11-179A16.2,RP11-718B12.2,C11orf82,RAB30-AS1,RP11-113K21.4,FAM181B,PRCP,RP11-659G9.3,RAB30,RP11-179A16.1
5	131580033	132081896	Gain	0.0413305	MIR3936,Y_RNA,AC116366.6,IL13,IL4,SLC22A4,AC034220.3,C5orf56,AC116366.5,IRF1,IL5,RAD50,AC004237.1,KIF3A,P4HA2,PDLIM4,SLC22A5,AC004041.2
13	103524146	104025538	Gain	0.0309077	RP11-255P5.2,BIVM-ERCC5,ERCC5,SLC10A2,METTL21EP
7	14223472	14724294	Gain	0.0151315	EEF1A1P26,DGKB
13	96567400	97070044	Gain	0.0307143	RN7SL164P,HS6ST3,UGGT2
1	222295588	222795117	Gain	0.00744067	QRSL1P2,RP11-358H9.1,RNU6-791P,RP11-378J18.3,CICP13,HHIPL2,TAF1A,MIA3,RP11-400N13.1
9	125824128	126312733	Gain	0.00710295	RP11-123N4.4,MIR600HG,MIR601,CRB2,RP11-230L22.4,STRBP,DENND1A,RABGAP1
7	28709464	29206775	Gain	0.0218635	AC005013.1,TRIL,AC005013.5,AC005162.5,AC005162.4,AC007096.1,CTB-113D17.1,CREB5,CPVL,CHN2
2	185413366	185901953	Gain	0.0123434	AC010747.2,ZNF804A
9	111064187	111554987	Gain	0.0040814	AL137019.1,RP11-220D10.1,RP11-339N8.1
20	52249775	52735467	Gain	0.000977654	RNU7-14P,AC006076.1,SUMO1P1,AC005220.3,MIR4756,AC005808.3,BCAS1
11	97305328	97879408	Loss	0.000708023	RNA5SP347,RP11-379J13.1,AP003730.1,RP11-379J13.2
1	206290890	206776967	Gain	0.00744067	RP11-421E17.4,RP11-534L20.5,RP11-534L20.4,RP11-38J22.6,CTSE,SRGAP2-AS1,IKBKE,C1orf147,EIF2D,RASSF5,SRGAP2
2	119149435	119639039	Gain	0.0496022	RP11-19E11.1,EN1
17	42308564	42805874	Gain	0.0451248	AC003102.1,RN7SL507P,U3,RNU6-453P,RUNDC3A,RP5-1067M6.3,GRN,RPL7L1P5,RN7SL258P,FZD2,RP11-1072C15.7,RP11-1072C15.3,RP11-1072C15.2,RP11-1072C15.4,RN7SL819P,RP11-1072C15.1,AC003102.3,SLC25A39,FAM171A2,ITGA2B,GPATCH8,C17orf104,CCDC43,DBF4B,SLC4A1,AC003043.1
2	158321735	158820859	Gain	0.0155531	AC019186.1,RP11-546J1.1,RNU6-436P,RP11-1152H14.1,AC005539.2,AC013731.1,ACVR1C,ACVR1,UPP2,CYTIP
18	63956802	64534417	Loss	0.00109434	AC091643.1,CDH19
1	205109404	205607837	Gain	0.00744067	RP11-383G10.3,RP11-383G10.5,SNRPGP10,LEMD1-AS1,MIR135B,RP11-576D8.4,RNU2-19P,RNU6-418P,RP11-6B6.3,TMCC2,NUAK2,KLHDC8A,CDK18,MFSD4,ELK4,DSTYK,LEMD1
9	133765657	134246224	Gain	0.018092	QRFP,RP11-83J21.3,SNORA31,RNU6-881P,RP11-544A12.8,RP11-544A12.5,FIBCD1,AIF1L,RP11-544A12.4,FAM78A,PPAPDC3,LAMC3,NUP214
1	231816171	232300841	Gain	0.00308367	DISC1-IT1,RP5-865N13.2,DISC1,TSNAX-DISC1
1	191660835	192141836	Gain	0.011649	RP11-541F9.1,RGS18,RP11-541F9.2
7	31332089	31814451	Gain	0.0227997	AC006380.1,RP11-463M14.1,NEUROD6,PPP1R17,CCDC129,PDE1C,AC006380.3
13	97538820	98023111	Gain	0.0428835	HSP90AB6P,TULP3P1,RP11-65L19.4,RN7SKP7,SNORD112,OXGR1,snoU13,RNA5SP37,LINC00359,LINC00456,MBNL2
2	199699941	200176638	Gain	0.015695	AC018717.2,RNU7-147P,AC018717.1,SATB2
13	63769605	64246745	Gain	0.00684491	LINC00376,LINC00395
5	168958483	169436127	Gain	0.0230953	RNU6-477P,CTB-37A13.1,SPDL1,DOCK2,FAM196B
7	27696653	28174491	Gain	0.0218635	AC004549.6,RN7SL365P,RNU6-979P,HIBADH,TAX1BP1,JAZF1
13	59140024	59622192	Gain	0.00291634	DNAJA1P1,HMGN2P39
7	3631115	4116507	Gain	0.0218635	AC011284.3,SDK1
1	236900538	237380455	Gain	0.00189251	RP11-182B22.2,RPL35P1,MT1HL1,RN7SKP195,ACTN2,RYR2,MTR
1	171980635	172464898	Gain	0.0207575	MIR214,MIR199A2,SNORD112,RNU6-157P,DNM3OS,C1orf105,PIGC,DNM3
3	167135363	167620525	Gain	0.0023226	HMGN1P8,RP11-298O21.7,RP11-298O21.3,MEMO1P3,SERPINI2,PDCD10,RP11-298O21.6,RP11-298O21.2,WDR49,SERPINI1,RP11-298O21.5
18	4483453	5052333	Loss	0.00233746	AP005138.1,PPIAP14,RP11-172F10.1
11	72640600	73210072	Loss	0.000212464	AP002381.2,RP11-800A3.2,RP11-800A3.4,OR8R1P,RP11-800A3.7,AP002761.1,RP11-809N8.2,RP11-809N8.4,RP11-809N8.6,RP11-800A3.3,P2RY2,ARHGEF17,RELT,FCHSD2,P2RY6,FAM168A
13	61592946	62068438	Gain	0.00450528	MIR3169,PCDH20
11	111182531	111731487	Loss	0.000708023	MIR4491,RNU2-60P,RP11-794P6.1,RP11-794P6.3,RP11-794P6.2,MIR34B,MIR34C,RN7SKP273,BTG4,RP11-794P6.6,C11orf88,PPP2R1B,RP11-108O10.2,ALG9-IT1,POU2AF1,LAYN,SIK2,AP000925.2,ALG9,ALG9
11	98878019	99423545	Loss	0.000708023	RN7SKP53,AP003558.1,CNTN5
18	63199566	63732881	Loss	0.00109434	RP11-389J22.1,RP11-389J22.3,RP11-775G23.1,CDH7
11	71291471	71834288	Loss	0.00011479	OR7E87P,UNC93B6,OR7E4P,RP11-684B2.5,AP003498.1,RPS3AP41,RP11-167J8.4,RP11-167J8.3,AP003498.2,ALG1L9P,AP002495.1,DEFB108B,RNA5SP342,CTD-2313N18.8,CTD-2313N18.7,OR7E128P,AP000719.1,RP11-757C15.4,RNU6-292P,MIR3165,AP002490.1,snoU13,ANAPC15,FAM86C1,CTD-2313N18.5,ZNF705E,RP11-849H4.2,OR7E126P,IL18BP,NUMA1,RP11-849H4.4,LRTOMT,LAMTOR1,ENPP7P8,RNF121,FOLR3,KRTAP5-11,AP000867.1
16	14216086	14747102	Loss	0.0230953	TVP23CP2,AC040173.1,Y_RNA,MIR193B,MIR365A,RP11-65J21.1,RP11-65J21.4,AC092291.1,AC092291.2,RN7SL274P,RNU7-125P,BFAR,MKL2,CTA-276F8.2,RP11-65J21.3,PARN
5	146783657	147310363	Loss	0.0238422	CTC-327F10.1,CTC-327F10.5,CTC-327F10.4,EEF1GP2,SPINK1,SCGB3A2,C5orf46,JAKMIP2,DPYSL3
16	11149750	11679822	Loss	0.0230953	RP11-66H6.3,HNRNPCP4,SOCS1,TNP2,PRM3,SNORA48,PRM2,PRM1,snoU13,MIR548H2,Y_RNA,RP11-485G7.6,AC009121.1,CTD-3088G3.4,CTD-3088G3.6,snoU13,RN7SL522P,RP11-396B14.2,RP11-485G7.5,CLEC16A,RMI2,LITAF,CTD-3088G3.8
11	59348380	59868648	Loss	3.81e-06	MIR3162,RN7SKP192,OR10V1,OR10Y1P,OR10V3P,OR10V2P,AP000640.10,FABP5P7,MRPL16,SRD5A3P1,OOSP1,RP11-736I10.1,OOSP2,RP11-736I10.2,MS4A2,AP000442.1,PATL1,AP000640.2,GIF,TCN1,MS4A3,OSBP,STX3
5	143013271	143486209	Gain	0.0413305	MIR5197,CTB-70D19.1,HMHB1,CTB-57H20.1
17	56508057	56982451	Gain	0.0451248	AC023992.1,RP11-112H10.6,C17orf47,U3,RNU1-60P,CTD-2200P10.1,RNU1-108P,CTD-2200P10.3,RNU1-52P,RNU1-85P,RNU6-518P,RP11-579O24.1,HSF5,MTMR4,4-Sep,RAD51C,TEX14,PPM1E,RP11-112H10.4
20	56148172	56622038	Gain	0.000346926	RP4-718J7.4,MIR4532,AL354984.1,RP13-379L11.2,AL354984.3,ZBP1,PMEPA1
3	64654305	65128086	Gain	0.0415716	ADAMTS9,ADAMTS9-AS2
11	31173243	31684442	Loss	0.047587	AL133376.1,AL162614.1,CYCSP25,RP1-296L11.1,AC108456.1,DNAJC24,DCDC1,ELP4,Z83001.1,IMMP1L
3	126273470	126745295	Gain	0.0122297	RNA5SP138,RP11-390G14.1,RP11-605F14.2,RCC2P4,C3orf22,TXNRD3NB,NUP210P1,TXNRD3,CHCHD6,PLXNA1
2	160062609	160535473	Gain	0.00961489	AC009506.2,Y_RNA,AC009506.1,WDSUB1,AC008277.1,TANC1,RP11-311B14.1,AC009961.3,BAZ2B
11	83267986	83774103	Loss	0.000708023	RP11-160H12.3,LDHAL6DP,RP11-160H12.2,DLG2
18	39062967	39576234	Loss	0.00119061	RP11-188I24.1,AC011225.1,RP11-142I20.1,PIK3C3
20	14691123	15165523	Gain	0.00950974	RPS10P2,RP5-974N19.1,RNU6-1159P,RNU6-115P,MACROD2-AS1,MACROD2
11	709861	1230810	Loss	0.0295474	AP006621.5,AP006621.1,AP006621.6,CEND1,SLC25A22,RPLP2,SNORA52,AP006621.8,EFCAB4A,POLR2L,RP11-1391J7.1,RNU6-1025P,AP006477.1,RP13-870H17.3,EPS8L2,AP006621.9,TALDO1,PDDC1,PIDD,PNPLA2,CD151,TSPAN4,CHID1,AP2A2,MUC6,MUC2,MUC5AC
13	53500579	53968567	Gain	0.00291634	PCDH8P1,RN7SL618P,AL450423.1,LINC01065,OLFM4
2	168669343	169137498	Gain	0.0314804	AC067940.1,AC016723.4,B3GALT1,STK39
9	127751074	128219867	Gain	0.018092	PRPS1P2,RP11-366O20.5,HSPA5,RP11-65N13.6,RNU6-1020P,RP11-184B22.2,RABEPK,RP11-65N13.8,SCAI,GAPVD1,MAPKAP1,PPP6C
20	61669036	62137355	Gain	9.78e-05	HAR1B,RP5-963E22.5,MIR124-3,BIRC7,MIR3196,MIR4326,RNU6-994P,RP11-358D14.2,RP4-697K14.3,RP11-305P22.9,LINC01056,RP5-963E22.4,YTHDF1,NKAIN4,ARFGAP1,COL20A1,KCNQ2,HAR1A,CHRNA4,RP11-261N11.8,EEF1A2
8	21172943	21694746	Loss	0.0310569	AC009695.1,AC022716.1,OR6R2P,GFRA2
9	73641640	74104808	Gain	0.0295474	TRPM3
13	49671235	50135336	Gain	0.00685872	COX7CP1,OGFOD1P1,MLNR,SNRPGP14,CDADC1,AL136218.1,SETDB2,PHF11,RCBTB1,FNDC3A,CAB39L
13	91667999	92133941	Gain	0.0102944	BRK1P2,LINC00380,PPIAP23,MIR17HG,LINC00379,GPC5
3	153072561	153536236	Gain	0.0013101	RP11-292E2.2,RNU6-901P,Y_RNA,RP11-292E2.1,RP11-292E2.4,C3orf79,RP11-23D24.2
20	42790018	43253131	Gain	0.000145464	FITM2,Y_RNA,RP5-881L22.5,RP5-881L22.6,MIR3646,AL132772.1,RP5-1013A22.5,RP5-1013A22.2,RPL37AP1,JPH2,OSER1,OSER1-AS1,GDAP1L1,R3HDML,HNF4A-AS1,C20orf62,SERINC3,PKIG,Z97053.1,TTPAL,ADA,HNF4A
9	130102154	130561066	Gain	0.018092	RP11-356B19.11,SLC2A8,RPL12,SNORA65,Y_RNA,MIR3911,C9orf117,TOR2A,CDK9,MIR3960,ZNF79,LRSAM1,PTRH1,TTC16,SH2D3C,FPGS,FAM129B,STXBP1,GARNL3
1	178534221	178992447	Gain	0.0207575	RP5-1098D14.1,MIR4424,RP11-428K3.1,SNORA63,PTPN2P1,ANGPTL1,RALGPS2
17	28353878	28811299	Gain	0.0235086	RNY4P13,RNY4P13,AC104984.4,RP11-1148O4.1,MIR3184,MIR423,RP11-354P11.3,RP11-354P11.8,RP11-354P11.4,SNORD63,RNU6-1267P,Y_RNA,RNU6-990P,SLC6A4,BLMH,TMIGD1,CPD,RP11-1148O4.2,NSRP1,RP11-354P11.2,GOSR1,EFCAB5
11	91429589	91922990	Loss	0.00127277	TUBB4BP4,RPL7AP57,RP11-201M22.1
2	101343679	101802078	Gain	0.049089	AC016738.3,RP11-426K3.1,RN7SL548P,RP11-299H21.1,AC016738.4,RPL31,NPAS2,AC092168.2,TBC1D8
2	189583717	190045627	Gain	0.0123434	MIR1245A,AC133106.2,MIR3129,DIRC1,COL3A1,AC079613.1,COL5A2
21	33567578	34025924	Gain	0.0413305	AP000265.1,MIS18A,AP000266.7,RN7SL109P,SNORA80,C21orf119,EXOSC3P1,SNORA33,RNA5SP490,TCP10L,OR7E23P,MIS18A-AS1,AP000275.65,C21orf59,AP000275.64,MRAP,URB1,EVA1C,LINC00846,SYNJ1,LINC00159
1	201455884	201914263	Gain	0.00381537	RP11-134G8.6,AC096677.1,RP11-25B7.1,MIR5191,RNU6-501P,MIR1231,SHISA4,RP11-134G8.7,RPS10P7,RP11-90L20.2,RP11-307B6.3,LMOD1,CSRP1,NAV1,IPO9-AS1,IPO9
1	156397982	156855617	Gain	0.0458959	Y_RNA,RP11-284F21.8,snoU13,TTC24,AL365181.1,APOA1BP,RP11-284F21.11,HAPLN2,RP11-284F21.9,NES,RP11-66D17.3,CRABP2,RP11-66D17.5,RRNAD1,MRPL24,C1orf61,RP11-98G7.1,MEF2D,GPATCH4,BCAN,RP11-284F21.10,ISG20L2,HDGF,SH2D2A,NTRK1,INSRR,IQGAP3,RP11-284F21.7,PRCC
7	4126141	4583267	Gain	0.0218635	CYP3A54P,SDK1
3	165509351	165957104	Gain	0.0013101	MTND4P17,RP11-12N13.6,MTND3P7,RP11-12N13.4,RP11-12N13.2,BCHE
1	210780548	211225288	Gain	0.011649	IPO8P1,KCNH1,HHAT
5	914233	1359937	Gain	0.0451248	RP11-661C8.3,RP11-43F13.3,AC116351.1,AC116351.2,RP11-43F13.4,MIR4635,CTD-3080P12.3,MIR4457,RP11-661C8.2,NKD2,SLC12A7,SLC6A19,SLC6A18,TERT,CLPTM1L,TRIP13
2	224397462	224847340	Gain	0.0314804	SCG2,AC012512.1,MRPL44,AC073641.2,SERPINE2,AP1S3,WDFY1
5	149020167	149472485	Gain	0.0413305	U3,RN7SL868P,MIR378A,AC008427.2,Y_RNA,AC011406.2,RPS20P4,snoU13,SLC26A2,TIGD6,CSF1R,PPARGC1B,PDE6A,HMGXB3
3	57423247	57876415	Gain	0.0325174	snoU13,Y_RNA,RNU6-1181P,RNF7P1,RP11-229A12.2,RNU6-108P,RNU6-483P,PDE12,RP11-755B10.4,RNU6ATAC26P,RP11-755B10.3,Y_RNA,ARF4,RP11-755B10.2,RP11-332H21.2,DNAH12,SLMAP,DENND6A
9	90280801	90731440	Gain	0.018092	RP11-65B23.3,AL160279.1,XXyac-YM21GA2.1,XXyac-YM21GA2.6,CTSLP8,XXyac-YM21GA2.3,XXyac-YM21GA2.4,SPATA31E1,RP11-350E12.5,U6,RPS10P3,RP11-350E12.4,CTSL,CTSL3P,XXyac-YM21GA2.7,SPATA31C1,CDK20,DAPK1
9	88829688	89277484	Gain	0.018092	RP11-507D14.4,RN7SKP264,RP11-229M1.2,RP11-359J6.1,RNU2-36P,ISCA1,ZCCHC6,C9orf153,RP11-395D3.1
5	150473675	150963802	Loss	0.0362889	CTB-17P3.4,CTC-224D3.1,AC034205.1,CTB-23I7.2,CTB-23I7.3,RNA5SP197,CTC-251D13.1,ANXA6,SLC36A3,SLC36A2,CTB-23I7.1,FAT2,CCDC69,GM2A,SLC36A1
1	174984886	175429373	Gain	0.0207575	Y_RNA,RP5-1114G22.2,RP5-1114G22.1,SDCCAG3P2,KIAA0040,RP3-518E13.2,MRPS14,TNR,TNN
9	119572335	120027912	Gain	0.0109391	AL354981.1,RPL10P3,SNORA70C,RN7SKP128,ASTN2
5	136351988	136798441	Gain	0.0413305	SPOCK1
2	168103701	168558672	Gain	0.0314804	RNU7-148P,AC074363.1,XIRP2
7	26871965	27328346	Gain	0.0151315	RPL7AP38,HMGB3P20,AC004079.1,TPM3P4,NHP2P2,HOXA1,HOTAIRM1,HOXA2,HOXA4,HOXA6,RP1-170O19.23,RP1-170O19.21,HOXA9,HOXA10-AS,MIR196B,HOXA11,HOXA11-AS,HOXA13,EVX1-AS,EVX1,RPL35P4,HOXA3,HOXA-AS2,RP1-170O19.22,HOXA-AS3,HOXA5,HOXA7,RP1-170O19.20,HOXA10,RP1-170O19.14,HOTTIP,RP1-170O19.17,SKAP2
2	140695102	141140628	Gain	0.049089	RN7SL283P,AC092156.3,MTND2P19,MTND1P27,AC073928.2,LRP1B
20	9675811	10122211	Gain	0.0270241	AL109754.1,RP5-839B4.8,ANKEF1,PAK7,SNAP25-AS1
2	179502827	179953037	Gain	0.0123434	RP11-171I2.3,RP11-171I2.1,RP11-88L24.4,RNU7-104P,RPS6P2,ACA59,TTN-AS1,TTN,CCDC141
13	76615911	77071122	Gain	0.00291528	RN7SL571P
3	117156738	117603204	Gain	0.0349244	RNU6-1200P,RP11-768G7.1,RP11-768G7.3,RP11-768G7.2,LSAMP,RP11-384F7.2
3	66298962	66744271	Gain	0.0415716	RNU6-787P,RN7SL482P,RP11-814M22.2,RPL21P41,SLC25A26,LRIG1
2	88699368	89130753	Gain	0.0496022	RNU6-1007P,AC012671.2,AC012671.1,TEX37,AC062029.1,AC096579.1,MIR4436A,FOXI3,ANKRD36BP2,AC096579.7,AC104134.2,EIF2AK3,RPIA,AC096579.13
3	172464001	172898727	Gain	0.0013101	SNORA72,RNU4-4P,ATP5G1P4,RP11-816B4.1,snoU13,ECT2,SPATA16,RP11-324C10.1
13	98755189	99196939	Gain	0.0428835	RN7SKP8,MIR3170,RP11-573N10.1,RP11-261P24.2,FARP1-AS1,FARP1,RNF113B,STK24
13	38225210	38666373	Gain	0.0216367	RNA5SP26,HSPD1P9,TRPC4,LINC00571
13	98315395	98754526	Gain	0.0428835	RP11-120E13.1,snoU13,RPL7AP61,FTLP8,RP11-383H17.4,IPO5
7	36042222	36475772	Gain	0.032006	PP13004,RP11-196O2.1,MARK2P13,RP11-377H23.1,AC007327.6,AC007327.5,AC006960.5,RP11-182J23.1,Y_RNA,AC083864.3,KIAA0895,EEPD1,ANLN
9	130562788	131000873	Gain	0.018092	Y_RNA,Y_RNA,RNA5SP296,MIR4672,PIP5KL1,RP11-203J24.8,DPM2,RP11-379C10.4,RP11-395P17.11,PTGES2,AL590708.2,LCN2,FPGS,ENG,RP11-228B15.4,AK1,RP11-203J24.9,ST6GALNAC6,FAM102A,NAIF1,SLC25A25,RP11-395P17.3,C9orf16,DNM1,ST6GALNAC4,RP11-379C10.1,CIZ1
13	38667778	39098913	Gain	0.0216367	LINC00571,UFM1
17	29280316	29710351	Gain	0.0412326	AC091177.1,RN7SL138P,RP11-848P1.3,RP11-848P1.2,DPRXP4,RP11-848P1.4,RP11-848P1.7,RP11-848P1.5,MIR4733,RP11-142O6.1,EVI2A,AK4P1,ADAP2,RNF135,RP11-271K11.5,EVI2B,CTD-2370N5.3,NF1,OMG,RP11-848P1.9
13	78011919	78455941	Gain	0.00450528	SCEL-AS1,RNY3P7,MIR3665,EDNRB-AS1,SPTLC1P5,SLAIN1,SCEL
7	29206776	29648107	Gain	0.0230702	NANOGP4,RP11-550A18.1,AC004593.3,AC007255.8,PRR15,ZNRF2P2,CPVL,CHN2
7	32280067	32717473	Gain	0.0227997	AC018641.7,SLC25A5P5,LSM5,PDE1C,AVL9,DPY19L1P1
3	127494236	127929153	Gain	0.0040814	RNA5SP139,RNU2-37P,SEC61A1,RNU6-823P,MGLL,KBTBD12,RUVBL1,RUVBL1-AS1,EEFSEC
1	221118814	221563143	Gain	0.00744067	RP11-453O22.1,RP11-421L10.1
3	168314501	168753729	Gain	0.0023226	RP11-694D5.1,RPL21P43,RP11-368I23.3,RP11-368I23.4,RP11-368I23.2,RP11-152C17.1,EGFEM1P
1	223510435	223953298	Gain	0.00744067	RNU4-57P,C1orf65,WI2-2998D17.2,SNRPEP10,RNU6-1248P,CAPN2,SUSD4,CAPN8
3	190022324	190461988	Gain	0.000732976	GCNT1P3,RN7SKP296,RP11-268E23.2,RP11-95L3.2,CCT6P4,CLDN1,TMEM207,CLDN16,IL1RAP
1	164184998	164620089	Gain	0.0207575	NMNAT1P2,RNU5F-6P,HMGB3P6,RNU6-171P,PBX1
11	120405521	120878916	Loss	0.000708023	TCEB1P22,HMGB1P42,RP11-640N11.2,GRIK4
3	87809086	88214145	Gain	0.0234456	RNU6ATAC6P,HTR1F,CBX5P1,ZNF654,CGGBP1,RP11-159G9.5,RP11-451B8.1,C3orf38
9	137597999	138008243	Gain	0.0392257	AL603650.2,AL603650.3,MIR3689C,MIR3689A,MIR3689D1,AL603650.4,AL603650.1,MIR3689B,MIR3689D2,MIR3689E,MIR3689F,RP11-263F14.3,RP11-447M12.2,FCN2,FCN1,OLFM1,COL5A1
8	19667560	20143688	Loss	0.0310569	RPL30P9,RNU6-892P,INTS10,AC100802.3,SLC18A1,ATP6V1B2,LZTS1,LZTS1-AS1,LPL
5	138072083	138495158	Gain	0.0413305	RN7SL867P,LRRTM2,RNA5SP194,CTB-46B19.1,AC034243.1,CTB-46B19.2,CTNNA1,SIL1
20	40679107	41108120	Gain	0.000586425	RP5-1121H13.4,PTPRT
2	208504593	208909575	Gain	0.038105	AC079767.3,AC079767.4,RNU6-664P,PPP1R14BP2,Y_RNA,RP11-801F7.1,MIR4775,AC096772.6,AC083900.1,RNU6-360P,AC093698.1,CCNYL1,FZD5,PLEKHM3
11	41957139	42438014	Loss	0.0349244	RP11-148I19.1,CTD-2572N17.1
11	57889549	58372119	Loss	0.000708023	OR9I2P,OR5BL1P,OR9Q2,OR1S2,OR10Q1,EIF4A2P3,OR10W1,OR10Q2P,OR5BC1P,OR5B19P,OR5B10P,AP000435.3,OR5B17,OR5B1P,OR5B15P,OR5B3,OR5B2,OR5B12,RP11-655C2.3,OR5B21,OR1S1,ZFP91,ZFP91-CNTF,OR9Q1,LPXN
11	67294309	67770618	Loss	6.68e-05	RN7SL59P,GSTP1,RP11-655M14.12,NDUFV1,DOC2GP,NUDT8,ACY3,RPL37P2,UNC93B5,RP11-655M14.6,AP003385.1,OR7E11P,RP11-655M14.14,ALG1L8P,RP11-119D9.4,RNU6-46P,RPS3AP40,AC004924.1,RP5-903G2.2,RP5-901A4.4,RP5-901A4.5,OR7E1P,RP11-655M14.13,TBX10,AP003385.2,ALDH3B2,RP11-655M14.4,FAM86C2P,RP11-119D9.1,C11orf72,UNC93B1
11	99423546	99905301	Loss	0.00127277	CNTN5
9	80277516	80679305	Gain	0.0295474	GNAQ
13	42247986	42651002	Gain	0.0306693	RN7SL515P,RNU6-74P,RPS28P8,RP11-187A9.3,MAPK6PS3,KARSP1,VWA8,DGKH
1	232300842	232708195	Gain	0.00308367	RP5-865N13.1,RN7SL299P,RP5-865N13.2,RP11-284L19.1,SIPA1L2
2	223443761	223852352	Gain	0.0198618	AC104772.1,snoU13,AC016712.1,AC016712.2,ATG12P2,AC097461.4,AC013476.1,MOGAT1,FARSB,ACSL3
2	155952930	156360558	Gain	0.0155531	AC092662.2,MTND2P20,ATP5A1P2,MTND4P28,MTND5P30,MTND6P9,AC092662.6,RNU6-546P
7	11124529	11553162	Gain	0.0218635	NPM1P11,AC004160.4,PHF14,AC004538.3,THSD7A
7	29648354	30071211	Gain	0.0230702	TMSB4XP3,MIR550A3,snoU13,ZNRF2P2,AC007285.6,FKBP14,DPY19L2P3,WIPF3,SCRN1,PLEKHA8
13	91195865	91604882	Gain	0.0102944	RNU6-75P,LINC00410
17	59446196	59872404	Gain	0.0451248	RP11-332H18.3,TBX2,NACA2,AC002994.1,RP11-332H18.5,RP11-332H18.4,C17orf82,TBX4,RP11-15K2.2,BCAS3,BRIP1
3	125311308	125734271	Gain	0.0122297	GS1-388B5.2,GS1-388B5.1,AF186996.2,OR7E130P,OR7E29P,OR7E93P,OR7E53P,AF186996.1,OR7E97P,GS1-388B5.8,RP11-379B18.1,MIR548I1,RPS3AP14,RP11-379B18.3,AC092902.1,RP11-666A20.4,FAM86JP,RP11-666A20.3,RP11-379B18.6,ENPP7P4,ALG1L,SLC41A3,OSBPL11,RP11-379B18.5,ROPN1B
2	171977767	172402536	Gain	0.0246357	snoU13,AC008065.1,DAP3P2,AC007969.4,AC007969.5,DCAF17,CYBRD1,METTL8,TLK1
1	189256792	189679456	Gain	0.0207575	RNA5SP73
13	20115374	20527410	Gain	0.0307936	ESRRAP1,CASC4P1,LINC00350,AL354808.1,RP11-523H24.3,AL354808.2,RN7SL166P,ST6GALNAC4P1,RP11-61K9.2,snoU13,AL591925.1,MRPS31P2,MPHOSPH8,ZMYM5,PSPC1
2	167675557	168095806	Gain	0.0314804	AC092601.1,XIRP2-AS1,XIRP2
17	55562229	55964834	Gain	0.0451248	RP11-118E18.2,RP11-118E18.4,RN7SL449P,RNU7-134P,CCDC182,RN7SKP94,RP11-60A24.3,MRPS23,CUEDC1,MSI2
18	36041125	36515969	Loss	0.00080158	RP11-687D19.1
3	147897083	148310500	Gain	0.0013101	RP11-501O2.3,RP11-501O2.4,RP11-501O2.5
5	74540735	75016846	Loss	0.0466735	CTD-2235C13.3,CTD-2235C13.1,RNU7-175P,CTC-366B18.2,CTC-366B18.4,RNU6-680P,CTD-2235C13.2,HMGCR,ANKDD1B,COL4A3BP,POLK,POC5
11	114658637	115136713	Loss	0.000708023	ACA59,CADM1
1	163090553	163510211	Gain	0.0207575	RP11-267N12.2,RP11-77M5.1,SNORD112,RP11-408E1.1,RNA5SP62,RNA5SP63,RP11-267N12.1,RP11-267N12.3,RGS5,NUF2
13	44462985	44882626	Gain	0.0216367	DGKZP1,LACC1,SMIM2-AS1,SMIM2,SMIM2-IT1,RP11-478K15.6,LINC00284,LINC00390
2	137464289	137866131	Gain	0.049089	THSD7B
3	176900851	177314358	Gain	0.00226554	ASS1P7,RN7SKP52,LINC00501,RP11-706D8.3,TBL1XR1,LINC00578
2	137037120	137464271	Gain	0.049089	UBBP1,RN7SKP141,AC010146.2,AC010146.1,AC092786.1
1	180258759	180682846	Gain	0.0310969	MIR3121,Y_RNA,AL358354.1,VDAC1P4,OVAAL,XPR1,ACBD6
1	162417689	162836849	Gain	0.0207575	UQCRBP2,RP11-359K18.3,RP11-359K18.4,RN7SL861P,UHMK1,UAP1,HSD17B7,C1orf110,RP11-331H2.4,DDR2
13	65395607	65811710	Gain	0.00684491	LGMNP1
13	34125183	34537814	Gain	0.0149842	RP11-37L2.1,RP11-179A7.2,RNU5A-4P,AL161891.1,RP11-141M1.3,RFC3
1	234034233	234456244	Gain	0.00308367	RP11-488L4.1,RAC1P7,RP4-799P18.2,RP4-799P18.5,MIR4671,RP4-799P18.4,RP4-799P18.3,SLC35F3
1	239258400	239679543	Gain	0.00114975	RP11-544D21.2,RP11-544D21.1,CHRM3
20	1193685	1619164	Gain	0.0377153	AL136531.1,RP11-314N13.3,AL109658.1,RNU6-917P,RP4-576H24.5,RAD21L1,SNPH,SDCBP2,FKBP1A,SIRPB2,RP4-576H24.2,SIRPD,SIRPG,RP11-77C3.3,SDCBP2-AS1,NSFL1C,RP4-576H24.4,SIRPB1
13	30884562	31310579	Gain	0.0149842	LINC00427,LINC01058,UBE2L5P,RBM22P2,MFAP1P1,PTPN2P2,LINC00426,HMGB1,USPL1,ALOX5AP
3	191487404	191894726	Gain	0.000732976	RP11-655G22.2,AC026320.1,RP11-655G22.1,RN7SKP222,FGF12
13	48997928	49409343	Gain	0.00685872	LINC01077,AL137118.1,PSME2P2,LPAR6,RCBTB2,RB1,LINC00462,CYSLTR2
13	30379613	30803252	Gain	0.0149842	TIMM8BP1,LINC00572,RP11-629E24.2,LINC00365,LINC00384,LINC00385,AL356750.1,LINC00297,LINC00544,KATNAL1,UBL3
11	74895254	75363330	Loss	6.68e-05	ZDHHC20P3,TPBGL,CTD-2562J17.7,CTD-2562J17.9,MIR326,SNORD15A,SNORD15B,SERPINH1,CTD-2530H12.8,CTD-2530H12.7,CTD-2530H12.5,CTD-2562J17.4,ARRB1,RPS3,KLHL35,RP11-939C17.4,CTD-2530H12.4,SLCO2B1,GDPD5,MAP6
13	96154596	96546377	Gain	0.0307143	MTND5P2,MTND6P18,MTCYBP3,snR65,HMGN1P24,CLDN10-AS1,DZIP1,DNAJC3-AS1,CLDN10,DNAJC3,UGGT2
1	206962380	207360997	Gain	0.00744067	IL20,RP11-564A8.8,RP11-564A8.4,snoU13,C4BPB,RP11-164O23.5,IL19,IL24,PIGR,FCAMR,C1orf116,C4BPA,FAIM3,YOD1,PFKFB2,C4BPAP1,RP11-164O23.7
20	49843436	50223975	Gain	0.000145464	AL079339.1,NFATC2,MIR3194,ATP9A
9	107125806	107503333	Gain	0.00122455	OR13F1,OR13C4,OR13D2P,OR13C5,OR13C2,OR13C9,OR13I1P,OR13C1P,OR13D1,OR13D3P,OR13C3,OR13C8
17	57171147	57567551	Gain	0.0451248	AC099850.1,RNU2-58P,MIR454,MIR301A,CTD-2510F5.2,CTD-2510F5.4,SMG8,Y_RNA,SNRPGP17,MIR4729,RP11-567L7.5,SKA2,GDPD1,TRIM37,PRR11,CTD-2510F5.6,YPEL2,RP11-567L7.6
13	57660394	58051240	Gain	0.00685872	PRR20A,PRR20B,PRR20C,PRR20E,PRR20FP,MTCO2P3,SLC25A5P4,RPL31P53,PRR20D
9	115702066	116085422	Gain	0.0023226	MUPP,FAM225A,ZNF883,ZFP37,SLC31A2,FKBP15,CDC26,PRPF4,RNF183,WDR31,FAM225B,SLC31A1
13	72917832	73294682	Gain	0.00262229	SNORD37,RPL18AP17,SNORA68,SNORA9,RPL21P110,RNU6-80P,MZT1
13	27965545	28360486	Gain	0.00953436	RNY1P1,AL137059.1,RNU6-63P,NPM1P4,GTF3A,MTIF3,POLR1D,LNX2
20	47744947	48145528	Gain	0.000145464	ARPC3P1,ZFAS1,SNORD12C,SNORD12B,SNORD12,STAU1,ZNFX1,KCNB1,PTGIS,DDX27
18	10038833	10503662	Loss	0.00371171	RP11-243E13.2,snoU13,RP11-243E13.1,RP11-419J16.1,RP11-138E9.2,APCDD1
9	17441744	17832232	Gain	0.038105	RP11-492A12.2,PABPC1P11,CNTLN,SH3GL2
13	43391673	43790912	Gain	0.0216367	LINC00428,ZDHHC4P1,LINC00400,EPSTI1,DNAJC15,ENOX1
2	141237995	141627088	Gain	0.049089	AC117947.1,LRP1B
9	118251349	118642034	Gain	0.0109391	RP11-284G10.1
1	230183334	230583322	Gain	0.0179843	BX323860.1,RP5-956O18.2,RP5-956O18.3,AL691479.1,GALNT2,PGBD5
2	206386331	206785190	Gain	0.038105	AC007362.3,AC007362.1,RN7SKP178,PARD3B,NRP2
20	2886851	3277851	Gain	0.0270241	GNRH2,MRPS26,OXT,RN7SL555P,RN7SL839P,AVP,UBOX5-AS1,UBOX5,FASTKD5,DDRGK1,ITPA,SLC4A11,PTPRA,C20orf194,LZTS3
13	41648573	42036066	Gain	0.0216153	MIR3168,RN7SL597P,KBTBD6,CALM2P3,snoU13,KBTBD7,MORF4L1P4,RAC1P3,RNU6-57P,TUBBP2,OR7E36P,OR7E155P,OR7E37P,AL354833.1,AL354833.2,AL354833.3,WBP4,RGCC,MTRF1,NAA16
9	131009113	131397478	Gain	0.018092	AL590708.1,AL359091.2,RP11-339B21.15,RP11-339B21.14,RP11-339B21.13,MIR219-2,RP11-339B21.10,RP11-339B21.8,ODF2-AS1,AL359091.1,RNU7-171P,DNM1,GOLGA2,SWI5,COQ4,SLC27A4,TMSB4XP4,URM1,RP11-339B21.11,CERCAM,ODF2,GLE1,RP11-216B9.6,WDR34,SPTAN1,TRUB2
9	120261121	120651206	Gain	0.0109391	RP11-500B12.1,RPL35AP22,RNU6-1082P,snoZ13_snr52,TLR4,RP11-281A20.1,RP11-281A20.2
2	142480805	142863159	Gain	0.049089	AC012003.1,LRP1B
18	44338245	44802609	Loss	0.00223457	RP11-742D12.2,RP11-687F6.1,TCEB3CL2,TCEB3CL,TCEB3C,TCEB3B,RP11-49K24.8,RP11-49K24.5,RNU6-1131P,RP11-49K24.4,HDHD2,SKOR2,ST8SIA5,PIAS2,RP11-687F6.4,KATNAL2,IER3IP1,IER3IP1
2	107000207	107389110	Gain	0.0496022	AC108868.3,AC108868.6,EEF1A1P12,PLGLA,RGPD3,AC108868.1,CD8BP,AC108868.5
1	192449934	192840948	Gain	0.011649	AL136987.1,RP5-1011O1.3,RGS1,MIR4426,RP3-419C19.3,RP3-419C19.2,RGS2,RP5-1011O1.2,RGS13
20	38481575	38868605	Gain	0.000586425	HSPE1P1,AL009050.1,RP1-191L6.2,RP11-101E14.2,RP11-101E14.3
9	26521954	26914917	Gain	0.038105	AL442639.1,SNORA31,RP11-337A23.5,RN7SL100P,RP11-18A15.1,RP11-337A23.6,PLAA,CAAP1
3	145066107	145449825	Gain	0.0013101	RP11-622L21.1,GM2AP1
2	198898140	199293825	Gain	0.015695	AC109589.1,PLCL1,AC005235.1
11	98132694	98598541	Loss	0.000708023	CTD-2342I9.1,RP11-115E19.1
2	172840386	173239057	Gain	0.0246357	AC104801.1,snoU13,AC104088.1,HAT1,DLX1,DLX2,SLC25A12,METAP1D
1	202298109	202677178	Gain	0.00381537	CYCSP4,U6,RP11-175B9.3,SNORA70,RP11-569A11.1,RP11-569A11.2,UBE2T,RP11-175B9.2,SYT2,PPP1R12B
13	114188367	114584049	Gain	0.0428052	LINC00552,GAS6-AS2,RP11-199F6.4,LINC00454,ATP4B,TMEM255B,GAS6-AS1,TMCO3,GRK1,GAS6,TFDP1
11	2308305	2771682	Loss	0.0295474	C11orf21,RNU6-878P,RPL26P30,Y_RNA,AC124057.5,TSPAN32,CD81,TSSC4,TRPM5,KCNQ1OT1,CD81-AS1,KCNQ1
9	125154536	125548583	Gain	0.0040814	RP11-542K23.10,RP11-542K23.9,OR1J2,OR1J4,OR1N1,OR1N2,OR1L8,OR1Q1,OR1B1,OR1L1,OR1L3,TLK1P1,OR1L4,OR1L6,SKA2P1,PTGS1,OR1J1,OR1H1P,RP11-64P14.7,RP11-542K23.7
9	83474520	83852473	Gain	0.0295474	RP11-289F5.1
2	149934245	150330247	Gain	0.0155531	FAM8A3P,AC007394.3,LYPD6,LYPD6B
2	201681615	202078494	Gain	0.0246357	RP11-469M7.1,RNU6-31P,AC005037.2,AC005037.1,RNA5SP115,Y_RNA,RNU6-312P,NIF3L1,RNU6-762P,RN7SL694P,HNRNPA1P35,AC005037.4,RNU6-1206P,RP11-13J8.1,AC007272.3,AC007272.1,IMPDH1P10,RNU7-45P,AC007283.4,AC007283.5,MTND5P25,MTND4P23,BZW1,PPIL3,ORC2,NDUFB3,CFLAR-AS1,CASP10,CLK1,AC005037.3,FAM126B,CFLAR
2	190643257	191023798	Gain	0.0246357	AC008122.1,AC019178.3,HNRNPCP2,AC019178.2,ORMDL1,MSTN,PMS1,C2orf88
1	210291476	210670351	Gain	0.011649	SERTAD4-AS1,ST13P19,RP4-667H12.4,RNU5A-8P,RP5-879K22.1,SERTAD4,SYT14,HHAT
13	70236135	70636306	Gain	0.00684222	RNY3P10,PSMC1P13,KLHL1
9	92052266	92449453	Gain	0.018092	RP13-93L13.2,RP13-93L13.1,AL590233.1,GADD45G,RP11-316P17.2,SEMA4D
5	179343730	179743193	Gain	0.0415716	RPS15AP18,CTC-563A5.4,CTC-563A5.2,MIR340,RP11-39H3.1,RP11-252I14.1,RP11-252I14.2,CTB-129O4.1,GFPT2,RNF130,RASGEF1C,MAPK9
2	171410786	171805869	Gain	0.0123434	LINC01124,EIF2S2P4,AC007405.6,Y_RNA,AC007405.8,AC010092.1,HMGB1P4,AC007277.3,AC007405.4,ERICH2,GORASP2,MYO3B,SP5,GAD1
13	95205884	95595375	Gain	0.0307143	RNA5SP36,RN7SL585P,SOX21,SOX21-AS1,BRD7P5,RPL21P112,TGDS,GPR180,LINC00391
9	107604508	107993182	Gain	0.0040814	RP11-217B7.2,RP11-217B7.3,RN7SKP191,RP11-112N13.1,ABCA1
11	133306065	133768885	Loss	0.0001228	snoU13,AP005638.1,SPATA19,RP11-259P6.3,MIR4697,RP11-448P19.1,OPCML
1	232708401	233082059	Gain	0.00308367	RNU6-1211P,RP11-66A2.1,MAP10,RNU1-74P,RP4-659I19.1,RP11-66A2.2
20	7155865	7532313	Gain	0.0367153	RP11-19D2.1,RP11-19D2.2,RP4-764O22.2,RP5-988G17.1
2	148106473	148479918	Gain	0.0155531	RNU6-692P,AC013406.1,Y_RNA,RNU6-715P,RNA5SP106
1	240135772	240511474	Gain	0.00744067	RP11-438O11.1,RPS7P5,RP11-567G24.1,Y_RNA,ADH5P3,RP11-567G24.3,Y_RNA,FMN2
19	29489042	29864580	Gain	0.0109391	RNA5SP470,CTD-2081K17.2,RN7SL340P,UQCRFS1,CTB-32O4.2,CTC-525D6.1
2	172402561	172777812	Gain	0.0246357	RPL21P38,AC068039.1,AC068039.4,RNU6-182P,CYBRD1,DYNC1I2,SLC25A12
9	128220308	128589889	Gain	0.018092	RN7SL30P,RP11-12A16.3,HNRNPA1P15,RP11-423C15.3,MAPKAP1,PBX3
17	30266929	30634362	Gain	0.0279113	RNA5SP437,RP11-640N20.1,RP11-640N20.5,SH3GL1P1,RP11-640N20.6,RP11-640N20.8,RP11-640N20.9,CTD-2095E4.1,AC116407.1,AC090616.2,ARGFXP2,AC116407.2,UBL5P2,RP11-443G13.2,LRRC37B,RHBDL3,SUZ12,RHOT1
1	171610741	171980634	Gain	0.0207575	PFN1P1,RPL4P3,RP4-560B9.6,RP4-560B9.4,SCARNA20,RP4-612B18.3,Y_RNA,RP4-612B18.1,DNM3-IT1,MYOC,RP4-560B9.5,METTL13,VAMP4,DNM3
20	37379049	37747737	Gain	0.000586425	RN7SKP173,RN7SL116P,RP4-616B8.4,NPM1P19,ACTR5,FAM83D,PPP1R16B,DHX35
13	94232276	94601834	Gain	0.0216849	GPC6-AS2,GPC6
7	11553484	11926347	Gain	0.0218635	AC073109.2,AC004538.3,THSD7A
1	158681180	159050158	Gain	0.0310969	OR6K3,OR6K4P,OR6K5P,OR6K6,OR6N1,OR6N2,OR2AQ1P,OR10AA1P,RP11-393K10.1,AL359753.1,MNDA,PYHIN1,AIM2,IFI16
20	36328382	36700221	Gain	0.0011115	RN7SKP185,Y_RNA,TTI1,CTNNBL1,VSTM2L,RPRD1B
1	167156817	167526674	Gain	0.0207575	RP11-277B15.3,RP11-52A20.2,RP11-104L21.2,AKR1D1P1,RP11-277B15.2,CD247,RP11-104L21.3,POU2F1,CREG1
9	92449524	92821014	Gain	0.018092	RP11-406A20.1,MIR4290,RP5-1050E16.2,RP5-1050E16.1,RP11-406A20.4
7	34362918	34730254	Gain	0.032006	AC005493.1,NPSR1,NPSR1-AS1
2	214355691	214725733	Gain	0.0198618	MIR4438,SPAG16
1	239686177	240055114	Gain	0.00381537	CHRM3-AS2,CHRM3
2	159519369	159888917	Gain	0.0155531	AC005042.3,OR7E89P,OR7E28P,OR7E90P,RNU2-21P,BTF3L4P2,RNU6-580P,AC005042.4,AC005042.5,DAPL1,TANC1,PKP4
11	111731488	112192522	Loss	0.00191285	GNG5P3,FDXACB1,RPL37AP8,C11orf52,RNA5SP351,RP11-708L7.7,PPIHP1,RNU6-893P,RP11-708L7.9,TIMM8B,RP11-356J5.4,TEX12,RP11-356J5.5,MRPS36P4,RPS12P21,RPS6P16,AP002884.1,PLET1,ST13P10,C11orf1,CRYAB,HSPB2,HSPB2-C11orf52,RP11-708L7.6,DLAT,C11orf57,SDHD,SDHD,IL18,PTS,AP002884.2,ALG9,ALG9,DIXDC1,PIH1D2,AP002884.3,BCO2,RP11-356J5.12
19	30768759	31135676	Gain	0.00653884	AC011478.1,ZNF536
19	31560164	31933544	Gain	0.0155531	AC020952.1,CTC-439O9.3,TSHZ3,AC008992.1,AC007796.1
18	14026536	14482920	Loss	0.00378103	RP11-411B10.8,RP11-411B10.4,RP11-411B10.3,AC006557.1,RP11-411B10.6,RP11-411B10.5,RNU6-316P,RHOT1P1,RP11-757O6.1,CYP4F35P,RP11-757O6.4,TERF1P2,FEM1AP2,ZNF519,RP11-411B10.2,ANKRD20A5P,LONRF2P1,CXADRP3,NF1P5
3	149630965	149988283	Gain	0.000732976	RNU6-720P,NPM1P29,AC117395.1,RP11-651P23.5,RP11-651P23.2,HNRNPA1P24,RP11-63E16.1,snoU13,RPL32P9,RP11-167H9.6,RP11-651P23.4,RP11-167H9.5,RP11-483E7.1,ANKUB1,RNF13,PFN2,RP11-167H9.4
10	104036449	104462361	Loss	0.0279113	NFKB2,FBXL15,MIR146B,C10orf95,RP11-18I14.11,RN7SL21P,RP11-170J3.2,RNU6-43P,RP11-47A8.5,PSD,CUEDC2,RP11-18I14.10,TMEM180,ACTR1A,TRIM8,GBF1,SUFU,ARL3
9	91681960	92040063	Gain	0.018092	MIR3153,RP11-82L18.2,CKS2,SECISBP2,SHC3,SEMA4D
13	68035371	68388376	Gain	0.00450528	BCRP9
11	86797999	87240021	Loss	0.00127277	RP11-648O15.1,RP11-680L20.1,RP11-777F6.3,PSMA2P1,CTD-2028E8.1,TMEM135
9	98550468	98895270	Gain	0.0109391	RNU2-46P,RNA5SP289,LINC00092,Y_RNA,RP11-72B4.2,RP11-569G13.2,ERCC6L2,LINC00476
11	113278765	113708376	Loss	0.000708023	MIR4301,RP11-627G1.1,RP11-667M19.1,RP11-667M19.4,RP11-667M19.2,CLDN25,ATF4P4,RP11-667M19.5,LRRC37A13P,RP11-667M19.10,RP11-667M19.9,RP11-159N11.3,DRD2,TMPRSS5,USP28,ZW10
7	16176841	16523657	Gain	0.0151315	RPL36AP29,GS1-166A23.1,ISPD,ISPD-AS1,SOSTDC1
7	3281341	3629596	Gain	0.0218635	RP11-30B1.1,AC069286.1,AC073316.1,SDK1
11	32131671	32559192	Loss	0.0349244	RP1-65P5.5,WT1,WT1-AS,RP1-65P5.1
2	137917867	138280457	Gain	0.049089	RNA5SP105,THSD7B
5	179772641	180226570	Loss	0.0484222	CTC-573N18.1,RNU6-525P,RP11-451H23.1,AC122714.1,SCGB3A1,RP11-451H23.2,RP11-451H23.3,OR2AI1P,RNU1-17P,OR2Y1,CTC-205M6.5,GFPT2,FLT4,CNOT6,MGAT1
3	96688739	97034836	Gain	0.0349244	EPHA6
7	27335562	27696652	Gain	0.0151315	HNRNPA1P73,EIF4HP1,PSMC1P2,AC073150.6,AC004009.3,HIBADH
9	115343223	115694715	Gain	0.0023226	RP11-576C12.1,RP11-276E15.4,SLC46A2,RP11-408O19.5,INIP,SNX30,KIAA1958
2	164514239	164867726	Gain	0.0314804	FIGN,AC092684.1
11	85599146	86039552	Loss	0.00127277	RP11-90K17.2,SLC25A1P1,snoU13,RNU6-560P,RP11-12D16.2,FNTAL1,RP11-320L11.2,SETP17,RN7SL225P,C11orf73,CCDC83,PICALM,EED
1	168375974	168726369	Gain	0.0207575	QRSL1P1,XCL2,RP4-738P11.3,XCL1,RP4-738P11.4,AL049798.1,RP5-968D22.1,RP5-968D22.3,DPT
5	149020167	149472485	Loss	0.0362889	U3,RN7SL868P,MIR378A,AC008427.2,Y_RNA,AC011406.2,RPS20P4,snoU13,SLC26A2,TIGD6,CSF1R,PPARGC1B,PDE6A,HMGXB3
11	79723318	80173898	Loss	0.000708023	CTD-2555I5.1
17	30918210	31275427	Gain	0.0279113	Y_RNA,AC084809.2,AC084809.3,RP11-220C2.1,TMEM98,MYO1D
13	67140467	67500412	Gain	0.00684491	RNU7-87P,PCDH9-AS2,PCDH9
18	51862182	52309962	Loss	0.000328366	SNRPGP2,RP11-61D1.2,RP11-289E15.1,STARD6,DYNAP,C18orf54
13	37863209	38224149	Gain	0.0216367	LINC01048,POSTN,TRPC4
11	125561002	125979757	Loss	0.00127277	PATE1,PATE2,PATE3,PATE4,RP11-680F20.10,RP11-680F20.11,RP11-680F20.4,RP11-680F20.6,RP11-680F20.12,NAP1L1P1,RP11-673E11.2,HYLS1,PUS3,RP11-680F20.9,DDX25,RP11-680F20.5,CDON
11	91923771	92381775	Loss	0.00127277	NDUFB11P1,PGAM1P9,RP11-675M1.2,RPS3AP42,FAT3
11	41293375	41743040	Loss	0.0208064	RP11-124G5.1,RP11-124G5.2,RP11-63C8.1,RP11-124G5.3,RP11-375D13.2,LRRC4C
11	122615922	123034814	Loss	0.00127277	RNU4-23P,ATP5F1P5,BSX,RP11-335F8.2,RPL34P23,RPS26P43,RPL31P47,SNORD14E,SNORD14D,SNORD14C,RP11-762B21.5,CRTAM,HSPA8,C11orf63,CLMP,UBASH3B
21	32823400	33176022	Gain	0.0413305	AP000563.2,FBXW11P1,SOD1,SNORA81,AP000254.8,HMGN1P2,AP000255.6,AP000251.3,SCAF4,AP000253.1,TIAM1
3	132211994	132566246	Gain	0.0023226	ACAD11,ACKR4,HSPA8P19,DNAJC13,NPHP3,UBA5,NPHP3-AS1
20	32143601	32506595	Gain	0.00203077	RP1-63M2.6,C20orf144,ACTL10,RP1-63M2.5,E2F1,PXMP4,RP4-553F4.2,RPL31P2,TPM3P2,NECAB3,RP4-553F4.6,CHMP4B,CBFA2T2,ZNF341
1	220762911	221113051	Gain	0.00744067	HDAC1P2,RP11-322F10.2,C1orf115,RNU6ATAC35P,RP11-295M18.6,2-Mar,RP11-295M18.2,HLA-AS1,HLX,MARK1,1-Mar
13	114584284	114946858	Gain	0.0428052	LINC00454,LINC00565,RASA3-IT1,LINC00452,RASA3
19	28340295	28686261	Gain	0.0392257	CTC-459F4.8,AC005357.1,CTC-459F4.5,AC005758.1,AC022153.1,CTD-2043I16.1,CTC-459F4.3,LLNLF-65H9.1,CTC-459F4.7
2	193569241	193928986	Gain	0.0246357	RPS17P8,PCGEM1
5	136351988	136798441	Loss	0.0466735	SPOCK1
13	46844654	47197754	Gain	0.0307143	FAM206BP,LINC00563,RNU2-6P,RNU6-68P,OR7E101P,COX17P1,FKBP1AP3,LRRC63,KIAA0226L,PPP1R2P4,RP11-189B4.6,LRCH1
18	74282563	74708562	Loss	0.000191149	AC034110.1,AC139085.1,AC139085.2,RNU6-346P,RPL26P35,RP11-162A12.3,LINC00683,RP11-111H3.3,ARL2BPP1,RP11-162A12.2,RP11-862L9.3,LINC00908,ZNF236,MBP
1	200502570	200857773	Gain	0.00744067	RPL34P6,GPR25,DDX59,RP11-92G12.3,KIF14,CAMSAP2
13	66072168	66421444	Gain	0.0102245	HNRNPA3P5
20	31319841	31671888	Gain	0.00203077	RP5-1085F17.3,HDHD1P3,AL121756.1,DNMT3B,MAPRE1,RP5-1085F17.4,BPIFB2,BPIFB6,BPIFB3,BPIFB4,COMMD7,SUN5,EFCAB8
11	1230811	1672833	Loss	0.0295474	RP11-532E4.2,AC136297.1,TOLLIP-AS1,KRTAP5-2,KRTAP5-3,KRTAP5-4,KRTAP5-5,MUC5B,MOB2,DUSP8,KRTAP5-AS1,KRTAP5-1,TOLLIP,BRSK2
17	54412149	54776954	Gain	0.0451248	RP11-502F1.2,RPL39P33,NOG,ANKFN1
13	87317979	87677612	Gain	0.0150632	TXNL1P1,LINC00430
8	12917220	13356256	Loss	0.0433759	Y_RNA,RP11-10C8.2,MTND4P7,DLC1
18	68137622	68569577	Loss	0.00109434	RN7SL795P,GTSCR1
2	139395005	139759915	Gain	0.049089	RN7SKP286,YY1P2,AHCYP4,NXPH2
5	127905735	128250567	Gain	0.0413305	CTC-573M9.1,FBN2,SLC27A6
20	11473890	11826658	Gain	0.0184492	RP5-1128N12.2,PGAM3P,RP11-268G13.1,AL080274.1,RN7SKP111,RP5-1012F16.2,LINC00687
13	41043558	41394949	Gain	0.0216153	AL133318.1,RLIMP1,MIR320D1,MIR621,MRPS31,SLC25A15,LINC00598,FOXO1
11	77211137	77641465	Loss	0.00127277	RNU7-59P,AP002789.1,Y_RNA,RSF1-IT2,FTH1P16,RSF1-IT1,AP000580.1,RP11-91P24.1,RP11-91P24.3,AQP11,RP11-91P24.7,RP11-91P24.5,RP11-91P24.6,CLNS1A,RSF1,AAMDC,INTS4
2	150331753	150696628	Gain	0.0155531	RNU6-601P,MMADHC,AC007364.1,AC144449.1
13	43790913	44151571	Gain	0.0306693	RPL36P19,ENOX1-AS2,ENOX1-AS1,ENOX1
16	13525213	13956227	Loss	0.0230953	AC003009.2,U95743.1,U91319.1
18	67504885	67935194	Loss	0.00109434	CD226,RTTN,DOK6
11	58920669	59348379	Loss	7.4e-06	MPEG1,RN7SL42P,RP11-1036E20.10,SLC25A47P1,RP11-1036E20.7,RN7SL435P,OR5AN2P,OR5BR1P,OR5AN1,OR5BB1P,OR5A2,OR5A1,OR4D6,RP11-384C21.9,OR4D10,OR4D8P,RNU6-779P,OR4D11,OR4D9,OR4D7P,RNU7-58P,AP000442.4,FAM111A,DTX4,RP11-1036E20.9,OSBP
18	58242028	58674262	Loss	0.000328366	CTBP2P3,RP11-622J9.1,RP11-325K19.2,RP11-325K19.1
1	209164486	209530176	Gain	0.00616225	RP11-385M4.2,RP11-385M4.3,ATP5G2P1,RP11-372M18.1,RP11-385M4.1
3	176537366	176900850	Gain	0.000732976	MTND5P15,TBL1XR1-AS1,Y_RNA,RNU6-681P,RP11-644C3.1,TBL1XR1
11	40702356	41159118	Loss	0.0208064	AC104387.1,RNU6-365P,LRRC4C
11	88957047	89407390	Loss	0.000708023	CBX3P7,RP11-745I13.1,RP11-643G5.6,TYR,FOLH1B,NOX4
11	90203935	90604350	Loss	0.000708023	MIR4490,MIR1261,DISC1FP1
13	54079365	54421114	Gain	0.00291634	LINC00558
2	106152105	106479805	Gain	0.0496022	AC009505.2,NCK2
13	59889360	60226201	Gain	0.00450528	RNU7-88P
9	2443767	2778747	Gain	0.038105	RP11-91N2.3,VLDLR,KCNV2,RP11-125B21.2,KIAA0020
2	153553152	153889391	Gain	0.0155531	AC009969.1,UBQLN4P2,PRPF40A,ARL6IP6
11	110660305	111056615	Loss	0.000708023	RP11-97I14.1,RNA5SP350,RP11-89C3.3,RP11-89C3.4,RPS17P15,RP11-89C3.2
1	233086008	233425548	Gain	0.00308367	RPS7P3,NTPCR,PCNXL2
7	30071212	30412943	Gain	0.0218635	AC007036.4,AC007036.5,RPS27P16,AC007036.6,MIR550A1,AC006978.6,AC007285.7,MTURN,PLEKHA8,ZNRF2
18	37524197	37919807	Loss	0.000730685	RPL17P45,RP11-653G8.2
2	207696274	208039622	Gain	0.038105	MIR2355,KLF7-IT1,AC008269.2,CPO,AC007879.1,KLF7
9	136535484	136865089	Gain	0.0392257	AL590710.1,SARDH,VAV2
20	3464864	3803446	Gain	0.0377153	SF3A3P1,AL109805.1,GFRA4,SPEF1,CENPB,AP5S1,ADAM33,HSPA12B,C20orf27,CDC25B,ATRN,SIGLEC1
1	231358368	231702096	Gain	0.00308367	RNA5SP80,SNRPD2P2,RP11-295G20.2,C1orf131,GNPAT,EGLN1,TSNAX,EXOC8,SPRTN,TSNAX-DISC1
2	208910019	209248246	Gain	0.038105	RNA5SP116,AC093698.2,snoU13,CRYGEP,CRYGD,AC093698.4,AC016697.1,TPT1P2,AC016697.3,IDH1-AS1,AC016697.2,AC012362.3,AC012362.1,CRYGC,CRYGB,CRYGA,C2orf80,IDH1,PIKFYVE,PTH2R
9	75494008	75824801	Gain	0.0295474	CYP1D1P,ANXA1,ALDH1A1
7	25271648	25612982	Gain	0.0218635	U3,TSEN15P3,RP5-978I12.1,AC091705.1,AC091705.2,AC003985.1
17	58260371	58604460	Gain	0.0194264	SCARNA20,RP11-3K24.1,RP11-3K24.2,RPL12P38,RP11-15E18.5,C17orf64,RP11-15E18.1,USP32,APPBP2
19	34069166	34404756	Gain	0.047587	RPL21P131,KCTD15,CHST8
18	21926801	22322902	Loss	0.00207362	RP11-621L6.2,RP11-621L6.3,Y_RNA,RP11-178F10.1,RP11-178F10.2,RP11-178F10.3,RP11-178F10.4,RP11-449D8.2,RP11-449D8.3,HRH4,RP11-449D8.1,RAC1P1,OSBPL1A,RP11-449D8.5,IMPACT
1	214774523	215111693	Gain	0.00744067	ABHD17AP3,RP11-365D23.2,GAPDHP24,CENPF
17	54779265	55121067	Gain	0.0451248	RP11-670E13.2,RNU6-1158P,RP11-670E13.3,MIR3614,RP5-1107A17.2,RP5-1107A17.4,AC007114.1,C17orf67,TRIM25,RP11-670E13.5,COIL,RP5-1107A17.3,SCPEP1,DGKE
13	86299866	86637199	Gain	0.0150632	SLITRK6,MOB1AP1,RP11-30L8.1
1	207360998	207697830	Gain	0.011649	C4BPAP2,AL691452.1,RP11-6J21.2,CD55,CR2,CR1
5	136824662	137167984	Gain	0.0413305	AC106775.1,MIR874,RP11-381K20.5,HNRNPA0,RP11-381K20.4,NPY6R,RP11-381K20.2,KLHL3,SPOCK1
13	39529227	39867370	Gain	0.0306693	NXT1P1,STOML3,PROSER1,NHLRC3
18	24576252	24975902	Loss	0.00196906	RP11-26N15.2,UBA52P9,RP11-57J16.1,AQP4-AS1,CHST9,RP11-739N10.1
7	32854252	33190590	Gain	0.0227997	RP11-265E18.1,AC083863.5,RNU6-388P,AC074338.4,RN7SL505P,snoU13,AC074338.5,DPY19L1P2,KBTBD2,RP9P,NT5C3A,RP9,AVL9,FKBP9,BBS9
9	100161758	100497998	Gain	0.0040814	RP11-244N9.6,RP11-244N9.4,KRT18P13,AL445531.1,TDRD7,TSTD2,XPA,TMOD1,NCBP1
19	32028004	32364197	Gain	0.0248604	CTD-2050I18.1,RNA5SP471,RNU6-967P,AC011525.2,AC011525.4
5	179343730	179743193	Loss	0.0484222	RPS15AP18,CTC-563A5.4,CTC-563A5.2,MIR340,RP11-39H3.1,RP11-252I14.1,RP11-252I14.2,CTB-129O4.1,GFPT2,RNF130,RASGEF1C,MAPK9
1	219748819	220088046	Gain	0.00744067	ZC3H11B,AC096643.1,RNA5SP76,SLC30A10
1	154818353	155157070	Gain	0.0310969	PMVK,RP11-307C12.13,PYGO2,RP11-307C12.12,CKS1B,MIR4258,LENEP,RP11-307C12.11,Y_RNA,SLC50A1,DPM3,RNU7-150P,HMGN2P18,KRTCAP2,SHC1,FLAD1,ZBTB7B,DCST2,DCST1,ADAM15,EFNA4,EFNA1,RP11-201K10.3,TRIM46,KCNN3,PBXIP1,EFNA3,EFNA3
5	131251203	131580032	Gain	0.0413305	AC034228.3,AC034228.2,IL3,CSF2,snoZ6,AC063976.1,AC063976.2,AC063976.3,P4HA2-AS1,AC063976.7,AC034228.4,ACSL6,AC034228.7,P4HA2
9	113802620	114137566	Gain	0.0023226	RNY4P18,OR2K2,RP11-202G18.1,KIAA0368
17	66901215	67241482	Gain	0.0353679	LOC100421166,MIR4524B,ABCA8,ABCA9-AS1,ABCA5,ABCA9,ABCA10,ABCA6
11	88367675	88768333	Loss	0.00127277	GRM5
11	76420184	76805777	Loss	0.000389739	RP11-672A2.1,RP11-21L23.4,RP11-21L23.3,AP002498.1,B3GNT6,TSKU,RP11-21L23.2,ACER3,CTD-2547H18.1,CAPN5
18	7120241	7507983	Loss	0.00233746	SLC25A51P2,LRRC30,SNORA48
19	30768759	31135676	Loss	0.0325174	AC011478.1,ZNF536
18	72254868	72641611	Loss	0.000555643	LINC00909,ZNF407
11	93309502	93682868	Loss	0.00127277	RP11-178H8.3,Y_RNA,SCARNA9,SNORA25,SNORA32,SNORD6,SNORA1,SNORA8,SNORD5,SNORA18,MIR1304,SNORA40,snoU13,RN7SL195P,Y_RNA,TAF1D,C11orf54,MED17,VSTM5,KIAA1731
18	54400037	54773343	Loss	0.000328366	Y_RNA,RP11-383D22.1,U3,WDR7-OT1,LINC-ROR,WDR7
14	24881592	25248545	Loss	0.0430087	CBLN3,SDR39U1,RP11-80A15.1,CMA1,CTSG,GZMH,NYNRIN,RP11-104E19.1,GZMB,KHNYN
11	43561142	43934717	Loss	0.0208064	MIR670,MIR129-2,RP11-472I20.1,RP11-472I20.2,SEC14L1P1,MIR670HG,RP11-613D13.5,ALKBH3-AS1,HSD17B12,ALKBH3
11	90604926	90973772	Loss	0.000708023	OSBPL9P2,OSBPL9P3,RP11-699F16.2,DISC1FP1
18	76736062	77107934	Loss	0.000109635	RP11-849I19.1,CTD-2286N8.2,RP11-1136J12.1,SALL3,RP11-800A18.4,ATP9B
18	12812896	13182539	Loss	0.00238285	RP11-773H22.1,RP11-773H22.2,RP11-773H22.4,RP11-807E13.2,RP11-807E13.3,PTPN2,SEH1L,CEP192
19	29489042	29864580	Loss	0.0325174	RNA5SP470,CTD-2081K17.2,RN7SL340P,UQCRFS1,CTB-32O4.2,CTC-525D6.1
11	108462728	108843164	Loss	0.000708023	RPS2P39,RP11-801G16.2,CYCSP29,AP003027.1,EXPH5,DDX10
18	5584968	5958901	Loss	0.00515471	AP001032.1,MIR3976,TMEM200C,RP11-793A3.1,EPB41L3,RP11-945C19.1,RP11-945C19.4,L3MBTL4
18	51083969	51477720	Loss	9.78e-05	RP11-202D1.2,RPL29P32,RP11-671P2.1,RP11-202D1.3
18	1713348	2079800	Loss	0.00883085	CTD-2015H3.1,CTD-2533G20.1,CTD-2015H3.2,RP11-161I6.2
8	13755908	14140053	Loss	0.0433759	RP11-480O10.2,RP11-510I21.1,RP11-3G21.1,SGCZ
18	29841532	30225065	Loss	0.00744782	Y_RNA,HNRNPA1P7,AC021224.1,WBP11P1,AC009835.1,RP11-386P4.1,RP11-344B2.2,GAREM
10	59444867	59795023	Loss	0.0496022	RP11-448K10.1,MRPS35P3
20	50761816	51075767	Gain	0.000297863	RP4-583K8.1,ZFP64,RP4-723E3.1
18	11042752	11405067	Loss	0.00371171	RP11-93H10.1,RP11-128P17.4,RP11-128P17.2,PIEZO2
9	126333104	126656011	Gain	0.00710295	AL161790.1,RP11-417B4.3,PIGFP2,RP11-417B4.2,DENND1A
3	59221064	59539910	Gain	0.016494	RP11-285B24.1,RP11-719N22.1,RP11-719N22.2
13	20795889	21112469	Gain	0.0307936	GJB6,MIR4499,CRYL1
1	197072295	197388240	Gain	0.011649	RP11-32D17.4,RP11-332L8.1,MRPS21P3,ASPM,CRB1,ZBTB41
19	46566856	46930024	Loss	0.0413305	CTC-344H19.6,IGFL3,TGIF1P1,IGFL1P1,RPL12P41,AC006262.10,IGFL1,IGFL1P2,RNU6-924P,AC007193.9,AC007193.8,CCDC8,IGFL4,AC006262.4,AC006262.5,AC006262.6,HIF3A,AC007193.10,PPP5C,AC007193.6,IGFL2
10	106861852	107220809	Loss	0.0458959	SORCS3
20	47136001	47457014	Gain	0.000145464	AL035106.1,PREX1
20	6336002	6651608	Gain	0.0178397	CASC20
2	221447590	221762041	Gain	0.0198618	AC093843.1,AC067956.1
9	136133699	136446878	Gain	0.0392257	Y_RNA,LCN1P2,Y_RNA,MED22,RP11-244N20.7,SNORD24,SNORD36B,SNORD36A,SNORD36C,SURF1,SURF2,SLC2A6,ABO,SURF6,RPL7A,SURF4,C9orf96,REXO4,CACFD1,TMEM8C,ADAMTSL2,FAM163B,ADAMTS13
18	26556174	26918539	Loss	0.000390141	RNU6-408P,AC090349.1,AC105245.1,CTD-2515C13.1,CTD-2515C13.2
17	64267345	64588660	Gain	0.0353679	RN7SL735P,RP11-4F22.2,PRKCA
13	78891552	79217160	Gain	0.00684491	RNY3P3,RPL31P54,TCEB1P23,RP11-52L5.6,POU4F1,RNF219,RNF219-AS1
13	97192103	97508888	Gain	0.0428835	AMMECR1LP1,HS6ST3
9	89851715	90171438	Gain	0.018092	SNORA26,RP11-497K15.1,RP11-40C6.2,DAPK1-IT1,DAPK1
11	33248297	33602981	Loss	0.0349244	RP1-89D4.1,AL122015.1,RP1-130L23.1,RP1-305G21.1,HIPK3,KIAA1549L
7	23160134	23472618	Gain	0.0151315	AK3P3,AC005082.12,AC021876.4,SNORD65,AC005082.1,NUPL2,GPNMB,MALSU1,KLHL7,IGF2BP3
18	32074927	32435138	Loss	0.0107037	RP11-115P21.1,AC068506.1,RP11-138H11.1,DTNA
11	9471707	9822595	Loss	0.047587	AC132192.1,snoU13,RN7SL56P,RP11-16F15.1,RP11-16F15.4,RP11-16F15.2,RN7SKP50,RP11-540A21.2,ZNF143,WEE1,SWAP70,SBF2-AS1,SBF2
1	186247924	186573949	Gain	0.0207575	RNU6-1240P,AL596220.1,OCLM,RP11-295K2.3,GS1-304P7.3,GS1-304P7.1,PRG4,TPR,PDC,GS1-304P7.2,C1orf27
11	80928810	81292508	Loss	0.000708023	RP11-664H7.1,RP11-664H7.2
18	62556461	62910607	Loss	0.000328366	AC007631.1,AC007948.1
11	118575870	118931238	Loss	0.00127277	RP11-158I9.1,SETP16,Y_RNA,RP11-158I9.5,MIR4492,RN7SL688P,RP11-158I9.7,Y_RNA,RN7SL529P,RPL23AP64,RP11-110I1.11,RP11-110I1.5,RPS25,TRAPPC4,MIR3656,CXCR5,BCL9L,UPK2,FOXR1,RP11-110I1.12,SLC37A4,RP11-110I1.6,HYOU1,AP002954.4,DDX6,CCDC84
9	120707611	121031579	Gain	0.0109391	TPT1P9
11	40337459	40702355	Loss	0.047587	Y_RNA,AC090720.1,RP11-407P18.1,LRRC4C
17	36123527	36440483	Gain	0.0353679	RNU6-489P,RP11-1407O15.3,Y_RNA,AC091199.1,YWHAEP7,TBC1D3F,TBC1D3,RP11-1407O15.2
11	57526628	57889548	Loss	0.000389739	OR5BA1P,RP11-734C14.2,OR5AZ1P,OR5BD1P,CYCSP26,RNU6-899P,OR6Q1,VN2R9P,RP11-659P15.2,OR9L1P,OR9I3P,OR9I1,RP11-659P15.1,TMX2-CTNND1,RP11-691N7.6,CTNND1,OR9Q1
13	33802117	34123834	Gain	0.0149842	RP11-141M1.1,AL138999.1,STARD13-AS,STARD13,RP11-141M1.3
3	65248880	65567501	Gain	0.0415716	RP11-88H12.2,MAGI1
3	130999714	131320974	Gain	0.0023226	NUDT16P1,RP11-517B11.7,SNORA58,RP11-517B11.4,RP11-517B11.2,RP11-517B11.6,NUDT16,NEK11,MRPL3,CPNE4,RP11-933H2.4
13	74736393	75055943	Gain	0.00414403	RNY1P5,RPL21P108,LINC00402,AL355390.1,LINC00381
20	5398142	5723376	Gain	0.0123287	RP5-828H9.1,LINC00654,RP5-1022P6.7,RPS18P1,RP5-1022P6.5,RP5-1022P6.3,LINC00658,RP5-1022P6.4,GPCPD1
11	133785127	134137132	Loss	0.0001228	AP000911.1,RP11-713P17.5,PTP4A2P2,RP11-700F16.2,ACAD8,RP11-713P17.3,RP11-713P17.4,RP11-700F16.3,VPS26B,THYN1,IGSF9B,JAM3,NCAPD3
13	54425033	54700854	Gain	0.00291634	RP11-168P6.2,LINC00458,LINC00558
20	53020886	53305169	Gain	0.000977654	DOK5
1	182366278	182668438	Gain	0.011649	TEDDM1,LINC00272,TEDDM1P1,RGS16,RP11-317P15.4,RP11-317P15.5,RP1-223H12.5,RNASEL,RGS8,RGSL1
1	241766551	242062844	Gain	0.00381537	RP11-553N16.1,CHML,EXO1,OPN3,WDR64
13	58694868	58974919	Gain	0.00291634	LINC00374
20	6662678	6928532	Gain	0.0178397	RP5-859D4.3,snoR26,BMP2
19	32375148	32672694	Gain	0.0248604	AC011456.1,AC011518.1,AC011518.2,CTC-360P9.1,CTC-360P9.5,CTC-360P9.2,CTC-360P9.3,CTC-360P9.4
1	213371128	213666950	Gain	0.00381537	RPL31P13,RP11-554K11.2,RPS6KC1
9	138460445	138707727	Gain	0.0248604	RP11-98L5.4,RP11-98L5.5,LCN9,SOHLH1,RP11-98L5.2,GLT6D1,CAMSAP1,KCNT1
13	68670304	68915692	Gain	0.00450528	ELL2P3,HNRNPA1P18,RPL37P21
2	204228793	204494697	Gain	0.0198618	ABI2,RAPH1
1	162836982	163087387	Gain	0.0207575	RP11-331H2.3,RGS4,C1orf110,RGS5
1	207854704	208130905	Gain	0.011649	RP11-454L1.2,RP11-328D5.1,CD46,CD34,CR1L,C1orf132
20	54523163	54781816	Gain	0.000509244	RNA5SP487,CBLN4
2	192028543	192277370	Gain	0.0246357	HMGB1P27,RNU6-1045P,AC092614.2,MYO1B
20	9059792	9334520	Gain	0.0178397	PLCB4
2	222166281	222471012	Gain	0.0198618	AC079834.2,TMEM256P2,CTD-2308L22.1,AC079834.1,EPHA4
5	176493263	176776652	Gain	0.0415716	CTD-2301A4.3,CTD-2301A4.5,RAB24,PRELID1,RN7SL562P,CTD-2301A4.1,ZNF346,FGFR4,MXD3,LMAN2,NSD1
13	100277144	100582833	Gain	0.0430045	MIR4306,CLYBL-AS2,CLYBL-AS1,SNORA25,snoU13,CLYBL
20	54875532	55162444	Gain	0.000509244	RPL39P,AL121914.1,snoU13,AL109806.1,FAM209B,FAM210B,AURKA,CSTF1,CASS4,GCNT7,FAM209A,RP5-843L14.1,RTFDC1
2	190321429	190571312	Gain	0.0246357	AC013439.4,ASNSD1,WDR75,SLC40A1,ANKAR
9	109078912	109352947	Gain	0.0040814	RP11-540H22.2,RP11-308N19.1
7	136485096	136751061	Gain	0.0499872	snoU13,MIR490,KRT8P51,hsa-mir-490,CHRM2
2	190045628	190321150	Gain	0.0246357	KRT18P19,AC118063.1,WDR75
1	176840059	177145364	Gain	0.0207575	MIR488,ASTN1,BRINP2
2	188549041	188803621	Gain	0.0123434	AC068718.1,ST13P2,LINC01090
13	113011260	113262045	Gain	0.0428052	SPACA7,TUBGCP3
9	117456140	117758148	Gain	0.0040814	RP11-402G3.4,AL390240.1,RP11-78H18.2,TNFSF15,TNFSF8
9	103144291	103452056	Gain	0.0040814	AL353805.1,MURC,RN7SKP87,MSANTD3,MSANTD3-TMEFF1,TMEFF1
5	133164056	133432861	Gain	0.0413305	snoU13,CTB-113I20.2,CTB-113I20.1,CTD-2131I18.1,VDAC1,C5orf15
5	142561294	142872509	Gain	0.0413305	RPL7P21,ARHGAP26-IT1,CTD-2050E21.1,NR3C1,ARHGAP26
1	235063871	235326579	Gain	0.00308367	RP11-443B7.3,RP4-597N16.1,RP4-597N16.4,SNORA14B,RP11-443B7.2,RP11-443B7.1,RBM34,TOMM20,ARID4B
5	141212207	141475177	Gain	0.0413305	AC005740.3,AC005740.6,AC005740.4,PCDH1,KIAA0141,PCDH12,RNF14,AC005740.5,GNPDA1
20	2205941	2516388	Gain	0.0270241	Y_RNA,SNRPB,SNORD119,TGM3,TGM6,RP4-734P14.4,ZNF343
9	95647838	95935292	Gain	0.0109391	SNX18P2,RP11-274J16.5,RP11-370F5.4,ANKRD19P,RP11-526D8.7,FGD3,SUSD3,C9orf89,NINJ1,ALOX15P2
2	179963276	180209322	Gain	0.0123434	snoU13,AC093911.1,SESTD1
2	188241953	188548309	Gain	0.0123434	GAPDHP59,AC007319.1,CALCRL,TFPI
2	106742178	106994240	Gain	0.0496022	AC018878.3,AC092106.2,AC092106.1,AC114755.2,AC114755.4,AC114755.3,AC114755.5,UXS1,AC114755.7
21	18049541	18355562	Gain	0.0413305	RNU1-98P,AP000473.6,AF212831.2
2	102735706	103039742	Gain	0.0496022	AC007248.6,AC007248.7,AC007271.3,IL1RL2,IL1RL1,IL18R1,IL18RAP,IL1R1
9	123807538	124056427	Gain	0.0109391	RN7SL181P,RP11-477J21.2,RAB14,RP11-477J21.6,GSN-AS1,CNTRL,GSN,C5
13	72386379	72656239	Gain	0.00414403	RPL35AP31,RPS10P21,RNA5SP32,DACH1
9	128987481	129242671	Gain	0.0109391	RP11-343J18.1,NRON,SNORD116,MVB12B
21	34028116	34290943	Gain	0.0413305	AP000281.1,SNORA70,AP000281.2,PAXBP1-AS1,PAXBP1,C21orf62,SYNJ1,C21orf49,AP000282.2
13	71864811	72176752	Gain	0.00414403	RABEPKP1,DACH1
1	187341808	187606050	Gain	0.0207575	RP11-445P19.3,RP11-445P19.2,RP11-393M18.1,FDPSP1,LINC01037
17	66058921	66352355	Gain	0.0235086	LOC732538,SH3GL1P3,RP11-147L13.7,RP11-147L13.8,LOC440461,RP11-147L13.2,AMZ2,AC145343.2,LINC00674,LRRC37A16P,SLC16A6,ARSG
20	39627038	39876604	Gain	0.000586425	RNU2-52P,RP3-511B24.5,RPL23AP81,RP1-1J6.2,PLCG1,RP3-511B24.6,TOP1,ZHX3
2	152182095	152466324	Gain	0.0155531	MIR4773-2,RN7SL124P,TNFAIP6,RIF1,NEB
21	36375317	36661638	Gain	0.0413305	AF015262.2,RUNX1
20	12919861	13197802	Gain	0.0262133	RP11-157E14.1,RP4-718P11.1,RP5-1069C8.2,SPTLC3
1	229922597	230183333	Gain	0.0179843	RP11-552D4.1,RP11-286M16.1
5	132465201	132742126	Gain	0.0413305	CTB-49A3.1,CTB-49A3.5,CTB-3M24.3,CTB-49A3.4,CTB-49A3.2,FSTL4
1	228956247	229254402	Gain	0.0179843	RP4-799G3.2,ISCA1P2,RP5-1065P14.2
3	124969593	125255477	Gain	0.0122297	DUTP1,RP11-775J23.2,RNU6-232P,snoU13,Y_RNA,Y_RNA,SLC12A8,ZNF148,SNX4,OSBPL11
5	132743874	133009269	Gain	0.0413305	MIR1289-2,AC005195.1,FSTL4
2	103985378	104246132	Gain	0.0496022	AC092568.1,AC018880.1,AC018880.2
20	56771169	57046685	Gain	0.000346926	ANKRD60,PPP4R1L,APCDD1L,RAB22A,VAPB
1	185914774	186167932	Gain	0.011649	GS1-174L6.4,HMCN1
5	127627830	127888093	Gain	0.0413305	Y_RNA,FBN2,SLC27A6
17	28952029	29225285	Gain	0.0412326	SH3GL1P2,LRRC37BP1,RN7SL316P,CTD-2349P21.6,CTD-2349P21.5,CTD-2349P21.10,CTD-2349P21.9,CTD-2349P21.1,RNU6-298P,RP13-753N3.1,ATAD5,CTD-2349P21.11,AC005562.1,SUZ12P,CRLF3,TEFM
13	25711096	25972479	Gain	0.0428052	AL359757.1,AMER2-AS1,RPL23AP69,AL590787.1,RP11-271M24.2,TCEB2P1,AMER2,LINC01053,LINC01076,NUPL1,MTMR6,ATP8A2
5	128303407	128577385	Gain	0.0413305	MIR4633,ISOC1,SLC27A6
17	66352356	66642694	Gain	0.0235086	MIR635,AC079210.1,PRKAR1A,RP11-120M18.5,ARSG,RP11-120M18.2,WIPI1,FAM20A,RP11-118B18.1
5	128630593	128881009	Gain	0.0413305	MIR4460,ADAMTS19-AS1,ADAMTS19,CTC-575N7.1
3	127149772	127420340	Gain	0.0040814	RP11-59J16.2,AC023593.1,ABTB1,RP11-59J16.1,TPRA1,MCM2,PODXL2,MGLL
2	119952446	120247852	Gain	0.0496022	STEAP3-AS1,STEAP3,DBI,SCTR,AC013275.2,C2orf76,TMEM37
5	148569683	148819291	Gain	0.0413305	PCYOX1L,RP11-394O4.3,AC131025.8,MIR143,MIR145,AFAP1L1,GRPEL2,GRPEL2-AS1,MIR143HG,ABLIM3,RP11-331K21.1,AC012613.2,IL17B
2	197302393	197610702	Gain	0.015695	SCARNA16,CCDC150,HECW2
1	178276885	178532010	Gain	0.0207575	RP4-765C7.2,RP4-593C16.3,LINC00083,C1orf220,C1ORF220,RNA5SP69,TEX35,RASAL2
20	7805645	8085071	Gain	0.0262133	RP5-836E8.1,PHKBP1,RP5-971N18.3,HAO1,TMX4
13	93348178	93634590	Gain	0.0216849	GPC5-AS1,GPC5
5	168704148	168958482	Gain	0.0230953	SLIT3
13	94607113	94906616	Gain	0.0216849	RNA5SP35,GPC6-AS1,GPC6
9	93951548	94210211	Gain	0.018092	RP11-305L7.7,RP11-440G5.2,NFIL3,AUH
5	168406697	168700920	Gain	0.0230953	CTB-174D11.2,MIR585,CTB-174D11.1,SLIT3
13	81815865	82063792	Gain	0.0149901	RNU6-77P,HIGD1AP2,RP11-452B18.2
13	81327737	81597179	Gain	0.0149901	ARF4P4
17	61280415	61526078	Gain	0.0298204	RP11-269G24.8,RP11-269G24.7,RP11-269G24.4,RP11-269G24.2,CYB561,TANC2,AC037445.1,AC015923.1,RP11-269G24.3
13	93813754	94075103	Gain	0.0216849	SNORD22,HNRNPA1P29,GPC6
17	60317580	60580394	Gain	0.0298204	RP11-51L5.4,RP11-51L5.5,RP11-51L5.1,RP11-51L5.2,RNU7-52P,RPS23P7,RP11-51L5.3,TBC1D3P2,RP11-51L5.7,EFCAB3,METTL2A,TLK2
17	59872405	60122323	Gain	0.0298204	Y_RNA,RN7SL800P,AC018628.1,Y_RNA,INTS2,MED13,BRIP1
17	62407140	62688429	Gain	0.0298204	MILR1,AC138744.2,DDX5,MIR3064,MIR5047,AC009994.2,RP11-87N3.6,POLG2,CEP95,SMURF2
7	2649264	2929426	Gain	0.0230702	AC006028.11,TTYH3,IQCE,AMZ1,GNA12
1	215135753	215415364	Gain	0.00744067	KCNK2
3	172177697	172461347	Gain	0.0013101	AC007919.18,SLC31A1P1,AC007919.2,AC007919.1,AC007919.19,RNU6-547P,RP11-408H1.3,TNFSF10,NCEH1
7	36502795	36751853	Gain	0.032006	AOAH-IT1,AC087069.1,AC006960.7,AOAH
13	35634598	35911777	Gain	0.0149842	SCAND3P1,PHBP13,NBEA
13	32044914	32343892	Gain	0.0216153	RXFP2
3	165257641	165509350	Gain	0.0013101	RP11-85M11.2,BCHE
13	46119800	46407442	Gain	0.0216367	RNA5SP27,TIMM9P3,COX4I1P2,LINC01055,AKR1B1P4,SPERT,SIAH3,FAM194B
2	165598514	165853973	Gain	0.00961489	AC019181.2,RNA5SP110,RNA5SP111,SLC38A11,AC013463.2,COBLL1
5	135244496	135496799	Gain	0.0230953	VTRNA2-1,SMAD5-AS1,GS1-39E22.1,SMAD5,TGFBI,LECT2,FBXL21
2	163760674	164061075	Gain	0.00961489	RPL7P61
2	164061076	164366757	Gain	0.00961489	RNU6-627P
9	71127724	71425043	Gain	0.0295474	RP11-274B18.2,RP11-274B18.3,FAM122A,RP11-203L2.3,TMEM252,PGM5,RP11-274B18.4,PIP5K1B
1	211228022	211474960	Gain	0.00616225	KCNH1-IT1,RP11-543B16.1,RP11-543B16.3,RP11-543B16.2,AC092017.1,RCOR3,KCNH1
20	50411543	50682211	Gain	0.000297863	RNU6-347P,RNU7-6P,RN7SL603P,SALL4,RP5-1112F19.2,ZFP64
13	28392773	28650810	Gain	0.00953436	RNU6-73P,PDX1,ATP5EP2,LINC00543,RN7SL272P,KATNBL1P1,CDX2,URAD,FLT3,PDX1-AS1
13	34904832	35195625	Gain	0.0149842	GAMTP2,RP11-16D22.2,LINC00457,RP11-266E6.3
5	170175066	170483192	Gain	0.0230953	RN7SL623P,MIR4454,GABRP,CTC-455F18.3,RANBP17
17	65328999	65576147	Gain	0.0353679	snoU13,RN7SL756P,MIR548AA2,CTD-2653B5.1,PSMD12,PITPNC1,Y_RNA
7	35213416	35522862	Gain	0.0442581	AC009531.2,DPY19L2P1,TBX20
7	33423961	33694980	Gain	0.032006	BBS9
9	88445707	88752740	Gain	0.018092	PHBP7,RP11-213G2.5,RP11-379P1.4,RP11-213G2.3,GOLM1,NAA35
7	1246906	1540543	Gain	0.0323309	UNCX,AC073094.4,AC102953.4,RP11-1246C19.1,MICALL2,INTS1
1	150782797	151062311	Gain	0.0458959	RNU6-1309P,RP11-235D19.2,Y_RNA,CYCSP51,RP11-316M1.12,RNU6-884P,C1orf56,MLLT11,ARNT,SETDB1,CERS2,RP11-316M1.3,ANXA9,FAM63A,BNIPL,CDC42SE1,GABPB2,PRUNE
1	216700789	216965807	Gain	0.00744067	ESRRG
13	95617411	95920458	Gain	0.0307143	RNU6-62P,snoU13,ABCC4
9	127245412	127529251	Gain	0.018092	RP11-10J18.3,RP11-164H5.1,RN7SL302P,MIR181A2,MIR181B2,NR5A1,MIR181A2HG,NR6A1
1	247177957	247485887	Gain	0.00744067	RP11-551G24.3,RP11-551G24.2,RP11-107G24.3,C1orf229,FGFR3P6,RP11-488L18.6,RP11-488L18.3,RP11-488L18.10,MIR3916,RNA5SP82,RP11-488L18.1,VN1R17P,VN1R5,Y_RNA,ZNF669,MIR3916,RP11-488L18.8,ZNF670,ZNF124,ZNF496
1	203928376	204216410	Gain	0.00744067	AC096645.1,LINC00303,RP11-74C13.4,RP11-203F10.1,ETNK2,RP11-74C13.3,REN,KISS1,GOLT1A,SOX13,PLEKHA6
1	247499491	247807326	Gain	0.00744067	OR2B11,OR2W5,GCSAML-AS1,OR2C3,OR2G2,OR2G3,RNU6-691P,OR14L1P,RP11-978I15.10,NLRP3,GCSAML,RP11-634B7.4
19	28340295	28686261	Loss	0.0325174	CTC-459F4.8,AC005357.1,CTC-459F4.5,AC005758.1,AC022153.1,CTD-2043I16.1,CTC-459F4.3,LLNLF-65H9.1,CTC-459F4.7
7	25017962	25271647	Gain	0.0309077	CYCS,AC004129.7,AC004129.9,NPVF,C7orf31,OSBPL3
3	166073921	166378015	Gain	0.00653884	RP11-450H5.1,RP11-450H5.4
20	48739167	49021519	Gain	0.000145464	RP11-112L6.3,RP11-112L6.2,RP11-290F20.2,RP11-112L6.4,CEBPB,RP11-290F20.1,TMEM189-UBE2V1,TMEM189,RP11-290F20.3
1	244098260	244356268	Gain	0.00744067	AL590483.1,RN7SL148P,RP11-278H7.3,ZBTB18,RP11-278H7.4,RP11-278H7.1
17	25757875	26017404	Gain	0.0458959	RP11-720N19.2,ITM2BP1,RP11-19P22.8,RP11-19P22.5,RP11-19P22.7,RP11-19P22.10,RP11-19P22.6,RP11-19P22.2,RP11-19P22.3,TBC1D3P5,RP11-720N19.1,LGALS9,NOS2P1,KSR1,AC015688.3
19	29875849	30126535	Gain	0.00653884	CTC-525D6.5,VSTM2B,POP4,CTC-525D6.1,CTC-525D6.2
20	44178179	44475919	Gain	0.000145464	RNA5SP485,CCNB1IP1P2,WFDC10A,MIR3617,HNRNPA1P3,SPINT5P,RNU6ATAC38P,UBE2C,TNNC2,WFDC8,WFDC9,RPS2P7,WFDC11,WFDC10B,WFDC13,SPINT4,WFDC3,SNX21,ACOT8,DNTTIP1
9	114137567	114434069	Gain	0.0023226	RNA5SP294,RP11-16L21.7,PTGR1,LRRC37A5P,KIAA0368,DNAJC25,DNAJC25-GNG10,GNG10,ZNF483
1	223953471	224204935	Gain	0.00744067	PHBP11,ACTBP11,CICP5,RP11-504P24.8,RNU6-1319P,RP11-504P24.2,RP11-504P24.3,RP11-504P24.4,RP11-504P24.6,CAPN2,TP53BP2
17	57567552	57859130	Gain	0.0451248	RNU4-13P,CLTC,PTRH2,RP11-567L7.6,VMP1,DHX40
17	59169175	59444365	Gain	0.0451248	RP11-136H19.1,RP11-332H18.5,BCAS3
13	46577960	46844283	Gain	0.0307143	RN7SL288P,snoU13,RN7SKP5,FAM206BP,LCP1,ZC3H13,CPB2-AS1,CPB2,LRRC63
1	243765862	244057199	Gain	0.00744067	FABP7P1,AKT3-IT1,RP11-370K11.1,AKT3
7	25612983	25905241	Gain	0.0151315	CTA-242H14.1,AC003090.1
1	153219410	153493614	Gain	0.0458959	LOR,RNU6-160P,S100A9,S100A12,AL591704.5,S100A8,AL591704.7,S100A7A,AL591704.9,S100A7L2,S100A7,RN7SL44P,PGLYRP3,PGLYRP4
9	72536236	72828580	Gain	0.047587	RNU2-5P,SMC5-AS1,MAMDC2,MAMDC2-AS1
7	7595285	7886450	Gain	0.0230702	RP5-1007H16.1,GS1-165B14.2,AC007161.5,RPL23AP51,MIOS,RP5-1159O4.1,RPA3,RPA3-AS1
17	43199764	43485791	Gain	0.0451248	HEXIM1,HEXIM2,RP13-890H12.2,CTD-2020K17.3,CTD-2020K17.4,RNA5SP443,CTB-39G8.2,CTB-39G8.3,PLCD3,ACBD4,AC002117.1,CTD-2020K17.1,FMNL1,MAP3K14-AS1,SPATA32,ARHGAP27,MAP3K14
7	22097476	22385660	Gain	0.0151315	RNA5SP227,RAPGEF5
7	15743772	16020299	Gain	0.0151315	AC006041.1
1	174498995	174762322	Gain	0.0310969	BANF1P4,RABGAP1L
2	141848911	142126388	Gain	0.049089	RNU6-904P,AC068287.1,LRP1B
1	228497183	228802765	Gain	0.0310969	RP11-245P10.6,RP11-245P10.8,RP11-245P10.4,TRIM17,HIST3H3,RP5-915N17.3,HIST3H2A,HIST3H2BB,MIR4666A,HIST3H2BA,RNF187,BTNL10,RNA5SP19,RNA5S1,RNA5S2,RNA5S3,RNA5S4,RNA5S5,RNA5S6,RNA5S7,RNA5S8,RNA5S9,RNA5S10,RNA5S11,RNA5S12,RNA5S13,RNA5S14,RNA5S15,RNA5S16,RNA5S17,RNA5SP18,SNORA51,DUSP5P1,OBSCN,TRIM11
1	224790611	225070052	Gain	0.0136602	RP11-100E13.1,RP11-100E13.3,RP11-3L21.2,AL596330.1,RP11-449J1.1,CNIH3
3	177508622	177767569	Gain	0.000732976	RP11-2L8.1,RP11-2L8.2,RNU6-1120P,RP11-91K9.1
3	188683033	188937250	Gain	0.000732976	RP11-297K7.1,TPRG1
2	99928335	100214410	Gain	0.0314804	RP11-527J8.1,AC018690.1,TXNDC9,REV1,C2orf15,EIF5B,AFF3
9	4100237	4349212	Gain	0.038105	RP11-358M14.2,GLIS3
19	34406926	34692586	Gain	0.047587	RN7SL150P,RPS4XP23,RPS4XP20,RPS4XP21,CHCHD2P3,LSM14A
13	49409344	49671214	Gain	0.00685872	AL161421.1,RNU6-60P,RAD17P2,RNY3P2,FNDC3A
20	61065195	61322018	Gain	9.78e-05	RP13-379O24.2,MIR1-1,MIR133A2,RPL7P3,WI2-87327B8.1,RP13-30A9.1,RP13-30A9.2,RP11-93B14.6,RP11-93B14.5,C20orf166-AS1,C20orf166,SLCO4A1
7	12186212	12437545	Gain	0.0218635	TMEM106B,VWDE
2	146683518	146982802	Gain	0.049089	RNU7-2P,RPL17P12,AC062031.1
3	141387115	141648607	Gain	0.0013101	TPT1P3,RP11-144C9.1,AC112504.1,HMGN2P25,RNU6-509P,ATP1B3-AS1,RNF7,GRK7,ATP1B3,RP11-340E6.1
18	4081441	4426423	Loss	0.00233746	DLGAP1-AS5,DLGAP1
3	186056555	186318613	Gain	0.000732976	RP11-78H24.1,RP11-48F14.2,CRYGS,RP11-48F14.1,TBCCD1,DNAJB11,DGKG
9	3785160	4058429	Gain	0.038105	RP11-252M18.3,GLIS3-AS1,GLIS3
7	26227777	26488740	Gain	0.0151315	AC010677.5,AC004540.4,HNRNPA2B1,CBX3,SNX10,AC004540.5
13	63295314	63553646	Gain	0.0102245	LINC00448
2	86784929	87055175	Gain	0.049089	AC015971.1,AC015971.2,RNF103,RMND5A,CD8B,CHMP3,RNF103-CHMP3,CD8A
9	74104809	74354889	Gain	0.0295474	RPL35AP21,TMEM2
9	71425224	71733668	Gain	0.0295474	RNU6-820P,PRKACG,RP11-265B8.5,RP11-203L2.4,PIP5K1B,FXN
13	52409237	52693316	Gain	0.00450528	CCDC70,CTAGE3P,FABP5P2,UTP14C,ALG11,ATP7B,NEK5
2	120891970	121161401	Gain	0.0496022	Y_RNA,AC012363.7,AC012363.8,MTND3P10,AC012363.10,MTND4P26,MTND5P28,INHBB,AC012363.4,RALB,AC012363.13,EPB41L5,TMEM185B
20	4463845	4742776	Gain	0.012802	RPL7AL2,RPS4XP2,PRND,RP5-1068H6.1,PRNP,RP5-1164C1.2,PRNT
5	127905735	128250567	Loss	0.0404556	CTC-573M9.1,FBN2,SLC27A6
19	28686262	28941373	Gain	0.0392257	AC093074.1,CTB-70G10.1,AC005307.1,AC005780.1,AC005307.3
13	92134219	92392695	Gain	0.0102944	GPC5
9	16914152	17165698	Gain	0.0314804	RN7SL720P,RP11-132E11.3,RP11-132E11.4,RP11-132E11.2,CNTLN
2	169497129	169753638	Gain	0.0314804	CERS6-AS1,NOSTRIN,CERS6,SPC25
9	138116717	138395543	Gain	0.0392257	RP11-399H11.2,AL390778.1,C9orf62,RP11-555H7.2,SOCS5P2,C9orf116,RP11-399H11.3,PPP1R26-AS1,PPP1R26,MRPS2,RP11-426A6.5
7	22842319	23149937	Gain	0.0151315	AC005682.5,SNORD93,AC005682.7,KLHL7-AS1,TOMM7,AC005682.6,FAM126A,AC005682.8,KLHL7
13	54785149	55056430	Gain	0.00451093	RPL13AP25
3	197281339	197538677	Gain	0.000188269	AC132008.1,RP11-496H1.2,AC024560.2,MIR922,RP11-803P9.1,AC024560.3,RP11-496H1.1,KIAA0226,FYTTD1,BDH1,LRCH3
9	140023307	140319648	Gain	0.0392257	LRRC26,RP11-350O14.18,MIR3621,ANAPC2,TPRN,NDOR1,C9orf169,RNF224,SLC34A3,TUBB4B,FAM166A,C9orf173,TOR4A,RP13-122B23.9,RP13-122B23.8,NRARP,snoU13,NOXA1,GRIN1,TMEM210,SSNA1,TMEM203,NELFB,RNF208,EXD3
13	31725374	32011166	Gain	0.0216153	ANKRD26P4,HSPH1,B3GALTL
9	116089588	116389289	Gain	0.0023226	HDHD3,POLE3,RP11-168K11.3,WDR31,ALAD,C9orf43,RP11-168K11.2,BSPRY,RGS3
2	208040505	208334095	Gain	0.038105	AC007879.4,AC007879.3,MIR1302-4,AC007879.1,AC007879.2,AC007879.7,AC007879.6,AC007879.5
3	120520130	120817039	Gain	0.0208064	NAP1L1P3,RP11-500K19.2,MIR5682,RP11-500K19.1,STXBP5L
7	22385887	22676860	Gain	0.0151315	AC099759.1,EEF1A1P6,AC002480.4,AC002480.3,RAPGEF5,STEAP1B,AC002480.5
3	147576140	147882566	Gain	0.0013101	AC092925.1,AC092958.1,RP11-639B1.1,RP11-501O2.1,RP11-501O2.3,RP11-71N10.1
13	51857726	52125528	Gain	0.00684491	MIR5693,RP11-24B19.4,RPS4XP16,RN7SL320P,SNRPGP11,FAM124A,SERPINE3,INTS6,RP11-24B19.3,INTS6-AS1
3	148313132	148591408	Gain	0.0013101	RPL38P1,HMGB1P30,AGTR1,CPB1,CPA3,RP11-680B3.2
20	36068389	36324206	Gain	0.0011115	RPL7AP14,NNAT,PPIAP3,GLRXP,LINC00489,BLCAP,RP4-640H8.2,CTNNBL1
9	18102689	18405141	Gain	0.038105	RP11-570H19.2
13	35301110	35561296	Gain	0.0102129	RP11-307O13.1,NBEA
1	242331083	242628099	Gain	0.00468996	RN7SKP12,RP11-513D4.3,RP11-513D4.2,RP11-513D4.1,RP11-561I11.3,PLD5,RP11-561I11.4
3	143482066	143746350	Gain	0.0013101	RP11-8J23.1,C3orf58,SLC9A9
13	102824662	103080052	Gain	0.0218635	RPL39P29,FGF14-AS2,RP11-811P12.3,FGF14-IT1,FGF14-AS1,FGF14
19	33022456	33283777	Gain	0.0295474	PDCD5,SNORA68,RPS12P31,RN7SL789P,RGS9BP,CTD-2538C1.2,NUDT19,CTD-2538C1.3,ANKRD27,CTC-379B2.4,TDRD12
9	23625467	23881167	Gain	0.038105	SUMO2P2,RP11-315I14.2,RP11-315I14.5,RP11-321L2.1,ELAVL2
13	40610749	40869227	Gain	0.0216153	LINC00332,RPL17P51,RNY3P9
3	170750058	171015827	Gain	0.0023226	MIR569,TNIK
20	3803447	4104509	Gain	0.0377153	AP5S1,RP11-119B16.2,MIR103A2,FTLP3,RPL21P2,RP11-352D3.2,MAVS,PANK2,SMOX,RNF24
3	126745296	127026059	Gain	0.00710295	C3orf56,Y_RNA,RP11-305F5.2,RNU6-1047P,RP11-88I21.1,PLXNA1
7	31822881	32059324	Gain	0.0227997	AC006377.1,SNX2P2,PDE1C
20	37003300	37225397	Gain	0.000586425	SNORA71B,SNORA71A,SNORA71C,SNORA71D,SNORA71,SNORA60,MIR548O2,RPS3P2,ADIG,LBP,RP4-564F22.5,SNHG17,SNHG11,RALGAPB
2	224169312	224392194	Gain	0.0314804	HIGD1AP4,AC013448.1,AC013448.2
20	34828609	35073343	Gain	0.000586425	AAR2,DLGAP4
7	6201259	6427897	Gain	0.0218635	Y_RNA,Y_RNA,FAM220A,RAC1,CYTH3
2	200293238	200500530	Gain	0.0246357	SATB2-AS1,AC093590.1,SATB2
13	52195002	52409236	Gain	0.00684491	DHRS12,RP11-327P2.5,WDFY2
13	51624282	51851121	Gain	0.00684491	RPL5P31,SLMO2P2,LINC00371,FAM124A,GUCY1B2
1	195801362	196014664	Gain	0.011649	RP11-476B1.1
1	161963376	162195738	Gain	0.0207575	RP11-227F8.2,MIR4654,OLFML2B,NOS1AP
1	162196499	162417107	Gain	0.0310969	RP11-565P22.2,RNA5SP61,MIR556,C1orf111,SLAMF6P1,RP11-565P22.6,C1orf226,SH2D1B,NOS1AP
13	67730037	67954880	Gain	0.00684491	RPSAP53,LINC00364,PCDH9
2	170548743	170757172	Gain	0.0198618	SNORA51,PTCHD3P2,AC009967.3,U3,PHOSPHO2,KLHL23,METTL5,CCDC173,SSB,UBR3
13	56746836	56957652	Gain	0.00684491	SPATA2P1
2	225675148	225899031	Gain	0.0314804	MIR4439,DOCK10
1	213037244	213253700	Gain	0.00381537	FLVCR1,VASH2,ANGEL2,RPS6KC1
3	77812727	78019747	Gain	0.0415716	RNU6-217P,AC134729.1
3	173632871	173872233	Gain	0.0013101	RN7SKP234,NLGN1-AS1,NLGN1
5	179110851	179342959	Gain	0.0415716	LTC4S,MGAT4B,MIR1229,RN7SKP150,Y_RNA,CTC-241N9.1,CANX,HMGB3P22,SQSTM1,C5orf45,MAML1,RNF130,TBC1D9B
3	173878101	174116775	Gain	0.0013101	RP11-393N4.1,RP11-393N4.2,NLGN1
3	156465429	156705859	Gain	0.0013101	PA2G4P4,KLF3P2,LINC00886,LEKR1
2	167153789	167377766	Gain	0.0314804	snoU13,SCN7A,AC010127.3,SCN9A
3	149988284	150218614	Gain	0.0013101	RP11-483E7.1,TSC22D2
9	114637494	114844798	Gain	0.0013101	MIR4668,RNU6-710P,RP11-4O1.2,UGCG,SUSD1
20	53414539	53644367	Gain	0.000509244	RNU4ATAC7P
1	182813641	183023695	Gain	0.011649	HMGN1P4,RNA5SP71,RP11-505O17.1,KRT18P28,AL450304.1,RNU6-41P,SHCBP1L,DHX9,LAMC1
1	209532042	209750058	Gain	0.00189251	MIR205HG,RP11-372M18.2,RP1-272L16.1
3	76646013	76886070	Gain	0.0415716	ROBO2
1	235976652	236203280	Gain	0.00189251	LYST-AS1,MIR1537,RNU5E-2P,RNU6-968P,RP5-940F7.2,RP4-580N22.2,NID1,LYST
17	36849977	37055077	Gain	0.0235086	MIR4734,CTB-58E17.1,CTB-58E17.3,CTB-58E17.9,MIR4726,AC006449.1,CISD3,RNA5SP440,CTB-58E17.5,RNU6-866P,MIR4727,RPL23,SNORA21,SNORA21,RPS20P35,MLLT6,PCGF2,PSMB3,PIP4K2B,C17orf98,LASP1,CWC25
9	123574947	123795508	Gain	0.0109391	RP11-27I1.6,PHF19,TRAF1,PSMD5,PSMD5-AS1,C5
20	9403480	9612418	Gain	0.0377153	RP5-986I17.2,RP5-1119D9.4,LAMP5,PAK7,PLCB4
20	34224037	34455657	Gain	0.0011115	RN7SKP271,RNU6-759P,ROMO1,snoU13,RNU6-1166P,COX7BP2,Y_RNA,CPNE1,RP1-309K20.6,RBM12,NFS1,RBM39,RPF2P1,PHF20
17	36599406	36821044	Gain	0.0235086	AC124789.1,CTB-58E17.2,RN7SL102P,ARHGAP23,SRCIN1
9	121422262	121653076	Gain	0.0109391	TUBB4BP6,RP11-349E4.1,RP11-127L21.1
13	32490931	32725611	Gain	0.0216153	LINC01073,FRY-AS1,FRY,EEF1DP3
9	79427051	79666914	Gain	0.0295474	RP11-159H20.1,RP11-159H20.2,RP11-159H20.3,FOXB2,ATP5J2P3,PRUNE2
13	41424805	41648572	Gain	0.0216153	CYCSP34,RGS17P1,SUGT1P3,WBP4,TPTE2P5,ELF1
9	96126104	96362047	Gain	0.0109391	RNU6-829P,Y_RNA,RP11-165J3.5,RP11-165J3.6,FAM120AOS,AL353629.1,FAM120A,PHF2
9	18465178	18671466	Gain	0.038105	MIR3152,RN7SKP258,ADAMTSL1
17	80024535	80264593	Gain	0.0279113	snoU13,RP11-1376P16.2,RP11-1376P16.1,RP13-516M14.2,AC132872.1,RP13-516M14.1,FASN,RP13-516M14.4,CCDC57,SLC16A3,CSNK1D,AC132872.2
3	136392225	136617553	Gain	0.0023226	RNU6-789P,RP11-102M11.1,RP11-102M11.2,RP11-731C17.2,RP11-731C17.1,SLC35G2,NCK1,RP11-85F14.5,STAG1
9	37442516	37659365	Gain	0.038105	RN7SL463P,RP11-405L18.2,RP11-405L18.4,RP11-613M10.6,RAB1C,ZBTB5,FBXO10,RP11-613M10.8,TOMM5,FRMPD1,POLR1E,RP11-613M10.9
1	201914264	202127826	Gain	0.00233178	SNORA70,RP11-465N4.2,RP11-465N4.5,RP11-465N4.4,RP11-510N19.2,RP11-510N19.3,CRIP1P3,LMOD1,TIMM17A,RNPEP,GPR37L1,PTPN7,ELF3,RP11-510N19.5,ARL8A
13	63556791	63769604	Gain	0.0102245	LINC00376
20	976104	1193684	Gain	0.0377153	ACTG1P3,C20orf202,RSPO4,PSMF1,TMEM74B
9	83229420	83462838	Gain	0.0295474	AL353707.1,RPS19P6
9	127529252	127751073	Gain	0.0109391	WDR38,RPL35,RNU4-82P,AL354928.1,RP11-474P12.3,OLFML2A,ARPC5L,NR6A1,RP11-175D17.3,GOLGA1,SCAI
1	180034341	180258758	Gain	0.0207575	QSOX1,RP5-1180C10.2,CEP350,RP11-502H18.2,LHX4,ACBD6
11	38398957	38741646	Loss	0.0208064	RP11-63D14.1,RP11-64I17.1,RP11-277K23.1
17	80654232	80874102	Gain	0.0412326	RP11-388C12.1,RP11-388C12.8,AC068014.1,AC068014.2,RP11-567O16.1,RAB40B,FN3KRP,RP11-388C12.5,FN3K,ZNF750,TBCD
13	58051241	58272123	Gain	0.00451093	PCDH17
9	75286179	75493101	Gain	0.0295474	RP11-28P17.3,RP11-151D14.1,TMC1
13	56356311	56579413	Gain	0.00451093	HNF4GP1
13	86758588	86983992	Gain	0.0102944	DDX6P2
17	76794050	77033648	Gain	0.0412326	RPL9P29,RP11-323N12.5,CTD-2373H9.5,TIMP2,DDC8,LGALS3BP,CANT1,C1QTNF1-AS1,C1QTNF1,USP36
17	76558774	76794049	Gain	0.0412326	RNU6-638P,CTD-2357A8.3,CYTH1,USP36,DNAH17
3	181232278	181453988	Gain	0.000732976	RP11-4B14.3,SOX2,SOX2-OT
13	76071027	76281652	Gain	0.00291528	RP11-173B14.4,FAM204CP,COMMD6,RP11-173B14.5,UCHL3,RP11-29G8.3,LMO7
20	33199768	33422832	Gain	0.00203077	RP11-346K17.3,HMGB3P1,PIGU,NCOA6,TP53INP2
1	204452699	204693035	Gain	0.00744067	RP11-430C7.2,RNA5SP74,RP11-430C7.4,RP11-430C7.5,AL161793.1,RP11-23I7.1,RNA5SP75,PIK3C2B,MDM4,LRRN2
2	221927866	222166280	Gain	0.0198618	AC011233.2
1	245940821	246158490	Gain	0.00744067	SMYD3
1	245329981	245545008	Gain	0.00744067	DNAJC19P8,AL359983.1,RP11-62I21.1,KIF26B
1	245112521	245329980	Gain	0.00744067	RNU6-947P,RP11-156E8.1,RNU6-1089P,RNU6-999P,RP11-290P14.2,RNU1-132P,EFCAB2,KIF26B
1	230951859	231174431	Gain	0.00639857	RNA5SP79,RP5-858B6.1,RN7SL837P,snoU13,AL844165.1,MIR1182,RP11-423F24.3,C1orf198,RP5-858B6.3,ARV1,FAM89A,TTC13
20	24260602	24476103	Gain	0.0307143	GAPDHP53,RP4-564O4.1,RP11-526K17.2,SYNDIG1
3	57877881	58120652	Gain	0.0325174	PPIAP16,SLMAP,FLNB
1	223301167	223510376	Gain	0.00744067	RP11-239E10.2,RP11-239E10.3,TLR5,SUSD4
1	188584274	188793472	Gain	0.0207575	RP11-669M2.2,RPS3AP9,RP11-316I3.1
1	243559324	243765861	Gain	0.00744067	RP11-269F20.1,SDCCAG8,AKT3
20	35761494	35982888	Gain	0.00203077	RP3-343K2.4,RPN2,GHRH,MANBAL,SRC,MROH8
13	25049278	25269193	Gain	0.0307143	AL359538.2,PSPC1P2,AL359538.1,ATP12A,PARP4,TPTE2P6,RP11-556N21.1
13	40242371	40451631	Gain	0.0306693	RNY4P14,CDKN2AIPNLP3,AZU1P1,SNORD116,COG6
13	39875792	40116928	Gain	0.0306693	snoU13,LHFP
1	193233677	193475878	Gain	0.011649	LINC01031
13	37465550	37704054	Gain	0.0306693	LAMTOR3P1,RPL29P28,EIF4A1P5,EXOSC8,AL138706.1,CSNK1A1L,ALG5,SMAD9,SUPT20H
3	129091024	129312988	Gain	0.0040814	SNORA7B,RN7SL752P,EFCAB12,MBD4,RHO,H1FOO,PLXND1,RP11-529F4.1,RPL32P3,IFT122
5	134235318	134474556	Gain	0.0413305	CTB-36O1.7,MTND6P4,MTND5P11,MTND4P12,MIR4461,MIR4461,CTB-36O1.3,CTC-276P9.1,PCBD2,CATSPER3,PITX1,CTC-276P9.2,CTC-276P9.3,C5orf66,TXNDC15
13	44158054	44399501	Gain	0.0306693	RP11-168P13.1,CCDC122,ENOX1
1	214305864	214514360	Gain	0.00744067	SMYD2
1	174076677	174292271	Gain	0.0207575	snoU13,RP11-160H22.5,RABGAP1L
9	102853879	103076161	Gain	0.0040814	RN7SL75P,RPS2P35,RP11-29B11.5,NANOGP5,TEX10,INVS,ERP44
9	120028347	120260120	Gain	0.0109391	RN7SKP125,RP11-388N2.1,ASTN2
1	204741232	204956325	Gain	0.00744067	SNORD112,RP11-494K3.2,NFASC
13	71375102	71580557	Gain	0.00414403	SOGA2P1
1	233425549	233631560	Gain	0.00497144	RP5-862P8.3,RNU4-77P,MLK4,PCNXL2
17	64631557	64866456	Gain	0.0353679	RNU6-928P,RNA5SP445,AC006947.1,MIR634,PRKCA,CACNG5
20	58607007	58824988	Gain	0.000673974	C20orf197,CDH26,RP5-1043L13.1
11	10976163	11318441	Loss	0.047587	RP11-179A10.3,MTND5P21,CTD-3224I3.3,RP11-179A10.2,RP11-179A10.1,GALNT18
2	147900547	148105515	Gain	0.049089	snoU13
20	43256330	43497185	Gain	0.000145464	KCNK15,RP11-445H22.3,RP11-445H22.4,WISP2,ADA,RIMS4
20	51242286	51459376	Gain	0.000297863	RP4-715N11.2,RP4-723E3.1
2	103539432	103762221	Gain	0.0496022	AC108051.2,AC108051.1,AC108051.3,AC073987.1
2	196939555	197175981	Gain	0.015695	snoU13,AC020571.3,RN7SL820P,RP11-347P5.1,STK17B,HECW2
2	155015748	155222870	Gain	0.0155531	AC009297.1,PHBP4,GALNT13
20	5723377	5939726	Gain	0.0184492	RNU1-55P,RP5-967N21.2,TRMT6,MCM8,C20orf196,CHGB
20	46418021	46633143	Gain	0.000145464	RNU7-173P,SRMP1,RNA5SP486,RNU7-92P,RP11-347D21.2,RP11-347D21.1,RP11-347D21.3,RP11-347D21.4
2	223854255	224069499	Gain	0.0198618	KCNE4
19	33563127	33788842	Gain	0.047587	AC008738.2,CTD-2540B15.13,CTD-2540B15.6,CTD-2540B15.12,GPATCH1,WDR88,CTD-2540B15.10,SLC7A10,LRP3
7	5402606	5631264	Gain	0.0151315	AC093620.5,AC092171.2,RP11-1275H24.2,RP11-1275H24.1,RP11-1275H24.3,AC092171.4,snoU13,MIR589,AC006483.1,CTB-161C1.1,AC006483.5,ACTB,TNRC18,FBXL18
7	4821746	5031771	Gain	0.0151315	MIR4656,Y_RNA,AC092610.12,AP5Z1,PAPOLB,RNF216P1,RADIL,MMD2,RBAK-RBAKDN
2	151908949	152117779	Gain	0.0155531	FABP5P10,AC018731.3,RBM43
1	228215378	228423936	Gain	0.0179843	MIR3620,C1orf35,FAM96AP2,RP11-520H14.1,GUK1,IBA57-AS1,ARF1,MRPL55,GJC2,IBA57,C1orf145,WNT3A,OBSCN
13	33554955	33798641	Gain	0.0149842	AL161898.1,KL,STARD13-IT1,STARD13
2	177813868	178040694	Gain	0.0123434	RNA5SP112,AC079305.8,AC079305.11
7	35665348	35894737	Gain	0.0442581	RP11-379H18.1,AC007551.2,AC007551.1,HERPUD2,AC018647.3,AC007551.3,7-Sep
17	56105033	56336675	Gain	0.0451248	RP11-159D12.10,OR4D1,MSX2P1,OR4D2,DYNLL2,EPX,MKS1,LPO
20	61438601	61666805	Gain	9.78e-05	DPH3P1,ARF4P2,BHLHE23,LINC00029,OGFR,COL9A3,DIDO1,GID8,SLC17A9,RP11-305P22.9,TCFL5
2	82509090	82726994	Gain	0.049089	Y_RNA,AC010105.1
20	41399414	41613071	Gain	0.000297863	RP4-753D4.2,PTPRT
9	128592201	128797550	Gain	0.018092	PBX3
7	30884439	31112118	Gain	0.0159988	FAM188B,GHRHR,ADCYAP1R1,INMT-FAM188B,AQP1,AQP1
1	229591409	229808492	Gain	0.0179843	RP4-613A2.1,RNA5SP78,HMGN2P19,ABCB10,RNU4-21P,TAF5L,URB2,NUP133
2	141627089	141832338	Gain	0.049089	Y_RNA,AC010740.1,LRP1B
13	90462471	90695736	Gain	0.0150632	RPL7L1P1,SNORD38,PEX12P1
19	42811716	43054813	Gain	0.047587	CTB-50E14.4,RNU4-60P,CTB-50E14.5,PRR19,TMEM145,CNFN,LIPE,CXCL17,CEACAM1,MEGF8,LIPE-AS1
9	89643821	89851714	Gain	0.018092	RP11-276H19.4,C9orf170,RP11-276H19.2
20	46633144	46845066	Gain	0.000297863	SNORD36
20	60533715	60772864	Gain	0.000202502	RP11-11M20.2,hsa-mir-3195,PSMA7,LSM14B,SS18L1,MTG2,TAF4
7	5035085	5255411	Gain	0.0151315	RP11-730B22.1,OR10AH1P,RNU6-215P,RNF216P1,RBAK,ZNF890P,RBAK-RBAKDN,RBAKDN,WIPI2
19	33285657	33490685	Gain	0.018092	CTD-2085J24.5,CTD-2085J24.3,RN7SKP22,CTD-2085J24.4,RPL31P60,C19orf40,SLC7A9,TDRD12,CEP89,RHPN2
2	209791679	209999355	Gain	0.0198618	HSPA8P6
2	213978527	214183753	Gain	0.0198618	RP11-105N14.1,AC079610.2,RP11-105N14.3,RP11-105N14.2,IKZF2,SPAG16
1	229356926	229591408	Gain	0.0179843	TMEM78,RP5-1061H20.4,RP5-1061H20.3,SPHAR,RNU6-180P,RN7SKP276,RP5-1068B5.1,ACTA1,RP5-1068B5.3,RP5-1061H20.5,RAB4A,RP4-803J11.2,CCSAP,NUP133
13	87686737	87918493	Gain	0.0150632	UBBP5
11	71981972	72294042	Loss	0.00011479	AP000593.7,RP11-45F15.1,AP005019.3,AP005019.4,RP11-169D4.1,AP000593.6,RP11-45F15.2,RP11-7N14.1,CLPB,PDE2A
11	46229266	46543524	Loss	0.0208064	CTD-2589M5.5,MIR4688,MDK,CHRM4,RP11-425L10.1,MIR3160-1,RP11-702F3.4,CTD-2589M5.4,CREB3L1,DGKZ,AMBRA1
18	52934347	53272160	Loss	0.000328366	MIR4529,RP11-619L19.2,RP11-619L19.1,TCF4
11	129878232	130191145	Loss	0.000406968	RP11-567M21.3,TCEB2P2,RP11-679I18.4,AP003041.1,RPL34P21,RP11-567O18.1,DDX18P5,Metazoa_SRP,AP003041.2,APLP2,ST14,RP11-121M22.1,ZBTB44
18	26092639	26404771	Loss	0.000415237	ARIH2P1,RP11-510D21.1,RP11-510D21.2
11	117536136	117861571	Loss	0.00127277	RP11-35P15.1,RP11-728F11.3,RP11-728F11.4,FXYD2,FXYD6,TMPRSS13,IL10RA,FXYD6-FXYD2,DSCAML1
11	68028254	68367006	Loss	0.00011479	C11orf24,NDUFA3P2,AP000807.2,AP000807.1,PPP6R3,LRP5
18	49786526	50126636	Loss	0.000171912	RP11-25O3.1,DCC
18	41325315	41639086	Loss	0.00141182	RNU6-443P,AC083760.1
8	19355818	19667559	Loss	0.0433759	RP11-1105O14.1,CSGALNACT1
18	60614398	60931310	Loss	0.000328366	RP11-299P2.1,snoU13,PHLPP1,BCL2
11	86040664	86374123	Loss	0.00127277	PTP4A1P6,C11orf73,CCDC81,RP11-317J19.1,ME3
11	87875223	88194998	Loss	0.00127277	MIR3166,GAPDHP70,RAB38,CTSC
11	62497962	62838068	Loss	6.15e-05	POLR2G,RP11-727F15.11,TMEM179B,RP11-727F15.13,RNU6-118P,RN7SL119P,RP11-727F15.9,RNU2-2P,RN7SL259P,RP11-959F10.4,RP11-959F10.5,TTC9C,TAF6L,TMEM223,RP11-727F15.12,NXF1,STX5,WDR74,SNHG1,CHRM1,AP000438.2,SLC22A6,SLC22A8,ZBTB3,SLC3A2
14	23916306	24240684	Loss	0.0430087	THTPA,JPH4,RP11-388E23.2,BRD7P1,RP11-388E23.4,NGDN,ZFHX2,AP1G2,RP11-66N24.3,DHRS2,RP11-66N24.4
18	31762208	32074926	Loss	0.0069134	RP11-379L18.1,DTNA,NOL4
11	127399031	127729267	Loss	0.00127277	RP11-822P1.1
8	13356257	13673869	Loss	0.0433759	RNA5SP255,C8orf48,RP11-145O15.2,RP11-436P7.1,RP11-436P7.2,RP11-145O15.3,DLC1
18	73660954	73974941	Loss	0.000328366	RP11-357H3.1,RP11-94B19.6,RP11-94B19.2,RP11-94B19.7,RP11-94B19.3,RP11-94B19.4,RP11-1O2.1,RP11-94B19.5,RP11-94B19.1
11	108944821	109279967	Loss	0.000708023	RNA5SP349,SNORD39,RP11-708B6.2
19	32028004	32364197	Loss	0.0325174	CTD-2050I18.1,RNA5SP471,RNU6-967P,AC011525.2,AC011525.4
11	84574040	84904157	Loss	0.000389739	AP000857.2,HNRNPCP6,AP000857.3,DLG2
18	7508561	7831265	Loss	0.00207362	AP000897.1,RP11-678G15.2,RP11-678G15.1,PTPRM
18	47486896	47827388	Loss	0.000362336	ADAD1P2,RP11-689E3.2,RN7SL310P,MBD1,CXXC1,RP11-813F20.4,CCDC11,MYO5B
18	49358194	49671741	Loss	0.000328366	RPS8P3
18	64608877	64941776	Loss	0.00109434	RNU6-1037P,AC113195.1,MIR5011,RPL31P9
11	30833718	31167539	Loss	0.047587	DCDC1
11	56627905	56940534	Loss	0.000708023	OR5AK3P,OR5AK2,OR5AK1P,OR5BQ1P,OR5AK4P,OR5AO1P,OR5BP1P,AP000479.1
18	61784954	62110066	Loss	0.000555643	LINC00305,AC100848.1,RP11-909B2.1,RP11-146N18.1
18	33081161	33416936	Loss	0.00281285	RP11-712P20.2,RP11-873E20.1,GALNT1
18	12300136	12613124	Loss	0.00378103	RNU6-170P,RNU7-129P,AP001029.1,RP11-861E21.2,RP11-861E21.3,snoU13,AFG3L2,SLMO1,RP11-861E21.1,TUBB6,SPIRE1
11	57013248	57352561	Loss	0.0001228	RP11-872D17.4,snoU13,AP000781.1,PRG2,RNA5SP341,RN7SKP259,RP11-624G17.3,Y_RNA,TIMM10,TNKS1BP1,SSRP1,P2RX3,RP11-872D17.8,SLC43A3,RTN4RL2,SMTNL1,UBE2L6,RPS4XP13,PRG3,SLC43A1
18	60933626	61252474	Loss	0.000328366	RP11-635N19.2,RP11-635N19.3,ATP5G1P6,RP11-28F1.2,KDSR,RP11-635N19.1,SERPINB5,SERPINB12,VPS4B,BCL2
11	84904158	85233250	Loss	0.000708023	RP11-882I15.1,RNU6-1292P,RP11-482L11.1,DLG2
18	71918843	72238730	Loss	0.000555643	FAUP1,RP11-231E4.2,RP11-231E4.3,C18orf63,FAM69C,CNDP2,CYB5A,CNDP1
18	67021819	67346439	Loss	0.000608407	RP11-465I4.3,RP11-465I4.2,DOK6
16	13053029	13362847	Loss	0.0128084	AC092380.1,AC009134.1,SHISA9,U91319.1
11	105003673	105328807	Loss	0.000708023	CARD18,OR2AL1P,RP11-94P11.3,RP11-94P11.4
13	42071353	42245842	Gain	0.0428052	MIR5006,VWA8
3	141188400	141376139	Gain	0.0013101	KRT18P35,RASA2-IT1,YWHAQP6,RASA2
2	99203378	99403794	Gain	0.0314804	UNC50,YWHAQP5,RNU4-84P,MGAT4A,AC109826.1,INPP4A,COA5
7	3033609	3196569	Gain	0.0218635	RN7SKP130,AC024028.1,AC091801.1,CARD11
2	95533274	95715965	Gain	0.0314804	TEKT4,AC097374.3,AC097374.4,RPS24P6,AC103563.2,AC103563.3,AC103563.4,AC103563.5,AC103563.6,AC103563.7,RN7SL575P,AC103563.8,MAL,AC097374.2
3	141648608	141817743	Gain	0.0013101	RP11-271K21.11,RP11-343B5.1,TFDP2
2	148631535	148829702	Gain	0.0155531	RNU6-1275P,AC009480.3,AC009480.1,ACVR2A,ORC4,MBD5
9	75044591	75202644	Gain	0.0295474	RP11-217F16.1,RP11-313E4.1,snoU13,TMC1
3	89196645	89367682	Gain	0.0234456	EPHA3
3	165030679	165212503	Gain	0.0013101	RP11-85M11.2
13	90695737	90884271	Gain	0.0102944	RNA5SP34,FAR1P1,KRT18P27,MIR622,LINC00559
18	75026672	75328409	Loss	0.000191149	SNORA25,BDP1P,RP11-176N18.2
11	4885031	5184546	Loss	0.0295474	OR51H2P,OR51T1,OR51A6P,OR51A7,OR51G2,OR51G1,OR51A3P,OR51A4,OR51A2,OR51A5P,OR51L1,OR51P1P,OR52J2P,OR52J3,OR52E2,OR52E1,OR52E1,OR52S1P,OR52E3P,OR52J1P,OR52A5,AC113331.9,OR52A4,OR52A1,MMP26
1	209765388	209930693	Gain	0.011649	MIR4260,G0S2,ADORA2BP,CAMK1G,LAMB3,HSD11B1,TRAF3IP3,RP1-28O10.1
13	85070002	85273222	Gain	0.0150632	MTND4P1,MTND5P3,LINC00333
3	169008325	169171618	Gain	0.0023226	RP11-641D5.2,MECOM
18	34600448	34903859	Loss	0.00141182	RP11-95O2.5,RP11-797E24.3,RP11-95O2.1,CELF4,KIAA1328
20	18346194	18524691	Gain	0.0145338	LINC00851,GCNT1P1,RNA5SP476,MIR3192,RPL21P3,RBBP9,RPS19P1,DZANK1,POLR3F,SEC23B
11	44632899	44915348	Loss	0.0208064	RPL34P22,RP11-45A12.1,CD82,RP11-45A12.2,TSPAN18,TP53I11
1	230745278	230947421	Gain	0.0179843	RP11-543E8.2,AGT,RN7SL467P,RP11-99J16__A.2,CAPN9,COG2
7	7158645	7353070	Gain	0.0218635	RP4-733B9.1,AC079448.1,AC005532.5,C1GALT1
3	179580262	179773492	Gain	0.000732976	PEX5L-AS1,PEX5L-AS2,PEX5L
5	149477551	149669756	Gain	0.0413305	Y_RNA,CSF1R,PDGFRB,SLC6A7,CAMK2A,CDX1
18	21391035	21692286	Loss	0.00233746	AC010754.1,RP11-403A21.1,RP11-403A21.2,RP11-403A21.3,LAMA3,TTC39C
1	177968616	178127040	Gain	0.0207575	RASAL2-AS1,RP4-798P15.3,RP11-568K15.1,RASAL2
1	177766695	177968615	Gain	0.0207575	SEC16B,RP4-798P15.3
9	135880469	136080535	Gain	0.0392257	EEF1A1P5,CELP,snoU13,CEL,RALGDS,GBGT1,GTF3C5
9	126756641	126943981	Gain	0.00710295	RP11-85O21.2,RP11-85O21.4,RP11-85O21.5,LHX2
2	103356892	103528310	Gain	0.049089	AC007251.2,TMEM182
5	150000146	150159922	Gain	0.0413305	CTC-345K18.2,SYNPO,MYOZ3,DCTN4,SMIM3,AC010441.1,RBM22
3	135699878	135889795	Gain	0.0023226	RP11-305O4.3,TDGF1P6,RP11-305O4.2,MSL2,PPP2R3A
18	9287340	9568315	Loss	0.00233746	RP11-61L19.2,RP11-61L19.1,RNU2-27P,RP11-61L19.3,RP11-888D10.3,TWSG1,RALBP1,PPP4R1
11	78530721	78815951	Loss	0.00131499	AP002958.1,CTD-2337I7.1,TENM4
7	26703565	26871964	Gain	0.0218635	SKAP2
2	95341700	95533273	Gain	0.049089	CNN2P11,AC073464.4,CNN2P8,AC073464.6,CYP4F32P,AC073464.7,SNX18P14,RNU6-1320P,AC073464.11,ANKRD20A8P,AC097374.2
13	92578731	92753852	Gain	0.0102944	RNU4ATAC3P,GPC5
13	92392696	92572317	Gain	0.0102944	GPC5
13	88292925	88496840	Gain	0.0150632	LINC00397,RP11-471M2.3,SLITRK5,MIR4500HG
9	114857261	115058305	Gain	0.0013101	RNU6-855P,Y_RNA,RP11-165N19.2,RN7SL57P,RNA5SP295,RN7SL430P,HSPE1P28,SUSD1,PTBP3
7	28310590	28506516	Gain	0.0218635	AC005017.2,CREB5
7	28508094	28708421	Gain	0.0218635	AC005105.2,CREB5
20	48279932	48480398	Gain	0.000145464	RN7SL197P,SNRPFP1,RNU6-919P,RNU7-72P,B4GALT5,RP5-1041C10.3,SLC9A8
13	21160492	21336674	Gain	0.0307143	SLC35E1P1,RNU2-7P,AL161772.1,AL512652.1,RANP8,IL17D,N6AMT2,IFT88
20	32798515	32972078	Gain	0.00203077	XPOTP1,RP4-785G19.2,CTD-3216D2.5,CTD-3216D2.4,Y_RNA,ASIP,RP4-785G19.5,AHCY,ITCH
1	179753797	179925538	Gain	0.0207575	RP11-12M5.3,RP11-12M5.4,IFRG15,RP11-533E19.7,RN7SL230P,RP11-533E19.5,FAM163A,TOR1AIP1,RP11-533E19.2,TOR1AIP2,CEP350
17	27638357	27831800	Gain	0.0412326	RPL35AP35,RNU4-34P,MIR4523,RNU6-711P,RNU6-1034P,RP11-296K13.4,MIR4523,TAOK1
20	23653882	23836123	Gain	0.0309077	CST4,CST2P1,CST1,XXyac-YX60D10.1,CST2
13	39098914	39292699	Gain	0.0306693	LINC00366,PRDX3P3,LINC00437,FREM2
7	1778308	1954300	Gain	0.0230702	AC074389.9,AC074389.1,MIR4655,ELFN1,AC110781.3,MAD1L1
1	235525253	235701552	Gain	0.00189251	RP11-382D8.5,RPS21P1,MTND6P14,MTND5P19,TBCE-AS1,RP4-534P7.2,TBCE,B3GALNT2
2	187316458	187494852	Gain	0.0123434	DPRXP1,AC018867.1,AC018867.2,ZC3H15,ITGAV
13	104043975	104220591	Gain	0.0309077	RP11-123H22.1,ATP6V1G1P7
1	210095673	210291309	Gain	0.00616225	SYT14
13	69791694	69985731	Gain	0.00684222	SRSF1P1,LINC00401,LINC00383
17	38067020	38261209	Gain	0.0154219	GSDMB,ORMDL3,LRRC3C,RP11-387H17.6,CSF3,SNORD124,RP11-387H17.4,GSDMA,MED24,THRA,NR1D1,PSMD3
13	69208374	69370044	Gain	0.00684222	RPS3AP52,RPL12P34,RN7SL761P
7	1575377	1768000	Gain	0.0230702	AC093734.1,PSMG3,AC074389.5,AC074389.7,AC074389.6,TMEM184A,PSMG3-AS1,TFAMP1,ELFN1,MAFK
21	33333332	33507803	Gain	0.0413305	HUNK-AS1,HUNK,LINC00159
20	23402775	23576821	Gain	0.0230702	CSTL1,CST11,Y_RNA,CST12P,CST8,RP3-333B15.4,CST9LP1,CST9L,RP11-218C14.2,CST13P
19	32798466	32973618	Gain	0.0109391	AC007773.1,AC007773.3,ZNF507,AC007773.2,DPY19L3
1	231174432	231356301	Gain	0.00639857	RP5-1097F14.1,RP5-1097F14.3,FAM89A,TRIM67
1	211479237	211646264	Gain	0.00639857	SNX25P1,RP11-318L16.6,RCOR3,TRAF5,LINC00467,ARPC3P2
20	31680334	31872983	Gain	0.00203077	SOCS2P1,RP11-49G10.3,BPIFA3,AL121901.1,BPIFA1,RPL12P3,BPIFB4,BPIFA2,BPIFA4P,BPIFB1
13	47198156	47374717	Gain	0.0307143	ESD,LRCH1
13	46407443	46577959	Gain	0.0307143	SIAH3,ZC3H13
17	33084070	33262382	Gain	0.0154219	RP11-642M2.1,CCT6B
20	57136138	57295088	Gain	0.000346926	RP5-907D15.3,MGC4294,RP11-261P9.4,AL050327.1,STX16,APCDD1L-AS1,STX16-NPEPL1,NPEPL1
13	29584512	29756369	Gain	0.00684222	MTUS2
9	105328166	105487844	Gain	0.0109391	ZYG11AP1,LINC00587
13	103132157	103328086	Gain	0.0309077	LINC00555,TPP2
10	103556652	103857128	Loss	0.0412326	Y_RNA,RP11-302K17.3,RP11-302K17.4,KCNIP2-AS1,KCNIP2,HPS6,MGEA5,C10orf76
5	176493263	176776652	Loss	0.0484222	CTD-2301A4.3,CTD-2301A4.5,RAB24,PRELID1,RN7SL562P,CTD-2301A4.1,ZNF346,FGFR4,MXD3,LMAN2,NSD1
20	32514061	32692280	Gain	0.00203077	PIGPP3,RP5-1125A11.1,RP5-1125A11.4,RP1-64K7.4,EIF2S2,RALY,MIR4755
13	102443290	102624418	Gain	0.0309077	HMGB3P7,MIR2681,FGF14
13	74519275	74686283	Gain	0.00626668	KLF12
13	24851040	25049148	Gain	0.0307143	C1QTNF9-AS1,AL359736.1,NUS1P3,LINC00566,CYCSP33,C1QTNF9,RP11-307N16.6,SPATA13,PARP4,TPTE2P6
11	63774301	64064726	Loss	0.00011479	RP11-21A7A.4,RP11-21A7A.3,TRPT1,RP11-783K16.14,DNAJC4,VEGFB,FKBP2,RP11-783K16.5,RP11-783K16.13,Y_RNA,FLRT1,FERMT3,NUDT22,PPP1R14B,PLCB3,BAD,GPR137,KCNK4,RP11-783K16.10,MACROD1,RP11-21A7A.2,STIP1
2	145743610	145931406	Gain	0.049089	TEX41
19	33889369	34065833	Gain	0.047587	CTD-2329C7.2,PEPD
21	35715718	35907175	Gain	0.0413305	KCNE2,AP000320.6,C21orf140,CMP21-97G8.1,AP000322.53,CMP21-97G8.2,SNORA11,SMIM11,KCNE1,RCAN1,AP000320.7
3	177314409	177508621	Gain	0.00226554	SNORA18,RP11-114M1.1,RP11-114M1.2,LINC00578
9	129242672	129441517	Gain	0.018092	RP11-205K6.1,RP11-205K6.2,AL356309.1,AL161908.1,RP11-123K19.2,LMX1B,MVB12B,RP11-123K19.1
3	136204437	136392224	Gain	0.0023226	RNY4P4,HMGN1P10,RNU7-198P,STAG1
2	181352501	181536659	Gain	0.0123434	AC009478.2,AC009478.1
5	134831235	135029703	Gain	0.0413305	NEUROG1,CXCL14,CTC-321K16.1,CTC-321K16.4
9	119369192	119572217	Gain	0.0109391	TRIM32,ASTN2
13	57024915	57204534	Gain	0.00685872	snoU13
7	14730796	14933428	Gain	0.0102944	AC006150.2,AC006150.1,DGKB
18	76426055	76731826	Loss	0.000109635	RP11-715C4.1,CTD-2382H12.1,CTD-2382H12.2
2	165247718	165428591	Gain	0.0155531	AC110086.1,GRB14
1	206789794	206961466	Gain	0.00468996	RP11-343H5.6,SNORD112,RP11-343H5.4,Y_RNA,IL10,MAPKAPK2,DYRK3
2	139217998	139387710	Gain	0.049089	RP11-231E19.1,AC114763.1,AC092620.3,AC097721.2,SPOPL,AC092620.2
1	188793473	188967944	Gain	0.0207575	RP11-316I3.2,LINC01035
13	21424404	21597714	Gain	0.0428835	HNRNPA1P30,PPIAP27,RPSAP54,snoU13,RNU6-51P,LATS2-AS1,XPO4,CNOT4P1,LATS2
11	116098315	116402750	Loss	0.000708023	snoU13,AP001891.1
2	179296482	179476151	Gain	0.0123434	AC009948.7,RP11-65L3.4,RP11-65L3.2,RP11-171I2.5,RP11-171I2.2,AC009948.5,DFNB59,FKBP7,PLEKHA3,TTN-AS1,TTN,PRKRA
1	166262124	166456386	Gain	0.0310969	RP11-479J7.2,RP11-479J7.1,FMO7P,RP11-276E17.2
13	36148057	36311118	Gain	0.0306693	LINC00445,NBEA
13	65877596	66067452	Gain	0.00684491	STARP1
2	171805870	171976294	Gain	0.0123434	GORASP2,TLK1
13	67527659	67694693	Gain	0.00684491	PCDH9-AS3,PCDH9-AS4,PCDH9
17	58869356	59034421	Gain	0.0298204	KRT18P61,AC079005.1,HMGN1P28,RN7SL448P,BCAS3
13	48690927	48886829	Gain	0.00685872	POLR2KP2,ITM2B,LINC00441,RB1
20	58424753	58603617	Gain	0.000673974	RNU7-141P,PPP1R3D,FAM217B,SYCP2,CDH26
17	60122324	60317579	Gain	0.0298204	Y_RNA,POLRMTP1,RP11-51L5.3,MED13
9	124875022	125068857	Gain	0.0109391	MIR4478,AL162424.2,RN7SL227P,MORN5,LHX6,RBM18,NDUFA8,MRRF
1	158512449	158680658	Gain	0.0310969	OR6Y1,OR6P1,OR10X1,OR10Z1,OR6K1P,OR6K2,SPTA1
20	21241005	21444383	Gain	0.0106317	ZNF877P,NKX2-4,RP11-227D2.3,RN7SKP140,XRN2
7	26061860	26222452	Gain	0.0151315	AC004520.1,NFE2L3,CTB-119C2.1
21	17846492	18008194	Gain	0.0230953	MIR99A,MIRLET7C,AP000962.2,MIR125B2,AP000473.5,LINC00478
17	66678300	66836098	Gain	0.0353679	AC011591.1,RP11-118B18.2,RP11-118B18.1
13	48334097	48531676	Gain	0.0149901	NAP1L4P3,RPL27AP8,RP11-279N8.1,LINC00562,LINC00444,SUCLA2
5	147678849	147982295	Loss	0.0238422	PGBD4P3,SPINK7,CTD-2283N19.1,AC091948.1,FBXO38,RP11-373N22.3,SPINK9,HTR4
3	97037004	97217084	Gain	0.0349244	RP11-529P9.1,EPHA6
20	41617133	41782312	Gain	0.000297863	RN7SKP100,PTPRT
3	127929995	128109940	Gain	0.0040814	MIR1280,EEFSEC
9	99002855	99168058	Gain	0.0040814	RP11-240L7.4,RNU6-1160P,HSD17B3,ZNF367,SLC35D2
2	119744567	119945952	Gain	0.0496022	RN7SL468P,MARCO,C1QL2
3	195746771	195924172	Gain	0.000406968	AC024937.2,RNU7-18P,TFRC,LINC00885
20	44479794	44683085	Gain	0.000297863	ZSWIM1,NEURL2,CTSA,RP3-337O18.9,FTLP1,MMP9,AL162458.1,ACOT8,ZSWIM3,SPATA25,PLTP,ZNF335,RP11-465L10.10,SLC12A5,PCIF1
18	59054412	59333216	Loss	0.000328366	RNU6-116P,RPL30P14,RP11-879F14.2,CDH20,RP11-879F14.3,RP11-879F14.1
18	11746664	12048802	Loss	0.00371171	RP11-78A19.2,CHMP1B,RP11-78A19.3,RP11-78A19.4,RP11-820I16.4,RP11-820I16.2,RP11-820I16.3,RP11-703I16.1,RP11-703I16.3,RP11-677O4.7,MPPE1,RP11-820I16.1,IMPA2,GNAL
19	28980282	29173823	Gain	0.018092	AC005616.2,AC005307.3,AC005616.1,AC005394.1,AC079466.1
3	125934117	126097848	Gain	0.0122297	RP11-71E19.1,RP11-71E19.2,KLF15
13	74057915	74249619	Gain	0.0093328	LINC00392,LINC00393
20	6930728	7118372	Gain	0.0262133	RP4-764O22.1
2	208334325	208500333	Gain	0.038105	METTL21A,AC007879.5,CREB1
9	110905202	111062851	Gain	0.0040814	RP11-505C13.1
20	40168754	40353798	Gain	0.000586425	RPL12P11,RNU6-1018P,Y_RNA,SNORA26,CHD6
20	51892103	52055949	Gain	0.000255176	PPIAP10,RP4-669H2.1,TSHZ2,RP4-678D15.1
9	93754830	93951547	Gain	0.018092	RP11-367F23.2,RP11-305L7.1,LINC00484,RP11-305L7.5,RP11-305L7.6,RP11-305L7.3
20	10123425	10304540	Gain	0.0270241	RP11-416N4.1,RP11-416N4.4,SNAP25-AS1,SNAP25
2	103182760	103356891	Gain	0.0496022	MFSD9,SLC9A2,TMEM182
13	94981553	95164549	Gain	0.0216849	AL139318.1,DCT,GPC6
9	100497999	100688915	Gain	0.0040814	RP11-546O6.4,RP11-23B15.1,FOXE1,Y_RNA,C9orf156
13	81608537	81802641	Gain	0.0149901	RP11-521J24.1,DPPA3P3,AL354806.1,LINC00564
20	42253506	42416875	Gain	0.000297863	RPL27AP,GTSF1L,IFT52,MYBL2
9	38389600	38569156	Gain	0.038105	ALDH1B1,RP11-403F21.3,RP11-392E22.1,VN1R48P,RP11-392E22.3,FAM220BP,RP11-392E22.12,CYP4F33P,RP11-392E22.10,RP11-392E22.5,IGFBPL1,RP11-403F21.1,ANKRD18A,ANKRD18A,RP11-392E22.11,SNX18P3
9	111560215	111717909	Gain	0.0040814	RPL36AP35,RP11-3J11.1,ACTL7B,ACTL7A,FAM206A,CTNNAL1,IKBKAP
20	60276963	60467272	Gain	0.000403242	RP11-429E11.2,CDH4,RP11-429E11.3
2	218258531	218451833	Gain	0.0198618	DIRC3
20	30759991	30955353	Gain	0.00358101	TSPY26P,MIR1825,AL121897.1,PLAGL2,KIF3B,ASXL1,POFUT1
20	55682388	55844382	Gain	0.000977654	RP11-560A15.3,RP4-813D12.2,RP4-813D12.3,BMP7
11	66842470	67149024	Loss	6.22e-05	AP001885.1,snoU13,POLD4,RN7SKP239,ADRBK1,ANKRD13D,SSH3,AP003419.11,CLCF1,KDM2A
3	126099848	126270911	Gain	0.0122297	RP11-71E19.5,CCDC37,ZXDC,CHST13,C3orf22,UROC1
13	81060103	81244085	Gain	0.0102245	HNRNPA1P31,PWWP2AP1
13	80851108	81028997	Gain	0.0102245	SPRY2,RNU6-61P
20	55496772	55680423	Gain	0.000509244	AL117380.2,AL117380.1
20	11293228	11470255	Gain	0.0184492	RPS11P1
20	52808779	52994434	Gain	0.000509244	PFDN4
18	25526413	25828973	Loss	0.00117543	AC015933.2,CDH2
2	191024085	191216108	Gain	0.0246357	HIBCH,INPP1,C2orf88
2	160697636	160867058	Gain	0.00961489	LY75,LY75-CD302,PLA2R1
13	28793482	28985366	Gain	0.0102162	RNU6-82P,PAN3,FLT1
2	160535474	160697635	Gain	0.00961489	AC009961.2,AC009961.5,7-Mar,CD302,AC009961.3,LY75,LY75-CD302
7	31116168	31312818	Gain	0.0159988	AC006466.5,ADCYAP1R1
1	201286319	201455778	Gain	0.00381537	RP11-134G8.2,RP11-134G8.8,PHLDA3,PKP1,TNNT2,LAD1,TNNI1,CSRP1
13	27791847	27963890	Gain	0.00953436	LINC00412,RPL21,SNORD102,SNORA27,RASL11A,AL159977.1,RNU6-70P,LINC01079
20	51515634	51707780	Gain	0.000297863	AL050316.1,TSHZ2
19	29178737	29337352	Gain	0.018092	CTC-478M6.1,AC005307.3
1	238918744	239081747	Gain	0.00114975	MIPEPP2
1	239081748	239253606	Gain	0.00114975	RP11-307O1.1
2	209248804	209452302	Gain	0.038105	AC019185.2,AC019185.3,AC019185.4,PTH2R
20	42495338	42682019	Gain	0.000297863	RP5-1030M6.3,RN7SL443P,TOX2
20	36704332	36868816	Gain	0.0011115	RN7SL237P,TGM2,KIAA1755,RPRD1B
13	32731438	32930644	Gain	0.0216153	RP11-37E23.5,ZAR1L,FRY,BRCA2
2	202258469	202422866	Gain	0.038105	Y_RNA,AC007163.8,AC007282.6,AC007163.9,AC007163.10,AC007163.11,MTND4P29,MTND5P31,STRADB,AC007256.5,TRAK2,ALS2CR11
13	29075781	29245683	Gain	0.0102162	EIF4A1P7,POMP
3	117626868	117802894	Gain	0.0208064	RP11-384F7.1,LSAMP,RP11-384F7.2
2	191839960	192015072	Gain	0.0246357	AC067945.3,AC067945.2,RNU6-959P,STAT1,STAT4,AC067945.4
18	40543413	40831691	Loss	0.000442116	RIT2
2	212426805	212588626	Gain	0.0198618	ERBB4
2	196647156	196833350	Gain	0.0246357	DNAH7
13	45831182	46012301	Gain	0.0216367	RP11-290D2.5,AL138963.1,SNORA31,TPT1,SNORA31,RP11-290D2.6,RP11-290D2.3,RCN1P2,SLC25A30-AS1,PPIAP25,TPT1-AS1,SLC25A30,GTF2F2
1	192141837	192310247	Gain	0.011649	RP11-142L4.3,RP11-142L4.2,RGS21,RGS18
2	212596916	212798237	Gain	0.0198618	MTND2P23,AC105921.5,ERBB4
20	4851843	5024034	Gain	0.0184492	snoU13,RP5-1116H23.1,RN7SL514P,SLC23A2
5	105029214	105311315	Loss	0.035904	RNA5SP189
13	27225105	27393769	Gain	0.00953436	GPR12,WASF3
7	36851154	37040366	Gain	0.0442581	NPM1P18,MIR1200,AC007349.7,ELMO1-AS1,ELMO1
13	43119337	43297593	Gain	0.0216367	TNFSF11
1	189785984	189958100	Gain	0.011649	RP11-445J9.1
5	150168890	150470575	Loss	0.0362889	SMIM3,AC010441.1,IRGM,ZNF300,ZNF300P1,GPX3,TNIP1
20	55194543	55361010	Gain	0.000509244	RNU6-1146P,RN7SL170P,PTMAP6,AL133232.1,RP5-897D18.1,TFAP2C
13	75805152	75983537	Gain	0.00291528	CTAGE11P,TBC1D4-AS1,LINC01078,TBC1D4
2	88493101	88659587	Gain	0.0496022	RNY4P15,AC012671.3,snoU13
11	129018990	129322211	Loss	0.00022433	RNU6-874P,ZNF123P,BARX2,ARHGAP32
5	132272357	132465186	Gain	0.0413305	AC010240.2,Y_RNA,ATP6V0E1P1,CTC-350I8.1,AC010240.3,Y_RNA,RP11-485M7.1,ZCCHC10,HSPA4,RP11-485M7.3,AFF4
2	214725734	214887022	Gain	0.0198618	SPAG16
18	30480119	30776791	Loss	0.00293901	RP11-680N20.1,RP11-746B8.1,CCDC178
1	226154669	226327068	Gain	0.0136602	RP11-396C23.4,H3F3A,RP11-396C23.2,RP11-396C23.3,SDE2
2	199293826	199456781	Gain	0.015695	AC019330.2,AC019330.1,PLCL1
3	187974733	188163950	Gain	0.000732976	LPP
17	40559949	40737756	Gain	0.0451248	RNU7-97P,MIR548AT,RP11-194N12.2,RP11-400F19.18,MIR5010,AC067852.1,PTP4A2P1,NAGLU,HSD17B1P1,HSD17B1,RP11-400F19.6,MLX,PSMC3IP,PTRF,RP11-400F19.8,COASY,FAM134C,ATP6V0A1
3	150218615	150388598	Gain	0.0013101	RP11-392O18.2,SERP1,EIF2A,FAM194A,SELT
1	245684822	245880921	Gain	0.00744067	RP11-522M21.2,RP11-522M21.3,KIF26B
13	78460689	78657699	Gain	0.00450528	RP11-318G21.4,RN7SL810P,LINC01069,EDNRB,LINC00446,RNF219-AS1
3	196974183	197133081	Gain	0.000732976	MIR4797,DLG1-AS1,snoU13,DLG1
17	56982452	57171146	Gain	0.0451248	RP11-579O24.3,AC100832.1,RN7SL716P,PPM1E,TRIM37
13	58491198	58694867	Gain	0.00291634	RNA5SP30
1	235326580	235519053	Gain	0.00308367	ARID4B-IT1,MIR4753,RPL23AP23,AL391994.1,RP11-382D8.3,GGPS1,ARID4B
10	104593245	104882491	Loss	0.0458959	CYP17A1-AS1,PFN1P11,PTGES3P4,C10orf32,RP11-753C18.8,RP11-724N1.1,C10orf32-ASMT,RNU6-372P,AS3MT,CYP17A1,CNNM2,NT5C2
9	88073146	88248215	Gain	0.018092	STK33P1,AGTPBP1
9	88254012	88441828	Gain	0.018092	RP11-213G2.1,RP11-202I11.2,RP11-213G2.2,RP11-213G2.3,AGTPBP1
3	162961220	163159978	Gain	0.0013101	CT64
20	12045370	12247006	Gain	0.0184492	RP4-796I8.1
11	69294139	69572684	Loss	0.000212464	AP000439.3,RP11-300I6.5,FGF19,CCND1,ORAOV1
7	30649672	30853698	Gain	0.0323309	AC006022.4,AC004691.5,CRHR2,INMT,FAM188B,GARS,INMT-FAM188B
11	46814956	47120209	Loss	0.0074303	CTD-2384B9.1,LRP4-AS1,CKAP5,LRP4,C11orf49
9	134358658	134536016	Gain	0.018092	SNORD62A,SNORD62B,AL358781.1,RP11-334J6.6,UCK1,POMT1,PRRC2B,RAPGEF1
13	75062388	75224986	Gain	0.00414403	LINC00347
20	59786224	59969532	Gain	0.000403242	CDH4
1	244938499	245110231	Gain	0.00744067	RP11-11N7.4,RN7SKP55,COX20,HNRNPU-AS1,HNRNPU
13	75600055	75795904	Gain	0.00414403	RNU6-38P,AL162571.1,SSR1P2
5	131029683	131227499	Gain	0.0413305	ACSL6,AC034228.7,CTC-432M15.3,FNIP1
3	122780413	122940376	Gain	0.0122297	PDIA5,SEC22A
7	34914906	35095244	Gain	0.032006	SNORA31,MIR548N,NPSR1,DPY19L1
20	16345278	16506015	Gain	0.00414687	AL118509.1,KIF16B
19	32375148	32672694	Loss	0.0325174	AC011456.1,AC011518.1,AC011518.2,CTC-360P9.1,CTC-360P9.5,CTC-360P9.2,CTC-360P9.3,CTC-360P9.4
11	43939764	44245659	Loss	0.0208064	RP11-613D13.8,CTD-2609K8.3,ALKBH3-AS1,RP11-613D13.4,C11orf96,ACCSL,ACCS,ALKBH3,EXT2
11	76899116	77205237	Loss	0.00127277	CTD-2589O24.1,MYO7A,DKFZP434E1119,GDPD4,PAK1
5	132081897	132272356	Gain	0.0413305	SOWAHA,SHROOM1,RNA5SP192,LEAP2,CCNI2,AC004775.5,GDF9,UQCRQ,AFF4,8-Sep
1	222113181	222286576	Gain	0.00744067	AC092765.1,RP11-815M8.1,RP11-400N13.2,RP11-400N13.3,RP11-400N13.1
3	143272256	143435704	Gain	0.0013101	RP11-501M7.1,SLC9A9
7	33196260	33352274	Gain	0.032006	RNA5SP229,AC007312.3,BBS9
3	162825977	162961219	Gain	0.0013101	RP11-535I24.2,snoU13,RP11-10O22.1,CT64
1	153061338	153215145	Gain	0.0458959	SPRR2F,SPRR2C,SPRR2G,LELP1,RP1-140J1.4,SPRR2E,RP1-140J1.1,PRR9,SPRR2B
2	205970804	206112444	Gain	0.038105	PARD3B
11	82984904	83259479	Loss	0.000708023	CYCSP28,AP003026.1,CCDC90B,RP11-727A23.10,DLG2
20	46917765	47053591	Gain	0.000145464	RP1-66N13.1,LINC00494
17	80361050	80502135	Gain	0.0412326	Y_RNA,C17orf62,RP13-991F5.2,NARF-IT1,HEXDC,RP13-20L14.6,NARF,OGFOD3,FOXK2
20	10648558	10786911	Gain	0.0367153	RP1-278O22.1,RP1-278O22.2,JAG1,RP11-103J8.1
9	35440434	35591039	Gain	0.038105	ZFAND6P1,RPL36AP33,FAM166B,ATP8B5P,RUSC2
11	79452344	79721187	Loss	0.000708023	RP11-885L14.1
13	35911778	36058038	Gain	0.0216153	MAB21L1,NBEA
7	34204208	34359832	Gain	0.032006	RNU6-438P,AC005686.1,AC009262.2
20	58025422	58175987	Gain	0.000346926	PIEZO1P1,RP11-164D18.2,PHACTR3
13	92923125	93080695	Gain	0.0150632	GPC5-AS2,GPC5
13	31578220	31724793	Gain	0.0216153	WDR95P,HSPH1
7	33809158	33954166	Gain	0.032006	RP11-89N17.3,RP11-89N17.4,BMPER
20	33943675	34093757	Gain	0.0011115	GDF5OS,MIR1289-1,GDF5,UQCC1,CEP250,RP3-477O4.14
19	30635473	30768475	Gain	0.00653884	AC005597.1,ZNF536
13	32343998	32490930	Gain	0.0216153	RXFP2,EEF1DP3
1	238215703	238357077	Gain	0.00189251	YWHAQP9
3	88214146	88348460	Gain	0.0132817	C3orf38
13	103338230	103491627	Gain	0.0309077	METTL21C,snoU13,LINC00283,TEX30,RNY5P8,CCDC168,KDELC1,BIVM,BIVM-ERCC5
13	90096050	90244185	Gain	0.0150632	LINC00353,RP11-75N6.3,LINC01040
2	209618773	209771310	Gain	0.038105	PTH2R
11	68996443	69264370	Loss	0.000212464	IFITM9P,RP11-211G23.2,RP11-211G23.1,AP000439.1,AP000439.2,MYEOV
13	102307358	102441668	Gain	0.0309077	RP11-397O8.7,RNU1-24P,ITGBL1,FGF14
3	188938886	189094307	Gain	0.000732976	TPRG1-AS2,TPRG1
20	51076274	51218469	Gain	0.000297863	RP5-1022J11.2,MRPS33P4,RP4-723E3.1
3	148592444	148735111	Gain	0.0013101	UBQLN4P1,CPA3,GYG1,RP11-680B3.2
7	136341234	136485095	Gain	0.0364145	PSMC1P3,hsa-mir-490
13	84513321	84668038	Gain	0.0216849	UBE2D3P4
17	43059072	43199763	Gain	0.0451248	CTD-2534I21.9,Y_RNA,NMT1,PLCD3,DCAKD
7	13873813	14014665	Gain	0.0102944	AC005019.3,AC005019.2,ETV1
7	26491234	26624127	Gain	0.0151315	AC004947.2,KIAA0087,AC004540.5
11	125287501	125560661	Loss	0.00127277	AP000708.1,RNU6-1156P,RNU2-35P,FEZ1,EI24,STT3A-AS1,STT3A,CHEK1,ACRV1,PKNOX2
13	83264091	83398700	Gain	0.00684491	GYG1P2
13	102628015	102781918	Gain	0.0218635	LIPT1P1,RNY1P2,MIR4705,FGF14
9	15862959	16004160	Gain	0.0314804	CCDC171
7	5265956	5399742	Gain	0.0151315	AC093376.1,SLC29A4,TNRC18,WIPI2
13	94075239	94232044	Gain	0.0216849	GPC6
9	16063403	16219480	Gain	0.0314804	C9orf92
1	169583197	169724779	Gain	0.0207575	SELP,SELL,SELE,C1orf112
13	62429394	62563130	Gain	0.0102245	RP11-429G17.2
13	84350204	84490959	Gain	0.0216849	SLITRK1,VENTXP2
13	48533814	48690926	Gain	0.0102245	SUCLA2-AS1,NUDT15,MED4-AS1,SUCLA2,MED4
1	188972582	189112184	Gain	0.0207575	CLPTM1LP1,RP11-373J16.2,LINC01035
7	16026003	16169658	Gain	0.0151315	RP11-196O16.1,AC006035.1,ISPD
8	18668483	18940622	Loss	0.0433759	SNORA62,RP11-420B22.2,RP11-420B22.1,PSD3
13	82160317	82302689	Gain	0.0102245	PTMAP5
5	128303407	128577385	Loss	0.0404556	MIR4633,ISOC1,SLC27A6
19	47244862	47518851	Loss	0.0128084	HNRNPMP2,CTB-147N14.4,snoU13,STRN4,FKRP,SLC1A5,AP2S1,ARHGAP35
9	124719179	124854550	Gain	0.018092	TTLL11-IT1,TTLL11
13	69642573	69791451	Gain	0.00684222	SNRPFP3
11	47394318	47662781	Loss	0.0074303	AC090559.2,MIR4487,PSMC3,RNU6-1302P,AC090559.1,RP11-750H9.7,PTPMT1,RNU5E-10P,KBTBD4,FAM180B,Y_RNA,SPI1,RP11-750H9.5,SLC39A13,RAPSN,NDUFS3,KBTBD4,C1QTNF4,MTCH2,CELF1,RN7SL652P
17	63876900	64031719	Gain	0.0353679	CEP112
13	29245684	29384657	Gain	0.00684222	RNU6-53P,CYP51A1P2,POM121L13P,POMP,SLC46A3
13	19590336	19725096	Gain	0.0150632	USP24P1,GTF2IP3,RP11-301J16.7,RNA5SP24,RNU6-52P,CENPIP1,PHF2P2
17	64048788	64189792	Gain	0.0353679	CEP112
17	28811300	28952028	Gain	0.0412326	RP11-218M11.3,RP11-218M11.1,KRT17P3,SH3GL1P2,ALOX12P1,RP11-271K11.1,TBC1D29,RP11-218M11.6,AC006050.2,SMURF2P1,GOSR1,AC005562.1
13	37704055	37849502	Gain	0.0216367	RN7SKP1,RPS12P24
7	35900150	36042221	Gain	0.0442581	RNU6-1085P,RP11-609L3.1,SEPT7P3,7-Sep
3	178784534	178928091	Gain	0.000732976	Y_RNA,SNORA25,RP11-360P21.2,ZMAT3,PIK3CA
20	47593860	47739814	Gain	0.000145464	SNAP23P,RP1-155G6.4,STAU1,ARFGEF2,CSE1L
7	35526377	35661868	Gain	0.0442581	AC007652.1
3	197133083	197281338	Gain	0.000732976	AC128709.2,RP13-616I3.1,AC128709.1,AC128709.3,AC128709.4,BDH1
11	73276872	73542259	Loss	0.000212464	HMGN2P38,AP000860.2,Y_RNA,RP11-456I15.2,RP11-707G14.1,PLEKHB1,FAM168A,MRPL48,RAB6A
1	225070169	225213553	Gain	0.0136602	DNAH14
20	22661449	22803908	Gain	0.0107578	KRT18P3,AL158175.1,RP11-359G22.2
17	77095143	77234671	Gain	0.0412326	RP11-398J5.1,RBFOX3
7	22691865	22833821	Gain	0.0151315	AC073072.5,IL6,AC073072.6,AC073072.7,AC002480.2,AC002480.5
9	25780015	25916353	Gain	0.038105	RP11-33G16.1
12	15287477	15557300	Loss	0.047587	RERG-AS1,RP11-365O10.1,RERG,PTPRO
1	200857774	200998403	Gain	0.00744067	RNU6-704P,RP11-168O16.1,C1orf106,KIF21B,MROH3P
17	28205736	28341880	Gain	0.0235086	snoU13,RP11-338L22.3,AC104996.1,SSH2,EFCAB5
20	6164781	6311968	Gain	0.0178397	TARDBPP1,RP4-775C13.1,RP4-775C13.2,AL109618.1
9	74878505	75032438	Gain	0.0295474	RP11-63P12.2,RNA5SP285,RP11-63P12.6,ZFAND5
5	142873031	143012858	Gain	0.0413305	RNU7-156P,CTD-2050E21.2,CTD-2050E21.1,CTB-57H20.1
9	117916679	118067965	Gain	0.0040814	RP11-445L6.3,1-Dec
5	129874850	130008493	Gain	0.0413305	AC005741.2
19	31423895	31557426	Gain	0.0248604	CTC-400I9.3
2	114293991	114428705	Gain	0.0496022	FAM138B,MIR1302-3,DDX11L2,RP11-395L14.17,AC017074.1,RP11-395L14.5,WASH2P,RPL23AP7,RABL2A,RP11-395L14.13,RP11-395L14.4
1	192989259	193126441	Gain	0.00616225	snoU109,RP11-101E13.5,MIR1278,UCHL5,TROVE2,GLRX2,CDC73
1	181030834	181171872	Gain	0.011649	RP11-309G3.3,RP11-540K16.1,RP11-540K16.2,IER5,MR1
17	65882899	66015962	Gain	0.0235086	RP11-855A2.3,RN7SL622P,C17orf58,RP11-855A2.5,BPTF
1	174311124	174444551	Gain	0.0207575	AL022400.1,RP4-809F4.1,GPR52,RABGAP1L
3	176270852	176405846	Gain	0.000406968	RP11-71G7.1,RP11-644C3.1
7	30517096	30649671	Gain	0.0230702	AC005154.7,AC005154.8,RP4-777O23.1,NOD1,AC005154.6,RP4-777O23.2,GGCT,GARS
9	83072458	83223688	Gain	0.0295474	RP11-117O7.2,MTND2P9
13	42759778	42902285	Gain	0.0306693	FHP1,DGKH,AKAP11
17	30634363	30784033	Gain	0.0279113	RP11-227G15.2,MIR632,RP11-227G15.8,RP11-227G15.9,RP11-227G15.6,RHBDL3,ZNF207,RP11-227G15.3,C17orf75,OOSP1P2,PSMD11
2	198761342	198894511	Gain	0.015695	PLCL1
13	76338930	76478770	Gain	0.00291528	RP11-332E3.2,C13orf45,RP11-29G8.3,LMO7
9	125673677	125824127	Gain	0.0122297	ZBTB6,RP11-355O1.11,Y_RNA,RP11-355O1.7,GPR21,RP11-123N4.4,ZBTB26,RABGAP1
1	171434437	171578075	Gain	0.0207575	snoU13,RN7SL425P,RNU6-773P,PRRC2C
9	100005128	100158814	Gain	0.0040814	MIR1302-8,RP11-23J9.7,RP11-23J9.3,RP11-23J9.5,CCDC180,RP11-23J9.4,RP11-23J9.6
13	98035303	98175247	Gain	0.0428835	PSMA6P4,RAP2A,MBNL2
18	59574157	59847526	Loss	0.000555643	RPIAP1,PIGN
5	169999407	170145382	Gain	0.0230953	CTC-265N9.1,KCNIP1
20	30441983	30578467	Gain	0.00358101	RNU1-94P,DUSP15,TTLL9,XKR7,PDRG1
2	165099766	165247717	Gain	0.0155531	CYP2C56P,AC092684.1
5	144496296	144649752	Gain	0.0413305	AC132803.1,ASS1P10,CTC-367F4.1
17	58102750	58260370	Gain	0.0298204	AC005702.1,AC005702.4,AC005702.3,AC005702.2,MIR4737,RP11-178C3.6,CTD-2319I12.5,FAM106DP,HEATR6,CTD-2319I12.2,CTD-2319I12.1,CTD-2319I12.4,CA4,CTD-2319I12.3,USP32
20	21952111	22107161	Gain	0.0158	RP11-125P18.1
20	58175988	58329599	Gain	0.000673974	RP4-719C8.1,PHACTR3
17	57889746	58027628	Gain	0.0298204	MIR21,RNU6-450P,NDUFB8P2,RP5-1073F15.1,TUBD1,RPS6KB1,RP11-178C3.1,VMP1
20	41144168	41295294	Gain	0.000586425	RP4-730D4.1,PTPRT
2	98302554	98456615	Gain	0.049089	HMGN1P36,ZAP70,LINC01125,TMEM131
13	25353641	25509384	Gain	0.0428835	CENPJ,TPTE2P1,RNF17
2	221290228	221447084	Gain	0.0198618	AC019051.1,AC067956.1,AC114765.1
1	233835699	233981596	Gain	0.00308367	RP11-301G21.1
9	86517541	86674352	Gain	0.0295474	MIR7-1,Y_RNA,C9orf64,HNRNPK,RP11-575L7.8,RMI1,KIF27
5	133012034	133160254	Gain	0.0413305	AC005178.1
20	19157634	19308025	Gain	0.00466748	RP11-97N19.2,RP5-1027G4.3,SLC24A3
13	59625180	59778800	Gain	0.00450528	POLR3KP1
5	149672775	149810923	Gain	0.0413305	TCOF1,CD74,ARSI
18	54049509	54322418	Loss	0.000608407	TXNL1,WDR7
1	211693856	211832965	Gain	0.00639857	RP11-359E8.5,RP11-354K1.1,AL356310.1,SLC30A1,RP11-354K1.2
1	228811802	228956246	Gain	0.0179843	FTH1P2,RHOU,RP4-799G3.1
7	32135922	32272859	Gain	0.0227997	PDE1C
2	204021437	204173909	Gain	0.0198618	AC011737.2,RN7SL670P,CYP20A1,NBEAL1
1	209932122	210068117	Gain	0.011649	C1orf74,TRAF3IP3,RP3-434O14.8,DIEXF,IRF6
10	114492899	114756284	Loss	0.0279113	RP11-57H14.4,RP11-57H14.2,RP11-139K1.2,RP11-57H14.3,TCF7L2,VTI1A
16	12611373	12879710	Loss	0.0230953	RP11-552C15.1,CTD-3037G24.4,MIR4718,CTD-2583P5.3,CTD-3037G24.3,CPPED1,CTD-2583P5.1,SNX29
7	7455912	7593139	Gain	0.0230702	RP5-1159O4.2,COL28A1,RP5-1159O4.1
9	84380739	84521380	Gain	0.0295474	AL158154.1,RNA5SP287,SNORD95,RP11-154D17.1
2	215001226	215145765	Gain	0.0198618	RPL5P8,AC107218.3,SPAG16
2	103762342	103896619	Gain	0.0496022	AC073987.2,AC073987.1
5	147985415	148254107	Loss	0.0238422	HTR4-IT1,ADRB2,HTR4
3	135979568	136132281	Gain	0.0023226	PCCB,STAG1
1	214635647	214774522	Gain	0.00468996	RP11-365D23.4,KRT18P12,PTPN14
9	107994165	108127884	Gain	0.0040814	SLC44A1
19	33022456	33283777	Loss	0.0325174	PDCD5,SNORA68,RPS12P31,RN7SL789P,RGS9BP,CTD-2538C1.2,NUDT19,CTD-2538C1.3,ANKRD27,CTC-379B2.4,TDRD12
18	2525442	2783455	Loss	0.011883	snoU109,RP11-715F3.2,RP11-715F3.1,KATNBL1P3,Y_RNA,RNU6-340P,snoU13,Y_RNA,METTL4,NDC80,CBX3P2,SMCHD1,RP11-703M24.5
1	160537204	160668408	Gain	0.0207575	SETP9,AL121985.1,RP11-528G1.2,CD84,SLAMF1,RP11-404F10.2,CD48
11	126938336	127196755	Loss	0.00127277	RP11-168K9.2,CTD-2234N14.1,RP11-480C22.1,CTD-2234N14.2
16	18808403	19069833	Loss	0.0413305	RP11-1035H13.2,snoU13,AC092287.1,RNU6-1340P,RP11-1035H13.3,ARL6IP1,CTD-2288F12.1,TMC7,SMG1
20	10478939	10611063	Gain	0.0262133	RP5-1099D15.1,SLX4IP
17	20994730	21127058	Gain	0.0415716	DHRS7B,AC087294.2,TMEM11
18	6764634	7022495	Loss	0.00147251	RP11-146G7.2,LINC00668,SCML2P1,RNU6-916P,RP11-781P6.1,RN7SL537P,ARHGAP28,LAMA1
5	127627830	127888093	Loss	0.0404556	Y_RNA,FBN2,SLC27A6
20	35393624	35524811	Gain	0.00203077	RN7SL156P,SOGA1,DSN1,TLDC2,SAMHD1
8	20664483	20927020	Loss	0.0310569	TMEM97P2,RP11-421P23.2,RP11-369E15.1,RP11-369E15.3,RP11-369E15.4,RP11-369E15.2,RP11-421P23.1
11	7612282	7869529	Loss	0.047587	CYB5R2,RP11-35J10.4,OR10AB1P,OR5P4P,OR5P1P,RP11-494M8.1,OR5P2,OR5P3,OVCH2,PPFIBP2,RP11-35J10.5,RP11-494M8.4
13	70696501	70828185	Gain	0.00684222	ATXN8OS
11	87485348	87745806	Loss	0.00127277	RP11-665E10.5,RP11-665E10.1,RP11-665E10.3
20	33674460	33805276	Gain	0.0011115	SNORD56,PROCR,RNA5SP483,RP4-614O4.12,AL121753.1,TRPC4AP,EDEM2,MMP24-AS1
11	73752400	74012087	Loss	6.68e-05	RP11-691F15.1,RNA5SP343,SNORA7,P4HA3,C2CD3,PPME1
11	6346478	6608564	Loss	0.0295474	RP11-304C12.3,SMPD1,ARFIP2,CTD-2010I16.1,HPX,TRIM3,TIMM10B,TIMM10B,APBB1,DNHD1
11	61913778	62173206	Loss	0.00011479	RP11-691L4.2,SCGB1D1,SCGB1D2,SCGB2A2,SCGB1D4,NPM1P35,RP11-703H8.7,RCC2P6,AP003064.2,CTD-2531D15.5,INCENP,SCGB2A1,SCGB1A1,RP11-703H8.9,ASRGL1
10	104882493	105144942	Loss	0.0179843	RP11-332O19.2,MARCKSL1P1,ST13P13,RPEL1,RNU11-3P,INA,PCGF6,TAF5,NT5C2
11	87242644	87485347	Loss	0.00127277	RNU6-1135P,RNU6-1063P,RP11-720D4.3
20	4104510	4228327	Gain	0.0270241	RP4-779E11.3,SMOX,ADRA1D
13	59785716	59887338	Gain	0.00450528	RPP40P2
9	101562915	101667626	Gain	0.0040814	RP11-92C4.4,RP11-92C4.3,GALNT12
2	200185915	200293237	Gain	0.015695	RP11-486F17.1,SATB2
13	20004674	20105322	Gain	0.0216849	CYCSP32,TPTE2
20	13845726	13965125	Gain	0.0270241	AL117333.1,RNU6-278P,SEL1L2
20	30644121	30727658	Gain	0.00358101	AL049539.1,TM9SF4,HCK
20	30229255	30332465	Gain	0.00358101	AL160175.1,COX4I2,TPX2,BCL2L1,RP11-243J16.7
13	19842776	19935721	Gain	0.0216849	MRPL3P1,LINC00421,ANKRD26P3,PARP4P2
20	13447004	13557507	Gain	0.0270241	TASP1
13	19739166	19834074	Gain	0.0216849	TUBA3C,SMPD4P2,RP11-408E5.4,PSPC1P1
20	3296040	3398310	Gain	0.0270241	RNU6-1019P,UBE2V1P1,U3,AL117334.1,C20orf194
13	19464042	19589531	Gain	0.0216849	SNX19P2,LINC00442,LINC00408,RP11-442J17.3,PHF2P2
13	47793930	47890654	Gain	0.0216849	GNG5P5
18	42977086	43225696	Loss	0.00129615	RP11-309E23.2,RP11-749H17.1,RP11-749H17.2,SLC14A2
1	243451344	243555218	Gain	0.00744067	MIR4677,SDCCAG8
2	108313145	108437186	Gain	0.0496022	GACAT1
5	59709753	59796663	Gain	0.0325174	RP11-546M4.1,FKSG52,SETP21,PART1,PDE4D
19	33563127	33788842	Loss	0.0325174	AC008738.2,CTD-2540B15.13,CTD-2540B15.6,CTD-2540B15.12,GPATCH1,WDR88,CTD-2540B15.10,SLC7A10,LRP3
1	202209967	202298108	Gain	0.00744067	LGR6
1	201005555	201131277	Gain	0.00744067	RP11-168O16.2,ASCL5,TMEM9,CACNA1S
1	231702097	231816170	Gain	0.00308367	RNU5A-5P,TSNAX,DISC1,TSNAX-DISC1,LINC00582
17	30784034	30880647	Gain	0.0279113	Y_RNA,CDK5R1,RP11-466A19.1,RP11-466A19.8,RP11-466A19.6,RP11-466A19.5,RP11-466A19.3,PSMD11,MYO1D
2	106643808	106741432	Gain	0.0496022	UXS1,C2orf40
2	197610703	197700960	Gain	0.015695	C2orf66,CCDC150,GTF3C3,PGAP1
1	243360468	243451343	Gain	0.00744067	AC092782.1,FCF1P7,CEP170,SDCCAG8
9	132058299	132162469	Gain	0.018092	C9orf106,RP11-65J3.15,RN7SL159P,RP11-65J3.6,RP11-65J3.1
17	55377920	55480077	Gain	0.0451248	MSI2
19	36655407	36892164	Loss	0.0325174	AC002984.2,RN7SL287P,Y_RNA,AC092296.1,CTD-3162L10.3,CTD-3162L10.4,ZNF146,CTD-3162L10.1,LINC00665,ZFP82,ZFP14,ZNF565
2	200500531	200604663	Gain	0.0451248	SEPHS1P6,AC093590.1
1	204284106	204382588	Gain	0.00744067	RP11-203F10.6,RP11-739N20.3,RP11-739N20.2,PPP1R15B,PLEKHA6
17	79923718	80024316	Gain	0.0279113	RP11-498C9.17,STRA13,RAC3,DCXR,RP13-650J16.1,RFNG,GPS1,LRRC45,DUS1L,ASPSCR1
10	59146467	59385204	Loss	0.0496022	RP11-550A9.1
1	242062845	242190729	Gain	0.00744067	RP11-323D18.5,BECN1P1,CFL1P4,MAP1LC3C,RNU6-1139P
20	2062317	2158245	Gain	0.0270241	AL121899.1,STK35
13	75338360	75466471	Gain	0.00414403	RIOK3P1
20	2517121	2613594	Gain	0.0270241	TMC2
9	134275463	134358657	Gain	0.018092	PRRC2B
1	204989911	205104801	Gain	0.00744067	AL583832.1,TMEM81,RP11-536L3.4,RP11-383G10.1,CNTN2,RBBP5,NFASC
17	46707808	46791801	Gain	0.0451248	MIR196A1,RP11-357H14.17,CTD-2377D24.2,RPL9P28,CTD-2377D24.6,COX6B1P2,HOXB7,HOXB-AS4,CTD-2377D24.8
13	71665278	71785349	Gain	0.00414403	LINC00348
11	95038464	95267899	Loss	0.00127277	Y_RNA,RP11-338H14.1
11	101179728	101424575	Loss	0.00127277	MIR3920,TRPC6
13	73402822	73494401	Gain	0.00414403	AL391384.1,RNU6-79P,PIBF1
17	65764905	65882719	Gain	0.0235086	RP11-557B23.3,RPL17P41,AC006534.1,AC006534.2,BPTF
2	199490529	199583657	Gain	0.015695	AC019330.1
1	242629908	242757971	Gain	0.00744067	PLD5
17	42854208	42941467	Gain	0.0451248	CTC-296K1.3,CTC-296K1.4,ADAM11,GJC1,HIGD1B,EFTUD2
11	126446512	126689553	Loss	0.00127277	KIRREL3-AS1,RP11-115C10.1,KIRREL3
17	27831801	27954177	Gain	0.0235086	ABHD15,TP53I13,RP11-68I3.4,RP11-68I3.7,CORO6,RP11-68I3.10,TAOK1,RP11-68I3.2,GIT1,ANKRD13B,SSH2
19	32682475	32798465	Gain	0.0248604	RNA5SP472
2	165491225	165598513	Gain	0.00961489	SNORA70F,AC019181.3,COBLL1
20	7553344	7681541	Gain	0.0367153	RN7SL547P,AL031653.1
1	201151116	201271982	Gain	0.00381537	RP11-567E21.3,PKP1,IGFN1
20	8799856	8920070	Gain	0.0178397	RNU105B,RP5-859I17.2,PLCB1
20	6070583	6164622	Gain	0.0178397	FERMT1
2	159936001	160061216	Gain	0.00961489	TANC1
9	107503334	107602590	Gain	0.0040814	NIPSNAP3A,NIPSNAP3B,ABCA1
19	31936411	32027414	Gain	0.0248604	CTD-2050I18.2
11	65737684	65965382	Loss	1.65e-05	RP11-1167A19.6,BANF1,CST6,CATSPER1,snoU13,RP11-1167A19.2,snoU13,SART1,EIF1AD,GAL3ST3,SF3B2,PACS1
2	160867059	160983345	Gain	0.00961489	PLA2R1,ITGB6
1	213253701	213371127	Gain	0.00381537	RPS6KC1
7	33694981	33809157	Gain	0.0442581	RP11-89N17.2,RP11-89N17.1
20	20082067	20192598	Gain	0.00118701	C20orf26
2	116402984	116529287	Gain	0.0496022	DPP10
20	19884961	19977192	Gain	0.00118701	RIN2
13	42902286	43014464	Gain	0.0216367	FABP3P2
20	19711365	19840115	Gain	0.00118701	AL121761.1,AL121761.2,RPL12L3,RP1-122P22.2
9	104049636	104163006	Gain	0.0040814	SNORA31,BAATP1,TRMT112P4,RP11-35N6.6,FYTTD1P1,BAAT,MRPL50,ZNF189,LPPR1
9	98439240	98550467	Gain	0.0248604	DKFZP434H0512,RP11-180I4.2,LINC00476
13	27686726	27779851	Gain	0.00953436	USP12-AS1,USP12-AS2,USP12
11	64299330	64542901	Loss	3.21e-05	AP006288.1,SLC22A12,SLC22A11,AP001092.4,RASGRP2,PYGM,SF1,NRXN2
20	33570712	33674416	Gain	0.0011115	MIR499A,RNU6-407P,MYH7B,TRPC4AP
2	187528504	187637586	Gain	0.0246357	ITGAV,AC017101.10,FAM171B
13	26618360	26716966	Gain	0.0216153	LINC00415,PRUNEP1,SHISA2,ATP8A2P3,RNF6
20	18538093	18658992	Gain	0.0148636	LINC00493,RN7SL638P,RNU6ATAC34P,DUXAP7,SEC23B,RP11-379J5.5,DTD1
13	31408076	31531009	Gain	0.0216153	MEDAG,TEX26,TEX26-AS1,LINC00545
11	60128322	60367038	Loss	3.81e-06	MS4A5,MS4A1,MS4A12,MS4A6E,MS4A7,MS4A14,MS4A13
3	141022487	141111750	Gain	0.0038677	RP11-789L4.1,RP11-438D8.2,ZBTB38
20	35179496	35267038	Gain	0.0011115	C20orf24,HNRNPA3P2,RP5-977B1.7,RP5-977B1.11,TGIF2,TGIF2-C20orf24,SLA2
11	61046876	61286964	Loss	7.4e-06	TMEM138,RN7SL23P,PPP1R32,RP11-286N22.10,MIR4488,LRRC10B,VWCE,DAK,CYB561A3,TMEM216,CPSF7,DDB1,RP11-286N22.8,SDHAF2,SYT7
20	34094549	34182724	Gain	0.0011115	RP3-477O4.16,RPL36P4,RPL37P1,RP3-477O4.5,C20orf173,ERGIC3,FER1L4,CEP250
20	50288953	50382620	Gain	0.000297863	RP5-827A12.2,ATP9A
20	18659537	18777077	Gain	0.00999222	EEF1A1P34,LINC00652,RP11-379J5.5,RP5-1068E13.7,DTD1
2	196840798	196939554	Gain	0.0246357	AC104600.1,AC114760.1,DNAH7
20	8922729	9007214	Gain	0.0178397	PLCB1
13	30271528	30373171	Gain	0.0149842	UBL3
13	26374173	26474188	Gain	0.0216153	RP11-467D10.2,AL138815.2,AL138815.1,ATP8A2
20	16670634	16774816	Gain	0.00997907	RP4-705D16.3,SNRPB2,OTOR
2	197175982	197286613	Gain	0.009863	HECW2
2	164918873	165039981	Gain	0.00961489	AC092684.1
7	126295941	126392025	Gain	0.0499872	GRM8
1	238024021	238137648	Gain	0.00114975	ZP4,RP11-193H5.2,MTRNR2L11,RP11-193H5.5,MTND6P15,MTND5P18,RP11-193H5.1
1	168290645	168375973	Gain	0.0350386	RP5-1059H15.1,MIR557,RP5-968D22.1
2	119648815	119743801	Gain	0.0496022	RP11-77A13.1,MARCO
13	93094174	93178205	Gain	0.0216849	MIR548AS,GPC5-IT1,GPC5
3	97217571	97331077	Gain	0.0349244	EPHA6
5	147434057	147673733	Loss	0.0238422	HMGN1P16,SPINK14,CTC-295J13.3,SPINK13,SPINK5,SPINK6,RP11-373N22.3
13	34656572	34742419	Gain	0.0149842	VDAC1P12,SNORA25
11	86555189	86795384	Loss	0.00127277	OR7E2P,FZD4,HNRNPCP8,RP11-736K20.5,RP11-736K20.6,PRSS23,TMEM135
20	44702167	44791972	Gain	0.000297863	CD40,RPL13P2,NCOA5
20	10923996	11033800	Gain	0.0262133	RP11-103J8.2,C20orf187,RP11-103J8.1
20	24935719	25065518	Gain	0.0216367	RNU6-1257P,VSX1,CST7,APMAP,ACSS1
1	229821753	229922367	Gain	0.0179843	RP11-108F13.2,HMGB1P26
20	41989206	42092197	Gain	0.000297863	RP5-862K6.4,RNU6-743P,EIF4EBP2P1,Y_RNA,SRSF6
9	118070260	118173997	Gain	0.0040814	2022-12-01
9	100692935	100823084	Gain	0.0040814	RP11-535C21.3,RNU6-918P,HEMGN,ANP32B,NANS
20	30052905	30154237	Gain	0.00358101	DEFB124,LINC00028,RP3-324O17.4,HM13-IT1,REM1,HM13
13	93692694	93813491	Gain	0.0216849	LINC00363
5	148569683	148819291	Loss	0.0238422	PCYOX1L,RP11-394O4.3,AC131025.8,MIR143,MIR145,AFAP1L1,GRPEL2,GRPEL2-AS1,MIR143HG,ABLIM3,RP11-331K21.1,AC012613.2,IL17B
11	34276154	34530172	Loss	0.0349244	RP1-53C18.3,CIR1P3,AL137224.1,RP1-145M24.1,ELF5,ABTB2,CAT
20	41786039	41910016	Gain	0.000297863	RN7SL666P,PPIAP21,RP1-269M15.3,PTPRT
9	125068858	125154313	Gain	0.0040814	RP11-498E2.7,RP11-498E2.8,RP11-498E2.9,AL162424.1,PTGS1,MRRF
7	36751854	36850413	Gain	0.0442581	RP11-85E16.1,AC007349.5,AC007349.4,AOAH
2	114428706	114516493	Gain	0.0496022	AC017074.1,RNU6-744P,MIR4782,AC017074.2,SLC35F5
9	117829449	117916008	Gain	0.0040814	RP11-523L1.2,TNC,1-Dec
13	45743920	45831181	Gain	0.0216367	KCTD4,GTF2F2
20	13198312	13304816	Gain	0.0262133	ISM1-AS1,RP5-1077I2.3,ISM1,TASP1
9	112484136	112585874	Gain	0.0040814	RP11-406O23.2,PALM2,PALM2-AKAP2,AKAP2
17	31838203	31935821	Gain	0.0353679	RP11-31I22.1,RP11-31I22.4,RP11-31I22.3,ASIC2
20	5982605	6070440	Gain	0.0178397	RN7SL498P,CRLS1,FERMT1,LRRN4
11	33841740	34092762	Loss	0.0349244	RP11-646J21.2,AC132216.1,LMO2,CAPRIN1
2	122479610	122574850	Gain	0.0496022	NIFK,TSN,RP11-416H1.1,NIFK-AS1,AC018737.3
20	12790724	12919860	Gain	0.0262133	RP5-1069C8.3,RP5-1069C8.2
20	22967949	23060257	Gain	0.0158	SSTR4,THBD,CD93,RP4-753D10.5,RP4-753D10.3
13	74249827	74378258	Gain	0.0093328	KLF12
20	10369582	10472593	Gain	0.0262133	MKKS,SLX4IP
13	73929289	74056605	Gain	0.0093328	MARK2P12,LINC00393
20	24558667	24681352	Gain	0.0216367	RP5-860P4.2,SYNDIG1
1	227007183	227112972	Gain	0.0310969	PSEN2,ADCK3
1	164945827	165036995	Gain	0.0310969	RNU6-755P,AL390119.1
1	164825008	164945515	Gain	0.0310969	RP11-403P14.1,PBX1
1	166456477	166579183	Gain	0.0310969	RP11-276E17.2,FMO8P,FMO9P
12	14218591	14463829	Loss	0.047587	RP11-72J9.1,RP11-298E10.1,RN7SL46P,RP11-134N1.2,MRPS18CP4,RNU6-491P,GNAI2P1
18	36611282	36849277	Loss	0.00223457	RNU6-706P,LINC00669
5	169628810	169755109	Gain	0.0230953	C5orf58,LCP2,CTB-114C7.4
20	20816899	20900617	Gain	0.015467	MRPS11P1
1	156304329	156397981	Gain	0.0310969	TSACC,RP11-139I14.2,MIR9-1,CCT3,RHBG,C1orf61
17	60580395	60695995	Gain	0.0298204	RP11-464D20.2,RP11-464D20.6,TLK2
5	169444364	169537129	Gain	0.0230953	MIR378E,FOXI1,DOCK2
21	35525016	35647853	Gain	0.0230953	LINC00310,AP000320.7,AP000318.2
20	21019305	21115141	Gain	0.0221538	RPL24P2,LINC00237,PLK1S1
18	44803843	45032438	Loss	0.00223457	MIR4527,RP11-157P23.2,CTD-2130O13.1
13	36058039	36144888	Gain	0.0306693	AL390071.1,NBEA
7	14949314	15061958	Gain	0.0151315	AC006045.3,DGKB
13	36314722	36399658	Gain	0.0306693	DCLK1
1	208140164	208264900	Gain	0.00616225	PLXNA2
13	26080503	26173653	Gain	0.0306693	RNU6-78P,ATP8A2
18	28396568	28628256	Loss	0.00178401	RNU6-857P,RP11-25I11.1,DSC3
7	16632234	16729095	Gain	0.0151315	GS1-166A23.2,BZW2,ANKMY2
13	36455226	36581733	Gain	0.0306693	DCLK1
18	5099315	5345623	Loss	0.00515471	RP11-190I17.4,RP11-835E18.5,LINC00526,RP11-835E18.4,CTD-3096M3.1,C18orf42,RP11-190I17.2,ZBTB14,LINC00667
9	114479036	114563069	Gain	0.0023226	C9orf84
19	41318306	41445949	Gain	0.047587	CYP2F2P,CTC-490E21.10,CTC-490E21.13,CTC-490E21.12,CYP2A6,CYP2A7,CYP2G1P,CYP2B7P
18	50451398	50698925	Loss	0.000191149	AC090660.1,DCC
2	168558673	168669342	Gain	0.0314804	CTAGE14P
19	34692587	34820320	Gain	0.047587	RPL29P33,LSM14A,KIAA0355
9	115219142	115331815	Gain	0.0023226	HSDL2,C9orf147,KIAA1958
9	115100144	115218873	Gain	0.0023226	RP11-432F4.2,HSDL2,C9orf147
3	169293102	169376289	Gain	0.0023226	RP11-3K16.2,MECOM
5	169869645	169992900	Gain	0.0230953	CTB-147C13.1,KCNIP1
21	34439736	34559624	Gain	0.0230953	OLIG1,AP000290.7,C21orf54,AP000289.6,AP000282.2
11	5262634	5511986	Loss	0.0295474	HBBP1,CTD-2643I7.1,HBG1,OR51AB1P,OR51B4,OR51B3P,OR51B2,OR51B8P,OR51B5,OR51B6,AC104389.31,AC104389.32,OR51M1,OR51J1,OR51Q1,OR51K1P,OR51I1,OR51I2,OR51A10P,OR52D1,HBG2,HBE1,AC104389.28
18	46605630	46839206	Loss	0.00223457	RP11-30L3.2,RP11-15F12.3,DYM
13	79227167	79325738	Gain	0.00684491	AL139319.1,RNF219
2	144868811	144989492	Gain	0.049089	GTDC1
18	43867312	44115134	Loss	0.00223457	LOXHD1,RNF165
13	78730023	78850176	Gain	0.00684491	RP11-203P2.2,RNF219-AS1
17	62279812	62407006	Gain	0.0298204	RPL31P57,TEX2
17	61526079	61624549	Gain	0.0298204	RP11-269G24.6,CTD-2501B8.5,ACE,ACE,ACE3P,KCNH6
17	25363800	25487139	Gain	0.0310969	VN1R71P,TUFMP1,RP11-260A9.4
7	32746404	32832125	Gain	0.0227997	ZNRF2P1,MIR550A2,RP11-225B17.2,RP11-225B17.1,SNORA31,AVL9,DPY19L1P1
20	35267039	35392347	Gain	0.00203077	Y_RNA,AL132768.1,NDRG3,SLA2,DSN1
20	31176428	31267648	Gain	0.00203077	RP11-410N8.1,C20orf203,RP11-410N8.4
20	31023756	31144462	Gain	0.00203077	RP5-1184F4.5,ASXL1,C20orf112
3	138177765	138273384	Gain	0.00653884	ESYT3,CEP70
20	33442250	33529260	Gain	0.00203077	GGT7,ACSS2,GSS
1	247065433	247155824	Gain	0.00744067	ZNF695,AHCTF1,ZNF670
20	45529426	45622854	Gain	0.000145464	RP11-323C15.2,EYA2
13	20645045	20775568	Gain	0.0307936	KRR1P1,LINC01072,PPIAP28,LINC00556,GJB2,GJA3,ZMYM2
19	31135677	31261896	Gain	0.00653884	CTC-565M22.1,ZNF536
13	20527411	20642310	Gain	0.0307936	ZMYM2
20	22530602	22646117	Gain	0.0227997	FOXA2,RP4-788L20.3,LINC00261
20	32050905	32140464	Gain	0.00203077	CBFA2T2
9	123477729	123574946	Gain	0.00653884	AHCYP2,RP11-27I1.4,RP11-27I1.6,FBXW2
20	24079675	24172288	Gain	0.0307936	RP5-1100I6.1
5	179110851	179342959	Loss	0.0484222	LTC4S,MGAT4B,MIR1229,RN7SKP150,Y_RNA,CTC-241N9.1,CANX,HMGB3P22,SQSTM1,C5orf45,MAML1,RNF130,TBC1D9B
20	49024826	49136595	Gain	0.000145464	RN7SL636P,COX6CP2,PTPN1
20	16547367	16670633	Gain	0.00650445	RPLP0P1,Y_RNA,RPL7AL3,KIF16B
13	97071111	97192102	Gain	0.0307143	HS6ST3
13	47382043	47506973	Gain	0.0307143	HTR2A-AS1,HTR2A
20	48634777	48737514	Gain	0.000145464	TRERNA1,UBE2V1,TMEM189-UBE2V1,TMEM189
13	95920796	96046669	Gain	0.0307143	RNY3P8,RNY4P27,MEMO1P5,ABCC4
13	96050927	96150044	Gain	0.0307143	CLDN10-AS1,CLDN10
17	38846470	38943319	Gain	0.0154219	KRT24,KRT223P,KRT25,KRT27,KRT26
7	1954733	2067726	Gain	0.0230702	MAD1L1
13	72176753	72264582	Gain	0.00185447	H3F3BP1,DACH1
13	69549956	69642572	Gain	0.00684222	ZDHHC20P4
1	238665223	238775825	Gain	0.00616225	RP11-177F15.1
9	128858795	128987480	Gain	0.018092	RP11-343J18.2
13	42657094	42754522	Gain	0.0306693	AL139328.1,DGKH
17	38264854	38355832	Gain	0.0154219	AC068669.1,MSL1,CASC3,RAPGEFL1
1	236802187	236897375	Gain	0.00189251	ACTN2
17	65647063	65764904	Gain	0.0154219	SNORA38B,NOL11,PITPNC1
13	40118108	40242370	Gain	0.0306693	AL512505.1,MIR4305,LHFP,COG6
1	240711695	240820515	Gain	0.00468996	RP11-467I20.4,RP11-467I20.6,RP11-467I20.3,RNU5F-8P,RP11-467I20.5,GREM2
1	235859714	235976651	Gain	0.00189251	LDHAP2,LYST
20	31949054	32047627	Gain	0.00203077	RN7SL511P,SNTA1,CDK5RAP1
9	17210039	17296543	Gain	0.049089	CNTLN
20	16124097	16211852	Gain	0.00619893	PPIAP17
13	102179376	102307042	Gain	0.0309077	ITGBL1
1	238474116	238582573	Gain	0.00189251	RNU6-725P
20	32693610	32791520	Gain	0.00203077	RPS2P1,EIF2S2,ASIP,RALY
13	74406342	74516339	Gain	0.00626668	KLF12
20	33031971	33132364	Gain	0.00203077	ITCH-IT1,MIR644A,FDX1P1,Y_RNA,DYNLRB1,ITCH
20	60806751	60923132	Gain	0.000202502	RP11-157P1.4,MIR4758,ADRM1,LAMA5,OSBPL2
9	71827381	71935577	Gain	0.0295474	AL358113.1,TJP2
17	33825497	33947104	Gain	0.0235086	RP11-1094M14.8,RP11-1094M14.4,RP11-1094M14.10,RP11-1094M14.12,RP11-1094M14.14,RP11-1094M14.1,SNORD7,PEX12,CTC-507E2.2,RP11-1094M14.5,SLFN14,RP11-1094M14.11,SLFN12L,AP2B1
17	37147358	37253064	Gain	0.0235086	RP1-56K13.6,RP1-56K13.5,CTD-2206N4.2,CTD-2206N4.1,AC091178.1,LRRC37A11P,CTD-2206N4.4,PLXDC1
2	155282824	155370862	Gain	0.0155531	AC009227.3,AC009227.2,GALNT13
9	90905263	91011724	Gain	0.018092	RP11-350G13.1,U3,SPIN1
17	33947105	34045986	Gain	0.0235086	CTC-507E2.1,AP2B1
7	34111660	34199097	Gain	0.032006	BMPER
7	33954167	34059111	Gain	0.032006	BMPER
13	76521955	76613555	Gain	0.00291528	LINC01034
13	73308901	73402821	Gain	0.00262229	BORA,DIS3,PIBF1
11	10157857	10403538	Loss	0.0295474	RP11-351I24.3,RP11-351I24.1,ADM,RP11-748C4.1,SBF2,AMPD3
13	85554591	85664467	Gain	0.0150632	LINC00375
19	31290599	31390463	Gain	0.0155531	CTC-400I9.2
13	68462331	68578907	Gain	0.00451093	OR7E111P,OR7E33P
3	157960300	158076068	Gain	0.0013101	RP11-113A11.1,RSRC1
9	73545157	73638538	Gain	0.0295474	TRPM3
2	101244759	101342685	Gain	0.049089	NANOGNBP1,AC092168.3,AC092168.4
9	90773397	90896429	Gain	0.018092	RP11-1E11.1,RP11-1E11.2
20	17617531	17714318	Gain	0.0294144	RRBP1,BANF2
1	219631863	219741839	Gain	0.00744067	RP11-95P13.2
2	106481446	106587547	Gain	0.0496022	AC009505.4,NCK2
17	25653086	25744158	Gain	0.0458959	RP11-173M1.5,RP11-173M1.4,RP11-578C11.2
1	245549962	245675778	Gain	0.00744067	KIF26B
13	60227365	60335145	Gain	0.00450528	DIAPH3
11	47141931	47394304	Loss	0.0074303	RP11-390K5.3,RP11-390K5.6,RP11-390K5.1,RN7SL772P,RP11-17G12.2,RP11-17G12.3,PACSIN3,DDB2,ACP2,NR1H3,MYBPC3,SPI1,MADD,C11orf49,ARFGAP2
17	37663986	37789431	Gain	0.0279113	RNU6-233P,AC087491.2,PPP1R1B,CDK12,NEUROD2
17	79155017	79247798	Gain	0.0458959	RP11-455O6.2,ENTHD2,AC027601.1,C17orf89,AATK-AS1,SLC38A10,AZI1
13	60450643	60569375	Gain	0.00450528	DIAPH3
2	153251477	153347813	Gain	0.0155531	FMNL2
7	2929427	3031018	Gain	0.0218635	AC004906.3,CARD11
13	57447371	57562127	Gain	0.00291634	RN7SKP6
17	37813856	37923373	Gain	0.0458959	TCAP,PNMT,MIR4728,MIEN1,RP11-94L15.2,STARD3,PGAP3,GRB7,ERBB2,IKZF3
13	59046767	59134824	Gain	0.00291634	RNY4P29,CTAGE16P
3	150388599	150496091	Gain	0.0013101	SIAH2-AS1,FAM194A,RP11-103G8.2,RP11-103G8.1,SIAH2
13	75983762	76071026	Gain	0.00291528	TBC1D4
20	49712590	49841432	Gain	0.000145464	RPSAP1,AL035457.1
2	153353157	153439418	Gain	0.0155531	RP11-17G11.1,FMNL2
20	21700645	21785055	Gain	0.032006	SLC25A6P1,RPL41P1
18	32599572	32853049	Loss	0.0069134	ZNF397,ZSCAN30,MAPRE2
21	34792665	34889868	Gain	0.00705576	AP000301.1,RPS5P3,AP000302.58,DNAJC28,IFNGR2,TMEM50B,GART
7	7353762	7455911	Gain	0.0218635	COL28A1
3	166391465	166503120	Gain	0.0023226	PSAT1P4,RP11-450H5.3
3	165960319	166073920	Gain	0.0023226	RP11-12N13.1
11	9917162	10157856	Loss	0.047587	RP11-1H15.1,RP11-1H15.2,SBF2
7	7970015	8059233	Gain	0.0218635	AC009473.1,AC006042.7,AC006042.8,RPA3-AS1,GLCCI1
9	90171521	90276908	Gain	0.018092	DAPK1
20	19396628	19525982	Gain	0.00466748	SLC24A3
2	100220418	100307684	Gain	0.0314804	AFF3
9	126944378	127050543	Gain	0.00710295	RP11-121A14.2,RP11-121A14.3,NEK6
3	168826359	168950858	Gain	0.0023226	MECOM
3	136652939	136740993	Gain	0.0023226	NCK1,IL20RB-AS1,IL20RB
13	91099465	91195864	Gain	0.00688413	LINC01049
11	9044971	9280462	Loss	0.047587	MIR5691,KRT8P41,RP11-5L12.1,RP11-467K18.2,SCUBE2,DENND5A
1	214514361	214635596	Gain	0.00468996	RP11-176D17.3,PTPN14
5	130224744	130335160	Gain	0.0230953	RP11-114H7.1,RP11-114H7.2
2	100307875	100401000	Gain	0.0314804	AFF3
18	76170411	76420907	Loss	0.000109635	RP11-451L19.1,RP11-123I22.1,Y_RNA
19	43059964	43148255	Gain	0.047587	CEACAMP2,CEACAMP1,CEACAM1,CEACAM8,LIPE-AS1
2	158823388	158940264	Gain	0.0155531	RNU6-932P,PTP4A1P1,UPP2
13	58276835	58405723	Gain	0.00451093	PCDH17
2	148536947	148631534	Gain	0.0155531	AC009480.4,ACVR2A
2	147163193	147262072	Gain	0.049089	AC093084.1
7	28190121	28301101	Gain	0.0218635	JAZF1-AS1,JAZF1
9	125552282	125673676	Gain	0.00710295	OR1K1,KRT18P67,SNORD90,ZBTB6,RC3H2,PDCL
18	10660859	10901807	Loss	0.00233746	RP11-856M7.2,RP11-21G15.1,RP11-856M7.1,RP11-513M1.1,PIEZO2
3	145449826	145553174	Gain	0.0013101	RPL21P39
13	86665093	86758587	Gain	0.0150632	RP11-30L8.1
20	19308322	19396310	Gain	0.00308321	AL049647.1,SLC24A3
5	177415208	177649986	Loss	0.0318259	RP11-889L3.1,N4BP3,NHP2,RP11-889L3.4,GMCL1P1,PROP1,RMND5B,HNRNPAB,PHYKPL,FAM153C
20	60980408	61065194	Gain	9.78e-05	RP5-908M14.5,RP13-379O24.3,CABLES2,RBBP8NL,GATA5
9	126664663	126756640	Gain	0.00710295	DENND1A
16	11757092	11984179	Loss	0.0230953	RP11-490O6.2,BCAR4,RP11-166B2.3,SNN,ZC3H7A,RSL1D1,RP11-166B2.8,GSPT1,TXNDC11
16	13959102	14212714	Loss	0.0230953	RPS26P52,CTD-2135D7.3,CTD-2135D7.4,CTD-2135D7.5,ERCC4,CTD-2135D7.2,MKL2
2	150699859	150793155	Gain	0.0155531	AC007364.1,AC144449.1
3	127028930	127149771	Gain	0.00710295	RP11-88I21.2
11	1681293	1928614	Loss	0.0295474	AP006285.7,FAM99B,AP006285.6,KRTAP5-6,CTSD,AC068580.6,AC068580.5,AC068580.1,AC068580.7,RPL36AP39,AC139143.2,TNNI2,MIR4298,AC051649.12,C11orf89,LINC01150,FAM99A,AP006285.1,IFITM10,RP11-295K3.1,SYT8,LSP1
9	127119172	127245411	Gain	0.00710295	GPR144,NR5A1,PSMB7
18	53567820	53813380	Loss	0.000328366	RP11-456O19.5,SNORA73,RP11-456O19.3,RP11-214L13.1,RP11-456O19.4,CTD-2008L17.1,CTD-2008L17.2,RP11-456O19.2
1	174805039	174911406	Gain	0.0207575	NDUFAF4P4,RP1-102G20.2,RP1-102G20.4,RABGAP1L-IT1,RP1-102G20.5,RABGAP1L
9	119246425	119369191	Gain	0.0109391	RP11-67K19.3,RP11-264C15.2,ASTN2
9	34272090	34382817	Gain	0.038105	RNU2-50P,AL353662.4,SERPINH1P1,KIF24,KIAA1161,C9orf24,NUDT2
21	34971457	35072689	Gain	0.0415716	AP000304.12,CRYZL1,ITSN1
20	52127043	52230909	Gain	0.000509244	Y_RNA,RP4-724E16.2,ZNF217,AC005808.3
20	17505952	17600022	Gain	0.0415378	RN7SKP69,BFSP1,RP11-462D18.2,RRBP1,DSTN
20	38344300	38438771	Gain	0.000586425	RP5-1031J8.1
20	59351872	59437810	Gain	0.000673974	RP11-151E14.1
18	71610943	71840303	Loss	0.000555643	TIMM21,FBXO15,RP11-25L3.3
9	98900154	99002854	Gain	0.0109391	EIF4BP3,AL160269.1,HSD17B3
5	179006305	179110850	Gain	0.0415716	C5orf60,AC136604.1,RP11-1379J22.5,CBY3,RUFY1,RP11-1379J22.2,CANX,HMGB3P22,HNRNPH1
5	135128036	135244495	Gain	0.0413305	AC011431.2,MIR5692C1,AC114296.1,IL9,RP11-119J18.1,SLC25A48,GS1-39E22.2,GS1-39E22.1
9	3631104	3727379	Gain	0.038105	RP11-509J21.2,RP11-509J21.3,RP11-509J21.4,RP11-509J21.1
13	39343925	39427656	Gain	0.0216153	RNU6-56P,AL590007.1,FREM2-AS1,FREM2
5	127422925	127509009	Gain	0.0413305	KDELC1P1,SLC12A2
20	13306325	13416915	Gain	0.0184492	GAPDHP2,TASP1
2	214887023	215001225	Gain	0.0198618	SPAG16
20	5058791	5153868	Gain	0.0184492	TMEM230,Y_RNA,PCNA,SNORA26,RNA5SP474,CDS2
17	58738718	58838995	Gain	0.0194264	RNU6-623P,RN7SL606P,AC111155.1,Y_RNA,BCAS3,PPM1D
3	175760560	175873812	Gain	0.000406968	EI24P1,RP11-809F4.4,RP11-78E6.1
9	25916354	26017340	Gain	0.038105	RP11-477G9.1
13	26757054	26859546	Gain	0.0102162	RP11-380N8.6,PRKRIRP6,RNF6,CDK8
20	40566626	40662596	Gain	0.000586425	RP5-1121H13.1,RP5-1121H13.3,RP5-1121H13.4
5	148903068	148997955	Gain	0.0413305	RPL29P14,AC021078.1,RNU6-588P,ARHGEF37,CSNK1A1
5	128630593	128881009	Loss	0.0404556	MIR4460,ADAMTS19-AS1,ADAMTS19,CTC-575N7.1
17	27976736	28085485	Gain	0.0124867	RPL21P123,RP11-68I3.2,SSH2
21	32698397	32796332	Gain	0.0413305	TIAM1
20	54781817	54873707	Gain	0.000509244	MC3R,RP11-380D15.2,RP11-380D15.3
14	24246353	24494243	Loss	0.0430087	RN7SKP205,RP11-388E23.3,DHRS4-AS1,LINC00596,DHRS4-AS1,DHRS4,DHRS4L2
13	30107963	30212939	Gain	0.0102162	SLC7A1
1	182694499	182813633	Gain	0.011649	RP11-317P15.6,AL513344.1,NPL,DHX9
3	188164033	188291778	Gain	0.000732976	LPP-AS1,LPP
18	60340754	60582902	Loss	0.000555643	RNU6-142P,AC015989.1,AC015989.2,PHLPP1
3	65133041	65226989	Gain	0.0415716	AC104331.1,RP11-543A18.1
20	25837526	25929244	Gain	0.0139459	CFTRP1,FAM182B
1	180803547	180895239	Gain	0.0207575	RP11-46A10.2,KIAA1614,XPR1
18	65539128	65791455	Loss	0.00109434	RP11-526H11.1,RP11-659F24.1,RP11-638L3.1
3	76498608	76607579	Gain	0.0415716	ROBO2
13	25542272	25666239	Gain	0.0428052	RPL34P27,LSP1,TPTE2P1
2	206206244	206307912	Gain	0.038105	PARD3B
20	57047666	57131000	Gain	0.000346926	APCDD1L,APCDD1L-AS1
13	113268018	113371938	Gain	0.0428052	C13orf35,ATP11A
13	92753853	92870983	Gain	0.0102944	FABP5P4,GPC5
5	148386222	148516012	Gain	0.0413305	RNU6-732P,MIR584,RN7SKP145,CTC-529P8.1,SH3TC2
5	148287178	148386221	Gain	0.0413305	RP11-44B19.1,SH3TC2
3	188387013	188483275	Gain	0.000732976	MIR28,LPP
9	26915926	27009100	Gain	0.038105	RP11-337A23.3,PLAA,IFT74,LRRC19
1	180896903	181012971	Gain	0.0207575	RP11-46A10.4,RP11-46A10.6,RP11-46A10.8,KIAA1614,RP11-46A10.5,AL162431.1,STX6,MR1
9	97415910	97536765	Gain	0.0109391	C9orf3
3	65580759	65692006	Gain	0.0415716	ILF2P1,MAGI1
18	60112246	60340753	Loss	0.000555643	RN7SL705P,ZCCHC2
5	145067015	145156938	Gain	0.0413305	CTB-78O21.1,PRELID2
2	207603536	207696261	Gain	0.038105	MIR3130-1,RP11-95H11.1,FASTKD2,MDH1B
20	59561251	59680542	Gain	0.000673974	RP5-827L5.2,RP5-827L5.1
2	224070609	224169311	Gain	0.0198618	RN7SL807P
17	34045987	34167197	Gain	0.0124867	RPL17P42,RP1-161P9.5,C17orf50,AC015849.12,AC015849.13,RASL10B,MMP28,TAF15,AC015849.19,AP2B1,GAS2L2
13	102040364	102157476	Gain	0.0430045	ITGBL1,NALCN
3	73608776	73712338	Gain	0.0415716	RNU7-119P,PDZRN3-AS1,RP11-451J24.1,PDZRN3
17	37436966	37540203	Gain	0.0412326	AC005288.1,FBXL20
21	34331883	34437507	Gain	0.0413305	AP000282.3,OLIG2,LINC00945,AP000282.2
7	14125004	14223471	Gain	0.0102944	DGKB
3	77691253	77811910	Gain	0.0415716	ROBO2
14	24612185	24864229	Loss	0.0430087	PSME2,RNA5SP383,IRF9,TSSK4,CHMP4A,AL136419.6,MDP1,TINF2,DHRS1,CIDEB,LTB4R2,LTB4R2,LTB4R,RNU6-802P,RNF31,RP11-468E2.4,IPO4,RP11-468E2.2,TM9SF1,TM9SF1,NEDD8-MDP1,NEDD8,GMPR2,TGM1,RABGGTA,ADCY4,RP11-934B9.3,RIPK3,NFATC4,REC8,NOP9
20	25608304	25693559	Gain	0.0102245	RN7SL594P,MED28P7,ZNF337-AS1,ZNF337
18	57908134	58160899	Loss	0.000555643	MC4R,RP11-396N11.1
20	56016512	56112197	Gain	0.000586425	HMGB1P1,CTCFL
13	101884564	101994998	Gain	0.0430045	NALCN
1	118284902	118411515	Gain	0.0413305	AL390877.1,GDAP2
5	127517603	127627829	Gain	0.0413305	SLC12A2,FBN2
2	209495858	209605762	Gain	0.038105	PTH2R
2	219397815	219513282	Gain	0.0198618	RNU6-136P,U3,RP11-548H3.1,RQCD1,PLCD4,ZNF142,USP37
2	204494698	204590070	Gain	0.0198618	AC125238.2,AC125238.3,CD28
9	95935293	96063689	Gain	0.0109391	WNK2
3	190461989	190587680	Gain	0.000732976	RP11-332P22.2,GMNC
9	97544820	97648587	Gain	0.0109391	MIR2278,RP11-49O14.3,C9orf3
21	35985896	36079492	Gain	0.0413305	RCAN1,CLIC6
20	53657564	53757761	Gain	0.000509244	RPL12P4
20	34700782	34827815	Gain	0.000586425	snoU13,RP11-234K24.3,AL121895.1,AAR2,EPB41L1
18	53820250	54049508	Loss	0.000328366	CTD-2008L17.2
20	5252794	5353419	Gain	0.0184492	UBE2D3P1,RNA5-8SP7,PROKR2
3	64554657	64637823	Gain	0.0415716	ADAMTS9-AS1,ADAMTS9
3	194094111	194177322	Gain	0.000732976	ATP13A3,GP5
2	213876288	213978526	Gain	0.0198618	AC079610.1,IKZF2
20	25355954	25447474	Gain	0.0102129	ABHD12,GINS1,NINL
11	45280203	45521992	Loss	0.0208064	RP11-430H10.3,SYT13,RP11-430H10.1,RP11-430H10.2,RP11-958J22.1,RP11-430H10.4
5	130335161	130429576	Gain	0.0413305	RP11-114H7.3
5	149834718	149932178	Gain	0.0413305	snoU13,CTC-367J11.1,NDST1
20	48145529	48239643	Gain	0.000297863	AL118525.1,PTGIS
17	58604461	58698741	Gain	0.0194264	RP11-15E18.3,RP11-15E18.2,RP11-15E18.1,RP11-15E18.4,PPM1D
18	1280217	1511466	Loss	0.0130424	RN7SKP72,RP11-288C17.3,RP11-288C17.1,LINC00470,RP11-476K15.1
2	186947476	187040402	Gain	0.0123434	AC104058.1,AC097500.2
3	190587681	190702923	Gain	0.000732976	GMNC
3	192481425	192571028	Gain	0.000732976	MB21D2,FGF12
20	56624067	56733027	Gain	0.000346926	AL354984.2,RP13-379L11.1,RP13-379L11.3,C20orf85
2	214222992	214350989	Gain	0.0198618	SPAG16
17	21176222	21276726	Gain	0.0407945	MAP2K3
20	39999174	40095638	Gain	0.000586425	RP4-620E11.5,RP4-620E11.4,CHD6
17	28085486	28185149	Gain	0.0124867	RP11-82O19.2,SNORA70,RPL9P30,RP11-82O19.1,SSH2
3	188539317	188644676	Gain	0.000732976	LPP
20	59076154	59194462	Gain	0.000673974	MIR548AG2,RP5-1043L13.1
9	27226419	27310415	Gain	0.038105	EQTN,TEK,LINC00032
20	17310498	17414361	Gain	0.014228	PCSK2
1	207748868	207854483	Gain	0.011649	CD46P1,RP11-57I17.3,CR1,RP11-78B10.2,CR1L
2	202423705	202509110	Gain	0.0198618	ENO1P4,TMEM237,ALS2CR11
5	135030152	135113671	Gain	0.0413305	AC009009.1,AC011431.1
2	181230513	181349557	Gain	0.0123434	RP11-512G4.1
7	14016939	14124064	Gain	0.0102944	Y_RNA,RPL6P21,ETV1
20	37889503	38012110	Gain	0.000346926	AL121588.1,ATG3P1,RN7SL680P,RN7SL194P
20	37784903	37885574	Gain	0.000346926	RP4-705O1.1
9	31627856	31711929	Gain	0.038105	HMGB3P23
11	44384713	44615526	Loss	0.0208064	RP11-58K22.1,RP11-58K22.2,CD82
18	66013819	66250994	Loss	0.000608407	RP11-128D14.1,AKR1B10P2,RP11-585K6.2
20	4352922	4460430	Gain	0.012802	RP11-307O10.1,RP5-1164C1.2
1	178992448	179081449	Gain	0.0207575	RP11-177A2.5,TOR3A,FAM20B,ABL2
3	125737622	125850597	Gain	0.0122297	RP11-158I23.1,AC117422.1,ALDH1L1-AS1,SLC41A3,RP11-124N2.1,ALDH1L1
13	26173654	26276591	Gain	0.0216153	ATP8A2
18	72641612	72874290	Loss	0.000328366	ZNF407
13	21710858	21813926	Gain	0.0428835	SNORD27,SAP18,RN7SL80P,MRP63,LINC01046,SKA3,RP11-101P17.14
20	13689746	13788881	Gain	0.0184492	NDUFAF5,ESF1
13	50141362	50223519	Gain	0.00685872	RP11-432M24.4,ARL11,RCBTB1
19	36477110	36555844	Gain	0.0392257	SYNE4,SDHAF1,AC002116.8,ALKBH6,AC002116.7,CLIP3,THAP8,WDR62
9	114571666	114637112	Gain	0.0023226	RNU6-1013P
9	71059890	71127723	Gain	0.0295474	PGM5
18	75633791	75858132	Loss	0.000191149	RP11-671C19.2,RNU6-655P,LINC01029
20	16268507	16345233	Gain	0.00414687	KIF16B
17	46564260	46644161	Gain	0.0451248	HOXB1,HOXB2,HOXB-AS1,HOXB-AS2,HOXB3,HOXB-AS3
13	47995252	48078042	Gain	0.0102245	RN7SL700P
17	42968506	43034278	Gain	0.0451248	CCDC103,FAM187A,AC015936.3,CTD-2534I21.8,EFTUD2,KIF18B,GFAP
3	168757487	168826358	Gain	0.0023226	MECOM
17	38355833	38428206	Gain	0.0279113	RNY4P8,WIPF2
7	12437546	12505372	Gain	0.0151315	VWDE
9	38634253	38715864	Gain	0.038105	RP13-198D9.3,RNU6-765P
1	174911758	174984885	Gain	0.0207575	RNU6-307P,CACYBP,RP1-102G20.5,RABGAP1L,MRPS14
9	133696952	133765637	Gain	0.018092	ABL1
9	37375126	37442357	Gain	0.038105	RP11-397D12.4,GRHPR,CHCHD4P3,ZBTB5
20	39919122	39989726	Gain	0.000586425	RN7SL615P,RP3-450M14.1,EMILIN3,LPIN3,ZHX3
1	159050159	159123492	Gain	0.0207575	RAD1P2,AIM2
11	96695595	96917890	Loss	0.00127277	MED28P5
20	30337334	30404273	Gain	0.00358101	RP11-243J16.8,TPX2
20	14041469	14112142	Gain	0.0184492	AIMP1P1,MACROD2
9	17325704	17400622	Gain	0.0198618	CNTLN
20	4772002	4851842	Gain	0.012802	RASSF2,SLC23A2,SNORA31
13	71594688	71665277	Gain	0.00626668	LINC00348
17	55197802	55268753	Gain	0.0451248	AKAP1
17	42096180	42164583	Gain	0.0451248	U3,G6PC3,TMEM101,LSM12,HDAC5
17	55121068	55197801	Gain	0.0451248	RNF126P1,RP11-166P13.3,RP11-166P13.4,AKAP1
2	141165958	141231854	Gain	0.049089	LRP1B
1	240599449	240676115	Gain	0.00744067	AL646016.1,GREM2,FMN2
9	89558025	89638143	Gain	0.018092	GAS1,CDC20P1,RP11-276H19.1,RP11-276H19.2
1	242190730	242272928	Gain	0.00744067	PLD5,TUBB8P6
13	62563131	62640800	Gain	0.0102245	LINC00358
7	4649476	4718888	Gain	0.0218635	FOXK1
3	176456306	176537365	Gain	0.000732976	RNA5SP147,RP11-255G21.1,RP11-644C3.1
21	35647854	35715717	Gain	0.0230953	AP000318.1,AP000320.7,AP000318.2
18	41813491	42036284	Loss	0.00223457	KRT8P5,CTC-782O7.1
20	59005072	59075201	Gain	0.000673974	MIR4533,RP5-1043L13.1
13	44400006	44462984	Gain	0.0306693	LACC1,CCDC122
13	24660012	24723931	Gain	0.0428835	IPO7P2,RP11-307N16.6,SPATA13
13	21598778	21676839	Gain	0.0428835	RNU4-9P,RPS12P23,LATS2
20	58355791	58423061	Gain	0.000673974	PHACTR3
13	83702984	83771146	Gain	0.0102515	RP11-464I4.1
17	26017405	26097131	Gain	0.0458959	RN7SL576P,RP1-66C13.1,RP1-66C13.2,RP1-66C13.3,NOS2
11	39971256	40195308	Loss	0.047587	RP11-40H19.1,LRRC4C
13	21336675	21404823	Gain	0.0428835	N6AMT2,XPO4
7	24244460	24310910	Gain	0.0218635	snoU13,AC004485.3
3	61935038	62012687	Gain	0.0230953	PTPRG
3	129017362	129091023	Gain	0.0109391	H1FX,NUP210P3,RP13-685P2.8,RP13-685P2.7,HMCES,H1FX-AS1
20	12247029	12327528	Gain	0.0184492	RP11-102J14.1
17	79247799	79330161	Gain	0.0458959	SLC38A10,LINC00482,TMEM105
11	68378769	68600104	Loss	0.00011479	CTD-2007L18.5,AP003096.1,GAL,MTL5,PPP6R3,CPT1A
20	17782278	17845526	Gain	0.0415378	AL035045.1
9	117758149	117829448	Gain	0.00710295	TNC
7	6531694	6605957	Gain	0.0218635	GRID2IP
9	100861346	100925278	Gain	0.0040814	TRIM14,CORO2A
7	34771377	34839018	Gain	0.032006	NCAPD2P1,RN7SL132P,NPSR1,NPSR1-AS1
20	58884279	58952537	Gain	0.000673974	RP5-1043L13.1
7	3201290	3276739	Gain	0.0218635	AC073316.2,AC091801.1
3	192399805	192475258	Gain	0.000732976	RNU1-20P,FGF12
18	8331140	8555446	Loss	0.00207362	AP001094.1,RP11-789C17.3,RP11-789C17.5,RFWD2P1,RN7SL50P,AKR1B1P6,RP11-789C17.1,THEMIS3P,PTPRM
1	210709362	210778332	Gain	0.00616225	HHAT
20	12328172	12410864	Gain	0.0184492	PA2G4P2
21	35907217	35977029	Gain	0.0413305	RCAN1
7	6463051	6531693	Gain	0.0230702	FLJ20306,AC072052.7,DAGLB,KDELR2
20	25990442	26073579	Gain	0.0306581	RP4-760C5.3,CTD-2514C3.1,FAM182A
3	143746351	143820561	Gain	0.0013101	C3orf58
2	142240499	142309114	Gain	0.049089	LRP1B
18	75385147	75608673	Loss	0.000191149	RNA5SP461
9	136446965	136530019	Gain	0.0392257	DBH-AS1,LL09NC01-254D11.1,DBH,FAM163B,SARDH
7	13739100	13815845	Gain	0.0151315	AC011288.2
2	190571313	190643256	Gain	0.0123434	Y_RNA,RP11-455J20.3,AC013468.1,OSGEPL1,OSGEPL1-AS1,ORMDL1,ANKAR
9	16848443	16914151	Gain	0.0314804	BNC2
17	55480078	55562150	Gain	0.0451248	RN7SL437P,MSI2
1	240055405	240135771	Gain	0.00744067	CHRM3-AS1,RP11-35L17.3,CHRM3
3	169211671	169293101	Gain	0.0023226	MECOM
17	65576148	65647062	Gain	0.0235086	PITPNC1
17	56024772	56105032	Gain	0.0451248	RP11-159D12.2,VEZF1,RP11-159D12.5,SRSF1,CUEDC1
20	14282453	14353346	Gain	0.012802	FLRT3,RNU6-228P,MACROD2
13	86099846	86168153	Gain	0.0150632	RNU6-72P,LINC00351
17	56336676	56406912	Gain	0.0451248	MPO,LPO,BZRAP1,BZRAP1-AS1
20	21123795	21193652	Gain	0.015467	RPS15AP1,PLK1S1,RP5-872K7.7,RP4-777D9.2
17	59096588	59169174	Gain	0.0451248	RP11-264B14.2,AC005884.1,BCAS3,RP11-264B14.1
9	113171442	113254439	Gain	0.0023226	SVEP1
1	240514611	240596674	Gain	0.00744067	RP11-177F11.1,FMN2
1	192327268	192390472	Gain	0.011649	RGS21
3	136132282	136204436	Gain	0.0023226	RNU6-1284P,STAG1
1	206206612	206283954	Gain	0.00744067	RP11-38J22.3,SNORD60,AVPR1B,C1orf186
17	56437508	56505496	Gain	0.0451248	HSF5,BZRAP1-AS1,RNF43
20	60019748	60086217	Gain	0.000773063	CDH4
17	42223176	42304644	Gain	0.0451248	TMUB2,RP5-882C2.2,C17orf53,ASB16,ASB16-AS1,ATXN7L3,CTB-175E5.7,UBTF
21	35455314	35525015	Gain	0.0230953	RPS5P2,MRPS6,SLC5A3,SLC5A3,AP000320.7
1	202738933	202806239	Gain	0.0136602	SLC25A39P1,RP11-480I12.10,PCAT6,RP11-480I12.4,KDM5B
17	79082862	79155016	Gain	0.0458959	MIR657,MIR338,MIR1250,RP11-149I9.2,AATK,AATK-AS1,BAIAP2
13	88182501	88246999	Gain	0.0150632	MIR4500HG
17	25570387	25653085	Gain	0.0458959	RPL34P31,RPS16P8,MIR4522,RP11-173M1.8,RP11-173M1.3,WSB1
20	22464181	22530601	Gain	0.0158	LINC00261
17	20893572	20972022	Gain	0.0230953	RP11-746M1.1,USP22,RP11-344E13.3
21	35122274	35204569	Gain	0.0415716	AP000304.12,ITSN1
3	185989023	186052294	Gain	0.000732976	DGKG
11	126151422	126370065	Loss	0.00127277	snoU13,RP11-712L6.7,TIRAP,RP11-712L6.5,DCPS,ST3GAL4,KIRREL3
13	73517692	73587757	Gain	0.00414403	PIBF1
1	204383457	204452698	Gain	0.00744067	RP11-739N20.2,PIK3C2B
1	204216411	204284105	Gain	0.00744067	RP11-203F10.5,PLEKHA6
7	7887273	7949712	Gain	0.0218635	AC006465.4,RNU6-534P,RPA3-AS1
2	145675769	145743609	Gain	0.049089	TEX41
[truncated: 4,791 more rows]
