# Supplementary material for: Integrative multi-omics analysis identified FUT9 and MS4A3 as novel immune-phenotype and prognosis biomarkers for colorectal cancer and analyze the role of FUT9 in oncoimmunology
Source: Research Square preprint supplement (doi:10.21203/rs.3.rs-8306096/v1), 2025-12-09
Supplement: Supplementary file 4 [file e52754e9c9fb17e6e4db59f9.xlsx]

## Sheet: Supplementary Table 1
Ensembl_ID	baseMean	log2FoldChange	lfcSE	stat	pvalue	padj	sig	gene	chrom	chromStart	chromEnd	strand	gene_biotype
ENSG00000154997.8	0.519951	1.0823	0.483843	2.23689	0.0252937	0.14379	Up_In_B2	SEPTIN14	chr7	55793544	55862789	-	NA
ENSG00000256069.6	3.36795	1.19538	0.274616	4.3529	1.34e-05	0.000905215	Up_In_B2	A2MP1	chr12	9228533	9275817	-	transcribed_unprocessed_pseudogene
ENSG00000254180.1	0.996349	1.61501	0.458224	3.5245	0.00042428	0.0100929	Up_In_B2	AB015752.3	chr8	90534611	90620070	-	NA
ENSG00000250496.2	0.752733	2.49299	0.846779	2.94409	0.00323906	0.0382383	Up_In_B2	ABT1P1	chr4	99022311	99023131	-	processed_pseudogene
ENSG00000275912.1	1.05252	2.86183	0.668259	4.28251	1.85e-05	0.00112379	Up_In_B2	AC004837.1	chr7	39685011	39685098	-	processed_pseudogene
ENSG00000280404.1	0.900569	1.63869	0.449318	3.64706	0.00026526	0.0072479	Up_In_B2	AC005086.3	chr7	102161120	102161337	-	pseudogene
ENSG00000248493.1	1.02964	1.3919	0.42189	3.29921	0.000969577	0.0172571	Up_In_B2	AC005351.1	chr5	145997218	145998003	+	processed_pseudogene
ENSG00000268316.1	2.97235	1.03946	0.25463	4.08223	4.46e-05	0.00206225	Up_In_B2	AC006272.2	chr19	51839771	51840945	-	transcribed_unprocessed_pseudogene
ENSG00000264441.1	0.800428	1.25931	0.423794	2.97152	0.00296329	0.0364147	Up_In_B2	AC006539.1	chr19	20027027	20027117	-	processed_pseudogene
ENSG00000223890.1	0.683849	1.3531	0.50314	2.68932	0.0071598	0.065286	Up_In_B2	AC008171.1	chr2	205253304	205253503	-	processed_pseudogene
ENSG00000231794.4	2.8512	1.33195	0.269369	4.94472	7.63e-07	0.000132975	Up_In_B2	AC009542.2	chr7	135198401	135209837	+	transcribed_unprocessed_pseudogene
ENSG00000279816.1	2.79036	1.81617	0.344887	5.26599	1.39e-07	4.03e-05	Up_In_B2	AC010287.1	chr16	58554337	58554935	+	transcribed_processed_pseudogene
ENSG00000249318.1	0.856824	3.11783	1.54554	2.01731	0.0436634	0.199531	Up_In_B2	AC010468.2	chr5	111265809	111270089	-	processed_pseudogene
ENSG00000223539.4	0.900037	3.13386	1.25873	2.4897	0.012785	0.0948073	Up_In_B2	AC011431.1	chr5	135742462	135746356	-	unprocessed_pseudogene
ENSG00000234073.1	1.80301	1.36412	0.382286	3.56831	0.000359295	0.00898772	Up_In_B2	AC011816.1	chr3	36880184	36880729	-	processed_pseudogene
ENSG00000237016.1	1.30475	3.15358	0.682503	4.62061	3.83e-06	0.000388706	Up_In_B2	AC013410.1	chr2	173575110	173576341	-	processed_pseudogene
ENSG00000233729.1	0.798362	2.35311	0.728849	3.22853	0.00124427	0.0204649	Up_In_B2	AC016909.1	chr2	132915557	132931494	+	processed_pseudogene
ENSG00000231557.1	0.537383	1.92563	0.906974	2.12313	0.0337426	0.171857	Up_In_B2	AC018717.1	chr2	198882573	199071791	-	processed_pseudogene
ENSG00000225124.1	0.971617	2.71245	0.733638	3.69725	0.000217944	0.00627303	Up_In_B2	AC023271.2	chr2	203074685	203075142	-	processed_pseudogene
ENSG00000222085.1	0.842637	2.91014	1.09747	2.65169	0.00800901	0.0698602	Up_In_B2	AC024568.1	chr5	78056624	78056746	-	transcribed_processed_pseudogene
ENSG00000225798.1	1.96898	1.13763	0.30028	3.78857	0.000151518	0.00483653	Up_In_B2	AC025918.2	chr15	58889967	58894082	+	processed_pseudogene
ENSG00000233005.1	0.661851	1.10434	0.477298	2.31372	0.020683	0.126984	Up_In_B2	AC067959.1	chr2	21221175	21970959	+	processed_pseudogene
ENSG00000280684.1	1.01606	1.38912	0.403897	3.4393	0.000583224	0.0124728	Up_In_B2	AC069499.1	chr3	108585964	108586229	+	processed_pseudogene
ENSG00000237910.1	0.689527	1.60698	0.543871	2.95471	0.00312959	0.0374578	Up_In_B2	AC073869.7	chr2	131382643	131384061	-	unprocessed_pseudogene
ENSG00000226523.1	0.577187	2.40988	1.17798	2.04576	0.0407799	0.19207	Up_In_B2	AC074375.1	chr2	42680088	42680279	-	processed_pseudogene
ENSG00000215976.1	0.517128	1.28709	0.481949	2.67058	0.00757195	0.0677675	Up_In_B2	AC078819.1	chr12	103985111	103985204	+	processed_pseudogene
ENSG00000230552.4	2.06852	1.40011	0.339251	4.12706	3.67e-05	0.00177847	Up_In_B2	AC092162.1	chr2	176724268	176819310	-	processed_pseudogene
ENSG00000275251.1	0.770394	2.57293	0.849022	3.03046	0.00244182	0.0319212	Up_In_B2	AC098869.1	chr4	40463711	40463803	+	processed_pseudogene
ENSG00000226410.1	1.56443	1.52455	0.391761	3.89152	9.96e-05	0.00364046	Up_In_B2	AC104058.1	chr2	186162949	186163245	-	processed_pseudogene
ENSG00000238149.1	1.39259	1.52117	0.442659	3.43645	0.000589398	0.0125821	Up_In_B2	AC104978.1	chr11	28287235	28287625	-	processed_pseudogene
ENSG00000281267.1	2.25277	1.10664	0.244119	4.53318	5.81e-06	0.000523969	Up_In_B2	AC110602.1	chr17	60659523	60660839	-	processed_pseudogene
ENSG00000228171.1	0.783709	1.11297	0.482511	2.30663	0.0210755	0.128343	Up_In_B2	AC121251.1	chr3	23389661	23389909	-	unprocessed_pseudogene
ENSG00000214525.4	0.740012	1.05042	0.36887	2.84767	0.00440408	0.047159	Up_In_B2	AC130709.1	chr2	68528241	68529452	-	processed_pseudogene
ENSG00000227309.1	3.29004	1.76357	0.394262	4.47309	7.71e-06	0.000632891	Up_In_B2	AC140076.1	chr3	17465150	17465510	+	processed_pseudogene
ENSG00000207833.1	1.30938	-1.14543	0.409148	-2.79954	0.00511747	0.0518902	Up_In_A2	AC244157.1	chr22	22792488	22792582	+	unprocessed_pseudogene
ENSG00000277573.1	0.511085	1.22517	0.566531	2.16258	0.0305738	0.16146	Up_In_B2	AC245407.1	chr1	146377104	146377184	-	unprocessed_pseudogene
ENSG00000263751.1	1.99089	-1.04903	0.384021	-2.73171	0.00630073	0.0599897	Up_In_A2	AC246787.1	chr14	105858335	105858412	-	processed_pseudogene
ENSG00000251775.1	4.08029	1.00807	0.22887	4.40455	1.06e-05	0.000766945	Up_In_B2	ACA59	chr2	63883249	63883391	-	NA
ENSG00000153086.12	5.38506	1.06523	0.244055	4.36472	1.27e-05	0.000872038	Up_In_B2	ACMSD	chr2	134838547	134902034	+	protein_coding
ENSG00000173124.13	2.10237	1.95245	0.421972	4.62698	3.71e-06	0.000382605	Up_In_B2	ACSM6	chr10	95194200	95228928	+	protein_coding
ENSG00000111058.6	139.77	1.21542	0.195805	6.2073	5.39e-10	6.73e-07	Up_In_B2	ACSS3	chr12	80936414	81261205	+	protein_coding
ENSG00000267511.1	2.24796	4.55073	1.71506	2.6534	0.00796858	0.0696224	Up_In_B2	ADAD1P2	chr18	50063795	50064440	+	processed_pseudogene
ENSG00000134007.3	3.32017	1.31942	0.295464	4.46558	7.99e-06	0.000635051	Up_In_B2	ADAM20	chr14	70522358	70535015	-	protein_coding
ENSG00000168594.14	0.663989	1.20338	0.389293	3.0912	0.00199351	0.0280428	Up_In_B2	ADAM29	chr4	174829668	174978180	+	protein_coding
ENSG00000187758.6	2.5033	1.61234	0.388481	4.15038	3.32e-05	0.00166936	Up_In_B2	ADH1A	chr4	99276367	99291028	-	protein_coding
ENSG00000166748.11	1.25749	1.06046	0.387207	2.73875	0.00616733	0.0591056	Up_In_B2	AGBL1	chr15	86141996	87029052	+	protein_coding
ENSG00000249089.1	0.719254	2.74445	1.15521	2.37572	0.0175147	0.114516	Up_In_B2	AIG1P1	chr5	39022411	39022558	+	unprocessed_pseudogene
ENSG00000228816.1	2.47778	1.76274	0.344394	5.11839	3.08e-07	7.2e-05	Up_In_B2	AK3P5	chr10	32944481	32944999	+	processed_pseudogene
ENSG00000214992.6	1.01165	1.07707	0.332872	3.2357	0.00121344	0.0201456	Up_In_B2	AKAP17BP	chrX	119249346	119257667	-	unprocessed_pseudogene
ENSG00000228125.2	0.490515	1.79288	0.888149	2.01867	0.0435213	0.199188	Up_In_B2	AKIRIN1P2	chrX	68132868	68133437	+	processed_pseudogene
ENSG00000122787.13	1.41142	1.16529	0.35325	3.29876	0.000971119	0.0172654	Up_In_B2	AKR1D1	chr7	138002324	138117986	+	protein_coding
ENSG00000276889.1	0.891406	1.78384	0.436901	4.08294	4.45e-05	0.00205991	Up_In_B2	AL020997.1	chr1	27809701	27809788	+	processed_pseudogene
ENSG00000277593.1	0.607043	2.34625	1.10154	2.12998	0.0331736	0.170409	Up_In_B2	AL024509.1	chr6	25326110	25326186	+	processed_pseudogene
ENSG00000278392.1	0.870637	1.68184	0.505253	3.32872	0.000872473	0.0161696	Up_In_B2	AL031320.1	chr6	143449603	143449668	-	processed_pseudogene
ENSG00000263473.2	0.479223	2.15981	1.00022	2.15934	0.0308242	0.162061	Up_In_B2	AL035461.1	chr20	5992260	5992353	-	processed_pseudogene
ENSG00000276862.1	0.542387	2.19531	0.852163	2.57617	0.00999028	0.0811879	Up_In_B2	AL139184.1	chr13	44442078	44442127	-	transcribed_processed_pseudogene
ENSG00000279336.1	0.607255	2.0392	0.805345	2.53209	0.0113386	0.0883175	Up_In_B2	AL353662.2	chr9	34201273	34201515	-	processed_pseudogene
ENSG00000280869.1	0.899319	2.34872	0.624476	3.7611	0.000169166	0.0052173	Up_In_B2	AL391994.1	chr1	235245866	235245955	-	processed_pseudogene
ENSG00000151360.8	1.79647	1.16866	0.359404	3.25166	0.00114733	0.0195008	Up_In_B2	ALLC	chr2	3658195	3702671	+	protein_coding
ENSG00000262943.6	29.456	1.23129	0.31208	3.94544	7.97e-05	0.00308685	Up_In_B2	ALOX12P2	chr17	6853861	6954107	+	transcribed_unprocessed_pseudogene
ENSG00000163283.6	19.4486	-1.41088	0.325811	-4.33037	1.49e-05	0.000963125	Up_In_A2	ALPP	chr2	232378534	232382889	+	protein_coding
ENSG00000155754.13	9.96228	1.4967	0.23966	6.24509	4.24e-10	6.57e-07	Up_In_B2	ALS2CR11	chr2	201487425	201619178	-	NA
ENSG00000178522.13	0.796189	1.40014	0.488616	2.86553	0.00416317	0.0455013	Up_In_B2	AMBN	chr4	70592256	70607288	+	protein_coding
ENSG00000243480.6	0.873691	-1.06474	0.527951	-2.01674	0.0437226	0.199621	Up_In_A2	AMY2A	chr1	103616811	103625780	+	protein_coding
ENSG00000219249.2	0.66044	2.45255	0.900621	2.72318	0.00646577	0.0610221	Up_In_B2	AMZ2P2	chr6	158725747	158726803	-	processed_pseudogene
ENSG00000213735.2	1.44887	1.83212	0.425349	4.30733	1.65e-05	0.00103952	Up_In_B2	ANAPC10P1	chr1	52253621	52254176	+	processed_pseudogene
ENSG00000116194.11	102.353	1.18781	0.274122	4.33314	1.47e-05	0.000960432	Up_In_B2	ANGPTL1	chr1	178849705	178871052	-	protein_coding
ENSG00000171819.4	11.2532	1.70493	0.344085	4.95498	7.23e-07	0.000129676	Up_In_B2	ANGPTL7	chr1	11189341	11195981	+	protein_coding
ENSG00000251056.1	0.447314	1.17952	0.498516	2.36607	0.0179783	0.116309	Up_In_B2	ANKRD20A17P	chr4	49502145	49506022	-	unprocessed_pseudogene
ENSG00000261239.5	0.856964	1.20844	0.432976	2.79102	0.00525427	0.052848	Up_In_B2	ANKRD26P1	chr16	46469341	46569097	-	transcribed_unprocessed_pseudogene
ENSG00000229427.1	1.90506	1.58574	0.379304	4.18065	2.91e-05	0.00153543	Up_In_B2	ANKRD26P4	chr13	31311289	31312921	+	processed_pseudogene
ENSG00000163046.14	0.670444	2.02754	0.671267	3.02047	0.00252386	0.0325495	Up_In_B2	ANKRD30BL	chr2	132147591	132257969	-	protein_coding
ENSG00000206199.8	1.81425	1.08178	0.327331	3.30485	0.000950256	0.0170349	Up_In_B2	ANKUB1	chr3	149761105	149968385	-	protein_coding
ENSG00000134343.11	5.69481	1.13357	0.299817	3.78088	0.000156277	0.00493532	Up_In_B2	ANO3	chr11	26309599	26663288	+	protein_coding
ENSG00000244301.4	0.541209	1.12232	0.509256	2.20385	0.0275352	0.151661	Up_In_B2	AOX3P	chr2	200678233	200738781	+	transcribed_unprocessed_pseudogene
ENSG00000216073.3	0.590623	1.4214	0.536014	2.65179	0.00800652	0.0698602	Up_In_B2	AP000870.1	chr11	95990932	95991017	-	processed_pseudogene
ENSG00000237704.1	1.17495	3.59139	1.23605	2.90553	0.00366626	0.041577	Up_In_B2	AP004289.2	chr8	99340305	99341761	-	processed_pseudogene
ENSG00000236583.1	2.01306	1.63217	0.365547	4.46502	8.01e-06	0.000635051	Up_In_B2	AP004290.1	chr8	99233048	99234459	-	processed_pseudogene
ENSG00000215512.8	1.48237	2.25409	0.529207	4.25938	2.05e-05	0.00120524	Up_In_B2	AP005901.1	chr18	15307663	15330282	-	transcribed_unprocessed_pseudogene
ENSG00000173627.7	8.97021	1.2083	0.238872	5.05833	4.23e-07	8.8e-05	Up_In_B2	APOBEC4	chr1	183646404	183653316	-	protein_coding
ENSG00000110245.10	2.89749	-1.30531	0.571387	-2.28445	0.0223449	0.133088	Up_In_A2	APOC3	chr11	116829706	116833072	+	protein_coding
ENSG00000213137.3	1.88004	2.11301	0.434	4.86869	1.12e-06	0.000173562	Up_In_B2	ARF1P2	chr12	120845110	120845647	-	processed_pseudogene
ENSG00000265293.2	5.0986	1.12801	0.241491	4.671	3e-06	0.000334582	Up_In_B2	ARGFXP2	chr17	32150433	32151504	-	processed_pseudogene
ENSG00000249312.1	0.588195	1.77914	0.820982	2.16709	0.0302283	0.160566	Up_In_B2	ARL2BPP4	chr5	130529419	130529889	+	processed_pseudogene
ENSG00000122872.8	0.883612	2.62338	0.680331	3.85604	0.000115241	0.00401936	Up_In_B2	ARL4P	chr10	60684505	60685209	+	pseudo
ENSG00000228431.1	1.00591	1.6385	0.39175	4.18251	2.88e-05	0.00152968	Up_In_B2	ARL5AP3	chr1	68049360	68049745	-	processed_pseudogene
ENSG00000146809.11	0.593682	1.16731	0.481867	2.42246	0.0154156	0.106591	Up_In_B2	ASB15	chr7	123567010	123639481	+	protein_coding
ENSG00000182177.12	0.983134	1.05432	0.398991	2.64246	0.00823054	0.0711902	Up_In_B2	ASB18	chr2	236194872	236264409	-	protein_coding
ENSG00000176009.3	0.544968	1.65613	0.549433	3.01426	0.00257609	0.0330254	Up_In_B2	ASCL3	chr11	8937579	8938211	-	protein_coding
ENSG00000154438.6	0.583974	2.20874	0.794108	2.78141	0.00541241	0.0538281	Up_In_B2	ASZ1	chr7	117363222	117428123	-	protein_coding
ENSG00000224121.1	2.52558	3.13959	0.50573	6.20804	5.37e-10	6.73e-07	Up_In_B2	ATG12P2	chr2	222904640	222905055	-	processed_pseudogene
ENSG00000224451.2	1.34388	3.00452	0.587039	5.1181	3.09e-07	7.2e-05	Up_In_B2	ATP5F1P1	chr13	51598416	51599460	+	pseudo
ENSG00000261424.1	1.08766	1.38444	0.617189	2.24314	0.0248876	0.141957	Up_In_B2	ATP5F1P7	chr16	75709056	75709815	-	pseudo
ENSG00000230482.1	1.19925	1.71144	0.486411	3.51851	0.000433982	0.0102416	Up_In_B2	ATP5G2P3	chr2	197263111	197263535	+	pseudo
ENSG00000225364.1	1.74495	3.71724	0.737158	5.04266	4.59e-07	9.31e-05	Up_In_B2	ATP6V0E1P1	chr5	132948493	132948718	+	processed_pseudogene
ENSG00000249372.1	0.58556	2.41949	1.18138	2.04802	0.0405583	0.191508	Up_In_B2	ATP6V1G1P6	chr5	78222184	78222517	+	processed_pseudogene
ENSG00000107518.15	28.614	1.094	0.245758	4.45153	8.53e-06	0.000660814	Up_In_B2	ATRNL1	chr10	115093365	115948992	+	protein_coding
ENSG00000204195.3	0.789547	1.88768	0.548111	3.44398	0.000573223	0.012348	Up_In_B2	AWAT1	chrX	70234655	70240627	+	protein_coding
ENSG00000229948.2	1.40178	2.59434	0.566496	4.57963	4.66e-06	0.00045277	Up_In_B2	B3GALNT1P1	chr2	69597353	69598951	+	processed_pseudogene
ENSG00000162630.5	97.4292	1.02279	0.245316	4.16928	3.06e-05	0.00159105	Up_In_B2	B3GALT2	chr1	193179045	193186654	-	protein_coding
ENSG00000251237.1	0.781444	1.24369	0.40373	3.08051	0.00206648	0.028678	Up_In_B2	B3GNTL1P1	chr5	52889666	52889954	+	processed_pseudogene
ENSG00000258531.2	1.00806	2.37087	0.5103	4.64605	3.38e-06	0.000356755	Up_In_B2	BANF1P1	chr14	68936602	68936864	+	processed_pseudogene
ENSG00000223828.1	0.807552	1.7278	0.464106	3.72285	0.000196984	0.00580493	Up_In_B2	BANF1P4	chr1	174756850	174757119	-	processed_pseudogene
ENSG00000234332.1	2.47234	1.67688	0.357491	4.6907	2.72e-06	0.000318007	Up_In_B2	BCAS2P2	chr1	100393033	100394026	-	processed_pseudogene
ENSG00000258565.1	1.07124	1.61349	0.41348	3.90222	9.53e-05	0.00351561	Up_In_B2	BLZF2P	chr14	68867857	68869951	-	unprocessed_pseudogene
ENSG00000204113.6	1.1314	2.68465	0.676414	3.96895	7.22e-05	0.0028727	Up_In_B2	BMP2KL	chrX	74185929	74187153	+	processed_pseudogene
ENSG00000270270.1	4.75522	1.01644	0.22574	4.5027	6.71e-06	0.000567376	Up_In_B2	BNIP3P10	chr19	19870723	19871299	-	processed_pseudogene
ENSG00000267641.1	3.14246	1.60897	0.32177	5.00038	5.72e-07	0.000107699	Up_In_B2	BNIP3P16	chr19	20175013	20177063	-	processed_pseudogene
ENSG00000269040.1	2.56713	1.2467	0.278761	4.47229	7.74e-06	0.000632891	Up_In_B2	BNIP3P24	chr19	20784596	20785152	-	processed_pseudogene
ENSG00000268322.1	1.54124	2.74912	0.532056	5.16698	2.38e-07	5.97e-05	Up_In_B2	BNIP3P25	chr19	21318161	21318719	+	processed_pseudogene
ENSG00000268705.1	2.46387	1.63619	0.324832	5.03705	4.73e-07	9.38e-05	Up_In_B2	BNIP3P26	chr19	21521343	21521896	-	processed_pseudogene
ENSG00000271095.1	0.696286	1.84776	0.481281	3.83926	0.000123407	0.00417806	Up_In_B2	BNIP3P28	chr19	21997648	21998840	+	processed_pseudogene
ENSG00000268079.1	0.497708	1.81704	0.787701	2.30676	0.0210682	0.128343	Up_In_B2	BNIP3P30	chr19	22203128	22204003	+	processed_pseudogene
ENSG00000270479.1	0.865953	2.18712	0.589076	3.71281	0.000204973	0.00599426	Up_In_B2	BNIP3P37	chr19	23123188	23124088	-	processed_pseudogene
ENSG00000223974.1	1.76082	2.4449	0.430344	5.68128	1.34e-08	7.93e-06	Up_In_B2	BNIP3P42	chr7	64551498	64552066	+	processed_pseudogene
ENSG00000269431.1	1.54249	2.85944	0.64922	4.40442	1.06e-05	0.000766945	Up_In_B2	BNIP3P8	chr19	23380317	23380876	+	processed_pseudogene
ENSG00000152430.16	1.98269	1.69886	0.33512	5.06941	3.99e-07	8.45e-05	Up_In_B2	BOLL	chr2	197726879	197786762	-	protein_coding
ENSG00000125999.9	3.86678	1.3077	0.536301	2.43837	0.0147537	0.103709	Up_In_B2	BPIFB1	chr20	33273480	33309878	+	protein_coding
ENSG00000186191.7	1.01582	2.64572	0.631915	4.18683	2.83e-05	0.00150597	Up_In_B2	BPIFB4	chr20	33079644	33111751	+	protein_coding
ENSG00000224775.2	0.846767	1.13762	0.472384	2.40825	0.0160294	0.10915	Up_In_B2	BRAFP1	chrX	75582676	75585506	+	unprocessed_pseudogene
ENSG00000235289.1	0.558546	1.26006	0.625906	2.01319	0.0440951	0.2007	Up_In_B2	BRD7P6	chr2	70353010	70355915	+	processed_pseudogene
ENSG00000137948.17	1.84233	1.31079	0.337828	3.88004	0.000104438	0.00375865	Up_In_B2	BRDT	chr1	91949371	92014426	+	protein_coding
ENSG00000233436.6	5.95325	2.2804	0.280723	8.1233	4.54e-16	5.38e-12	Up_In_B2	BTBD18	chr11	57743514	57751781	-	protein_coding
ENSG00000232260.2	3.31023	1.35124	0.279243	4.83896	1.31e-06	0.00019058	Up_In_B2	BTF3L4P1	chr21	17518526	17518993	-	processed_pseudogene
ENSG00000213003.3	3.15102	1.07213	0.301075	3.56101	0.000369436	0.00912172	Up_In_B2	BTF3P12	chr8	70273369	70273837	+	processed_pseudogene
ENSG00000204683.9	2.10572	2.17175	0.426804	5.0884	3.61e-07	7.93e-05	Up_In_B2	C10orf113	chr10	21125763	21146559	-	protein_coding
ENSG00000180116.14	2.0284	2.86641	0.479109	5.9828	2.19e-09	2.08e-06	Up_In_B2	C12orf40	chr12	39626167	39908300	+	protein_coding
ENSG00000184601.9	2.90925	1.24516	0.473867	2.62767	0.00859726	0.0734515	Up_In_B2	C14orf180	chr14	104579684	104590515	+	protein_coding
ENSG00000168260.2	1.57512	1.00607	0.296615	3.39183	0.000694273	0.013872	Up_In_B2	C14orf183	chr14	50083651	50092643	-	NA
ENSG00000278505.3	38.1866	1.78767	0.346046	5.16599	2.39e-07	5.97e-05	Up_In_B2	C17orf78	chr17	37375986	37392708	+	protein_coding
ENSG00000205856.3	0.61581	1.38308	0.431557	3.20486	0.00135126	0.0216979	Up_In_B2	C22orf42	chr22	32149006	32159322	-	protein_coding
ENSG00000188674.9	0.703596	1.21975	0.460322	2.64977	0.00805456	0.0701241	Up_In_B2	C2orf80	chr2	208165343	208190073	-	protein_coding
ENSG00000163632.11	10.9123	1.10715	0.18084	6.12227	9.23e-10	9.95e-07	Up_In_B2	C3orf49	chr3	63819362	63848636	+	protein_coding
ENSG00000224462.2	1.13222	2.05095	0.576499	3.5576	0.000374263	0.00916983	Up_In_B2	C4BPAP1	chr1	207165496	207183910	+	unprocessed_pseudogene
ENSG00000197826.10	0.606157	1.1874	0.478291	2.48259	0.0130432	0.0957916	Up_In_B2	C4orf22	chr4	80335720	80963756	+	protein_coding
ENSG00000164123.6	2.18964	1.52763	0.344101	4.43948	9.02e-06	0.000689916	Up_In_B2	C4orf45	chr4	158893134	159038760	-	protein_coding
ENSG00000234511.7	9.55945	1.00157	0.227728	4.39808	1.09e-05	0.000780189	Up_In_B2	C5orf58	chr5	170232447	170252575	+	protein_coding
ENSG00000039537.12	27.3834	1.30173	0.285218	4.56397	5.02e-06	0.000476185	Up_In_B2	C6	chr5	41142234	41261438	-	protein_coding
ENSG00000021852.11	0.940036	-1.41604	0.600419	-2.35842	0.018353	0.11777	Up_In_A2	C8B	chr1	56929210	56966140	-	protein_coding
ENSG00000271378.1	0.585862	2.00377	0.819617	2.44476	0.0144947	0.102522	Up_In_B2	C8orf59P2	chr5	37130430	37130700	+	pseudo
ENSG00000174038.11	2.06277	1.11064	0.314121	3.5357	0.000406697	0.00974305	Up_In_B2	C9orf131	chr9	35041095	35045991	+	protein_coding
ENSG00000186354.9	9.93458	1.11008	0.232239	4.7799	1.75e-06	0.000235	Up_In_B2	C9orf47	chr9	88990863	88996140	+	protein_coding
ENSG00000225928.2	1.57234	2.79607	0.558693	5.00465	5.6e-07	0.000106181	Up_In_B2	CACYBPP1	chr10	84454679	84456056	-	processed_pseudogene
ENSG00000175868.12	10.4294	1.57478	0.321696	4.89526	9.82e-07	0.000160582	Up_In_B2	CALCB	chr11	14904997	15082342	+	protein_coding
ENSG00000178372.7	1.10403	-1.362	0.465802	-2.92398	0.00345582	0.0399813	Up_In_A2	CALML5	chr10	5498697	5499555	-	protein_coding
ENSG00000058404.18	17.7006	-1.04065	0.240437	-4.32817	1.5e-05	0.000967051	Up_In_A2	CAMK2B	chr7	44217150	44334577	-	protein_coding
ENSG00000163888.3	17.2937	-1.14634	0.200882	-5.70652	1.15e-08	7.01e-06	Up_In_A2	CAMK2N2	chr3	184259213	184261463	-	protein_coding
ENSG00000182533.6	1.56093	1.30988	0.365132	3.58742	0.000333969	0.00858152	Up_In_B2	CAV3	chr3	8733800	8841808	+	protein_coding
ENSG00000214322.3	1.38197	1.07035	0.333052	3.21377	0.00131003	0.0212227	Up_In_B2	CBX1P2	chrX	17099782	17100239	-	processed_pseudogene
ENSG00000250045.2	1.29252	3.24672	0.757413	4.28659	1.81e-05	0.00111193	Up_In_B2	CBX3P3	chr5	112777630	112778161	-	processed_pseudogene
ENSG00000257666.1	1.24845	2.19043	0.479384	4.56925	4.89e-06	0.000468597	Up_In_B2	CBX3P5	chr12	95286318	95286838	-	processed_pseudogene
ENSG00000241535.1	2.0509	2.36162	0.41972	5.62666	1.84e-08	9.9e-06	Up_In_B2	CBX5P1	chr3	88095408	88095968	-	processed_pseudogene
ENSG00000170160.15	12.9456	1.06618	0.341218	3.12463	0.0017803	0.0258637	Up_In_B2	CCDC144A	chr17	16689537	16777881	+	protein_coding
ENSG00000154874.13	25.276	1.15823	0.275345	4.20646	2.59e-05	0.00141106	Up_In_B2	CCDC144B	chr17	18537800	18625617	-	transcribed_unprocessed_pseudogene
ENSG00000154898.14	4.48041	1.16159	0.249583	4.65412	3.25e-06	0.000346041	Up_In_B2	CCDC144CP	chr17	20321164	20403557	+	transcribed_processed_pseudogene
ENSG00000205212.3	1.01966	1.71825	0.446611	3.84732	0.000119419	0.00409285	Up_In_B2	CCDC144NL	chr17	20836447	20896140	-	transcribed_unprocessed_pseudogene
ENSG00000242715.6	7.3267	1.11247	0.290243	3.8329	0.00012664	0.00424942	Up_In_B2	CCDC169	chr13	36222008	36297840	-	protein_coding
ENSG00000255359.2	0.638046	2.13186	0.647411	3.29291	0.000991577	0.0175098	Up_In_B2	CCDC179	chr11	22846931	22860426	-	protein_coding
ENSG00000256681.1	1.60126	2.37046	0.407824	5.81245	6.16e-09	4.17e-06	Up_In_B2	CCDC58P5	chr11	73850469	73851211	-	processed_pseudogene
ENSG00000123171.6	1.25102	1.01957	0.307929	3.31106	0.000929428	0.0168398	Up_In_B2	CCDC70	chr13	51861981	51866232	+	protein_coding
ENSG00000150676.11	2.03177	1.12394	0.392787	2.86146	0.00421692	0.0458889	Up_In_B2	CCDC83	chr11	85855101	85920021	+	protein_coding
ENSG00000229815.1	1.03446	2.77783	0.636595	4.36357	1.28e-05	0.000872038	Up_In_B2	CCNB1IP1P1	chr1	44958557	44959395	+	processed_pseudogene
ENSG00000214998.2	1.15944	1.72732	0.444153	3.88903	0.000100646	0.00366108	Up_In_B2	CCNB2P1	chr7	7909300	7910449	-	processed_pseudogene
ENSG00000223896.2	0.611572	2.50035	1.00772	2.4812	0.0130942	0.0959982	Up_In_B2	CCNJP2	chr1	92755794	92756956	+	processed_pseudogene
ENSG00000248283.2	1.36038	1.89893	0.432264	4.39299	1.12e-05	0.000791606	Up_In_B2	CCNL2P1	chr4	42561457	42562425	-	processed_pseudogene
ENSG00000268992.1	1.36733	3.07814	0.677814	4.54127	5.59e-06	0.000510058	Up_In_B2	CDC42EP3P1	chr19	23384530	23385293	+	processed_pseudogene
ENSG00000234933.1	1.57241	1.99833	0.435867	4.58471	4.55e-06	0.000445535	Up_In_B2	CDC42P1	chr20	34402149	34402696	-	processed_pseudogene
ENSG00000253439.1	2.96164	1.76521	0.298396	5.91567	3.31e-09	2.7e-06	Up_In_B2	CDC42P5	chr5	173085342	173086210	-	processed_pseudogene
ENSG00000229029.2	6.22436	1.01856	0.237168	4.29469	1.75e-05	0.00108047	Up_In_B2	CDCA4P1	chr9	14593577	14594200	+	processed_pseudogene
ENSG00000081138.12	12.4827	1.1162	0.334979	3.33214	0.000861799	0.0160913	Up_In_B2	CDH7	chr18	65750252	65890341	+	protein_coding
ENSG00000113100.8	2.60986	1.64311	0.768865	2.13706	0.0325934	0.168524	Up_In_B2	CDH9	chr5	26880600	27121150	-	protein_coding
ENSG00000184258.6	1.74545	2.0441	0.421698	4.8473	1.25e-06	0.000186681	Up_In_B2	CDR1	chrX	140782405	140784871	-	protein_coding
ENSG00000258546.1	0.871454	1.66374	0.752981	2.20954	0.0271373	0.150097	Up_In_B2	CENPUP2	chr12	25092715	25093900	-	processed_pseudogene
ENSG00000270809.1	1.48524	1.57483	0.437093	3.60297	0.000314602	0.00819936	Up_In_B2	CHCHD2P11	chr13	42181465	42181921	-	processed_pseudogene
ENSG00000213964.3	1.29099	1.49313	0.415127	3.59681	0.00032214	0.00836822	Up_In_B2	CHCHD4P4	chr3	11234256	11234582	-	processed_pseudogene
ENSG00000135902.8	2.08792	1.26873	0.344605	3.68169	0.000231692	0.00657682	Up_In_B2	CHRND	chr2	232525993	232536667	+	protein_coding
ENSG00000232000.2	4.65743	1.55196	0.289309	5.36438	8.12e-08	2.75e-05	Up_In_B2	CLCN3P1	chr9	14987302	15146401	-	transcribed_unprocessed_pseudogene
ENSG00000256660.4	2.64591	1.14675	0.315191	3.63828	0.000274464	0.00742821	Up_In_B2	CLEC12B	chr12	10010627	10018619	+	protein_coding
ENSG00000165682.13	2.95912	1.60774	0.331945	4.84337	1.28e-06	0.000188046	Up_In_B2	CLEC1B	chr12	9985642	10013424	-	protein_coding
ENSG00000236279.5	9.96154	1.0278	0.254791	4.0339	5.49e-05	0.00236135	Up_In_B2	CLEC2L	chr7	139523856	139544984	+	protein_coding
ENSG00000166509.9	3.41256	1.99121	0.464826	4.28378	1.84e-05	0.00112055	Up_In_B2	CLEC3A	chr16	78022515	78066761	+	protein_coding
ENSG00000204140.9	1.0886	1.62278	0.704628	2.30303	0.021277	0.129193	Up_In_B2	CLPSL1	chr6	35781017	35793675	+	protein_coding
ENSG00000163646.9	0.594882	1.61319	0.574771	2.80666	0.00500577	0.0510851	Up_In_B2	CLRN1	chr3	150926163	150972999	-	protein_coding
ENSG00000213816.3	1.2923	-1.61885	0.61454	-2.63424	0.00843259	0.0724359	Up_In_A2	CNN2P4	chr9	42972386	42973289	-	processed_pseudogene
ENSG00000152910.17	1.22154	1.98301	0.480046	4.13088	3.61e-05	0.00176223	Up_In_B2	CNTNAP4	chr16	76277278	76559238	+	protein_coding
ENSG00000251552.1	1.34748	2.13168	0.486096	4.38531	1.16e-05	0.000817548	Up_In_B2	COQ10BP2	chr5	83279921	83280644	-	processed_pseudogene
ENSG00000258956.2	1.17843	-1.20411	0.391421	-3.07625	0.00209622	0.0288544	Up_In_A2	COX4I1P1	chr14	61831861	61832369	-	processed_pseudogene
ENSG00000235967.1	1.46076	3.40101	0.724004	4.6975	2.63e-06	0.000310761	Up_In_B2	COX5BP3	chr7	133727368	133727734	-	processed_pseudogene
ENSG00000172912.4	0.741401	2.64604	0.90631	2.91957	0.00350512	0.040324	Up_In_B2	COX6B1P3	chr22	40569286	40569895	+	processed_pseudogene
ENSG00000238008.1	0.497982	1.62365	0.729037	2.22711	0.0259399	0.145821	Up_In_B2	COX6CP10	chr3	33554636	33554859	+	processed_pseudogene
ENSG00000234144.1	0.718001	1.58933	0.541955	2.93258	0.00336161	0.0392552	Up_In_B2	COX6CP13	chr1	65298755	65298980	-	processed_pseudogene
ENSG00000236041.1	0.65734	2.15521	0.751324	2.86856	0.00412351	0.0451719	Up_In_B2	COX6CP18	chr11	2771356	2771577	+	processed_pseudogene
ENSG00000234274.1	1.05963	2.49308	0.646776	3.85462	0.000115907	0.00402515	Up_In_B2	COX7BP2	chr20	35850674	35850915	-	processed_pseudogene
ENSG00000153002.10	6.35636	-1.15775	0.385669	-3.00194	0.00268267	0.0340787	Up_In_A2	CPB1	chr3	148791102	148860187	+	protein_coding
ENSG00000166569.7	0.460837	1.01411	0.431732	2.34892	0.0188277	0.119409	Up_In_B2	CPLX4	chr18	59275156	59318649	-	protein_coding
ENSG00000163499.10	12.5641	-1.07553	0.26222	-4.10164	4.1e-05	0.00195368	Up_In_A2	CRYBA2	chr2	218990189	218993421	-	protein_coding
ENSG00000183117.16	8.42816	1.52787	0.313092	4.87995	1.06e-06	0.000169504	Up_In_B2	CSMD1	chr8	2935353	4994972	-	protein_coding
ENSG00000223518.5	3.0209	1.59912	0.30151	5.30369	1.13e-07	3.54e-05	Up_In_B2	CSNK1A1P1	chr15	36798596	36818459	-	transcribed_processed_pseudogene
ENSG00000129170.7	0.717445	1.62034	0.45535	3.55846	0.000373031	0.00914911	Up_In_B2	CSRP3	chr11	19182030	19210573	-	protein_coding
ENSG00000181358.3	0.949505	1.05388	0.379833	2.77459	0.00552709	0.0546419	Up_In_B2	CTAGE10P	chr13	49890591	49892998	+	processed_pseudogene
ENSG00000214211.2	0.660805	2.1154	0.700051	3.02178	0.00251296	0.0324618	Up_In_B2	CTAGE14P	chr2	167713663	167716065	-	processed_pseudogene
ENSG00000183230.15	14.8279	1.10885	0.268238	4.13381	3.57e-05	0.00174836	Up_In_B2	CTNNA3	chr10	65912518	67696169	-	protein_coding
ENSG00000251032.1	0.765875	1.72145	0.502758	3.42401	0.000617047	0.0129052	Up_In_B2	CUL1P1	chr5	127784618	127787042	-	processed_pseudogene
ENSG00000189377.7	75.6957	-1.35855	0.350442	-3.87668	0.00010589	0.00378793	Up_In_A2	CXCL17	chr19	42428288	42443048	-	protein_coding
ENSG00000165164.11	4.83392	1.23534	0.315952	3.9099	9.23e-05	0.00342713	Up_In_B2	CXorf22	chrX	35919734	36385319	+	protein_coding
ENSG00000187690.3	0.483876	1.46001	0.658493	2.2172	0.0266096	0.148164	Up_In_B2	CXorf67	chrX	51406915	51408843	+	protein_coding
ENSG00000229217.1	0.52068	1.66887	0.588677	2.83495	0.00458328	0.0484244	Up_In_B2	CYCSP11	chr3	10057973	10058287	-	processed_pseudogene
ENSG00000259547.1	0.672499	2.34538	0.837947	2.79897	0.00512664	0.0519558	Up_In_B2	CYCSP2	chr15	41108878	41109178	+	processed_pseudogene
ENSG00000255379.1	0.772771	2.6953	0.909042	2.96499	0.00302697	0.0367766	Up_In_B2	CYCSP29	chr11	108822333	108822650	-	processed_pseudogene
ENSG00000259513.1	1.78862	2.25546	0.416334	5.41742	6.05e-08	2.24e-05	Up_In_B2	CYCSP38	chr15	60558080	60558401	+	transcribed_processed_pseudogene
ENSG00000229120.2	0.673771	2.56756	1.00841	2.54615	0.0108917	0.0860776	Up_In_B2	CYCSP4	chr1	202369526	202370145	-	processed_pseudogene
ENSG00000235700.1	2.48574	1.30968	0.308261	4.24861	2.15e-05	0.00124127	Up_In_B2	CYCSP52	chr1	157128362	157128671	+	processed_pseudogene
ENSG00000140465.12	5.56693	2.55933	0.41208	6.21075	5.27e-10	6.73e-07	Up_In_B2	CYP1A1	chr15	74719542	74725610	-	protein_coding
ENSG00000165841.8	2.97155	1.24102	0.310363	3.9986	6.37e-05	0.00260991	Up_In_B2	CYP2C19	chr10	94762624	94853260	+	protein_coding
ENSG00000162365.10	1.43015	1.9509	0.470717	4.14454	3.4e-05	0.001693	Up_In_B2	CYP4A22	chr1	47137435	47149741	+	protein_coding
ENSG00000244155.1	0.936852	-2.67434	0.918079	-2.91297	0.00358009	0.04092	Up_In_A2	CYP4F34P	chr13	18741730	18742718	-	unprocessed_pseudogene
ENSG00000215223.3	0.651828	1.52899	0.496566	3.07913	0.00207604	0.0287515	Up_In_B2	CYP51A1P3	chr6	148478693	148480763	+	processed_pseudogene
ENSG00000167910.3	1.37635	1.33858	0.423885	3.15788	0.00158922	0.0239921	Up_In_B2	CYP7A1	chr8	58490178	58500236	-	protein_coding
ENSG00000185610.6	0.973986	1.0586	0.516011	2.05151	0.0402173	0.190727	Up_In_B2	DBX2	chr12	45014672	45051099	-	protein_coding
ENSG00000176566.4	1.0422	3.16139	1.04236	3.03293	0.0024219	0.0317524	Up_In_B2	DCAF4L2	chr8	87870743	87874068	-	protein_coding
ENSG00000189186.9	0.910705	1.30088	0.635459	2.04716	0.0406429	0.191712	Up_In_B2	DCAF8L2	chrX	27590382	27748821	+	protein_coding
ENSG00000237135.1	3.90457	1.1968	0.257138	4.65431	3.25e-06	0.000346041	Up_In_B2	DDX10P1	chr10	30919012	30921235	-	processed_pseudogene
ENSG00000232928.2	7.98918	1.0372	0.256067	4.0505	5.11e-05	0.00224057	Up_In_B2	DDX3P1	chrX	74121012	74131923	+	processed_pseudogene
ENSG00000251571.1	0.559218	1.33229	0.596251	2.23445	0.0254533	0.144196	Up_In_B2	DDX3P3	chr4	103572089	103574082	+	processed_pseudogene
ENSG00000152670.17	0.458109	1.50725	0.509278	2.95958	0.00308058	0.037124	Up_In_B2	DDX4	chr5	55738017	55817157	+	protein_coding
ENSG00000184735.6	2.90265	3.0042	0.977623	3.07297	0.00211943	0.0290558	Up_In_B2	DDX53	chrX	22999961	23003589	+	protein_coding
ENSG00000270751.1	1.79558	2.78458	0.432043	6.44515	1.15e-10	2.74e-07	Up_In_B2	DEAR	chr4	152337655	152338098	+	NA
ENSG00000184210.5	0.765566	1.18379	0.429654	2.75522	0.00586528	0.0570344	Up_In_B2	DGAT2L6	chrX	70177483	70205545	+	protein_coding
ENSG00000104371.4	126.414	1.313	0.310827	4.22423	2.4e-05	0.00133162	Up_In_B2	DKK4	chr8	42374068	42377232	-	protein_coding
ENSG00000152592.12	2.31022	1.01242	0.334635	3.02543	0.0024828	0.032195	Up_In_B2	DMP1	chr4	87650307	87664361	+	protein_coding
ENSG00000137090.10	3.11425	1.27594	0.387041	3.29666	0.000978414	0.0173301	Up_In_B2	DMRT1	chr9	841690	969090	+	protein_coding
ENSG00000064218.4	10.4741	1.06678	0.280837	3.79859	0.000145522	0.00473633	Up_In_B2	DMRT3	chr9	976964	991731	+	protein_coding
ENSG00000220871.1	0.875019	2.5943	0.841146	3.08424	0.00204072	0.028504	Up_In_B2	DNAJC19P6	chr6	89797598	89797877	+	processed_pseudogene
ENSG00000237663.2	0.677976	1.67234	0.57441	2.91141	0.00359805	0.0410659	Up_In_B2	DNAJC19P7	chr1	52252062	52252773	-	processed_pseudogene
ENSG00000224323.2	0.861137	2.57479	0.858892	2.9978	0.00271939	0.0343977	Up_In_B2	DPRXP1	chr2	186488624	186489083	-	processed_pseudogene
ENSG00000264743.2	6.27105	1.24378	0.216432	5.74674	9.1e-09	5.68e-06	Up_In_B2	DPRXP4	chr17	30975387	30975954	+	processed_pseudogene
ENSG00000270652.1	0.453027	1.67654	0.834399	2.00928	0.0445075	0.201844	Up_In_B2	DPRXP5	chr21	36943267	36944125	+	processed_pseudogene
ENSG00000189212.11	3.08564	1.37757	0.273531	5.03626	4.75e-07	9.38e-05	Up_In_B2	DPY19L2P1	chr7	35079989	35186041	-	transcribed_unprocessed_pseudogene
ENSG00000152591.11	0.697493	2.24707	0.675175	3.32813	0.000874298	0.0161696	Up_In_B2	DSPP	chr4	87608529	87616910	+	protein_coding
ENSG00000229048.5	2.21292	1.54204	0.338003	4.5622	5.06e-06	0.000478315	Up_In_B2	DUTP1	chr3	125310881	125311350	+	processed_pseudogene
ENSG00000250473.1	1.27001	3.44654	0.963734	3.57623	0.000348581	0.00882651	Up_In_B2	DUTP7	chr4	51865050	51865535	-	processed_pseudogene
ENSG00000232136.2	0.684272	2.11779	0.587387	3.60543	0.000311632	0.00815782	Up_In_B2	DUXAP7	chr20	18642782	18643634	-	processed_pseudogene
ENSG00000267046.1	3.04998	1.71525	0.340078	5.0437	4.57e-07	9.31e-05	Up_In_B2	E2F3P1	chr17	35490009	35491238	+	processed_pseudogene
ENSG00000230497.2	0.984129	2.8895	0.797469	3.62334	0.000290824	0.00774128	Up_In_B2	EEF1B2P8	chr3	175059361	175060031	-	processed_pseudogene
ENSG00000214360.4	0.564754	1.43361	0.505415	2.83649	0.00456119	0.0482808	Up_In_B2	EFCAB9	chr5	172194172	172203452	+	protein_coding
ENSG00000259404.4	1.16593	1.0003	0.30846	3.24289	0.00118323	0.0198323	Up_In_B2	EFTUD1P1	chr15	84080168	84126604	+	NA
ENSG00000256134.1	1.83693	3.20156	0.57351	5.58239	2.37e-08	1.17e-05	Up_In_B2	EGLN3P1	chr12	15971890	15972609	-	processed_pseudogene
ENSG00000258980.1	0.710668	2.61539	1.2038	2.1726	0.0298102	0.1592	Up_In_B2	EIF1AXP2	chr14	65528830	65529574	-	processed_pseudogene
ENSG00000229875.1	1.13358	2.10485	0.445334	4.72646	2.28e-06	0.00028076	Up_In_B2	EIF1P1	chr9	659986	660326	+	processed_pseudogene
ENSG00000225650.2	1.87946	3.4969	0.5917	5.90992	3.42e-09	2.71e-06	Up_In_B2	EIF2S2P5	chr1	114468315	114469282	+	processed_pseudogene
ENSG00000231564.1	1.28927	1.71889	0.459537	3.74048	0.00018367	0.00553507	Up_In_B2	EIF4A1P11	chr1	179201705	179201926	+	processed_pseudogene
ENSG00000213484.2	1.18906	1.917	0.539249	3.55493	0.000378074	0.00923458	Up_In_B2	EIF4A1P8	chr10	92136875	92138370	+	processed_pseudogene
ENSG00000261336.1	2.75381	2.29827	0.374587	6.13549	8.49e-10	9.95e-07	Up_In_B2	EIF4BP5	chr16	47565090	47566884	-	processed_pseudogene
ENSG00000213384.2	1.91423	4.19714	1.22457	3.42745	0.000609285	0.0128106	Up_In_B2	EIF4E2P1	chr20	20659710	20659964	+	processed_pseudogene
ENSG00000215319.2	1.58009	1.63451	0.386449	4.22957	2.34e-05	0.00131524	Up_In_B2	EIF5P1	chrX	9818239	9819469	-	processed_pseudogene
ENSG00000243986.2	0.774263	1.92736	0.581643	3.31364	0.000920887	0.0167676	Up_In_B2	ENO1P3	chr3	124862094	124863317	-	processed_pseudogene
ENSG00000254527.1	1.44029	2.02815	0.454752	4.4599	8.2e-06	0.00064182	Up_In_B2	ENPP7P12	chr8	12205759	12206389	-	processed_pseudogene
ENSG00000264801.1	4.33888	1.14551	0.258636	4.42906	9.46e-06	0.00071488	Up_In_B2	ERVFRD-3	chr9	21929457	21931073	+	transcribed_processed_pseudogene
ENSG00000269526.1	3.8932	1.36588	0.375471	3.63779	0.000274991	0.00742821	Up_In_B2	ERVV-1	chr19	53013921	53016122	+	protein_coding
ENSG00000268964.1	2.31354	1.01286	0.500463	2.02385	0.0429852	0.197889	Up_In_B2	ERVV-2	chr19	53044738	53051076	+	protein_coding
ENSG00000232757.1	2.53979	1.26953	0.284212	4.46684	7.94e-06	0.000633915	Up_In_B2	ETF1P1	chr6	30031713	30033003	+	processed_pseudogene
ENSG00000240132.1	3.75597	1.47807	0.285566	5.17595	2.27e-07	5.85e-05	Up_In_B2	ETF1P2	chr7	151501878	151503463	+	processed_pseudogene
ENSG00000205186.2	0.822899	1.53232	0.487851	3.14096	0.00168395	0.0248837	Up_In_B2	FABP9	chr8	81458341	81461579	-	protein_coding
ENSG00000179083.6	3.55255	1.32576	0.350276	3.78489	0.000153776	0.00488668	Up_In_B2	FAM133A	chrX	93674013	93712274	+	protein_coding
ENSG00000182230.10	2.02173	1.03082	0.275471	3.74204	0.000182531	0.00550775	Up_In_B2	FAM153B	chr5	176060689	176132258	+	protein_coding
ENSG00000204767.3	8.56116	1.27438	0.287819	4.42771	9.52e-06	0.000716602	Up_In_B2	FAM196B	chr5	169864264	169980740	-	protein_coding
ENSG00000230902.1	0.851874	2.43371	0.736362	3.30504	0.00094963	0.0170349	Up_In_B2	FAM204CP	chr13	75688556	75689197	-	processed_pseudogene
ENSG00000145975.12	4.22727	1.01522	0.246134	4.12468	3.71e-05	0.00178963	Up_In_B2	FAM217A	chr6	4049434	4087344	-	protein_coding
ENSG00000259096.1	2.05321	2.14103	0.404056	5.29883	1.17e-07	3.57e-05	Up_In_B2	FAM35CP	chr14	87952527	87955203	+	pseudo
ENSG00000177138.14	0.834006	1.8112	0.606725	2.98521	0.00283388	0.0353371	Up_In_B2	FAM9B	chrX	9024232	9164639	-	protein_coding
ENSG00000231431.6	2.34059	1.59457	0.510818	3.1216	0.00179872	0.0260441	Up_In_B2	FAR2P4	chr2	131279290	131309068	+	transcribed_unprocessed_pseudogene
ENSG00000275693.1	0.988006	1.45689	0.430512	3.3841	0.000714121	0.014114	Up_In_B2	FAS-AS1	chr10	88992370	88992539	+	NA
ENSG00000163833.7	0.7101	1.64133	0.450469	3.6436	0.000268851	0.00730394	Up_In_B2	FBXO40	chr3	121593119	121630295	+	protein_coding
ENSG00000204952.2	1.37542	1.20193	0.357259	3.36431	0.000767343	0.014954	Up_In_B2	FBXO47	chr17	38936432	38967402	-	protein_coding
ENSG00000227436.1	2.01607	2.19208	0.387604	5.65547	1.55e-08	8.78e-06	Up_In_B2	FCF1P1	chr7	23619333	23622826	+	processed_pseudogene
ENSG00000224727.1	2.62028	1.01742	0.303337	3.35409	0.000796258	0.0152297	Up_In_B2	FCF1P7	chr1	243267257	243268119	-	processed_pseudogene
ENSG00000251111.2	1.16211	2.44689	0.512471	4.7747	1.8e-06	0.000239806	Up_In_B2	FCF1P8	chr4	55351812	55352408	-	processed_pseudogene
ENSG00000181617.5	76.4709	-1.26996	0.345743	-3.67314	0.000239592	0.00673271	Up_In_A2	FDCSP	chr4	70226071	70235252	+	protein_coding
ENSG00000258872.2	2.11968	1.98436	0.410138	4.83826	1.31e-06	0.00019058	Up_In_B2	FDPSP3	chr14	54884849	54886213	-	transcribed_processed_pseudogene
ENSG00000181741.7	3.74138	1.07174	0.227666	4.70751	2.51e-06	0.000300362	Up_In_B2	FDX1P1	chr20	34475924	34476474	-	processed_pseudogene
ENSG00000171557.15	8.06737	-1.12218	0.471399	-2.38054	0.0172873	0.113732	Up_In_A2	FGG	chr4	154604134	154612967	-	protein_coding
ENSG00000143520.6	0.680636	1.71286	0.547826	3.12665	0.00176809	0.0257456	Up_In_B2	FLG2	chr1	152348735	152360006	-	protein_coding
ENSG00000155816.18	21.5891	1.00095	0.27318	3.66406	0.000248252	0.00691088	Up_In_B2	FMN2	chr1	240014348	240475189	+	protein_coding
ENSG00000117507.4	1.31923	1.82867	0.475096	3.84906	0.000118574	0.00406978	Up_In_B2	FMO6P	chr1	171137740	171161568	+	transcribed_unitary_pseudogene
ENSG00000230231.1	0.90235	1.03757	0.308974	3.35811	0.00078477	0.0150829	Up_In_B2	FMO7P	chr1	166474745	166481565	+	unprocessed_pseudogene
ENSG00000223592.2	0.601743	1.40465	0.538846	2.60677	0.00914002	0.0768157	Up_In_B2	FNDC3CP	chrX	78165696	78172422	-	unitary_pseudogene
ENSG00000230022.1	1.5353	1.69239	0.399933	4.23168	2.32e-05	0.00131174	Up_In_B2	FNTAP2	chr13	21530690	21531323	+	processed_pseudogene
ENSG00000171956.6	2.94227	-1.08919	0.284175	-3.83284	0.000126675	0.00424942	Up_In_A2	FOXB1	chr15	60004222	60061730	+	protein_coding
ENSG00000168269.8	13.4377	-1.0853	0.413993	-2.62153	0.00875356	0.0744382	Up_In_A2	FOXI1	chr5	170105897	170109725	+	protein_coding
ENSG00000277737.2	1.41393	1.03858	0.406007	2.55804	0.0105264	0.0842858	Up_In_B2	FP325317.1	chr9	43109628	43127172	-	unprocessed_pseudogene
ENSG00000183090.5	1.67624	1.29373	0.333915	3.87444	0.000106872	0.00381728	Up_In_B2	FREM3	chr4	143577302	143700675	-	protein_coding
ENSG00000165694.8	1.25	1.23661	0.425879	2.90366	0.00368824	0.0417504	Up_In_B2	FRMD7	chrX	132076993	132128020	-	protein_coding
ENSG00000261559.1	1.25211	-1.22158	0.400504	-3.05011	0.00228759	0.0307045	Up_In_A2	FSCN1P1	chr15	34494420	34495900	+	processed_pseudogene
ENSG00000150667.6	46.1786	1.73694	0.197278	8.80454	1.31e-18	3.12e-14	Up_In_B2	FSIP1	chr15	39600031	39782830	-	protein_coding
ENSG00000249302.2	1.4225	2.99839	0.59001	5.08193	3.74e-07	8.13e-05	Up_In_B2	FTH1P24	chr4	139546266	139546727	+	processed_pseudogene
ENSG00000232792.2	1.20721	2.95333	0.665857	4.43539	9.19e-06	0.000696408	Up_In_B2	FTH1P25	chr1	185071567	185072035	-	processed_pseudogene
ENSG00000254984.1	0.806401	1.79114	0.471791	3.79646	0.000146774	0.0047574	Up_In_B2	FTLP6	chr11	66771246	66771667	-	processed_pseudogene
ENSG00000232217.1	0.767552	1.41163	0.445419	3.16921	0.00152856	0.0234095	Up_In_B2	FTLP8	chr13	97986950	97987216	-	processed_pseudogene
ENSG00000172461.9	0.72829	1.51268	0.613035	2.46753	0.0136048	0.0987651	Up_In_B2	FUT9	chr6	96015984	96215612	+	protein_coding
ENSG00000151834.14	296.613	1.00878	0.25739	3.91925	8.88e-05	0.00333504	Up_In_B2	GABRA2	chr4	46248427	46475230	-	protein_coding
ENSG00000109158.9	48.0639	1.42604	0.325266	4.38422	1.16e-05	0.000819185	Up_In_B2	GABRA4	chr4	46918900	46994407	-	protein_coding
ENSG00000182256.11	2.02561	1.69278	0.441623	3.83308	0.000126547	0.00424942	Up_In_B2	GABRG3	chr15	26971282	27541991	+	protein_coding
ENSG00000183185.8	0.616492	2.05815	0.611538	3.36553	0.000763956	0.0149074	Up_In_B2	GABRR3	chr3	97986673	98035304	-	protein_coding
ENSG00000144278.13	19.1887	1.32825	0.30659	4.33233	1.48e-05	0.000961314	Up_In_B2	GALNT13	chr2	153871913	154453849	+	protein_coding
ENSG00000174473.14	41.8554	-1.29345	0.308898	-4.1873	2.82e-05	0.00150597	Up_In_A2	GALNTL6	chr4	171812254	173041559	+	protein_coding
ENSG00000239207.2	1.1826	1.01557	0.368304	2.75741	0.0058261	0.056756	Up_In_B2	GAPDHP39	chr3	138777832	138778810	+	processed_pseudogene
ENSG00000219881.1	2.11983	1.42164	0.340963	4.16948	3.05e-05	0.00159105	Up_In_B2	GAPDHP42	chr6	69745871	69746851	+	processed_pseudogene
ENSG00000224678.3	1.58508	1.03809	0.327046	3.17415	0.00150276	0.0231736	Up_In_B2	GAPDHP46	chr1	92114803	92115796	-	processed_pseudogene
ENSG00000234285.1	0.740317	1.44174	0.570459	2.52734	0.011493	0.089061	Up_In_B2	GAPDHP49	chr2	222503883	222504843	-	processed_pseudogene
ENSG00000236973.2	0.989761	1.90665	0.485917	3.92383	8.72e-05	0.00329309	Up_In_B2	GAPDHP51	chr1	51707138	51708137	-	processed_pseudogene
ENSG00000231739.2	1.57267	1.20724	0.352498	3.4248	0.000615243	0.0128902	Up_In_B2	GAPDHP59	chr2	187415552	187415818	+	processed_pseudogene
ENSG00000136574.16	61.8849	1.11582	0.533667	2.09085	0.0365415	0.179841	Up_In_B2	GATA4	chr8	11676959	11760002	+	protein_coding
ENSG00000124827.6	1.11943	2.30828	0.591728	3.90091	9.58e-05	0.00352897	Up_In_B2	GCM2	chr6	10873223	10881941	-	protein_coding
ENSG00000236474.1	1.18802	1.42956	0.4083	3.50124	0.000463098	0.0107699	Up_In_B2	GCNT1P1	chr20	18420160	18421454	-	processed_pseudogene
ENSG00000231047.1	0.769015	1.67532	0.471012	3.55686	0.000375319	0.00918622	Up_In_B2	GCNT1P3	chr3	190624595	190625169	+	processed_pseudogene
ENSG00000176857.5	1.30575	2.1246	0.446594	4.75735	1.96e-06	0.000251462	Up_In_B2	GJA1P1	chr5	109051315	109052457	-	processed_pseudogene
ENSG00000248590.2	0.987352	1.39112	0.511372	2.72036	0.00652114	0.0612523	Up_In_B2	GLDCP1	chr4	56593004	56595681	+	transcribed_processed_pseudogene
ENSG00000145888.9	0.918614	1.07806	0.359838	2.99595	0.00273587	0.034558	Up_In_B2	GLRA1	chr5	151822513	151924842	-	protein_coding
ENSG00000243495.1	0.625045	1.29446	0.622086	2.08084	0.0374485	0.1823	Up_In_B2	GMFBP1	chr3	100665050	100665476	-	processed_pseudogene
ENSG00000205835.7	1.20637	2.56648	0.597585	4.29476	1.75e-05	0.00108047	Up_In_B2	GMNC	chr3	190852877	190892429	-	protein_coding
ENSG00000109163.6	4.13483	1.67852	0.274108	6.12359	9.15e-10	9.95e-07	Up_In_B2	GNRHR	chr4	67739328	67754360	-	protein_coding
ENSG00000251215.1	0.816914	1.86016	0.504303	3.68858	0.000225513	0.00644396	Up_In_B2	GOLGA5P1	chr5	39169210	39170335	-	processed_pseudogene
ENSG00000156920.9	0.873549	1.67198	0.635615	2.63049	0.00852617	0.0730282	Up_In_B2	GPR112	chrX	136300963	136416888	+	protein_coding
ENSG00000173250.2	0.747859	1.419	0.464165	3.0571	0.00223492	0.0302198	Up_In_B2	GPR151	chr5	146513103	146516190	-	protein_coding
ENSG00000188394.6	0.818875	1.55001	0.434962	3.56355	0.000365867	0.00909728	Up_In_B2	GPR21	chr9	123034527	123035696	+	protein_coding
ENSG00000172209.5	5.14136	1.893	0.298883	6.33359	2.4e-10	4.29e-07	Up_In_B2	GPR22	chr7	107470018	107475659	+	protein_coding
ENSG00000203737.3	1.223	1.27143	0.412961	3.07882	0.00207824	0.0287515	Up_In_B2	GPR52	chr1	174448111	174449198	+	protein_coding
ENSG00000232374.5	0.546689	1.51836	0.569811	2.66467	0.00770639	0.0683262	Up_In_B2	GPR79	chr3	158841093	158841960	-	processed_pseudogene
ENSG00000138271.5	2.78826	-1.69528	0.433042	-3.91482	9.05e-05	0.00337373	Up_In_A2	GPR87	chr3	151294086	151316952	-	protein_coding
ENSG00000155511.16	6.64666	1.20933	0.27766	4.35543	1.33e-05	0.000897659	Up_In_B2	GRIA1	chr5	153489615	153813869	+	protein_coding
ENSG00000261024.5	1.43815	2.06777	0.409327	5.05164	4.38e-07	9.03e-05	Up_In_B2	GS1-279B7.1	chr1	185321157	185335039	-	transcribed_processed_pseudogene
ENSG00000226878.1	1.16697	2.61821	0.533976	4.90324	9.43e-07	0.000157448	Up_In_B2	GSTM3P2	chr2	159056094	159056859	-	processed_pseudogene
ENSG00000258966.1	0.728411	2.90564	1.34016	2.16813	0.0301486	0.160285	Up_In_B2	GTF3AP2	chr14	71044375	71044640	-	transcribed_processed_pseudogene
ENSG00000254781.1	1.11463	2.28451	0.533704	4.28049	1.86e-05	0.00112886	Up_In_B2	GVINP2	chr11	6748131	6750324	+	processed_pseudogene
ENSG00000276591.1	0.577589	1.25489	0.5716	2.19541	0.0281345	0.153713	Up_In_B2	GXYLT1P5	chr9	42974855	42978320	+	pseudo
ENSG00000213440.2	2.61727	1.25263	0.306249	4.09024	4.31e-05	0.00201986	Up_In_B2	H2AFZP1	chr21	44046347	44047041	-	pseudo
ENSG00000255329.1	2.20932	1.69218	0.344756	4.90834	9.18e-07	0.000155577	Up_In_B2	H2AFZP4	chr11	70278921	70279297	-	pseudo
ENSG00000233733.1	0.964331	2.07478	0.459375	4.51652	6.29e-06	0.000548144	Up_In_B2	H2AFZP6	chr22	31521199	31521592	-	pseudo
ENSG00000101323.4	0.744453	1.74187	0.752135	2.3159	0.0205635	0.126545	Up_In_B2	HAO1	chr20	7882981	7940474	-	protein_coding
ENSG00000213931.4	4.1286	-1.55657	0.521185	-2.98661	0.00282094	0.0352566	Up_In_A2	HBE1	chr11	5268345	5505617	-	protein_coding
ENSG00000164588.4	55.5659	1.0284	0.286232	3.59288	0.000327042	0.00844009	Up_In_B2	HCN1	chr5	45259247	45696151	-	protein_coding
ENSG00000258978.1	0.774069	1.9057	0.531727	3.58398	0.000338394	0.00866705	Up_In_B2	HIF1AP1	chr14	75116426	75116600	-	processed_pseudogene
ENSG00000219608.3	1.81553	1.48756	0.358221	4.15262	3.29e-05	0.00165865	Up_In_B2	HIGD1AP16	chr20	35878476	35878733	+	processed_pseudogene
ENSG00000253229.1	0.817384	1.43977	0.460587	3.12594	0.00177239	0.0257888	Up_In_B2	HIGD1AP6	chr8	75302296	75302574	+	processed_pseudogene
ENSG00000237303.2	0.488493	1.2538	0.562598	2.2286	0.0258407	0.145415	Up_In_B2	HIGD1AP8	chr12	11481383	11481656	+	processed_pseudogene
ENSG00000214511.3	0.892488	2.00637	0.528807	3.79415	0.000148147	0.00478693	Up_In_B2	HIGD1C	chr12	50953922	50970506	+	protein_coding
ENSG00000278463.1	4.01276	1.13697	0.339047	3.35343	0.000798165	0.0152539	Up_In_B2	HIST1H2AB	chr6	26033176	26033568	-	protein_coding
ENSG00000276410.2	1.52482	2.47794	0.562438	4.40571	1.05e-05	0.000766945	Up_In_B2	HIST1H2BB	chr6	26043227	26123904	-	protein_coding
ENSG00000278588.1	3.8007	1.76494	0.331247	5.32817	9.92e-08	3.22e-05	Up_In_B2	HIST1H2BI	chr6	26272976	26273356	+	NA
ENSG00000274267.1	7.4028	1.14076	0.244332	4.66887	3.03e-06	0.000334582	Up_In_B2	HIST1H3B	chr6	26031650	26032060	-	protein_coding
ENSG00000277775.1	6.43575	1.22598	0.272371	4.50114	6.76e-06	0.000568463	Up_In_B2	HIST1H3F	chr6	26250195	26250605	-	protein_coding
ENSG00000275379.1	3.51231	1.17814	0.31946	3.68791	0.000226102	0.00645302	Up_In_B2	HIST1H3I	chr6	27871905	27872315	-	protein_coding
ENSG00000274618.1	0.801088	1.72876	0.569731	3.03434	0.00241064	0.0316574	Up_In_B2	HIST1H4F	chr6	26240426	26240737	+	protein_coding
ENSG00000275126.1	1.47673	1.30736	0.485198	2.69448	0.00704976	0.064481	Up_In_B2	HIST1H4L	chr6	27873199	27873510	-	protein_coding
ENSG00000180189.10	5.39997	1.15793	0.223822	5.17345	2.3e-07	5.86e-05	Up_In_B2	HMGB1P14	chr14	58284773	58285363	+	processed_pseudogene
ENSG00000248909.1	1.60979	1.02986	0.295382	3.48653	0.000489333	0.0110951	Up_In_B2	HMGB1P21	chr5	78644265	78644845	-	processed_pseudogene
ENSG00000253770.1	1.08055	2.97794	1.00672	2.95805	0.00309592	0.0372343	Up_In_B2	HMGB1P23	chr8	29218905	29219472	+	processed_pseudogene
ENSG00000231148.1	1.08043	2.98193	0.795619	3.74794	0.000178294	0.00542824	Up_In_B2	HMGB1P7	chr10	31913143	31913754	+	processed_pseudogene
ENSG00000231845.3	2.13142	1.29411	0.345646	3.74404	0.000181088	0.00548515	Up_In_B2	HMGB3P14	chr3	134170487	134171085	+	processed_pseudogene
ENSG00000224551.1	0.636377	1.59408	0.667658	2.38757	0.0169601	0.112768	Up_In_B2	HMGB3P21	chr7	97135015	97135561	-	processed_pseudogene
ENSG00000260828.1	5.62152	1.39099	0.219916	6.32509	2.53e-10	4.29e-07	Up_In_B2	HMGB3P32	chr16	57603137	57603697	+	processed_pseudogene
ENSG00000229992.1	1.29013	1.79377	0.481526	3.72518	0.000195175	0.00576458	Up_In_B2	HMGB3P9	chr1	92647048	92647630	-	processed_pseudogene
ENSG00000244101.1	1.00986	3.33414	1.3659	2.44098	0.0146474	0.103329	Up_In_B2	HMGN1P10	chr3	136609050	136609602	+	processed_pseudogene
ENSG00000247911.3	1.03501	2.8242	0.750198	3.76461	0.000166811	0.00517159	Up_In_B2	HMGN1P12	chr5	71537652	71537846	-	processed_pseudogene
ENSG00000250197.1	0.968596	1.00581	0.347814	2.89181	0.00383034	0.0428709	Up_In_B2	HMGN1P15	chr5	115289036	115289330	-	processed_pseudogene
ENSG00000229046.1	1.53904	2.56699	0.550383	4.66402	3.1e-06	0.000335822	Up_In_B2	HMGN1P2	chr21	31706555	31706864	+	processed_pseudogene
ENSG00000241120.1	3.20053	1.215	0.282726	4.29746	1.73e-05	0.00107546	Up_In_B2	HMGN1P8	chr3	167694355	167694642	-	processed_pseudogene
ENSG00000232963.1	1.36436	2.38275	0.493759	4.82572	1.39e-06	0.000197421	Up_In_B2	HMGN2P20	chr2	24330402	24330674	+	processed_pseudogene
ENSG00000232916.1	2.40878	1.88961	0.324104	5.83026	5.53e-09	3.86e-06	Up_In_B2	HMGN2P27	chr5	116218026	116218295	-	processed_pseudogene
ENSG00000232875.1	1.59378	2.41899	0.429797	5.62822	1.82e-08	9.9e-06	Up_In_B2	HMGN2P35	chr10	96915633	96915902	-	processed_pseudogene
ENSG00000231726.2	1.10805	1.57799	0.386869	4.07889	4.53e-05	0.00207989	Up_In_B2	HMGN2P38	chr11	73580253	73580517	+	processed_pseudogene
ENSG00000214761.3	2.65917	1.26126	0.315695	3.99518	6.46e-05	0.00263893	Up_In_B2	HNRNPA1P15	chr9	125595669	125596628	+	processed_pseudogene
ENSG00000243188.1	1.63725	1.02992	0.344137	2.99275	0.00276478	0.0348032	Up_In_B2	HNRNPA1P17	chr3	108325520	108326814	-	unprocessed_pseudogene
ENSG00000235784.2	0.840261	2.7437	1.03057	2.66231	0.00776067	0.0686022	Up_In_B2	HNRNPA1P29	chr13	93394977	93395855	-	processed_pseudogene
ENSG00000226188.2	1.38252	2.33196	0.491331	4.74622	2.07e-06	0.000260081	Up_In_B2	HNRNPA1P3	chr20	45745737	45746287	-	processed_pseudogene
ENSG00000259411.1	2.18512	1.07212	0.279707	3.83301	0.000126583	0.00424942	Up_In_B2	HNRNPA1P45	chr15	35400691	35401768	+	processed_pseudogene
ENSG00000259228.1	2.38404	1.56174	0.315251	4.95396	7.27e-07	0.000129676	Up_In_B2	HNRNPA1P62	chr15	99284625	99285576	-	processed_pseudogene
ENSG00000230946.3	1.6443	1.34004	0.336345	3.98411	6.77e-05	0.00272738	Up_In_B2	HNRNPA1P68	chr1	100941017	100941995	-	processed_pseudogene
ENSG00000255141.1	1.54784	2.26378	0.433926	5.21698	1.82e-07	5.02e-05	Up_In_B2	HNRNPA1P76	chr11	3972881	3974237	-	processed_pseudogene
ENSG00000231956.1	3.9096	1.03889	0.248778	4.17597	2.97e-05	0.00156035	Up_In_B2	HNRNPA1P9	chr7	87521461	87522410	+	processed_pseudogene
ENSG00000225636.1	1.18077	2.16672	0.501845	4.31751	1.58e-05	0.00100069	Up_In_B2	HNRNPA3P15	chr2	197014990	197016015	+	processed_pseudogene
ENSG00000227688.2	1.42195	2.1147	0.414319	5.10405	3.32e-07	7.58e-05	Up_In_B2	HNRNPA3P2	chr20	36620403	36621423	+	unprocessed_pseudogene
ENSG00000253119.1	2.12467	1.3648	0.299763	4.55294	5.29e-06	0.000495326	Up_In_B2	HNRNPA3P7	chr5	154337471	154338452	-	processed_pseudogene
ENSG00000234890.1	0.566708	2.25427	0.961729	2.34397	0.0190796	0.120371	Up_In_B2	HNRNPDLP2	chr2	158419955	158425303	+	unprocessed_pseudogene
ENSG00000259335.1	2.14645	3.1998	0.532065	6.01392	1.81e-09	1.87e-06	Up_In_B2	HNRNPMP1	chr15	44447577	44449344	-	processed_pseudogene
ENSG00000223984.1	2.16618	1.32355	0.336782	3.92999	8.49e-05	0.00323911	Up_In_B2	HNRNPRP1	chr10	21624592	21626286	-	processed_pseudogene
ENSG00000143452.14	21.7297	1.39923	0.292055	4.79099	1.66e-06	0.000225742	Up_In_B2	HORMAD1	chr1	150698060	150720888	-	protein_coding
ENSG00000182601.6	5.67232	1.03367	0.370338	2.79116	0.00525194	0.052847	Up_In_B2	HS3ST4	chr16	25692026	26137688	+	protein_coding
ENSG00000227289.1	0.597859	1.17878	0.583914	2.01876	0.0435122	0.199185	Up_In_B2	HSFY3P	chrY	2881683	2883652	-	transcribed_unprocessed_pseudogene
ENSG00000251614.1	1.11499	2.58469	0.653568	3.95473	7.66e-05	0.00299374	Up_In_B2	HSPA8P19	chr3	132645831	132650383	+	processed_pseudogene
ENSG00000187762.5	2.73194	1.70344	0.349422	4.87502	1.09e-06	0.000170882	Up_In_B2	HSPE1P11	chr6	35023522	35023831	+	processed_pseudogene
ENSG00000225900.1	1.51998	3.44258	0.77125	4.46363	8.06e-06	0.000637056	Up_In_B2	HSPE1P13	chr2	39098149	39098445	-	processed_pseudogene
ENSG00000255163.1	1.40604	1.20059	0.369818	3.24645	0.00116855	0.0197537	Up_In_B2	HSPE1P18	chr11	118208932	118209211	-	processed_pseudogene
ENSG00000232015.2	1.04151	2.52439	0.518895	4.86493	1.14e-06	0.000175194	Up_In_B2	HSPE1P25	chr1	77853355	77853893	+	processed_pseudogene
ENSG00000220867.1	2.19549	1.42792	0.346336	4.12293	3.74e-05	0.00179963	Up_In_B2	HSPE1P26	chr6	157924402	157924676	+	processed_pseudogene
ENSG00000235112.1	2.20786	2.66036	0.534642	4.97596	6.49e-07	0.000120298	Up_In_B2	HSPE1P27	chr1	21161475	21162081	+	processed_pseudogene
ENSG00000126550.7	0.680231	2.02039	0.665214	3.0372	0.00238784	0.0314974	Up_In_B2	HTN1	chr4	70050402	70058845	+	protein_coding
ENSG00000275811.1	1.3853	2.14273	0.543626	3.94156	8.1e-05	0.00312699	Up_In_B2	HTR1DP1	chr12	1151810	1153059	-	processed_pseudogene
ENSG00000178084.1	2.77629	-1.31945	0.456295	-2.89166	0.00383212	0.0428709	Up_In_A2	HTR3C	chr3	184053047	184060671	+	protein_coding
ENSG00000125631.7	4.84918	1.09745	0.230303	4.76524	1.89e-06	0.000247171	Up_In_B2	HTR5BP	chr2	117859427	117934942	+	transcribed_unprocessed_pseudogene
ENSG00000148377.5	0.768148	1.15874	0.38712	2.99323	0.00276045	0.0347688	Up_In_B2	IDI2	chr10	1018907	1025859	-	protein_coding
ENSG00000204010.3	0.871016	1.31215	0.449173	2.92127	0.00348613	0.0401947	Up_In_B2	IFIT1B	chr10	89378056	89385205	+	protein_coding
ENSG00000147896.3	0.964485	2.90952	0.926474	3.14042	0.00168703	0.0249137	Up_In_B2	IFNK	chr9	27524314	27526498	+	protein_coding
ENSG00000146678.8	22.4627	-1.19412	0.328707	-3.63277	0.000280398	0.00751435	Up_In_A2	IGFBP1	chr7	45888357	45893668	+	protein_coding
ENSG00000204866.7	131.682	1.07259	0.277692	3.86251	0.000112228	0.00393744	Up_In_B2	IGFL2	chr19	46143106	46161299	+	protein_coding
ENSG00000278857.1	11.3097	1.19679	0.370444	3.2307	0.00123487	0.020361	Up_In_B2	IGKV1D-12	chr2	90159840	90160335	+	IG_V_gene
ENSG00000211654.2	12.4195	-1.13569	0.414851	-2.73759	0.00618907	0.0592357	Up_In_A2	IGLV5-37	chr22	22427540	22428035	+	IG_V_gene
ENSG00000227018.1	0.68871	1.21834	0.444601	2.74029	0.00613843	0.0589192	Up_In_B2	IL6STP1	chr17	15783288	15784307	+	processed_pseudogene
ENSG00000270269.1	2.56429	1.34255	0.325026	4.13058	3.62e-05	0.00176223	Up_In_B2	IMMP1LP1	chr11	63632233	63632720	+	processed_pseudogene
ENSG00000271098.1	0.546937	1.68702	0.72717	2.31998	0.0203419	0.12554	Up_In_B2	IMMP1LP3	chr7	2287915	2288428	+	processed_pseudogene
ENSG00000120210.6	2.26646	3.3173	0.506579	6.54844	5.81e-11	1.72e-07	Up_In_B2	INSL6	chr9	5131979	5185668	-	protein_coding
ENSG00000168348.3	0.940422	1.66337	0.39325	4.22981	2.34e-05	0.00131524	Up_In_B2	INSM2	chr14	35534042	35537054	+	protein_coding
ENSG00000266853.1	1.12192	1.92104	0.406438	4.72653	2.28e-06	0.00028076	Up_In_B2	ITM2BP1	chr17	27612588	27613251	-	processed_pseudogene
ENSG00000233603.1	1.00262	2.60667	0.648	4.02264	5.75e-05	0.00243341	Up_In_B2	JTBP1	chr22	40798039	40798285	+	processed_pseudogene
ENSG00000229696.1	1.43805	2.7711	0.619836	4.47069	7.8e-06	0.000633915	Up_In_B2	KARSP1	chr13	41925598	41927349	+	pseudo
ENSG00000232857.2	1.2885	3.2593	0.642838	5.07017	3.97e-07	8.45e-05	Up_In_B2	KATNBL1P2	chr1	94650544	94651378	-	processed_pseudogene
ENSG00000235422.1	0.640903	1.77861	0.684942	2.59672	0.00941175	0.0784041	Up_In_B2	KATNBL1P3	chr18	2593674	2594913	-	processed_pseudogene
ENSG00000140015.18	1.57826	2.22263	0.571116	3.89173	9.95e-05	0.00364046	Up_In_B2	KCNH5	chr14	62699454	63102037	-	protein_coding
ENSG00000115474.6	1.80561	1.00547	0.293263	3.42857	0.000606774	0.0127692	Up_In_B2	KCNJ13	chr2	232766464	232776568	-	protein_coding
ENSG00000162728.4	4.65721	1.08497	0.222416	4.8781	1.07e-06	0.000169504	Up_In_B2	KCNJ9	chr1	160081570	160090563	+	protein_coding
ENSG00000239435.2	0.506369	1.35654	0.461973	2.93641	0.00332036	0.0389076	Up_In_B2	KCNMB3P1	chr22	16575363	16582707	-	transcribed_unprocessed_pseudogene
ENSG00000156486.7	5.56321	1.23305	0.276374	4.46153	8.14e-06	0.000641199	Up_In_B2	KCNS2	chr8	98427022	98432848	+	protein_coding
ENSG00000214264.4	1.92677	1.29798	0.300486	4.3196	1.56e-05	0.000996564	Up_In_B2	KCTD9P4	chr11	112180773	112183191	+	processed_pseudogene
ENSG00000248216.1	0.709693	2.71298	0.990906	2.73787	0.00618376	0.0592095	Up_In_B2	KCTD9P5	chr5	37505688	37506857	-	processed_pseudogene
ENSG00000189367.13	2.42884	1.1218	0.348155	3.22213	0.00127239	0.0208358	Up_In_B2	KIAA0408	chr6	127440343	127459391	-	protein_coding
ENSG00000226520.1	0.823638	1.54479	0.446583	3.45914	0.00054191	0.0120342	Up_In_B2	KIRREL-IT1	chr1	158025550	158031166	+	NA
ENSG00000233186.2	0.983452	3.11858	1.14362	2.72694	0.00639238	0.0606072	Up_In_B2	KLF4P1	chr9	4803788	4804972	-	processed_pseudogene
ENSG00000233471.2	1.1635	1.68789	0.4081	4.13598	3.53e-05	0.00173715	Up_In_B2	KRT18P62	chr22	19257520	19258806	+	processed_pseudogene
ENSG00000229028.2	0.611463	1.47565	0.657469	2.24444	0.0248043	0.141745	Up_In_B2	KRT223P	chr17	40717235	40721932	-	transcribed_unprocessed_pseudogene
ENSG00000171446.6	0.611515	1.02873	0.411056	2.50265	0.0123269	0.0927232	Up_In_B2	KRT27	chr17	40776808	40782534	-	protein_coding
ENSG00000236430.1	1.04222	1.15774	0.341862	3.38658	0.000707704	0.014034	Up_In_B2	KRT8P29	chr1	203872574	203874187	-	processed_pseudogene
ENSG00000182816.7	2.81949	-1.60927	0.623035	-2.58295	0.00979582	0.0802236	Up_In_A2	KRTAP13-2	chr21	30348075	30425912	-	protein_coding
ENSG00000248979.2	1.16441	1.17033	0.404438	2.89371	0.00380718	0.0427129	Up_In_B2	LAMTOR3P2	chr5	119132651	119132882	-	processed_pseudogene
ENSG00000236646.1	2.11646	1.85581	0.431495	4.30088	1.7e-05	0.00106457	Up_In_B2	LAMTOR5P1	chr1	62038842	62039111	+	processed_pseudogene
ENSG00000220091.2	1.09311	3.21103	0.876431	3.66375	0.000248548	0.00691088	Up_In_B2	LAP3P1	chr6	82924829	82925122	-	processed_pseudogene
ENSG00000261315.2	1.28987	1.86073	0.430908	4.31817	1.57e-05	0.00100038	Up_In_B2	LARP4P	chr15	36617089	36619265	+	transcribed_processed_pseudogene
ENSG00000174697.4	13.1449	1.33145	0.362193	3.67607	0.000236856	0.00668752	Up_In_B2	LEP	chr7	128241284	128257628	+	protein_coding
ENSG00000138039.13	0.824299	1.55976	0.668598	2.33289	0.0196542	0.12274	Up_In_B2	LHCGR	chr2	48686775	48755730	-	protein_coding
ENSG00000156959.8	22.4112	2.6418	0.361769	7.30246	2.83e-13	1.68e-09	Up_In_B2	LHFPL4	chr3	9498361	9553802	-	protein_coding
ENSG00000143355.14	2.58973	1.10322	0.403265	2.73572	0.00622438	0.0594777	Up_In_B2	LHX9	chr1	197911902	197935478	+	protein_coding
ENSG00000186152.6	0.95152	1.01641	0.361189	2.81407	0.00489192	0.0503566	Up_In_B2	LILRP1	chr19	54696604	54700905	+	unprocessed_pseudogene
ENSG00000186152.6	0.95152	1.01641	0.361189	2.81407	0.00489192	0.0503566	Up_In_B2	LILRP1	chr19	54696604	54700905	+	transcribed_unprocessed_pseudogene
ENSG00000131914.9	1.23443	-1.28622	0.433021	-2.97035	0.00297463	0.0365162	Up_In_A2	LIN28A	chr1	26410778	26429722	+	protein_coding
ENSG00000260802.1	11.3284	1.05532	0.296023	3.56498	0.00036388	0.0090748	Up_In_B2	LINC00890	chrX	111511662	111522399	+	protein_coding
ENSG00000255414.1	1.46388	2.11418	0.43142	4.90053	9.56e-07	0.000158522	Up_In_B2	LINC01059	chr11	123454398	123460410	+	protein_coding
ENSG00000259417.2	28.3255	-1.45298	0.296104	-4.90697	9.25e-07	0.000155577	Up_In_A2	LINC01314	chr15	80195484	80252213	-	protein_coding
ENSG00000182333.13	1.18652	2.48133	0.699614	3.54671	0.000390079	0.00945961	Up_In_B2	LIPF	chr10	88664441	88678814	+	protein_coding
ENSG00000204022.8	2.13362	1.25942	0.298127	4.22446	2.4e-05	0.00133162	Up_In_B2	LIPJ	chr10	88586753	88606976	+	protein_coding
ENSG00000204021.3	1.0552	1.03764	0.432513	2.39908	0.0164361	0.110827	Up_In_B2	LIPK	chr10	88724544	88752786	+	protein_coding
ENSG00000235514.1	1.2028	2.72231	0.561368	4.84942	1.24e-06	0.000186681	Up_In_B2	LLPHP2	chr21	25762938	25763333	-	processed_pseudogene
ENSG00000152936.9	0.947182	1.41159	0.506369	2.78767	0.00530882	0.0531272	Up_In_B2	LMNTD1	chr12	25409307	25648579	-	protein_coding
ENSG00000267361.1	1.06633	1.86648	0.5043	3.70113	0.00021464	0.00620051	Up_In_B2	LOC100421166	chr17	69094289	69095499	-	pseudo
ENSG00000168702.15	6.3314	1.29804	0.286557	4.52977	5.9e-06	0.000526475	Up_In_B2	LRP1B	chr2	140231423	142131701	-	protein_coding
ENSG00000128594.6	65.0198	1.04781	0.190785	5.4921	3.97e-08	1.71e-05	Up_In_B2	LRRC4	chr7	128027071	128032107	-	protein_coding
ENSG00000198739.9	1.53242	2.40537	0.558301	4.30836	1.64e-05	0.00103741	Up_In_B2	LRRTM3	chr10	66926006	67099830	+	protein_coding
ENSG00000257847.1	0.662851	1.71012	0.58633	2.91665	0.00353816	0.0405188	Up_In_B2	LSM3P2	chr12	94590821	94591093	+	processed_pseudogene
ENSG00000143194.11	11.5561	1.26012	0.234173	5.38116	7.4e-08	2.58e-05	Up_In_B2	MAEL	chr1	166975582	167022214	+	protein_coding
ENSG00000124260.10	2.07932	1.34477	0.453363	2.96621	0.00301497	0.0367451	Up_In_B2	MAGEA10	chrX	152133310	152138578	-	protein_coding
ENSG00000099399.5	4.29853	1.53733	0.75864	2.02643	0.0427208	0.197353	Up_In_B2	MAGEB2	chrX	30215560	30220089	+	protein_coding
ENSG00000235751.3	0.770569	2.33703	0.773358	3.02193	0.0025117	0.0324618	Up_In_B2	MAGI2-IT1	chr7	78901275	79000298	-	NA
ENSG00000204740.8	139.417	1.32937	0.335223	3.96561	7.32e-05	0.00289862	Up_In_B2	MALRD1	chr10	19048771	19790401	+	protein_coding
ENSG00000267647.1	0.581897	1.7349	0.68083	2.54822	0.0108275	0.0856992	Up_In_B2	MAP1LC3P	chr18	54954403	54954732	+	processed_pseudogene
ENSG00000237263.1	3.03286	1.17269	0.257746	4.54978	5.37e-06	0.000497514	Up_In_B2	MAPK6PS3	chr13	42068932	42071093	-	NA
ENSG00000244065.1	0.645806	1.64961	0.599432	2.75196	0.00592394	0.0574399	Up_In_B2	MARK2P17	chr3	128843564	128844404	-	processed_pseudogene
ENSG00000271642.1	0.553997	1.818	0.858917	2.11662	0.0342923	0.173504	Up_In_B2	MARK3P1	chr12	46682071	46682713	-	processed_pseudogene
ENSG00000236595.1	1.5593	-1.2707	0.349723	-3.63344	0.000279665	0.00751168	Up_In_A2	MED15P5	chr2	130251568	130252559	+	processed_pseudogene
ENSG00000269964.2	1.3401	1.09333	0.359875	3.03807	0.00238098	0.0314338	Up_In_B2	MEI4	chr6	77690658	77926974	+	protein_coding
ENSG00000229623.1	1.17409	3.24988	1.00942	3.21956	0.00128387	0.0209852	Up_In_B2	METTL21AP1	chr21	39235386	39236020	-	processed_pseudogene
ENSG00000139780.7	0.812539	1.75506	0.541123	3.24336	0.00118128	0.0198323	Up_In_B2	METTL21C	chr13	102685744	102694504	-	protein_coding
ENSG00000225358.1	0.834909	1.4304	0.479981	2.98011	0.00288144	0.0357049	Up_In_B2	MIPEPP1	chr7	112735166	112738693	-	processed_pseudogene
ENSG00000265421.1	0.545926	2.50757	1.26564	1.98126	0.0475625	0.209508	Up_In_B2	MIR4459	chr5	54075518	54075583	-	NA
ENSG00000225133.1	0.70523	1.04878	0.480199	2.18407	0.0289575	0.156407	Up_In_B2	MORF4L1P4	chr13	41199832	41200807	-	processed_pseudogene
ENSG00000231857.1	1.25383	3.1865	0.783519	4.0669	4.76e-05	0.00215667	Up_In_B2	MORF4L1P5	chrX	65327988	65331233	-	processed_pseudogene
ENSG00000170262.11	3.01305	1.40983	0.304942	4.62326	3.78e-06	0.000387853	Up_In_B2	MRAP	chr21	32291813	32314784	+	protein_coding
ENSG00000183695.2	0.554285	1.76362	0.684724	2.57566	0.0100048	0.0812615	Up_In_B2	MRGPRX2	chr11	19054455	19060681	-	protein_coding
ENSG00000171495.15	0.908215	1.12198	0.464733	2.41423	0.0157683	0.108117	Up_In_B2	MROH2B	chr5	40998017	41071342	-	protein_coding
ENSG00000117501.13	1.82209	2.47714	0.567633	4.36397	1.28e-05	0.000872038	Up_In_B2	MROH9	chr1	170935471	171064765	+	protein_coding
ENSG00000275940.1	1.02455	1.06027	0.389389	2.72291	0.00647095	0.0610225	Up_In_B2	MRP63P3	chr3	47028855	47029030	+	NA
ENSG00000226253.1	1.67203	1.10484	0.291613	3.78871	0.000151433	0.00483653	Up_In_B2	MRPL35P3	chr10	74527584	74527947	+	processed_pseudogene
ENSG00000238285.1	0.618968	1.59106	0.511386	3.11128	0.0018628	0.0266801	Up_In_B2	MRPL50P2	chr2	203315390	203315871	-	processed_pseudogene
ENSG00000235299.2	1.38763	2.35063	0.434644	5.40818	6.37e-08	2.29e-05	Up_In_B2	MRPL53P1	chr1	112625906	112626224	-	processed_pseudogene
ENSG00000262759.1	1.17166	2.68477	0.569022	4.71822	2.38e-06	0.000289369	Up_In_B2	MRPS21P9	chr17	50450179	50450725	-	processed_pseudogene
ENSG00000249649.1	0.691997	2.2137	0.860047	2.57393	0.0100552	0.0816148	Up_In_B2	MRPS33P2	chr4	38006784	38007105	-	processed_pseudogene
ENSG00000237130.1	0.739541	2.93454	1.40668	2.08615	0.036965	0.181071	Up_In_B2	MRPS6P2	chr1	50846468	50846837	+	processed_pseudogene
ENSG00000149516.12	0.94678	1.11304	0.361072	3.0826	0.00205201	0.0285775	Up_In_B2	MS4A3	chr11	60056587	60071128	+	protein_coding
ENSG00000263483.1	0.528706	1.09876	0.499603	2.19926	0.0278591	0.152524	Up_In_B2	MTATP6P3	chr17	22529934	22530609	+	unprocessed_pseudogene
ENSG00000232102.1	0.955979	3.18605	0.975949	3.26457	0.00109632	0.0189377	Up_In_B2	MTCO3P2	chr13	23765934	23766104	-	processed_pseudogene
ENSG00000232373.2	0.851211	2.30808	0.59685	3.8671	0.000110138	0.00389871	Up_In_B2	MTCYBP3	chr13	95694569	95695705	+	processed_pseudogene
ENSG00000228166.1	0.88852	2.28434	0.74256	3.07631	0.00209583	0.0288544	Up_In_B2	MTND1P11	chr9	5094139	5095014	+	unprocessed_pseudogene
ENSG00000235940.1	1.58119	3.94825	1.29659	3.04509	0.0023261	0.0310567	Up_In_B2	MTND1P21	chr10	20804293	20804577	+	processed_pseudogene
ENSG00000232282.1	1.10871	3.28965	1.00052	3.28795	0.00100919	0.0177213	Up_In_B2	MTND1P32	chrX	102785667	102786604	+	processed_pseudogene
ENSG00000225514.1	0.63837	2.70848	1.13613	2.38396	0.0171273	0.113193	Up_In_B2	MTND1P34	chr1	47164510	47165920	-	transcribed_processed_pseudogene
ENSG00000253245.2	0.571986	2.35074	0.995333	2.36176	0.0181884	0.117189	Up_In_B2	MTND1P36	chr11	103407441	103408376	-	processed_pseudogene
ENSG00000228995.1	2.0248	3.04273	0.545904	5.57374	2.49e-08	1.21e-05	Up_In_B2	MTND1P9	chr20	57357426	57358369	-	processed_pseudogene
ENSG00000237124.1	1.97056	3.73981	0.916262	4.08159	4.47e-05	0.00206383	Up_In_B2	MTND2P11	chr9	109300186	109301172	+	unprocessed_pseudogene
ENSG00000229954.1	1.84273	4.11706	1.19414	3.44771	0.000565358	0.0122515	Up_In_B2	MTND2P2	chrX	102786813	102788387	+	processed_pseudogene
ENSG00000254090.1	0.58834	1.60479	0.577004	2.78125	0.005415	0.0538281	Up_In_B2	MTND2P32	chr8	33015261	33017043	+	processed_pseudogene
ENSG00000224354.2	0.646967	1.25211	0.561657	2.22931	0.0257931	0.145312	Up_In_B2	MTND2P5	chr7	141802482	141803487	-	processed_pseudogene
ENSG00000251353.1	0.556439	1.93373	0.675939	2.8608	0.00422578	0.0459316	Up_In_B2	MTND3P5	chr4	25720099	25720431	-	unprocessed_pseudogene
ENSG00000234099.1	0.483404	1.49855	0.714041	2.09868	0.0358448	0.178337	Up_In_B2	MTND4P11	chr1	93922574	93923945	-	unprocessed_pseudogene
ENSG00000236254.1	2.16299	3.05713	0.578485	5.28472	1.26e-07	3.78e-05	Up_In_B2	MTND4P14	chr9	5107937	5109290	+	unprocessed_pseudogene
ENSG00000227321.2	3.03107	1.50346	0.336569	4.46701	7.93e-06	0.000633915	Up_In_B2	MTND4P15	chr9	92110865	92111897	+	unprocessed_pseudogene
ENSG00000241787.1	0.531736	2.42079	1.12322	2.15522	0.0311442	0.163201	Up_In_B2	MTND4P16	chr3	106894352	106895718	-	unprocessed_pseudogene
ENSG00000226056.1	1.44267	3.62934	0.973293	3.72893	0.000192293	0.00570076	Up_In_B2	MTND4P32	chrX	102799942	102801399	+	processed_pseudogene
ENSG00000251544.1	1.24253	1.31965	0.432115	3.05392	0.00225871	0.0304721	Up_In_B2	MTND5P12	chr5	94567461	94568909	+	processed_pseudogene
ENSG00000231888.1	0.778771	2.11489	0.552804	3.82575	0.000130376	0.00434288	Up_In_B2	MTND5P15	chr3	177010719	177011067	-	processed_pseudogene
ENSG00000229622.1	1.20936	2.47899	0.551326	4.49641	6.91e-06	0.000577154	Up_In_B2	MTND5P2	chr13	95692538	95693972	+	processed_pseudogene
ENSG00000238256.1	0.728052	2.55481	0.765417	3.3378	0.000844455	0.0159078	Up_In_B2	MTND5P20	chr1	113576757	113576899	-	processed_pseudogene
ENSG00000234886.1	1.5505	3.83395	1.30464	2.9387	0.00329595	0.0387173	Up_In_B2	MTND5P26	chrX	102803041	102806138	+	processed_pseudogene
ENSG00000227730.2	1.12174	2.41308	0.66294	3.63997	0.000272674	0.00739088	Up_In_B2	MTND6P5	chr9	5091093	5091604	+	unprocessed_pseudogene
ENSG00000249860.3	0.690723	2.00618	0.635009	3.15929	0.00158151	0.0239218	Up_In_B2	MTRNR2L5	chr10	55599303	55600041	+	protein_coding
ENSG00000210176.1	2.93788	3.11369	0.586211	5.31155	1.09e-07	3.44e-05	Up_In_B2	MT-TH	chrM	12138	12206	+	Mt_tRNA
ENSG00000210184.1	1.89426	1.14453	0.34483	3.31912	0.000903029	0.0165511	Up_In_B2	MT-TS2	chrM	12207	12265	+	Mt_tRNA
ENSG00000210077.1	7.00999	1.24665	0.364609	3.41915	0.000628165	0.0130229	Up_In_B2	MT-TV	chrM	1602	1670	+	Mt_tRNA
ENSG00000181143.14	39.8844	-1.30635	0.322473	-4.05105	5.1e-05	0.00223939	Up_In_A2	MUC16	chr19	8848844	8981342	-	protein_coding
ENSG00000169876.12	3165.25	1.03169	0.33096	3.11726	0.00182541	0.0263021	Up_In_B2	MUC17	chr7	101020072	101058745	+	protein_coding
ENSG00000215182.8	1030.3	-1.70104	0.349429	-4.86806	1.13e-06	0.000173562	Up_In_A2	MUC5AC	chr11	1157953	1201138	+	protein_coding
ENSG00000184956.14	84.0285	-1.35537	0.344834	-3.9305	8.48e-05	0.0032375	Up_In_A2	MUC6	chr11	1012821	1036706	-	protein_coding
ENSG00000184956.14	84.0285	-1.35537	0.344834	-3.9305	8.48e-05	0.0032375	Up_In_A2	MUC6	chr11	1012821	1036706	-	polymorphic_pseudogene
ENSG00000172551.9	17.2832	1.1207	0.36399	3.07893	0.00207742	0.0287515	Up_In_B2	MUCL1	chr12	54830519	54858393	+	protein_coding
ENSG00000237906.1	0.521602	2.00039	0.89314	2.23972	0.0251088	0.143013	Up_In_B2	MUPP	chr9	112959134	112962261	-	transcribed_unprocessed_pseudogene
ENSG00000221986.5	22.8799	-1.00783	0.377355	-2.67076	0.00756791	0.0677569	Up_In_A2	MYBPHL	chr1	109292365	109307041	-	protein_coding
ENSG00000109061.9	1.58522	1.02351	0.352975	2.89966	0.00373565	0.0421757	Up_In_B2	MYH1	chr17	10492307	10518543	-	protein_coding
ENSG00000125414.17	1.64298	1.01352	0.419864	2.41393	0.0157815	0.108119	Up_In_B2	MYH2	chr17	10521148	10549957	-	protein_coding
ENSG00000133020.4	1.26312	1.07818	0.362615	2.97335	0.00294568	0.0362735	Up_In_B2	MYH8	chr17	10390322	10421950	-	protein_coding
ENSG00000240677.1	0.772196	1.28272	0.568833	2.255	0.0241333	0.139534	Up_In_B2	MYL6P4	chr7	141811805	141812257	+	processed_pseudogene
ENSG00000133454.14	21.8537	1.54002	0.271527	5.6717	1.41e-08	8.18e-06	Up_In_B2	MYO18B	chr22	25742144	26031041	+	protein_coding
ENSG00000120729.8	13.5668	1.35273	0.298808	4.5271	5.98e-06	0.000529198	Up_In_B2	MYOT	chr5	137867791	137887851	+	protein_coding
ENSG00000172399.5	2.6094	1.26597	0.266	4.75929	1.94e-06	0.000251353	Up_In_B2	MYOZ2	chr4	119135784	119187789	+	protein_coding
ENSG00000271264.1	1.11123	3.02649	0.755554	4.00566	6.18e-05	0.00256221	Up_In_B2	MZT1P1	chr1	9780822	9781240	+	processed_pseudogene
ENSG00000156269.4	1.50569	1.9989	0.529345	3.77618	0.000159254	0.00501596	Up_In_B2	NAA11	chr4	79225694	79326050	-	protein_coding
ENSG00000228670.4	0.671643	2.17714	0.847081	2.57017	0.0101648	0.0822512	Up_In_B2	NANOGP2	chr2	222452400	222453126	-	processed_pseudogene
ENSG00000231697.3	0.805444	2.09032	0.599428	3.48719	0.000488117	0.0110888	Up_In_B2	NANOGP5	chr9	100175178	100176054	+	transcribed_processed_pseudogene
ENSG00000253789.1	0.684119	2.55554	1.19947	2.13056	0.0331258	0.170206	Up_In_B2	NARSP2	chr8	62110524	62119898	+	NA
ENSG00000258590.4	3.09596	1.43834	0.301751	4.76666	1.87e-06	0.000247171	Up_In_B2	NBEAP1	chr15	20657638	20688408	-	transcribed_unprocessed_pseudogene
ENSG00000230356.1	22.5572	1.21737	0.297097	4.09755	4.18e-05	0.00197663	Up_In_B2	NCAPD2P1	chr7	34750253	34752053	-	processed_pseudogene
ENSG00000267590.1	1.5211	1.22284	0.343461	3.56034	0.000370376	0.00912172	Up_In_B2	NDUFA3P1	chr19	44297104	44297355	+	processed_pseudogene
ENSG00000254856.1	1.4555	3.2295	0.806559	4.00405	6.23e-05	0.00257281	Up_In_B2	NDUFA3P2	chr11	68488609	68488840	-	processed_pseudogene
ENSG00000259918.1	3.91193	1.01417	0.243679	4.1619	3.16e-05	0.00161083	Up_In_B2	NDUFA5P11	chr16	47598654	47598996	-	processed_pseudogene
ENSG00000253454.1	0.87903	3.15362	1.16246	2.71289	0.00666996	0.0622556	Up_In_B2	NDUFA5P2	chr8	104566086	104566429	+	processed_pseudogene
ENSG00000231378.1	0.637121	2.46179	0.954429	2.57934	0.00989906	0.0807345	Up_In_B2	NDUFAF4P4	chr1	174849667	174850168	-	processed_pseudogene
ENSG00000242510.1	1.39853	1.99893	0.723225	2.76392	0.00571123	0.0559725	Up_In_B2	NDUFB4P1	chr3	67513940	67514320	+	processed_pseudogene
ENSG00000251306.1	1.18463	3.2883	1.06178	3.09698	0.00195505	0.0276658	Up_In_B2	NDUFB4P2	chr5	59528861	59529251	+	processed_pseudogene
ENSG00000233647.2	0.740675	1.29703	0.424857	3.05286	0.0022667	0.0305624	Up_In_B2	NENFP1	chr1	46665910	46666375	-	processed_pseudogene
ENSG00000162992.3	10.3045	1.12617	0.441976	2.54804	0.010833	0.0856992	Up_In_B2	NEUROD1	chr2	181673088	181680876	-	protein_coding
ENSG00000218428.1	1.17643	2.59633	0.578362	4.48911	7.15e-06	0.000593103	Up_In_B2	NIP7P3	chr6	116137058	116137572	-	processed_pseudogene
ENSG00000229544.8	0.698973	-1.23284	0.597679	-2.06272	0.0391393	0.187529	Up_In_A2	NKX1-2	chr10	124445239	124450184	-	protein_coding
ENSG00000136352.16	11.5422	1.6476	0.521541	3.1591	0.00158255	0.0239218	Up_In_B2	NKX2-1	chr14	36516392	36521149	-	protein_coding
ENSG00000148826.8	1.05712	1.37607	0.37274	3.69178	0.000222692	0.00638644	Up_In_B2	NKX6-2	chr10	132783179	132786052	-	protein_coding
ENSG00000248327.1	0.693546	1.27188	0.554209	2.29494	0.0217366	0.13062	Up_In_B2	NOL8P1	chr4	165547532	165551060	-	processed_pseudogene
ENSG00000185269.10	2983.24	1.03202	0.309427	3.33527	0.000852164	0.0159895	Up_In_B2	NOTUM	chr17	81952507	81961840	-	protein_coding
ENSG00000226827.1	0.891725	2.43533	0.584712	4.165	3.11e-05	0.0016006	Up_In_B2	NPM1P11	chr7	11257681	11258535	-	processed_pseudogene
ENSG00000239351.1	2.61301	1.31413	0.282359	4.65412	3.25e-06	0.000346041	Up_In_B2	NPM1P29	chr3	149938997	149939799	-	processed_pseudogene
ENSG00000228219.1	2.16391	2.32634	0.452722	5.13856	2.77e-07	6.77e-05	Up_In_B2	NPM1P30	chr10	21110682	21113388	+	processed_pseudogene
ENSG00000259440.2	0.91423	1.50051	0.477641	3.14151	0.00168079	0.0248758	Up_In_B2	NPM1P43	chr15	73161779	73162928	-	processed_pseudogene
ENSG00000120937.8	0.546538	1.39345	0.641476	2.17226	0.0298364	0.159264	Up_In_B2	NPPB	chr1	11857464	11858931	-	protein_coding
ENSG00000256355.1	0.583732	1.15289	0.395335	2.91623	0.00354286	0.0405531	Up_In_B2	NTAN1P3	chr12	67424272	67424986	-	processed_pseudogene
ENSG00000251073.1	0.512594	1.39003	0.611338	2.27375	0.0229812	0.135584	Up_In_B2	NUDT19P5	chr4	158182825	158183393	+	processed_pseudogene
ENSG00000228248.1	0.595712	2.14097	0.934067	2.29209	0.0219002	0.131236	Up_In_B2	NUTF2P3	chr9	77580245	77580628	+	processed_pseudogene
ENSG00000147206.15	46.62	-1.0294	0.315961	-3.25798	0.00112208	0.0192147	Up_In_A2	NXF3	chrX	103075810	103093125	-	protein_coding
ENSG00000177947.12	0.855671	2.34425	0.59202	3.95974	7.5e-05	0.00295595	Up_In_B2	ODF3	chr11	196738	200261	+	protein_coding
ENSG00000228212.1	1.63143	1.00196	0.314324	3.18768	0.00143419	0.0226312	Up_In_B2	OFD1P17	chr5	37209364	37212381	+	processed_pseudogene
ENSG00000124818.13	0.802395	1.50155	0.453972	3.30758	0.000941047	0.0169596	Up_In_B2	OPN5	chr6	47781982	47832780	+	protein_coding
ENSG00000082556.9	3.64219	1.34642	0.385775	3.49017	0.000482716	0.0110335	Up_In_B2	OPRK1	chr8	53225716	53251697	-	protein_coding
ENSG00000170790.4	1.00599	2.38055	0.55872	4.26071	2.04e-05	0.00120524	Up_In_B2	OR10A2	chr11	6869693	6870745	+	protein_coding
ENSG00000170782.3	0.787526	2.12201	0.611703	3.46901	0.000522376	0.0116989	Up_In_B2	OR10A4	chr11	6876625	6877619	+	protein_coding
ENSG00000166363.5	0.665	2.4604	1.01369	2.42717	0.015217	0.105866	Up_In_B2	OR10A5	chr11	6845652	6846705	+	protein_coding
ENSG00000172640.3	2.0144	1.01241	0.302301	3.34901	0.000811007	0.0154247	Up_In_B2	OR10AD1	chr12	48202083	48203387	-	protein_coding
ENSG00000136834.3	1.38271	1.01118	0.409138	2.47148	0.0134554	0.0979202	Up_In_B2	OR1J1	chr9	122476958	122477926	-	protein_coding
ENSG00000171496.3	1.54806	1.54966	0.331315	4.6773	2.91e-06	0.000333047	Up_In_B2	OR1L8	chr9	122567548	122568477	-	protein_coding
ENSG00000165202.3	1.24538	1.11865	0.475511	2.35253	0.0186461	0.118747	Up_In_B2	OR1Q1	chr9	122614738	122615682	+	protein_coding
ENSG00000183122.4	0.626705	1.18334	0.546539	2.16516	0.0303754	0.161073	Up_In_B2	OR2A3P	chr7	144157226	144158178	+	transcribed_unprocessed_pseudogene
ENSG00000180658.3	0.772203	1.84834	0.458625	4.03017	5.57e-05	0.00239041	Up_In_B2	OR2A4	chr6	131700469	131701401	-	protein_coding
ENSG00000244623.1	0.723394	1.49462	0.482134	3.1	0.0019352	0.0274669	Up_In_B2	OR2AE1	chr7	99875987	99877057	-	protein_coding
ENSG00000166368.2	1.18207	2.46409	0.584737	4.21401	2.51e-05	0.00137098	Up_In_B2	OR2D2	chr11	6891490	6892599	-	protein_coding
ENSG00000178358.4	0.916707	3.11621	1.0926	2.85212	0.00434288	0.0467359	Up_In_B2	OR2D3	chr11	6920974	6922043	+	protein_coding
ENSG00000248553.1	0.528357	2.31765	1.16804	1.98423	0.0472307	0.208757	Up_In_B2	OR52H2P	chr11	5551662	5552563	-	unitary_pseudogene
ENSG00000232268.5	0.501785	1.22373	0.479166	2.55387	0.0106534	0.0849868	Up_In_B2	OR52I1	chr11	4593750	4595013	+	protein_coding
ENSG00000257763.1	3.68795	1.06742	0.236977	4.50432	6.66e-06	0.000566029	Up_In_B2	OR5BK1P	chr12	48355792	48356614	-	unprocessed_pseudogene
ENSG00000258024.1	0.720388	1.48129	0.483915	3.06105	0.00220561	0.0299087	Up_In_B2	OR5BT1P	chr12	48385417	48386265	-	unprocessed_pseudogene
ENSG00000196099.4	0.70143	2.25953	0.722428	3.12768	0.00176189	0.0257149	Up_In_B2	OR6M1	chr11	123805335	123806387	-	protein_coding
ENSG00000254917.1	0.688621	-1.56059	0.647974	-2.40842	0.0160219	0.10913	Up_In_A2	OR7E15P	chr8	12696307	12697273	-	unprocessed_pseudogene
ENSG00000255203.1	1.37868	2.76642	0.610985	4.5278	5.96e-06	0.000529198	Up_In_B2	OR7E2P	chr11	86857059	86857947	-	unprocessed_pseudogene
ENSG00000272724.1	0.842845	1.28037	0.372264	3.43942	0.000582972	0.0124728	Up_In_B2	OR7E47P	chr12	52084744	52092285	+	transcribed_unprocessed_pseudogene
ENSG00000237621.3	0.615974	1.62078	0.515583	3.14358	0.00166895	0.0247785	Up_In_B2	OR9A1P	chr7	141887148	141888092	+	polymorphic_pseudogene
ENSG00000240031.1	1.21682	1.52035	0.404056	3.76272	0.000168074	0.00519714	Up_In_B2	OR9A3P	chr7	141862860	141863737	+	transcribed_unprocessed_pseudogene
ENSG00000258083.1	0.652955	2.06764	0.817554	2.52905	0.0114372	0.0888103	Up_In_B2	OR9A4	chr7	141918817	141919909	+	protein_coding
ENSG00000188729.5	0.803098	2.05729	0.645461	3.18731	0.00143601	0.0226448	Up_In_B2	OSTN	chr3	191199241	191265615	+	protein_coding
ENSG00000118976.5	3.76002	1.19402	0.262729	4.54467	5.5e-06	0.000505785	Up_In_B2	OTUD4P1	chr12	3839459	3842525	+	processed_pseudogene
ENSG00000187950.7	2.92963	1.5473	0.33543	4.61288	3.97e-06	0.000400786	Up_In_B2	OVCH1	chr12	29412474	29497686	-	protein_coding
ENSG00000101951.15	0.801391	1.65924	0.557469	2.97638	0.00291676	0.0360108	Up_In_B2	PAGE4	chrX	49829260	49833973	+	protein_coding
ENSG00000101349.15	2.19005	1.0614	0.53486	1.98444	0.0472066	0.208757	Up_In_B2	PAK7	chr20	9537389	9839041	-	NA
ENSG00000218823.1	0.502833	1.05926	0.494777	2.14088	0.032284	0.167715	Up_In_B2	PAPOLB	chr7	4857733	4861994	-	protein_coding
ENSG00000237353.5	0.664904	2.15797	0.728701	2.96139	0.0030625	0.0370389	Up_In_B2	PATE4	chr11	125833316	125840069	+	protein_coding
ENSG00000009709.10	9.86574	-1.35174	0.58108	-2.32625	0.0200051	0.124335	Up_In_A2	PAX7	chr1	18631006	18748866	+	protein_coding
ENSG00000254440.3	2.21052	1.75127	0.443642	3.94749	7.9e-05	0.0030656	Up_In_B2	PBOV1	chr6	138215986	138218491	-	protein_coding
ENSG00000274326.1	1.07522	2.37665	0.633573	3.75119	0.000175995	0.00538328	Up_In_B2	PCA3_1	chr9	76779657	76779917	+	NA
ENSG00000249158.5	8.30519	1.612	0.354102	4.55236	5.3e-06	0.000495326	Up_In_B2	PCDHA11	chr5	140868183	141012344	+	protein_coding
ENSG00000251664.3	4.48929	1.68931	0.319834	5.28185	1.28e-07	3.79e-05	Up_In_B2	PCDHA12	chr5	140875302	141012344	+	protein_coding
ENSG00000204961.6	1.68798	1.47231	0.341575	4.31038	1.63e-05	0.00103076	Up_In_B2	PCDHA9	chr5	140847463	141012344	+	protein_coding
ENSG00000255622.3	2.26452	1.15376	0.324724	3.55306	0.000380775	0.00929098	Up_In_B2	PCDHB17P	chr5	141155996	141159061	+	transcribed_unprocessed_pseudogene
ENSG00000253537.2	54.4803	1.22131	0.261574	4.66908	3.03e-06	0.000334582	Up_In_B2	PCDHGA7	chr5	141382739	141512979	+	protein_coding
ENSG00000248449.2	7.93254	1.06889	0.208332	5.13072	2.89e-07	6.99e-05	Up_In_B2	PCDHGB8P	chr5	141426286	141429158	+	transcribed_unitary_pseudogene
ENSG00000116703.13	3.03598	1.05147	0.312794	3.36155	0.000775074	0.0150419	Up_In_B2	PDC	chr1	186443566	186461122	-	protein_coding
ENSG00000182347.10	2.40376	3.01163	0.454593	6.6249	3.47e-11	1.18e-07	Up_In_B2	PDSS1P1	chr9	5084999	5086112	-	processed_pseudogene
ENSG00000155714.12	6.18379	1.11523	0.189469	5.8861	3.95e-09	3.03e-06	Up_In_B2	PDZD9	chr16	21983865	22001110	-	protein_coding
ENSG00000236278.2	0.704743	1.42972	0.446045	3.20532	0.00134911	0.0216781	Up_In_B2	PEBP1P3	chr1	198679139	198680033	-	processed_pseudogene
ENSG00000227205.4	0.845977	-1.21814	0.395665	-3.0787	0.00207905	0.0287515	Up_In_A2	PFN1P9	chr1	119853316	119853748	+	processed_pseudogene
ENSG00000270300.1	4.18633	1.70882	0.291933	5.85345	4.81e-09	3.57e-06	Up_In_B2	PHACTR2P1	chr10	119815229	119816642	-	transcribed_processed_pseudogene
ENSG00000230585.2	3.68583	1.68364	0.301199	5.58981	2.27e-08	1.17e-05	Up_In_B2	PHBP12	chr1	50780340	50781150	+	processed_pseudogene
ENSG00000267178.3	1.6313	1.04177	0.356063	2.92579	0.00343578	0.0398022	Up_In_B2	PHF5CP	chr19	19588091	19588415	-	processed_pseudogene
ENSG00000188771.4	1.11681	2.56909	0.570619	4.5023	6.72e-06	0.000567376	Up_In_B2	PLET1	chr11	112248479	112260860	-	protein_coding
ENSG00000175535.6	0.979405	-2.69823	1.06471	-2.53423	0.0112694	0.0879488	Up_In_A2	PNLIP	chr10	116545931	116567855	+	protein_coding
ENSG00000198883.10	6.03844	1.72266	0.328092	5.25055	1.52e-07	4.33e-05	Up_In_B2	PNMA5	chrX	152988824	152994127	-	protein_coding
ENSG00000229241.1	2.10807	1.6452	0.362375	4.54005	5.62e-06	0.000511057	Up_In_B2	PNPT1P1	chr3	3981981	3984295	-	processed_pseudogene
ENSG00000232970.1	1.13077	1.25196	0.445865	2.80795	0.00498585	0.0509476	Up_In_B2	POLHP1	chr2	216156342	216156811	-	processed_pseudogene
ENSG00000218189.4	0.493909	1.33431	0.675047	1.97662	0.0480841	0.210641	Up_In_B2	POM121L14P	chr6	57937458	57939015	+	processed_pseudogene
ENSG00000163736.3	337.003	2.56458	0.363282	7.05947	1.67e-12	6.61e-09	Up_In_B2	PPBP	chr4	73987038	73988197	-	protein_coding
ENSG00000230911.1	4.07854	1.52109	0.255073	5.96335	2.47e-09	2.09e-06	Up_In_B2	PPIHP1	chr11	112029858	112030367	-	processed_pseudogene
ENSG00000231765.1	0.771637	1.12132	0.472576	2.37278	0.0176549	0.114876	Up_In_B2	PPP1R11P2	chrX	57229034	57229415	+	processed_pseudogene
ENSG00000213133.4	1.08449	1.50791	0.34763	4.33769	1.44e-05	0.000952367	Up_In_B2	PPP1R14BP5	chr6	126257921	126258355	-	processed_pseudogene
ENSG00000106341.9	0.648005	1.58997	0.525098	3.02796	0.00246212	0.0320318	Up_In_B2	PPP1R17	chr7	31686715	31708455	+	protein_coding
ENSG00000108849.6	1.16043	-1.15515	0.427843	-2.69995	0.00693506	0.0638545	Up_In_A2	PPY	chr17	43940804	43942468	-	protein_coding
ENSG00000230657.5	0.960852	2.84595	0.873766	3.2571	0.00112555	0.0192464	Up_In_B2	PRB4	chr12	11307083	11310435	-	protein_coding
ENSG00000164256.8	0.498938	1.58605	0.800841	1.98048	0.0476493	0.209744	Up_In_B2	PRDM9	chr5	23507155	23528597	+	protein_coding
ENSG00000249140.1	1.42814	1.1802	0.322499	3.65956	0.000252652	0.00698387	Up_In_B2	PRDX2P3	chr5	179572156	179572741	+	processed_pseudogene
ENSG00000239926.1	1.35548	3.41291	0.70695	4.82765	1.38e-06	0.000197388	Up_In_B2	PRDX3P4	chr3	64174401	64175147	+	processed_pseudogene
ENSG00000235816.3	1.89233	1.95911	0.350857	5.58378	2.35e-08	1.17e-05	Up_In_B2	PRELID1P3	chr10	63427297	63427939	+	processed_pseudogene
ENSG00000134551.11	3.69261	1.02901	0.233904	4.3993	1.09e-05	0.000778141	Up_In_B2	PRH2	chr12	10929236	10932341	+	protein_coding
ENSG00000277563.1	0.567535	1.62431	0.684799	2.37195	0.0176946	0.115008	Up_In_B2	PRINS	chr10	24255246	24255333	+	NA
ENSG00000165059.6	0.698672	1.01722	0.322244	3.15667	0.00159584	0.0240461	Up_In_B2	PRKACG	chr9	69012505	69014113	-	protein_coding
ENSG00000233401.1	0.930324	1.47521	0.435668	3.38608	0.000708987	0.0140359	Up_In_B2	PRKAR1AP	chr1	92125301	92126462	+	NA
ENSG00000119973.4	1.31452	1.20729	0.395589	3.05188	0.0022741	0.0305927	Up_In_B2	PRLHR	chr10	118589989	118595699	-	protein_coding
ENSG00000232824.1	0.867189	1.99687	0.555833	3.59258	0.000327422	0.00844072	Up_In_B2	PRR13P1	chr1	198197779	198198186	-	processed_pseudogene
ENSG00000187533.12	1.2352	2.06719	0.471973	4.37989	1.19e-05	0.000825856	Up_In_B2	PRR27	chr4	70133616	70176799	+	protein_coding
ENSG00000203783.4	19.3483	1.86966	0.463368	4.03492	5.46e-05	0.00235531	Up_In_B2	PRR9	chr1	153217584	153219317	+	protein_coding
ENSG00000007038.9	54.289	-2.07517	0.345659	-6.0035	1.93e-09	1.91e-06	Up_In_A2	PRSS21	chr16	2817180	2826304	+	protein_coding
ENSG00000184647.9	1.08066	1.44296	0.470364	3.06775	0.00215677	0.0293978	Up_In_B2	PRSS55	chr8	10525546	10554166	+	protein_coding
ENSG00000237412.5	55.0147	1.8312	0.467194	3.91958	8.87e-05	0.00333504	Up_In_B2	PRSS56	chr2	232520463	232525716	+	protein_coding
ENSG00000254582.1	0.719818	2.052	0.588977	3.48401	0.000493955	0.0111786	Up_In_B2	PSMA2P1	chr11	87329407	87330052	-	processed_pseudogene
ENSG00000251234.1	1.03496	2.03293	0.525972	3.86508	0.000111051	0.00391933	Up_In_B2	PSMA2P2	chr8	93939364	93942877	-	processed_pseudogene
ENSG00000236348.1	0.731431	1.02986	0.354477	2.90529	0.00366912	0.041577	Up_In_B2	PSMC1P10	chr2	17385091	17386417	+	processed_pseudogene
ENSG00000182077.9	1.22696	1.78578	0.486112	3.6736	0.000239156	0.00672841	Up_In_B2	PTCHD3	chr10	27398187	27414368	-	protein_coding
ENSG00000182077.9	1.22696	1.78578	0.486112	3.6736	0.000239156	0.00672841	Up_In_B2	PTCHD3	chr10	27398187	27414368	-	polymorphic_pseudogene
ENSG00000228196.1	2.07917	1.0171	0.338048	3.00875	0.00262327	0.0334855	Up_In_B2	PTPN2P1	chr1	178746683	178747754	-	processed_pseudogene
ENSG00000224117.1	1.55889	1.63477	0.348584	4.68976	2.74e-06	0.000318007	Up_In_B2	PTPN2P2	chr13	30553670	30554693	+	processed_pseudogene
ENSG00000213005.3	1.87636	1.02879	0.361011	2.84974	0.00437549	0.046935	Up_In_B2	PTTG3P	chr8	66767400	66768005	-	processed_pseudogene
ENSG00000258571.1	1.3576	1.71782	0.397563	4.32088	1.55e-05	0.000993496	Up_In_B2	PTTG4P	chr14	71085482	71085833	-	processed_pseudogene
ENSG00000257151.1	83.0628	1.04502	0.233641	4.47278	7.72e-06	0.000632891	Up_In_B2	PWAR6	chr15	25031873	25036490	+	NA
ENSG00000270524.1	2.3844	4.06883	0.936864	4.34303	1.41e-05	0.00093887	Up_In_B2	QTRT1P1	chrX	113882590	113883667	+	processed_pseudogene
ENSG00000102128.7	2.74375	1.31381	0.300361	4.3741	1.22e-05	0.000843135	Up_In_B2	RAB40AL	chrX	102937250	102938962	+	protein_coding
ENSG00000213731.2	2.08879	1.7496	0.607682	2.87914	0.00398763	0.0441319	Up_In_B2	RAB5CP1	chr10	74423435	74424014	-	processed_pseudogene
ENSG00000175097.6	0.960782	1.02593	0.402363	2.54976	0.0107798	0.085455	Up_In_B2	RAG2	chr11	36575574	36598279	-	protein_coding
ENSG00000164188.7	9.33056	1.23384	0.22425	5.50208	3.75e-08	1.68e-05	Up_In_B2	RANBP3L	chr5	36248434	36302114	-	protein_coding
ENSG00000258769.1	3.14314	1.12411	0.277479	4.05116	5.1e-05	0.00223939	Up_In_B2	RAP1AP	chr14	74482985	74483435	+	processed_pseudogene
ENSG00000230399.1	1.56585	2.06108	0.455525	4.52463	6.05e-06	0.000533436	Up_In_B2	RBBP8P1	chrX	118632375	118634218	-	processed_pseudogene
ENSG00000227087.4	1.00758	1.34481	0.373221	3.60326	0.000314246	0.00819908	Up_In_B2	RBMX2P5	chr5	80331573	80332541	-	processed_pseudogene
ENSG00000234159.1	0.932277	2.92135	0.770997	3.78906	0.00015122	0.00483653	Up_In_B2	RBPMSLP	chr21	15744004	15745080	-	processed_pseudogene
ENSG00000249558.1	0.769033	2.30459	0.739807	3.11513	0.00183866	0.0264528	Up_In_B2	RCC2P4	chr3	126766434	126767475	-	processed_pseudogene
ENSG00000183324.9	1.41543	1.1379	0.349583	3.25502	0.00113383	0.0193461	Up_In_B2	REC114	chr15	73443158	73560014	+	protein_coding
ENSG00000172023.6	1059.27	1.78424	0.439349	4.06111	4.88e-05	0.00218849	Up_In_B2	REG1B	chr2	79085030	79088019	-	protein_coding
ENSG00000237446.1	1.02702	2.18292	0.690273	3.1624	0.00156476	0.0238046	Up_In_B2	RHEBP3	chr22	18019214	18020200	+	processed_pseudogene
ENSG00000203877.6	2.55147	-1.8374	0.554308	-3.31476	0.000917229	0.0167426	Up_In_A2	RIPPLY2	chr6	83853266	83857515	+	protein_coding
ENSG00000239373.3	0.880409	2.38437	0.861213	2.76862	0.00562938	0.0553762	Up_In_B2	RN7SL425P	chr1	171492411	171492704	+	NA
ENSG00000241774.3	0.59393	1.8448	0.730888	2.52406	0.011601	0.0893934	Up_In_B2	RN7SL438P	chr15	69250525	69250795	-	NA
ENSG00000242463.3	0.538868	1.54511	0.672036	2.29914	0.0214969	0.130024	Up_In_B2	RN7SL500P	chr22	50371210	50371496	+	NA
ENSG00000230833.1	0.938295	2.53796	0.716092	3.54418	0.00039383	0.00951167	Up_In_B2	RPEP3	chr1	27739954	27740629	+	processed_pseudogene
ENSG00000233010.1	1.1207	2.8889	0.722551	3.9982	6.38e-05	0.00260991	Up_In_B2	RPEP4	chr22	29608900	29609501	+	processed_pseudogene
ENSG00000213400.3	2.57273	1.37272	0.310116	4.42649	9.58e-06	0.000716602	Up_In_B2	RPL12P18	chr2	84874696	84875020	+	processed_pseudogene
ENSG00000233189.1	1.47485	1.10306	0.372523	2.96106	0.00306584	0.0370537	Up_In_B2	RPL12P29	chr10	84389170	84389626	-	processed_pseudogene
ENSG00000232687.1	1.468	1.3438	0.336906	3.98866	6.64e-05	0.0026904	Up_In_B2	RPL12P9	chr21	29127701	29128188	-	processed_pseudogene
ENSG00000241890.1	0.701707	1.29594	0.44427	2.917	0.00353411	0.0405188	Up_In_B2	RPL13P4	chr15	75388267	75388828	+	processed_pseudogene
ENSG00000219547.1	2.3198	2.05048	0.378394	5.41889	6e-08	2.24e-05	Up_In_B2	RPL17P25	chr6	80374015	80374569	-	processed_pseudogene
ENSG00000241067.2	0.834716	2.11159	0.582979	3.62207	0.00029225	0.0077576	Up_In_B2	RPL17P40	chr16	16094192	16095209	-	processed_pseudogene
ENSG00000225043.1	0.934949	1.03743	0.387965	2.67403	0.00749451	0.0674562	Up_In_B2	RPL18AP2	chr21	46420553	46421034	-	processed_pseudogene
ENSG00000214359.3	4.38093	1.01517	0.266169	3.814	0.000136734	0.00451661	Up_In_B2	RPL18P10	chr13	50099331	50099868	+	processed_pseudogene
ENSG00000213307.4	3.0308	-1.09642	0.276981	-3.95846	7.54e-05	0.00296643	Up_In_A2	RPL18P11	chr15	78661047	78661576	-	processed_pseudogene
ENSG00000240870.2	1.0964	2.5567	0.703418	3.63469	0.00027832	0.00750105	Up_In_B2	RPL19P14	chr8	98782055	98782628	+	processed_pseudogene
ENSG00000237816.1	1.08801	2.6236	0.567803	4.62062	3.83e-06	0.000388706	Up_In_B2	RPL21P109	chr13	71704181	71704655	+	processed_pseudogene
ENSG00000237382.2	1.26122	2.32772	0.501017	4.64599	3.38e-06	0.000356755	Up_In_B2	RPL21P121	chr17	18312760	18313533	+	processed_pseudogene
ENSG00000271215.1	2.0812	1.56202	0.334761	4.66606	3.07e-06	0.000334582	Up_In_B2	RPL21P136	chr12	12614359	12615907	-	processed_pseudogene
ENSG00000236776.1	0.887252	1.8819	0.637192	2.95343	0.0031426	0.0375077	Up_In_B2	RPL21P23	chr1	56538452	56538911	+	processed_pseudogene
ENSG00000258640.3	4.39923	1.02013	0.235234	4.33667	1.45e-05	0.000952996	Up_In_B2	RPL21P5	chr14	31111569	31112239	-	processed_pseudogene
ENSG00000228489.1	0.810462	2.63456	0.974272	2.70413	0.00684827	0.0633712	Up_In_B2	RPL21P50	chr4	123745750	123746226	-	processed_pseudogene
ENSG00000236863.2	1.21272	2.9368	0.661219	4.4415	8.93e-06	0.000685683	Up_In_B2	RPL23AP23	chr1	235295865	235296335	+	processed_pseudogene
ENSG00000242321.1	0.855437	2.74845	0.929196	2.95788	0.00309761	0.0372357	Up_In_B2	RPL23AP40	chr3	138796851	138797240	+	processed_pseudogene
ENSG00000232778.1	1.22747	2.19235	0.464936	4.71538	2.41e-06	0.000291939	Up_In_B2	RPL23AP50	chr6	107931800	107932254	+	processed_pseudogene
ENSG00000240991.3	1.81291	1.27067	0.305143	4.16418	3.12e-05	0.0016006	Up_In_B2	RPL23AP67	chr12	133125479	133125952	+	processed_pseudogene
ENSG00000244229.1	2.12443	1.61715	0.348206	4.64422	3.41e-06	0.00035823	Up_In_B2	RPL26P35	chr18	76834429	76834888	-	processed_pseudogene
ENSG00000226128.1	0.670052	2.77997	1.22966	2.26077	0.0237733	0.138295	Up_In_B2	RPL26P9	chr1	97585862	97586294	+	processed_pseudogene
ENSG00000239215.1	0.627377	2.39557	0.942685	2.54122	0.0110468	0.086807	Up_In_B2	RPL27P12	chr12	123721246	123721639	-	processed_pseudogene
ENSG00000234272.1	1.53598	1.61878	0.39909	4.05618	4.99e-05	0.0022127	Up_In_B2	RPL30P2	chr2	152131555	152131845	+	processed_pseudogene
ENSG00000219355.2	4.88093	1.68768	0.260007	6.49091	8.53e-11	2.25e-07	Up_In_B2	RPL31P52	chr12	120450437	120450803	-	processed_pseudogene
ENSG00000243053.2	1.49854	2.62852	0.536842	4.89625	9.77e-07	0.000160582	Up_In_B2	RPL31P58	chr17	28802444	28802822	+	processed_pseudogene
ENSG00000239988.1	0.643523	2.46356	1.18787	2.07392	0.0380863	0.184383	Up_In_B2	RPL31P60	chr19	32963499	32963865	+	processed_pseudogene
ENSG00000244451.1	1.14323	2.99123	0.702982	4.25507	2.09e-05	0.00121782	Up_In_B2	RPL34P21	chr11	130082495	130082781	-	processed_pseudogene
ENSG00000223676.1	2.41412	2.07164	0.424158	4.88412	1.04e-06	0.000167616	Up_In_B2	RPL34P26	chr13	50361410	50361763	-	processed_pseudogene
ENSG00000239223.3	6.32333	-1.032	0.275283	-3.74888	0.00017763	0.00541496	Up_In_A2	RPL34P31	chr17	27274107	27274477	+	processed_pseudogene
ENSG00000229814.1	2.30056	-1.09386	0.408355	-2.6787	0.00739089	0.066777	Up_In_A2	RPL35AP21	chr9	71589601	71589933	+	processed_pseudogene
ENSG00000264217.2	0.968054	2.90902	0.751811	3.86935	0.000109127	0.0038745	Up_In_B2	RPL35AP25	chr10	45940522	45940851	+	NA
ENSG00000243607.3	0.860221	1.55405	0.463196	3.35506	0.000793479	0.0152011	Up_In_B2	RPL35AP26	chr11	126278257	126278577	-	processed_pseudogene
ENSG00000243404.2	2.17001	1.2342	0.317139	3.89167	9.96e-05	0.00364046	Up_In_B2	RPL35AP32	chr15	66446455	66446777	-	processed_pseudogene
ENSG00000235369.1	2.69701	1.44815	0.290525	4.9846	6.21e-07	0.00011595	Up_In_B2	RPL36AP15	chr2	47797826	47798091	-	processed_pseudogene
ENSG00000224683.1	1.22252	1.34673	0.38942	3.4583	0.000543601	0.0120379	Up_In_B2	RPL36AP29	chr7	16208945	16209265	+	processed_pseudogene
ENSG00000235619.1	1.80212	3.23113	0.517968	6.23809	4.43e-10	6.57e-07	Up_In_B2	RPL36AP33	chr9	35507564	35507873	+	processed_pseudogene
ENSG00000242087.2	0.968774	1.99696	0.508806	3.92479	8.68e-05	0.00329309	Up_In_B2	RPL36AP41	chr12	63871739	63872044	-	processed_pseudogene
ENSG00000213180.4	1.84109	2.49552	0.390461	6.39123	1.65e-10	3.55e-07	Up_In_B2	RPL36AP48	chr17	67224728	67225041	+	processed_pseudogene
ENSG00000240454.1	0.904864	3.03751	1.00786	3.01384	0.00257964	0.0330353	Up_In_B2	RPL39P26	chr11	13685499	13685656	-	processed_pseudogene
ENSG00000242134.2	1.28717	3.21308	0.700044	4.58983	4.44e-06	0.000438369	Up_In_B2	RPL5P13	chr4	142286917	142287625	-	processed_pseudogene
ENSG00000234415.1	0.645925	1.64148	0.508726	3.22665	0.0012525	0.0205574	Up_In_B2	RPL5P7	chr2	173871653	173872465	-	processed_pseudogene
ENSG00000214671.4	1.21703	2.87513	0.595853	4.82523	1.4e-06	0.000197421	Up_In_B2	RPL6P12	chr4	169166272	169167117	+	processed_pseudogene
ENSG00000256243.2	2.22561	1.65146	0.317623	5.19944	2e-07	5.3e-05	Up_In_B2	RPL7AP3	chr14	35235180	35235651	-	processed_pseudogene
ENSG00000228000.1	1.46109	2.17922	0.448456	4.85938	1.18e-06	0.000179027	Up_In_B2	RPL7AP65	chr17	18311904	18312651	+	processed_pseudogene
ENSG00000231490.1	1.19075	3.051	0.755346	4.03921	5.36e-05	0.00231687	Up_In_B2	RPL7L1P2	chr7	51259429	51260167	-	processed_pseudogene
ENSG00000235090.1	2.13226	1.69256	0.342627	4.93993	7.82e-07	0.000135292	Up_In_B2	RPL7L1P3	chr7	75922755	75923443	+	processed_pseudogene
ENSG00000232994.1	0.763463	1.2362	0.428956	2.88189	0.00395295	0.0438573	Up_In_B2	RPL7P14	chr2	203040108	203040899	+	processed_pseudogene
ENSG00000214062.5	1.3565	1.0662	0.320226	3.32952	0.000869955	0.0161696	Up_In_B2	RPL7P17	chr4	77082403	77083126	-	processed_pseudogene
ENSG00000216636.1	1.53916	1.7899	0.404335	4.42678	9.56e-06	0.000716602	Up_In_B2	RPL7P25	chr6	34616538	34617258	+	processed_pseudogene
ENSG00000243020.1	1.64107	1.03329	0.302933	3.41096	0.000647349	0.0133069	Up_In_B2	RPL7P39	chr12	64867956	64868699	-	processed_pseudogene
ENSG00000214676.4	1.07418	1.41047	0.474004	2.97565	0.00292373	0.036072	Up_In_B2	RPL9P16	chr4	168755816	168756382	+	processed_pseudogene
ENSG00000240074.1	1.92674	2.78926	0.535612	5.20761	1.91e-07	5.16e-05	Up_In_B2	RPL9P30	chr17	29855759	29856332	+	processed_pseudogene
ENSG00000229455.2	1.43506	1.6894	0.374435	4.51187	6.43e-06	0.000554202	Up_In_B2	RPS10P18	chr10	124489823	124490578	-	processed_pseudogene
ENSG00000234319.1	1.2764	1.1163	0.314951	3.54435	0.000393577	0.00951167	Up_In_B2	RPS12P2	chr10	80215851	80216119	-	processed_pseudogene
ENSG00000240435.2	2.35532	1.07315	0.314645	3.41067	0.000648037	0.0133069	Up_In_B2	RPS12P27	chr16	68209442	68209778	+	processed_pseudogene
ENSG00000226216.1	0.62419	1.27128	0.631717	2.01242	0.0441753	0.200831	Up_In_B2	RPS12P5	chr3	29390848	29391218	+	processed_pseudogene
ENSG00000233072.1	1.55292	2.00573	0.468221	4.28373	1.84e-05	0.00112055	Up_In_B2	RPS15AP6	chr1	21003550	21003934	-	processed_pseudogene
ENSG00000217527.1	0.946619	2.07201	0.579073	3.57816	0.000346023	0.00879595	Up_In_B2	RPS16P5	chr6	53336943	53337346	-	transcribed_processed_pseudogene
ENSG00000227523.1	0.955847	1.37778	0.385964	3.56972	0.000357364	0.0089594	Up_In_B2	RPS20P15	chr3	27462506	27462816	+	processed_pseudogene
ENSG00000239218.2	4.04289	1.01179	0.258168	3.91913	8.89e-05	0.00333504	Up_In_B2	RPS20P22	chr8	38434347	38435664	-	transcribed_processed_pseudogene
ENSG00000240925.1	0.97966	2.36279	0.61312	3.85372	0.000116337	0.00403388	Up_In_B2	RPS20P31	chr12	120247460	120247791	+	processed_pseudogene
ENSG00000251374.1	1.68707	1.93495	0.350177	5.52562	3.28e-08	1.5e-05	Up_In_B2	RPS23P5	chr5	82265157	82265259	-	processed_pseudogene
ENSG00000220237.1	1.49438	1.34644	0.361674	3.72279	0.00019703	0.00580493	Up_In_B2	RPS24P12	chr6	107229759	107230152	+	processed_pseudogene
ENSG00000223688.2	0.713354	2.40849	0.937965	2.56779	0.010235	0.0825096	Up_In_B2	RPS24P14	chr11	3559657	3560022	+	processed_pseudogene
ENSG00000242634.1	2.46591	1.81285	0.450159	4.02713	5.65e-05	0.00241276	Up_In_B2	RPS24P16	chr15	67232446	67232837	+	processed_pseudogene
ENSG00000242829.1	0.971429	1.59471	0.442647	3.60267	0.000314962	0.00819973	Up_In_B2	RPS26P21	chr3	119298665	119299012	+	processed_pseudogene
ENSG00000226144.2	2.15417	1.64043	0.364181	4.50443	6.66e-06	0.000566029	Up_In_B2	RPS27AP3	chr20	37049254	37049707	+	processed_pseudogene
ENSG00000240873.1	0.743016	2.31143	0.677074	3.41385	0.000640516	0.0131901	Up_In_B2	RPS29P22	chr17	28116239	28116406	-	processed_pseudogene
ENSG00000244378.1	1.77198	1.7896	0.35114	5.09655	3.46e-07	7.81e-05	Up_In_B2	RPS2P45	chr16	69033675	69036042	+	transcribed_processed_pseudogene
ENSG00000237818.1	1.13116	1.18148	0.352988	3.34709	0.000816656	0.0154949	Up_In_B2	RPS3AP29	chr7	97898347	97899115	-	processed_pseudogene
ENSG00000231241.1	1.95489	1.20189	0.338791	3.5476	0.000388754	0.00944742	Up_In_B2	RPS3AP3	chr20	37021743	37021984	-	processed_pseudogene
ENSG00000178429.9	98.6052	-1.23125	0.210596	-5.84653	5.02e-09	3.61e-06	Up_In_A2	RPS3AP5	chr10	84560443	84561263	+	processed_pseudogene
ENSG00000244217.1	1.25337	1.82504	0.39054	4.67311	2.97e-06	0.000334582	Up_In_B2	RPS4XP10	chr8	94352923	94353653	+	processed_pseudogene
ENSG00000240167.1	1.60266	1.34893	0.383073	3.52135	0.00042936	0.0101933	Up_In_B2	RPS7P7	chr4	42471810	42472380	+	processed_pseudogene
ENSG00000104941.6	0.737942	1.04484	0.456805	2.28728	0.0221794	0.132468	Up_In_B2	RSPH6A	chr19	45795710	45815319	-	protein_coding
ENSG00000101282.7	21.1989	1.53988	0.324011	4.75257	2.01e-06	0.000254738	Up_In_B2	RSPO4	chr20	958452	1002264	-	protein_coding
ENSG00000213659.4	0.598077	2.46497	1.10531	2.23013	0.025739	0.145277	Up_In_B2	RSU1P3	chr10	51319826	51320660	+	processed_pseudogene
ENSG00000254656.1	1.40326	1.79572	0.564929	3.17868	0.0014795	0.0229943	Up_In_B2	RTL1	chr14	100880655	100884847	-	protein_coding
ENSG00000230741.1	1.14335	1.98405	0.43884	4.52112	6.15e-06	0.000538354	Up_In_B2	SC22CB-1D7.1	chr22	33320865	33322813	+	NA
ENSG00000275103.1	0.663904	2.40602	0.900819	2.67092	0.00756429	0.0677501	Up_In_B2	SCb-64M4.1	chr8	89826593	89833564	+	NA
ENSG00000164265.7	2.80459	1.41006	0.34389	4.10032	4.13e-05	0.00195702	Up_In_B2	SCGB3A2	chr5	147870682	147882191	+	protein_coding
ENSG00000258896.1	1.30839	1.19709	0.304832	3.92706	8.6e-05	0.00327357	Up_In_B2	SCOCP1	chr14	60158976	60159324	+	processed_pseudogene
ENSG00000164106.6	29.1107	1.13345	0.295178	3.83988	0.000123096	0.00417663	Up_In_B2	SCRG1	chr4	173384701	173406380	-	protein_coding
ENSG00000226705.1	0.891774	2.57919	0.771407	3.34349	0.000827325	0.0156598	Up_In_B2	SDCBPP1	chr10	6293100	6294684	-	processed_pseudogene
ENSG00000234946.1	1.56876	1.86976	0.367128	5.09295	3.53e-07	7.89e-05	Up_In_B2	SDHCP3	chr2	23943846	23944351	+	processed_pseudogene
ENSG00000223899.1	2.38067	1.09278	0.294772	3.70722	0.000209547	0.00608302	Up_In_B2	SEC13P1	chr3	33033863	33034810	+	processed_pseudogene
ENSG00000124157.6	3.57979	-1.34508	0.604145	-2.22642	0.0259857	0.145893	Up_In_A2	SEMG2	chr20	45221300	45224458	+	protein_coding
ENSG00000242550.4	0.418547	1.21249	0.527384	2.29906	0.0215016	0.130024	Up_In_B2	SERPINB10	chr18	63897174	63936111	+	protein_coding
ENSG00000114204.13	0.58431	1.12543	0.435135	2.58639	0.00969865	0.0798041	Up_In_B2	SERPINI2	chr3	167441789	167479004	-	protein_coding
ENSG00000180440.3	2.01075	1.63569	0.582269	2.80916	0.00496703	0.050857	Up_In_B2	SERTM1	chr13	36673912	36697839	+	protein_coding
ENSG00000231905.2	0.761801	2.20542	0.753032	2.92872	0.00340364	0.0395734	Up_In_B2	SETP10	chr1	179183734	179184547	+	processed_pseudogene
ENSG00000233998.1	3.25034	1.80612	0.347846	5.19228	2.08e-07	5.41e-05	Up_In_B2	SETP5	chr9	137640986	137641547	-	processed_pseudogene
ENSG00000230568.1	2.53397	1.04676	0.292839	3.57453	0.00035086	0.00886191	Up_In_B2	SF3A3P1	chr20	3489529	3491005	-	processed_pseudogene
ENSG00000104332.10	218.029	1.11135	0.305174	3.64169	0.000270852	0.00734987	Up_In_B2	SFRP1	chr8	41261958	41309497	-	protein_coding
ENSG00000224751.2	0.93381	1.8216	0.476	3.82689	0.000129773	0.00432886	Up_In_B2	SHMT1P1	chr1	43850300	43851611	-	processed_pseudogene
ENSG00000112246.8	0.63534	1.51789	0.672597	2.25675	0.0240235	0.139225	Up_In_B2	SIM1	chr6	100385015	100464929	-	protein_coding
ENSG00000125255.6	1.43618	2.48735	0.599457	4.14934	3.33e-05	0.00167189	Up_In_B2	SLC10A2	chr13	103043998	103066846	-	protein_coding
ENSG00000188991.3	0.692518	1.7951	0.553953	3.24052	0.0011931	0.0199413	Up_In_B2	SLC15A5	chr12	16188485	16277685	-	protein_coding
ENSG00000196600.11	0.722241	2.26801	0.822458	2.7576	0.00582268	0.056756	Up_In_B2	SLC22A25	chr11	63163776	63229652	-	protein_coding
ENSG00000188467.9	0.578825	1.82941	0.611788	2.99027	0.00278729	0.0350139	Up_In_B2	SLC24A5	chr15	48120972	48142672	+	protein_coding
ENSG00000213608.5	1.58622	1.97683	0.392212	5.04021	4.65e-07	9.35e-05	Up_In_B2	SLC25A14P1	chr4	83477524	83478424	+	processed_pseudogene
ENSG00000226148.1	2.0454	1.56781	0.406737	3.85461	0.000115916	0.00402515	Up_In_B2	SLC25A39P1	chr1	202796030	202797094	+	processed_pseudogene
ENSG00000232846.1	0.636719	2.43657	0.972335	2.5059	0.012214	0.0920854	Up_In_B2	SLC25A6P3	chr1	51709062	51709940	+	processed_pseudogene
ENSG00000137860.10	419.062	-1.5852	0.326978	-4.84804	1.25e-06	0.000186681	Up_In_A2	SLC28A2	chr15	45252230	45277845	+	protein_coding
ENSG00000163581.12	3.69193	1.01605	0.395115	2.57153	0.0101251	0.0819579	Up_In_B2	SLC2A2	chr3	170996348	171026750	-	protein_coding
ENSG00000151812.13	2.56471	1.07065	0.313557	3.41455	0.000638884	0.0131875	Up_In_B2	SLC35F4	chr14	57563922	57982194	-	protein_coding
ENSG00000186335.7	1.13946	1.40241	0.409801	3.42217	0.000621234	0.0129513	Up_In_B2	SLC36A2	chr5	151314978	151347590	-	protein_coding
ENSG00000004939.12	1.81466	1.13149	0.334052	3.38717	0.000706173	0.014027	Up_In_B2	SLC4A1	chr17	44248385	44268141	-	protein_coding
ENSG00000256870.2	12.8755	2.33924	0.497591	4.70114	2.59e-06	0.000308341	Up_In_B2	SLC5A8	chr12	101155493	101210407	-	protein_coding
ENSG00000179542.14	22.6092	1.1138	0.293862	3.79022	0.000150512	0.00483044	Up_In_B2	SLITRK4	chrX	143622790	143635777	-	protein_coding
ENSG00000225215.1	0.791788	1.18047	0.442121	2.67001	0.00758496	0.0678328	Up_In_B2	SMARCE1P1	chr11	107403404	107404589	-	processed_pseudogene
ENSG00000253457.2	2.47366	1.44903	0.306237	4.73173	2.23e-06	0.000276425	Up_In_B2	SMIM18	chr8	30638600	30646064	+	protein_coding
ENSG00000271417.2	1.98357	2.11958	0.418507	5.06462	4.09e-07	8.59e-05	Up_In_B2	SNHG24	chr14	100967652	100987280	+	NA
ENSG00000281551.1	0.600799	1.32246	0.494878	2.6723	0.00753332	0.0675577	Up_In_B2	snoMe28S-Am2634	chr2	241284869	241284946	+	NA
ENSG00000212461.1	1.36767	3.55911	1.10707	3.21488	0.00130497	0.0211696	Up_In_B2	SNORA17	chr12	71639355	71639483	+	NA
ENSG00000221491.2	4.05907	1.2532	0.276645	4.52999	5.9e-06	0.000526475	Up_In_B2	SNORA34	chr12	48654382	48654518	-	NA
ENSG00000206731.1	1.05444	1.09253	0.349046	3.13003	0.00174786	0.0255731	Up_In_B2	SNORA36	chr2	27642043	27642169	-	NA
ENSG00000207217.1	2.80403	1.04226	0.259046	4.02344	5.74e-05	0.00243341	Up_In_B2	SNORA42	chr7	6016877	6017011	+	NA
ENSG00000281863.1	0.921599	2.90029	0.808427	3.58757	0.000333774	0.00858152	Up_In_B2	SNORA43	chr3	8931495	8931632	+	NA
ENSG00000252122.1	0.590411	2.25295	0.91487	2.46259	0.0137936	0.0995563	Up_In_B2	SNORA76	chr16	75409332	75409466	-	NA
ENSG00000252904.1	1.38354	3.8079	1.58037	2.4095	0.0159744	0.108976	Up_In_B2	SNORA76	chr5	65961183	65961319	-	NA
ENSG00000281910.1	1.29517	3.4541	1.00812	3.4263	0.00061187	0.0128536	Up_In_B2	SNORA76A	chr16	58559796	58559931	-	NA
ENSG00000207109.1	0.928636	3.08366	1.09909	2.80565	0.00502145	0.0511721	Up_In_B2	SNORD38	chr3	53333060	53333128	-	NA
ENSG00000207199.1	1.04978	3.08584	0.900706	3.42603	0.000612483	0.0128551	Up_In_B2	SNORD38	chr8	39018615	39018683	-	NA
ENSG00000252408.1	0.973812	2.39467	0.542838	4.41138	1.03e-05	0.000751878	Up_In_B2	SNORD38	chr19	3521248	3521320	-	NA
ENSG00000252438.1	1.13298	3.44964	1.22939	2.80599	0.00501629	0.0511704	Up_In_B2	SNORD45	chr10	12415928	12416000	+	NA
ENSG00000265706.1	2.67849	1.09322	0.267957	4.07984	4.51e-05	0.0020754	Up_In_B2	SNORD53_SNORD92	chr2	28927983	28928060	+	NA
ENSG00000221611.1	1.65967	1.06403	0.3201	3.32407	0.00088713	0.0163354	Up_In_B2	SNORD88	chr12	12972053	12972143	+	NA
ENSG00000201882.1	1.07472	1.21895	0.4036	3.02019	0.00252612	0.0325609	Up_In_B2	snoU2-30	chrX	20136066	20136135	-	NA
ENSG00000249799.1	1.3439	1.01101	0.361546	2.79636	0.00516816	0.0522477	Up_In_B2	SNRPCP13	chr4	9583942	9584131	-	processed_pseudogene
ENSG00000264186.1	0.868623	2.15487	0.645565	3.33797	0.00084394	0.0159078	Up_In_B2	SNRPCP4	chr18	2990652	2991078	+	processed_pseudogene
ENSG00000214124.3	0.641487	1.91079	0.700096	2.72933	0.00634637	0.0603032	Up_In_B2	SNRPEP9	chrX	24513450	24513687	+	processed_pseudogene
ENSG00000257979.1	1.07537	3.4284	1.37809	2.48779	0.0128538	0.0951183	Up_In_B2	SNRPGP18	chr12	116169045	116169258	+	processed_pseudogene
ENSG00000235763.1	1.81854	1.56742	0.397819	3.94004	8.15e-05	0.00314172	Up_In_B2	SNRPGP5	chr10	13104574	13104793	-	processed_pseudogene
ENSG00000167780.10	7.14156	1.43175	0.306867	4.66572	3.08e-06	0.000334582	Up_In_B2	SOAT2	chr12	53103518	53124538	+	protein_coding
ENSG00000225530.1	1.99868	1.09423	0.413643	2.64534	0.00816095	0.0706846	Up_In_B2	SP3P	chr13	89361160	89363224	-	processed_pseudogene
ENSG00000147059.8	7.84328	1.02003	0.207587	4.91374	8.94e-07	0.000152464	Up_In_B2	SPIN2A	chrX	57134530	57137625	-	protein_coding
ENSG00000168630.3	0.99297	3.33084	1.14089	2.91951	0.00350584	0.040324	Up_In_B2	SPINT5P	chr20	45749920	45750074	+	processed_pseudogene
ENSG00000230397.1	0.917947	1.0506	0.388746	2.70254	0.00688111	0.0635264	Up_In_B2	SPTLC1P1	chr10	31360955	31361215	+	transcribed_processed_pseudogene
ENSG00000258485.2	1.30137	2.38635	0.539418	4.42394	9.69e-06	0.000718664	Up_In_B2	SRMP2	chr14	60919240	60920155	-	processed_pseudogene
ENSG00000237307.2	6.804	1.33992	0.250427	5.35052	8.77e-08	2.89e-05	Up_In_B2	SRRM1P3	chrX	136976417	136985705	-	processed_pseudogene
ENSG00000154548.8	15.4906	1.05392	0.198035	5.32188	1.03e-07	3.29e-05	Up_In_B2	SRSF12	chr6	89095959	89118081	-	protein_coding
ENSG00000220598.1	0.94512	2.53819	0.653993	3.88106	0.000104002	0.00374864	Up_In_B2	SSR1P1	chr6	150384307	150385120	-	processed_pseudogene
ENSG00000213234.4	2.22921	1.00796	0.252713	3.98856	6.65e-05	0.0026904	Up_In_B2	ST13P10	chr11	112267290	112268371	-	processed_pseudogene
ENSG00000260247.1	0.912088	1.25262	0.505202	2.47944	0.013159	0.0963247	Up_In_B2	SUB1P4	chr16	23537061	23537556	+	processed_pseudogene
ENSG00000229612.1	1.11889	1.30047	0.40691	3.19597	0.00139362	0.0221679	Up_In_B2	SUMO1P2	chr1	168898136	168898439	+	processed_pseudogene
ENSG00000228976.1	1.26665	2.82005	0.713976	3.94978	7.82e-05	0.00304135	Up_In_B2	SUMO2P8	chr6	108618000	108618285	-	processed_pseudogene
ENSG00000177688.6	6.39271	1.17012	0.217036	5.39138	6.99e-08	2.48e-05	Up_In_B2	SUMO4	chr6	149400227	149401292	+	protein_coding
ENSG00000233148.2	0.908776	2.08491	0.582382	3.57996	0.000343645	0.0087501	Up_In_B2	SYF2P2	chr9	35010703	35011285	+	processed_pseudogene
ENSG00000115353.9	25.3666	1.0361	0.24988	4.1464	3.38e-05	0.00168994	Up_In_B2	TACR1	chr2	75046463	75199700	-	protein_coding
ENSG00000212128.2	1.70084	1.87147	0.393206	4.75951	1.94e-06	0.000251353	Up_In_B2	TAS2R13	chr12	10907926	10909562	-	protein_coding
ENSG00000256436.1	4.87021	1.01164	0.236772	4.27264	1.93e-05	0.00115988	Up_In_B2	TAS2R31	chr12	11030387	11031407	-	protein_coding
ENSG00000255374.2	2.52724	2.35328	0.393971	5.97322	2.33e-09	2.09e-06	Up_In_B2	TAS2R43	chr12	11091287	11134244	-	protein_coding
ENSG00000226761.3	1.72161	2.12212	0.461701	4.59631	4.3e-06	0.000426749	Up_In_B2	TAS2R46	chr12	11061365	11062294	-	protein_coding
ENSG00000234066.1	0.577735	1.67504	0.745053	2.24822	0.024562	0.140812	Up_In_B2	TAS2R62P	chr7	143437034	143437973	+	unitary_pseudogene
ENSG00000256019.1	2.02961	3.1769	0.532298	5.96827	2.4e-09	2.09e-06	Up_In_B2	TAS2R63P	chr12	11048332	11049256	-	unprocessed_pseudogene
ENSG00000256019.1	2.02961	3.1769	0.532298	5.96827	2.4e-09	2.09e-06	Up_In_B2	TAS2R63P	chr12	11048332	11049256	-	processed_pseudogene
ENSG00000235205.1	0.654275	2.28264	0.846884	2.69534	0.0070316	0.0643758	Up_In_B2	TATDN2P3	chr13	23243520	23247184	+	processed_pseudogene
ENSG00000278599.3	1.69783	-1.02198	0.435999	-2.344	0.019078	0.120371	Up_In_A2	TBC1D3E	chr17	38005561	38138862	+	protein_coding
ENSG00000235829.1	1.71132	1.53486	0.629862	2.43682	0.0148172	0.104032	Up_In_B2	TBCAP2	chr1	14692129	14692613	-	processed_pseudogene
ENSG00000249055.1	2.56331	1.57943	0.314972	5.01451	5.32e-07	0.000103172	Up_In_B2	TBCAP3	chr4	98909537	98909848	-	transcribed_processed_pseudogene
ENSG00000092377.12	3.41328	-1.35606	0.583566	-2.32375	0.0201391	0.124772	Up_In_A2	TBL1Y	chrY	6910686	7091683	+	protein_coding
ENSG00000256021.1	2.28303	2.15137	0.373851	5.75462	8.68e-09	5.57e-06	Up_In_B2	TCEB1P31	chr12	21447545	21448314	-	NA
ENSG00000271278.1	1.52948	3.43317	0.754306	4.55143	5.33e-06	0.000495571	Up_In_B2	TCEB1P33	chr4	39932454	39933561	+	NA
ENSG00000206181.5	0.72036	1.30796	0.580772	2.25211	0.024315	0.140099	Up_In_B2	TCEB3B	chr18	47032572	47035621	-	NA
ENSG00000254274.1	2.84651	1.6783	0.330436	5.07905	3.79e-07	8.18e-05	Up_In_B2	TDGF1P5	chr8	54073114	54073566	+	processed_pseudogene
ENSG00000241438.1	1.84907	2.53363	0.461024	5.49566	3.89e-08	1.71e-05	Up_In_B2	TDGF1P6	chr3	136155549	136155996	+	processed_pseudogene
ENSG00000175664.8	0.964915	1.05313	0.371241	2.83678	0.00455711	0.048272	Up_In_B2	TEX26	chr13	30932703	30975502	+	protein_coding
ENSG00000166948.8	1.43474	1.34401	0.654755	2.05269	0.0401025	0.190336	Up_In_B2	TGM6	chr20	2380908	2432753	+	protein_coding
ENSG00000236900.1	0.908084	2.98541	0.985284	3.03	0.00244554	0.0319212	Up_In_B2	TIMM9P1	chr10	74344550	74344805	-	processed_pseudogene
ENSG00000232608.1	1.77202	1.45816	0.38528	3.78467	0.000153913	0.00488668	Up_In_B2	TIMM9P2	chr21	39216624	39217506	+	processed_pseudogene
ENSG00000007350.15	7.74366	2.3691	0.331218	7.1527	8.51e-13	4.04e-09	Up_In_B2	TKTL1	chrX	154295671	154330350	+	protein_coding
ENSG00000226783.1	0.847634	1.34226	0.397196	3.37933	0.000726635	0.0143341	Up_In_B2	TLK1P1	chr9	122685933	122688372	+	processed_pseudogene
ENSG00000164438.5	1.98403	-1.28946	0.398402	-3.23658	0.00120969	0.0201456	Up_In_A2	TLX3	chr5	171309284	171312134	+	protein_coding
ENSG00000232467.2	2.86605	1.73185	0.313147	5.53048	3.19e-08	1.49e-05	Up_In_B2	TMA16P2	chr1	45846994	45847594	-	processed_pseudogene
ENSG00000215367.9	1.29016	2.30549	0.529345	4.35536	1.33e-05	0.000897659	Up_In_B2	TMED11P	chr4	1115197	1153726	-	transcribed_unitary_pseudogene
ENSG00000235254.3	0.53348	1.56217	0.468252	3.33617	0.000849423	0.015976	Up_In_B2	TMEM185AP1	chrX	149768897	149771368	+	unprocessed_pseudogene
ENSG00000187054.13	1.30406	2.3396	0.672436	3.47929	0.000502744	0.011345	Up_In_B2	TMPRSS11A	chr4	67909385	67964140	-	protein_coding
ENSG00000232398.1	2.12705	1.02981	0.314737	3.27198	0.00106796	0.0185152	Up_In_B2	TMPRSS11CP	chr4	67766480	67773854	-	unprocessed_pseudogene
ENSG00000186452.9	0.775139	2.02328	0.613549	3.29766	0.000974927	0.0173003	Up_In_B2	TMPRSS12	chr12	50842920	50887884	+	protein_coding
ENSG00000205456.10	1.02915	1.34671	0.431297	3.12247	0.0017934	0.0259852	Up_In_B2	TP53TG3D	chr16	32252719	32255922	+	protein_coding
ENSG00000186743.2	2.44492	1.18109	0.276715	4.26827	1.97e-05	0.00117829	Up_In_B2	TPI1P3	chr6	116038756	116039495	+	processed_pseudogene
ENSG00000213050.5	1.63865	1.99743	0.413137	4.83479	1.33e-06	0.000192757	Up_In_B2	TPM3P1	chr7	116972165	116972911	-	processed_pseudogene
ENSG00000234562.1	0.987379	2.48329	0.66007	3.76216	0.000168452	0.00520206	Up_In_B2	TPMTP2	chr3	42145646	42146371	-	processed_pseudogene
ENSG00000260452.1	1.92622	2.13199	0.416756	5.11569	3.13e-07	7.2e-05	Up_In_B2	TPRKBP2	chr16	28111173	28111647	-	processed_pseudogene
ENSG00000211879.1	0.72359	2.27574	0.720539	3.15838	0.00158647	0.0239658	Up_In_B2	TRAJ10	chr14	22533497	22533560	+	TR_J_gene
ENSG00000211877.1	0.616117	1.41248	0.60927	2.31832	0.0204321	0.1259	Up_In_B2	TRAJ12	chr14	22531939	22531998	+	TR_J_gene
ENSG00000211876.1	0.84409	2.66508	0.86164	3.09304	0.0019812	0.0279858	Up_In_B2	TRAJ13	chr14	22531076	22531138	+	TR_J_gene
ENSG00000211875.1	0.602426	2.063	0.868802	2.37453	0.0175713	0.114677	Up_In_B2	TRAJ14	chr14	22530327	22530378	+	TR_J_gene
ENSG00000211873.1	0.60872	2.19844	0.7836	2.80556	0.00502292	0.0511721	Up_In_B2	TRAJ16	chr14	22528527	22528586	+	TR_J_gene
ENSG00000211858.1	0.566761	1.52134	0.651524	2.33505	0.0195406	0.122304	Up_In_B2	TRAJ31	chr14	22510968	22511024	+	TR_J_gene
ENSG00000211851.1	0.65336	1.49318	0.614481	2.42998	0.0150997	0.10533	Up_In_B2	TRAJ38	chr14	22502231	22502292	+	TR_J_gene
ENSG00000211850.1	0.715348	1.49091	0.483382	3.08432	0.00204015	0.028504	Up_In_B2	TRAJ39	chr14	22501601	22501663	+	TR_J_gene
ENSG00000211883.1	0.707488	1.584	0.598009	2.64879	0.00807798	0.0702036	Up_In_B2	TRAJ6	chr14	22539073	22539134	+	TR_J_gene
ENSG00000256590.2	0.654032	-1.08808	0.547265	-1.98822	0.0467878	0.207569	Up_In_A2	TRDV3	chr14	22469041	22469698	-	TR_V_gene
ENSG00000188056.10	3.80244	1.60097	0.375912	4.25889	2.05e-05	0.00120524	Up_In_B2	TREML4	chr6	41228324	41238882	+	protein_coding
ENSG00000174417.2	0.693931	1.69507	0.650547	2.60561	0.00917096	0.076986	Up_In_B2	TRHR	chr8	109086621	109119584	+	protein_coding
ENSG00000223558.1	0.823182	1.88737	0.473426	3.98662	6.7e-05	0.00270479	Up_In_B2	TRIM60P17	chr7	64085560	64086576	+	processed_pseudogene
ENSG00000072315.3	0.862453	1.54298	0.472987	3.2622	0.00110549	0.0189993	Up_In_B2	TRPC5	chrX	111774315	112082776	-	protein_coding
ENSG00000127412.5	1.64476	1.04521	0.34427	3.03602	0.00239726	0.0315712	Up_In_B2	TRPV5	chr7	142908101	142933808	-	protein_coding
ENSG00000230604.2	1.29077	1.9715	0.445723	4.42316	9.73e-06	0.000718664	Up_In_B2	TSEN15P2	chr1	51859778	51860135	+	processed_pseudogene
ENSG00000178021.10	1.28584	2.08901	0.515191	4.05482	5.02e-05	0.00221982	Up_In_B2	TSPYL6	chr2	54253184	54256272	-	protein_coding
ENSG00000224885.1	3.43993	1.1626	0.266016	4.37042	1.24e-05	0.000854951	Up_In_B2	TSSC1-IT1	chr2	3298341	3301465	-	NA
ENSG00000137473.16	9.71407	1.92177	0.557297	3.44838	0.000563965	0.0122515	Up_In_B2	TTC29	chr4	146706638	146945882	-	protein_coding
ENSG00000224802.2	0.960029	2.0239	0.477068	4.24237	2.21e-05	0.00127013	Up_In_B2	TUBB4BP2	chr9	34109171	34109968	-	processed_pseudogene
ENSG00000223584.1	0.806075	2.28872	0.803722	2.84765	0.00440432	0.047159	Up_In_B2	TVP23CP1	chr7	90631906	90632568	+	processed_pseudogene
ENSG00000262470.2	1.39743	2.35612	0.502128	4.69228	2.7e-06	0.000317219	Up_In_B2	TVP23CP2	chr16	14200357	14200979	+	processed_pseudogene
ENSG00000204193.9	0.496851	1.17982	0.575268	2.05091	0.0402756	0.190741	Up_In_B2	TXNDC8	chr9	110303521	110337884	-	protein_coding
ENSG00000259581.3	2.41538	1.36017	0.28367	4.7949	1.63e-06	0.000223129	Up_In_B2	TYRO3P	chr15	76258986	76261690	-	processed_pseudogene
ENSG00000258648.1	1.64612	1.8163	0.43384	4.18657	2.83e-05	0.00150597	Up_In_B2	UBE2CP1	chr14	30683045	30683598	-	processed_pseudogene
ENSG00000250384.1	1.25535	2.39509	0.558081	4.29166	1.77e-05	0.00109248	Up_In_B2	UBE2CP3	chr4	57072683	57073132	+	processed_pseudogene
ENSG00000224690.2	1.36845	1.01989	0.345998	2.94766	0.00320185	0.0379943	Up_In_B2	UBE2D3P3	chr1	150800473	150801031	+	processed_pseudogene
ENSG00000131982.5	0.61286	2.13382	0.831985	2.56473	0.0103256	0.083014	Up_In_B2	UBE2L2	chr12	20449655	20450083	-	processed_pseudogene
ENSG00000177414.12	0.625138	1.6617	0.656438	2.5314	0.011361	0.0884307	Up_In_B2	UBE2U	chr1	64203627	64267368	+	protein_coding
ENSG00000226632.1	1.10731	1.18438	0.342815	3.45487	0.000550567	0.0120991	Up_In_B2	UBE2V1P1	chr20	3361880	3362324	-	processed_pseudogene
ENSG00000226255.1	1.42519	1.20191	0.486767	2.46918	0.0135423	0.098432	Up_In_B2	UBE2V2P1	chr10	19051455	19052170	+	processed_pseudogene
ENSG00000231849.1	1.2777	3.40449	0.81931	4.15531	3.25e-05	0.00164559	Up_In_B2	UBE2V2P4	chr1	36241898	36242156	-	processed_pseudogene
ENSG00000228445.1	0.859672	1.72966	0.552087	3.13294	0.00173062	0.0253678	Up_In_B2	UGT1A2P	chr2	233747214	233748079	+	unprocessed_pseudogene
ENSG00000243135.4	1.76993	1.08852	0.370929	2.93458	0.00334003	0.0390802	Up_In_B2	UGT1A3	chr2	233729108	233773299	+	protein_coding
ENSG00000244474.4	0.762243	2.16602	0.60558	3.57677	0.000347868	0.00882394	Up_In_B2	UGT1A4	chr2	233718778	233773299	+	protein_coding
ENSG00000240224.1	0.514775	1.35498	0.67069	2.02028	0.0433539	0.198653	Up_In_B2	UGT1A5	chr2	233712992	233773299	+	protein_coding
ENSG00000244122.2	3.41998	1.21517	0.28977	4.19359	2.75e-05	0.00148003	Up_In_B2	UGT1A7	chr2	233681938	233773299	+	protein_coding
ENSG00000213759.7	2.29284	1.31017	0.367054	3.56942	0.000357774	0.00896023	Up_In_B2	UGT2B11	chr4	69004618	69214731	-	protein_coding
ENSG00000223650.1	5.38935	3.29921	0.436293	7.56192	3.97e-14	3.14e-10	Up_In_B2	UHRF2P1	chrX	74105572	74107958	+	processed_pseudogene
ENSG00000137766.15	1.51339	1.10408	0.351419	3.14178	0.00167923	0.0248758	Up_In_B2	UNC13C	chr15	54012904	54633414	+	protein_coding
ENSG00000114638.6	2.22418	1.18371	0.352014	3.36269	0.000771864	0.0150065	Up_In_B2	UPK1B	chr3	119173517	119205153	+	protein_coding
ENSG00000100373.8	105.871	1.20072	0.269567	4.45425	8.42e-06	0.000656805	Up_In_B2	UPK3A	chr22	45284982	45295874	+	protein_coding
ENSG00000226430.5	0.54992	1.71295	0.735544	2.32882	0.0198687	0.123649	Up_In_B2	USP17L7	chr8	12132417	12134444	-	protein_coding
ENSG00000182583.11	0.963878	1.01464	0.461762	2.19732	0.0279974	0.153069	Up_In_B2	VCX	chrX	7842262	7844143	+	protein_coding
ENSG00000237679.2	2.50666	1.5274	0.30467	5.01329	5.35e-07	0.000103172	Up_In_B2	VDAC1P11	chr9	94287699	94288550	-	processed_pseudogene
ENSG00000235060.1	2.24765	1.66596	0.343941	4.84374	1.27e-06	0.000188046	Up_In_B2	VDAC1P4	chr1	180434800	180435936	+	processed_pseudogene
ENSG00000151650.7	171.938	-1.10089	0.26496	-4.15491	3.25e-05	0.00164559	Up_In_A2	VENTX	chr10	133237404	133241929	+	protein_coding
ENSG00000268545.1	0.75896	1.15925	0.41216	2.81262	0.00491396	0.0505177	Up_In_B2	VN1R107P	chr19	57459912	57460120	+	unprocessed_pseudogene
ENSG00000268598.1	1.71865	1.573	0.307387	5.11732	3.1e-07	7.2e-05	Up_In_B2	VN1R80P	chr19	21063924	21064261	+	unprocessed_pseudogene
ENSG00000269345.1	0.63625	1.04721	0.443776	2.35978	0.0182856	0.117587	Up_In_B2	VN1R85P	chr19	22174766	22175191	-	unprocessed_pseudogene
ENSG00000240375.1	0.71189	1.13992	0.486822	2.34156	0.0192033	0.120968	Up_In_B2	VPS26AP1	chr3	113919222	113920200	+	processed_pseudogene
ENSG00000174453.8	0.450448	1.16811	0.553737	2.1095	0.0349015	0.175484	Up_In_B2	VWC2L	chr2	214411065	214578959	+	protein_coding
ENSG00000174776.9	2.42165	1.40488	0.352045	3.99063	6.59e-05	0.00268077	Up_In_B2	WDR49	chr3	167478684	167653983	-	protein_coding
ENSG00000158901.10	1.32912	1.34206	0.564367	2.37799	0.0174073	0.114123	Up_In_B2	WFDC8	chr20	45551153	45579326	-	protein_coding
ENSG00000163092.18	0.781659	1.18236	0.544363	2.172	0.0298557	0.159264	Up_In_B2	XIRP2	chr2	166888487	167259753	+	protein_coding
ENSG00000240002.1	0.86924	2.66845	0.850139	3.13884	0.0016962	0.0250335	Up_In_B2	YBX1P3	chr3	114930541	114931449	+	processed_pseudogene
ENSG00000236745.2	1.09274	1.84899	0.455326	4.0608	4.89e-05	0.00218849	Up_In_B2	YRDCP2	chr9	96954820	96955461	+	processed_pseudogene
ENSG00000236564.1	1.75912	3.21287	0.588164	5.46254	4.69e-08	1.92e-05	Up_In_B2	YWHAQP5	chr2	98694109	98695490	+	processed_pseudogene
ENSG00000183432.6	1.02697	3.04287	0.91447	3.32747	0.000876386	0.0161696	Up_In_B2	ZBTB8OSP1	chr4	150720981	150721478	+	processed_pseudogene
ENSG00000238025.1	3.49274	1.5091	0.33763	4.4697	7.83e-06	0.000633915	Up_In_B2	ZDHHC4P1	chr13	42933858	42934892	+	processed_pseudogene
ENSG00000258917.1	2.34752	1.8528	0.344972	5.37087	7.84e-08	2.69e-05	Up_In_B2	ZMYND19P1	chr14	77696591	77697377	+	processed_pseudogene
ENSG00000197134.10	27.0106	1.11127	0.265797	4.18089	2.9e-05	0.00153543	Up_In_B2	ZNF257	chr19	22052452	22091480	+	protein_coding
ENSG00000108452.1	1.28719	1.51829	0.353895	4.29022	1.78e-05	0.00109672	Up_In_B2	ZNF29P	chr17	15675476	15675643	+	unprocessed_pseudogene
ENSG00000266127.1	0.611155	2.15876	0.807453	2.67354	0.00750555	0.0674789	Up_In_B2	ZNF415P1	chr18	9785108	9787805	+	processed_pseudogene
ENSG00000259738.1	0.717915	-1.80698	0.550829	-3.28047	0.00103636	0.0180839	Up_In_A2	ZNF444P1	chr15	58865006	58865303	+	processed_pseudogene
ENSG00000223965.2	1.45928	2.57393	0.514083	5.00683	5.53e-07	0.000105834	Up_In_B2	ZNF587P1	chr3	31794470	31796175	+	processed_pseudogene
ENSG00000182111.8	2.61174	2.34235	0.81644	2.86897	0.00411804	0.0451477	Up_In_B2	ZNF716	chr7	57450177	57473546	+	protein_coding
ENSG00000214652.5	5.47298	1.65308	0.285244	5.79533	6.82e-09	4.49e-06	Up_In_B2	ZNF727	chr7	64045443	64078549	+	protein_coding
ENSG00000217896.2	0.587431	2.15403	1.0398	2.07159	0.038304	0.184956	Up_In_B2	ZNF839P1	chrY	18985175	18986398	+	processed_pseudogene
ENSG00000215812.5	0.601909	1.66661	0.575807	2.89439	0.00379895	0.0426407	Up_In_B2	ZNF847P	chr1	227696892	227706699	-	unprocessed_pseudogene
ENSG00000241738.1	0.872076	1.24304	0.403129	3.08348	0.00204592	0.0285354	Up_In_B2	ZNF90P1	chr3	101357292	101359242	+	processed_pseudogene
ENSG00000251046.2	1.3654	1.52527	0.365457	4.17361	3e-05	0.00157314	Up_In_B2	ZNF969P	chr4	110415898	110418504	+	processed_pseudogene
ENSG00000197360.8	1.47015	1.02927	0.337711	3.04777	0.00230544	0.0308751	Up_In_B2	ZNF98	chr19	22391019	22532485	-	protein_coding
ENSG00000213973.7	2.40631	1.02986	0.290448	3.54576	0.000391487	0.00948407	Up_In_B2	ZNF99	chr19	22752183	22784107	-	protein_coding
ENSG00000170044.7	2.82361	1.1868	0.319084	3.7194	0.000199699	0.00585447	Up_In_B2	ZPLD1	chr3	102099244	102479841	+	protein_coding
