# Supplementary material for: Integrative multi-omics analysis identified FUT9 and MS4A3 as novel immune-phenotype and prognosis biomarkers for colorectal cancer and analyze the role of FUT9 in oncoimmunology
Source: Research Square preprint supplement (doi:10.21203/rs.3.rs-8306096/v1), 2025-12-09
Supplement: Supplementary file 5 [file fec26c333150b12196250170.xlsx]

## Sheet: Supplementary Table 4
Patient	cluster	No benefits	Responder	TIDE	IFNG	MSI Expr Sig	Merck18	CD274	CD8	CTL.flag	Dysfunction	Exclusion	MDSC	CAF	TAM M2
TCGA-3L-AA1B-01A	Cluster A2	FALSE	FALSE	0.68	0	0.5	0.01	-0.21	0	FALSE	0.89	0.68	0.03	-0.26	0.22
TCGA-4N-A93T-01A	Cluster A2	FALSE	FALSE	0.43	0	0.5	0.03	0.08	0	FALSE	0.74	0.43	0.28	-0.18	-0.04
TCGA-4T-AA8H-01A	Cluster A2	FALSE	FALSE	1.48	0	0.5	0.06	0.29	0	FALSE	1.14	1.48	0.26	-0.19	0.05
TCGA-5M-AAT6-01A	Cluster B2	FALSE	FALSE	2	0	0.5	0.03	0.4	0	TRUE	2	-0.49	-0.14	0.1	0.01
TCGA-A6-2675-01A	Cluster A2	FALSE	TRUE	-1.92	0	0.5	-0.03	-0.2	0	FALSE	-0.74	-1.92	-0.33	0.25	-0.12
TCGA-A6-2682-01A	Cluster A2	FALSE	FALSE	1.22	0	0.5	-0.06	-0.55	0	FALSE	-2.86	1.22	0.11	0.22	-0.11
TCGA-A6-2684-01A	Cluster B2	FALSE	TRUE	-0.57	0	0.49	-0.03	-0.29	0	FALSE	0.63	-0.57	-0.28	-0.1	0.17
TCGA-A6-4105-01A	Cluster B2	FALSE	TRUE	-0.36	0	0.5	-0.01	-0.06	0	TRUE	-0.36	-0.91	0.02	0.29	-0.18
TCGA-A6-5656-01A	Cluster A2	FALSE	TRUE	-1.95	0	0.5	0.02	0.25	0	FALSE	-0.67	-1.95	-0.03	-0.1	-0.09
TCGA-A6-5659-01A	Cluster A2	FALSE	TRUE	-1.45	0	0.5	0.03	0.11	0	FALSE	-0.47	-1.45	-0.02	-0.05	-0.11
TCGA-A6-5660-01A	Cluster A2	FALSE	TRUE	-1.47	0	0.5	-0.03	-0.2	0	TRUE	-1.47	-3.04	-0.31	-0.18	0
TCGA-A6-5662-01A	Cluster A2	FALSE	TRUE	-1.42	0	0.5	0.01	0.17	0	TRUE	-1.42	-1.56	0.05	-0.08	-0.08
TCGA-A6-6138-01A	Cluster B2	FALSE	FALSE	1.18	0	0.5	0.03	0.13	0	TRUE	1.18	-4.57	-0.17	-0.2	-0.14
TCGA-A6-6141-01A	Cluster B2	FALSE	FALSE	3.23	0	0.5	0.03	-0.24	0	TRUE	3.23	-0.54	0.03	-0.26	0.12
TCGA-A6-6142-01A	Cluster A2	FALSE	TRUE	-2.63	0	0.5	-0.06	-0.11	0	TRUE	-2.63	-1.5	-0.01	0.26	-0.32
TCGA-A6-6648-01A	Cluster B2	FALSE	FALSE	1.22	0	0.5	0.04	0.2	0	FALSE	0.92	1.22	0.09	0.01	0.07
TCGA-A6-6649-01A	Cluster A2	FALSE	FALSE	2.06	0	0.49	-0.03	-0.44	0	FALSE	1.31	2.06	0.01	0.12	0.11
TCGA-A6-6650-01A	Cluster A2	FALSE	TRUE	-1.12	0	0.51	0.04	0.2	0	FALSE	-0.13	-1.12	0.09	-0.2	-0.02
TCGA-A6-6652-01A	Cluster A2	FALSE	TRUE	-0.34	0	0.5	0.02	0.24	0	TRUE	-0.34	-0.3	0.23	-0.05	-0.11
TCGA-A6-6654-01A	Cluster B2	FALSE	TRUE	-2.96	0	0.5	0.01	-0.21	0	FALSE	0.14	-2.96	-0.45	0	-0.01
TCGA-A6-6780-01A	Cluster B2	FALSE	FALSE	0.11	0	0.51	0.07	0.85	0	TRUE	0.11	-4.4	-0.35	-0.11	-0.13
TCGA-A6-A566-01A	Cluster A2	FALSE	TRUE	-0.54	0	0.5	-0.01	-0.47	0	TRUE	-0.54	-1.72	-0.36	0.03	0.02
TCGA-A6-A567-01A	Cluster A2	FALSE	TRUE	-1.1	0	0.5	-0.01	0.12	0	TRUE	-1.1	2.91	0.18	0.06	0.12
TCGA-A6-A56B-01A	Cluster A2	FALSE	TRUE	-0.09	0	0.5	0	0.07	0	FALSE	-0.66	-0.09	-0.12	0.01	0.09
TCGA-AA-3489-01A	Cluster B2	FALSE	FALSE	0.01	0	0.5	-0.04	-0.59	0	FALSE	0.56	0.01	-0.15	0	0.11
TCGA-AA-3492-01A	Cluster B2	FALSE	TRUE	-1.04	0	0.5	0	0.3	0	TRUE	-1.04	-1.06	0.05	0.04	-0.18
TCGA-AA-3496-01A	Cluster B2	FALSE	FALSE	1.82	0	0.5	0.01	-0.05	0	TRUE	1.82	-1.48	-0.28	-0.17	0.12
TCGA-AA-3509-01A	Cluster B2	FALSE	FALSE	0.8	0	0.5	0.01	0.07	0	FALSE	-1.33	0.8	0.01	0.14	-0.07
TCGA-AA-3511-01A	Cluster A2	FALSE	FALSE	2.31	0	0.5	-0.01	-0.15	0	FALSE	-1.87	2.31	0.17	0.38	-0.12
TCGA-AA-3526-01A	Cluster B2	FALSE	TRUE	-2.23	0	0.5	-0.03	0.05	0	FALSE	-0.7	-2.23	0.13	0.08	-0.28
TCGA-AA-3655-01A	Cluster B2	FALSE	TRUE	-1.4	0	0.5	0.02	0.16	0	FALSE	0.54	-1.4	0.01	0	-0.16
TCGA-AA-3660-01A	Cluster A2	FALSE	TRUE	-0.32	0	0.5	-0.01	-0.13	0	TRUE	-0.32	2.7	0.03	0.17	0.17
TCGA-AA-3685-01A	Cluster B2	FALSE	FALSE	1.17	0	0.51	-0.01	-0.13	0	FALSE	0.48	1.17	0.19	0.25	-0.05
TCGA-AA-3712-01A	Cluster A2	FALSE	TRUE	-0.64	0	0.5	0.01	0.04	0	TRUE	-0.64	1.91	0.22	0.15	0.02
TCGA-AA-3713-01A	Cluster B2	FALSE	FALSE	1.65	0	0.5	0.01	0.19	0	TRUE	1.65	-0.73	-0.12	-0.03	0.01
TCGA-AA-A01P-01A	Cluster B2	FALSE	FALSE	2.08	0	0.5	0.02	0.39	0	TRUE	2.08	-3.09	-0.09	-0.15	-0.12
TCGA-AA-A01X-01A	Cluster A2	FALSE	FALSE	3.14	0	0.5	0.01	0.02	0	FALSE	0.17	3.14	0.15	-0.02	0.21
TCGA-AA-A01Z-01A	Cluster A2	FALSE	FALSE	1.77	0	0.5	0.01	0.2	0	FALSE	-0.29	1.77	0.3	0.02	-0.1
TCGA-AA-A02Y-01A	Cluster B2	FALSE	TRUE	-0.06	0	0.5	0.03	0.4	0	TRUE	-0.06	-1.01	0.25	-0.07	-0.15
TCGA-AD-6548-01A	Cluster B2	FALSE	TRUE	-0.55	0	0.5	-0.06	-0.14	0	TRUE	-0.55	-1.4	-0.14	0.21	-0.1
TCGA-AD-6888-01A	Cluster A2	FALSE	TRUE	-1.25	0	0.5	0.04	0.28	0	TRUE	-1.25	-0.11	0.35	-0.03	-0.15
TCGA-AD-6890-01A	Cluster A2	FALSE	FALSE	0.6	0	0.5	0.01	0.08	0	TRUE	0.6	3.42	0.43	0.16	0
TCGA-AD-6895-01A	Cluster B2	FALSE	FALSE	0.71	0	0.51	0.01	0.82	0	TRUE	0.71	-1.55	0.11	0.17	-0.28
TCGA-AD-6899-01A	Cluster B2	FALSE	TRUE	-1.4	0	0.5	0.01	-0.2	0	FALSE	0.09	-1.4	-0.21	0.1	-0.07
TCGA-AD-6901-01A	Cluster B2	FALSE	TRUE	-1.15	0	0.5	-0.03	0.01	0	FALSE	-0.33	-1.15	-0.11	0.18	-0.09
TCGA-AD-6964-01A	Cluster B2	FALSE	FALSE	2.46	0	0.5	0.04	-0.1	0	TRUE	2.46	-2.54	-0.32	-0.08	0.02
TCGA-AD-A5EJ-01A	Cluster A2	FALSE	TRUE	-1.42	0	0.51	0.02	0.45	0	TRUE	-1.42	-0.74	-0.09	-0.06	-0.04
TCGA-AD-A5EK-01A	Cluster A2	FALSE	FALSE	0	0	0.5	0.03	0.22	0	TRUE	0	-1.98	0.25	-0.13	-0.23
TCGA-AF-2687-01A	Cluster B2	FALSE	TRUE	-2.95	0	0.5	-0.01	-0.19	0	FALSE	-0.81	-2.95	-0.31	0.21	-0.18
TCGA-AF-2690-01A	Cluster B2	FALSE	TRUE	-0.9	0	0.5	0.02	-0.37	0	FALSE	0.88	-0.9	-0.27	0.09	0.01
TCGA-AF-5654-01A	Cluster B2	FALSE	FALSE	1.48	0	0.5	0.07	1.21	0	FALSE	-0.35	1.48	0.29	0.13	-0.09
TCGA-AF-6136-01A	Cluster A2	FALSE	FALSE	2.03	0	0.5	0	-0.21	0	FALSE	0.31	2.03	0.03	-0.02	0.15
TCGA-AF-6655-01A	Cluster A2	FALSE	FALSE	0.63	0	0.5	-0.01	0.21	0	FALSE	-1.6	0.63	0.16	0.48	-0.34
TCGA-AF-A56K-01A	Cluster B2	FALSE	TRUE	-0.38	0	0.5	-0.03	-0.35	0	FALSE	-0.31	-0.38	0.12	-0.01	-0.07
TCGA-AF-A56L-01A	Cluster B2	FALSE	TRUE	-0.79	0	0.5	0	0.02	0	FALSE	0.52	-0.79	0.01	-0.11	0.03
TCGA-AF-A56N-01A	Cluster A2	FALSE	FALSE	0.26	0	0.5	0	0.05	0	FALSE	-0.26	0.26	0.19	-0.1	-0.01
TCGA-AG-3591-01A	Cluster A2	FALSE	FALSE	0.63	0	0.5	-0.02	-0.11	0	FALSE	-0.13	0.63	-0.05	0	0.06
TCGA-AG-3731-01A	Cluster B2	FALSE	FALSE	0.24	0	0.5	-0.01	-0.22	0	TRUE	0.24	-1.37	-0.08	0.31	-0.22
TCGA-AG-3742-01A	Cluster A2	FALSE	TRUE	-0.17	0	0.51	0.01	0.14	0	TRUE	-0.17	-1.5	0.08	-0.05	-0.19
TCGA-AG-4021-01A	Cluster A2	FALSE	TRUE	-0.78	0	0.5	-0.03	-0.05	0	FALSE	-2.39	-0.78	-0.21	0.09	-0.07
TCGA-AG-4022-01A	Cluster B2	FALSE	TRUE	-0.48	0	0.5	-0.04	-0.17	0	TRUE	-0.48	1.7	-0.01	0.31	0.01
TCGA-AH-6544-01A	Cluster A2	FALSE	FALSE	2.89	0	0.5	0.03	0.24	0	FALSE	-0.83	2.89	0.34	0.18	-0.05
TCGA-AH-6547-01A	Cluster B2	FALSE	FALSE	0.52	0	0.49	-0.01	-0.47	0	FALSE	1.45	0.52	-0.31	-0.01	0.26
TCGA-AH-6903-01A	Cluster A2	FALSE	FALSE	1.1	0	0.5	0.04	0.24	0	FALSE	-0.25	1.1	0.14	0	0.01
TCGA-AM-5821-01A	Cluster B2	FALSE	FALSE	1.11	0	0.51	0.1	2.14	0	TRUE	1.11	-1.66	0.1	0.08	-0.22
TCGA-AU-3779-01A	Cluster A2	FALSE	TRUE	-3.4	0	0.5	-0.02	-0.28	0	FALSE	1.06	-3.4	-0.03	-0.2	-0.24
TCGA-AU-6004-01A	Cluster B2	FALSE	TRUE	-1.16	0	0.5	-0.05	-0.27	0	FALSE	0.01	-1.16	-0.08	0.09	-0.1
TCGA-AY-5543-01A	Cluster B2	FALSE	TRUE	-2.02	0	0.51	0.04	0.73	0	FALSE	-0.02	-2.02	0.21	-0.18	-0.2
TCGA-AY-6196-01A	Cluster B2	FALSE	TRUE	-2.51	0	0.49	0.01	-0.72	0	FALSE	1.71	-2.51	-0.29	-0.1	-0.02
TCGA-AY-A69D-01A	Cluster A2	FALSE	TRUE	-0.15	0	0.5	0.01	0.11	0	FALSE	0.57	-0.15	0.15	-0.25	0.04
TCGA-AY-A71X-01A	Cluster A2	FALSE	FALSE	0.62	0	0.5	0.06	0.37	0	FALSE	-1.14	0.62	0.19	-0.04	-0.07
TCGA-AY-A8YK-01A	Cluster A2	FALSE	FALSE	4.11	0	0.5	0	-0.13	0	FALSE	-0.3	4.11	0.27	0.1	0.14
TCGA-AZ-4315-01A	Cluster B2	FALSE	TRUE	-0.25	0	0.51	0.02	0.12	0	TRUE	-0.25	0.5	0.03	0.14	-0.02
TCGA-AZ-4616-01A	Cluster B2	FALSE	TRUE	-0.66	0	0.5	0.02	1.1	0	TRUE	-0.66	1.09	0.31	0.27	-0.18
TCGA-AZ-5403-01A	Cluster A2	FALSE	FALSE	1.11	0	0.5	-0.06	-0.32	0	FALSE	-3	1.11	-0.13	0.3	0.06
TCGA-AZ-5407-01A	Cluster A2	FALSE	FALSE	0.5	0	0.5	0	-0.2	0	FALSE	1.79	0.5	0	-0.26	0.18
TCGA-AZ-6601-01A	Cluster B2	FALSE	FALSE	0.65	0	0.5	-0.03	-0.26	0	TRUE	0.65	-3.1	-0.33	-0.05	-0.06
TCGA-AZ-6603-01A	Cluster B2	FALSE	TRUE	-0.58	0	0.5	0.01	0.17	0	FALSE	1.31	-0.58	0.09	0.16	-0.18
TCGA-AZ-6606-01A	Cluster A2	FALSE	TRUE	-0.13	0	0.5	0.03	0.42	0	TRUE	-0.13	1.2	0.29	0.1	-0.19
TCGA-AZ-6607-01A	Cluster B2	FALSE	TRUE	-0.26	0	0.5	-0.02	0.66	0	TRUE	-0.26	-0.65	-0.14	0.22	-0.11
TCGA-AZ-6608-01A	Cluster A2	FALSE	FALSE	0.18	0	0.5	0.04	0.26	0	FALSE	0.23	0.18	0.33	-0.26	-0.01
TCGA-BM-6198-01A	Cluster B2	FALSE	TRUE	-0.45	0	0.5	-0.03	-0.25	0	TRUE	-0.45	-0.91	-0.09	0.11	-0.02
TCGA-CA-5255-01A	Cluster B2	FALSE	FALSE	0.69	0	0.5	0.04	0.34	0	FALSE	-1.39	0.69	0.2	0.12	-0.14
TCGA-CA-5256-01A	Cluster B2	FALSE	FALSE	0.13	0	0.51	0.01	-0.04	0	FALSE	1.62	0.13	0.08	-0.29	0.1
TCGA-CA-5796-01A	Cluster A2	FALSE	FALSE	1.38	0	0.5	0.03	-0.01	0	TRUE	1.38	-2.81	-0.15	-0.33	0
TCGA-CA-5797-01A	Cluster B2	FALSE	TRUE	-0.31	0	0.5	0	-0.09	0	TRUE	-0.31	-2.6	0.02	-0.11	-0.1
TCGA-CA-6715-01A	Cluster A2	FALSE	TRUE	-1.09	0	0.51	0.04	0.26	0	TRUE	-1.09	-2.14	0.19	-0.23	-0.14
TCGA-CA-6716-01A	Cluster A2	FALSE	FALSE	0.94	0	0.5	0.03	0.2	0	FALSE	-0.6	0.94	0.22	-0.08	0.01
TCGA-CA-6718-01A	Cluster B2	FALSE	FALSE	2.05	0	0.5	0.03	0.94	0	TRUE	2.05	-4.95	-0.17	-0.13	-0.27
TCGA-CA-6719-01A	Cluster B2	FALSE	TRUE	-3.63	0	0.5	-0.02	-0.27	0	FALSE	-0.47	-3.63	-0.24	0.02	-0.21
TCGA-CI-6620-01A	Cluster A2	FALSE	FALSE	2.87	0	0.49	0	-0.2	0	FALSE	1.78	2.87	0.01	-0.09	0.3
TCGA-CI-6622-01A	Cluster A2	FALSE	FALSE	4.34	0	0.5	0.02	0.15	0	FALSE	-1.33	4.34	0.32	0.25	0.06
TCGA-CK-4951-01A	Cluster B2	FALSE	FALSE	0.21	0	0.5	-0.04	0.18	0	TRUE	0.21	-1.69	-0.05	0.19	-0.24
TCGA-CK-5912-01A	Cluster A2	FALSE	FALSE	0.73	0	0.5	0.03	0.02	0	FALSE	0.56	0.73	0.18	-0.06	-0.05
TCGA-CK-5914-01A	Cluster B2	FALSE	FALSE	0.17	0	0.5	0.01	0.25	0	TRUE	0.17	-1.85	0.24	0.04	-0.26
TCGA-CK-5915-01A	Cluster A2	FALSE	FALSE	0.5	0	0.5	0.06	0.22	0	FALSE	-0.26	0.5	0.24	-0.19	0
TCGA-CK-5916-01A	Cluster B2	FALSE	FALSE	1.32	0	0.5	0.03	0.15	0	TRUE	1.32	-4.03	-0.37	-0.24	-0.02
TCGA-CK-6746-01A	Cluster B2	FALSE	FALSE	2.07	0	0.51	0.05	0.49	0	TRUE	2.07	-1.37	-0.06	0.04	-0.1
TCGA-CK-6748-01A	Cluster A2	FALSE	TRUE	-2.42	0	0.5	-0.05	-0.35	0	FALSE	-2.35	-2.42	-0.25	0	-0.09
TCGA-CL-4957-01A	Cluster A2	FALSE	FALSE	4.16	0	0.5	0.01	0.06	0	FALSE	-0.65	4.16	0.27	0.13	0.16
TCGA-CL-5917-01A	Cluster A2	FALSE	TRUE	-1.55	0	0.5	0	0.13	0	TRUE	-1.55	-1	0.06	-0.04	-0.15
TCGA-CM-4743-01A	Cluster B2	FALSE	FALSE	1.25	0	0.52	0.07	1.49	0	TRUE	1.25	-0.71	0.25	0.01	-0.21
TCGA-CM-4747-01A	Cluster A2	FALSE	FALSE	1.47	0	0.5	0.02	0.01	0	FALSE	-0.67	1.47	0.12	-0.19	0.14
TCGA-CM-4751-01A	Cluster B2	FALSE	FALSE	1.68	0	0.5	-0.05	-0.23	0	TRUE	1.68	0.31	0.05	0.12	-0.02
TCGA-CM-5344-01A	Cluster A2	FALSE	FALSE	0.98	0	0.5	0.01	0.08	0	FALSE	-0.82	0.98	-0.07	0.11	0.04
TCGA-CM-5348-01A	Cluster A2	FALSE	TRUE	-3.27	0	0.5	-0.03	-0.1	0	FALSE	-0.92	-3.27	-0.48	0.04	-0.07
TCGA-CM-5349-01A	Cluster A2	FALSE	TRUE	-2.49	0	0.5	-0.05	-0.32	0	FALSE	-1.2	-2.49	-0.29	-0.03	0.01
TCGA-CM-5863-01A	Cluster B2	FALSE	TRUE	-0.17	0	0.5	-0.01	-0.15	0	FALSE	-2.16	-0.17	-0.23	0.18	-0.01
TCGA-CM-5868-01A	Cluster A2	FALSE	FALSE	1.48	0	0.5	-0.01	-0.04	0	FALSE	-1.6	1.48	0.11	0.22	0
TCGA-CM-6161-01A	Cluster A2	FALSE	FALSE	1.7	0	0.5	0	-0.11	0	TRUE	1.7	0.47	-0.21	-0.2	0.28
TCGA-CM-6162-01A	Cluster B2	FALSE	TRUE	-2	0	0.5	-0.02	-0.01	0	FALSE	-0.59	-2	-0.33	0.21	-0.13
TCGA-CM-6164-01A	Cluster B2	FALSE	FALSE	1.33	0	0.5	-0.01	0.01	0	TRUE	1.33	-3.03	0.07	-0.12	-0.2
TCGA-CM-6166-01A	Cluster A2	FALSE	TRUE	-0.65	0	0.5	0.03	0.27	0	TRUE	-0.65	1.2	0.22	-0.08	0.01
TCGA-CM-6169-01A	Cluster B2	FALSE	FALSE	0.35	0	0.5	0.03	-0.03	0	TRUE	0.35	-4.27	-0.38	-0.06	-0.12
TCGA-CM-6172-01A	Cluster A2	FALSE	FALSE	2.27	0	0.5	0.01	-0.21	0	FALSE	-0.22	2.27	-0.08	0.16	0.15
TCGA-CM-6674-01A	Cluster B2	FALSE	TRUE	-0.74	0	0.5	-0.03	-0.15	0	TRUE	-0.74	-2.72	-0.19	0.08	-0.14
TCGA-CM-6678-01A	Cluster A2	FALSE	TRUE	-0.82	0	0.5	0.01	0	0	TRUE	-0.82	1.41	0.21	0.03	-0.02
TCGA-D5-5537-01A	Cluster A2	FALSE	TRUE	-1.22	0	0.5	0.05	0.01	0	FALSE	0.41	-1.22	0.04	-0.33	0
TCGA-D5-5538-01A	Cluster B2	FALSE	TRUE	-3.42	0	0.5	-0.02	-0.17	0	FALSE	-1.7	-3.42	-0.3	-0.01	-0.12
TCGA-D5-5539-01A	Cluster A2	FALSE	TRUE	-0.76	0	0.49	-0.07	-0.45	0	FALSE	-1.97	-0.76	-0.4	0.13	0.04
TCGA-D5-5540-01A	Cluster B2	FALSE	TRUE	-1.05	0	0.51	0	0.13	0	TRUE	-1.05	-1.17	0.09	-0.11	-0.08
TCGA-D5-6530-01A	Cluster B2	FALSE	FALSE	1.08	0	0.5	-0.01	0.1	0	TRUE	1.08	-3.67	-0.12	-0.02	-0.25
TCGA-D5-6533-01A	Cluster B2	FALSE	FALSE	0.18	0	0.5	0.04	0.56	0	TRUE	0.18	-2.88	0.14	-0.14	-0.24
TCGA-D5-6534-01A	Cluster B2	FALSE	TRUE	-2.33	0	0.49	0	-0.27	0	FALSE	1.4	-2.33	-0.45	-0.08	0.09
TCGA-D5-6535-01A	Cluster B2	FALSE	TRUE	-2.01	0	0.5	0.03	0.2	0	FALSE	0.14	-2.01	-0.07	-0.09	-0.02
TCGA-D5-6536-01A	Cluster A2	FALSE	TRUE	-3.17	0	0.5	-0.06	-0.05	0	TRUE	-3.17	0.4	-0.05	0.31	-0.09
TCGA-D5-6538-01A	Cluster A2	FALSE	TRUE	-0.81	0	0.5	0.04	0.21	0	TRUE	-0.81	0.06	0	-0.23	0.07
TCGA-D5-6539-01A	Cluster A2	FALSE	FALSE	2.46	0	0.5	0.01	-0.23	0	FALSE	1.35	2.46	0.06	-0.01	0.18
TCGA-D5-6541-01A	Cluster B2	FALSE	TRUE	-2.42	0	0.5	0.03	-0.15	0	FALSE	-0.11	-2.42	-0.27	0.07	-0.14
TCGA-D5-6920-01A	Cluster A2	FALSE	FALSE	2.88	0	0.5	-0.01	-0.03	0	FALSE	-0.08	2.88	0.08	0.19	0.09
TCGA-D5-6922-01A	Cluster B2	FALSE	FALSE	0.25	0	0.5	0.01	-0.11	0	TRUE	0.25	-2.15	-0.29	0.07	-0.04
TCGA-D5-6924-01A	Cluster B2	FALSE	FALSE	0.47	0	0.5	0.05	-0.11	0	TRUE	0.47	-2.96	-0.35	-0.13	0.01
TCGA-D5-6926-01A	Cluster B2	FALSE	TRUE	-3.23	0	0.5	-0.01	-0.08	0	FALSE	-2.09	-3.23	-0.26	0.2	-0.27
TCGA-D5-6927-01A	Cluster B2	FALSE	TRUE	-0.62	0	0.5	0	0.16	0	TRUE	-0.62	-3.87	-0.26	0.01	-0.22
TCGA-D5-6929-01A	Cluster A2	FALSE	FALSE	0.7	0	0.5	0.06	-0.32	0	TRUE	0.7	-1.89	-0.13	-0.21	0.06
TCGA-D5-6930-01A	Cluster B2	FALSE	FALSE	1.27	0	0.5	-0.04	-0.37	0	TRUE	1.27	-1.04	-0.01	0.03	-0.05
TCGA-DC-5337-01A	Cluster B2	FALSE	FALSE	0.11	0	0.51	0	0.24	0	TRUE	0.11	0.28	0.23	-0.03	-0.05
TCGA-DC-6154-01A	Cluster A2	FALSE	TRUE	-1.71	0	0.5	0.02	0.06	0	FALSE	-0.87	-1.71	-0.07	-0.2	-0.01
TCGA-DC-6155-01A	Cluster A2	FALSE	TRUE	-0.07	0	0.5	0.06	0	0	TRUE	-0.07	2.67	0.11	0.03	0.18
TCGA-DC-6156-01A	Cluster B2	FALSE	TRUE	-5.21	0	0.49	-0.01	-0.37	0	FALSE	0.43	-5.21	-0.49	-0.21	-0.1
TCGA-DC-6157-01A	Cluster B2	FALSE	TRUE	-1.07	0	0.5	0.02	0.1	0	FALSE	0.08	-1.07	0.02	-0.22	0.14
TCGA-DC-6158-01A	Cluster B2	FALSE	TRUE	0	0	0.5	-0.01	-0.11	0	TRUE	0	-1.93	-0.11	0.28	-0.23
TCGA-DC-6682-01A	Cluster A2	FALSE	TRUE	-3.22	0	0.5	0.04	0.48	0	FALSE	1.19	-3.22	0.1	-0.33	-0.1
TCGA-DC-6683-01A	Cluster A2	FALSE	TRUE	-2.67	0	0.5	-0.02	-0.15	0	FALSE	-1.16	-2.67	-0.24	-0.19	0
TCGA-DM-A0XF-01A	Cluster B2	FALSE	FALSE	0.13	0	0.5	0.01	0.03	0	TRUE	0.13	-2.16	0.13	-0.15	-0.16
TCGA-DM-A1D0-01A	Cluster A2	FALSE	TRUE	-0.9	0	0.51	0.06	0.37	0	TRUE	-0.9	0.69	0.17	-0.09	0
TCGA-DM-A1D6-01A	Cluster A2	FALSE	FALSE	0.76	0	0.51	0.06	0.34	0	FALSE	-0.25	0.76	0.25	-0.07	-0.09
TCGA-DM-A1D9-01A	Cluster B2	FALSE	FALSE	0.65	0	0.5	0.01	0.26	0	FALSE	-0.48	0.65	0.11	-0.15	0.08
TCGA-DM-A1DA-01A	Cluster B2	FALSE	TRUE	-0.98	0	0.5	0.02	0.09	0	TRUE	-0.98	-0.79	-0.04	0.09	-0.06
TCGA-DM-A1DB-01A	Cluster B2	FALSE	FALSE	2.19	0	0.5	0.04	0.05	0	TRUE	2.19	-3.19	0.1	-0.45	-0.04
TCGA-DM-A1HB-01A	Cluster A2	FALSE	FALSE	1.15	0	0.51	-0.01	0.28	0	FALSE	-2.6	1.15	0.03	0.29	-0.1
TCGA-DM-A280-01A	Cluster A2	FALSE	TRUE	-0.06	0	0.5	-0.03	0.11	0	FALSE	-2.38	-0.06	0.01	0.23	-0.15
TCGA-DM-A285-01A	Cluster A2	FALSE	FALSE	0.5	0	0.5	0.01	0.1	0	FALSE	-2.36	0.5	-0.2	0.15	0.03
TCGA-DM-A288-01A	Cluster A2	FALSE	FALSE	0.07	0	0.5	0	0.11	0	FALSE	-2.66	0.07	0.01	-0.01	-0.05
TCGA-DM-A28A-01A	Cluster B2	FALSE	TRUE	-1.92	0	0.5	0.02	0.16	0	TRUE	-1.92	0.53	0.2	0.12	-0.11
TCGA-DM-A28G-01A	Cluster A2	FALSE	FALSE	1.41	0	0.5	0.03	0.08	0	TRUE	1.41	0.2	0.05	-0.33	0.15
TCGA-DM-A28H-01A	Cluster A2	FALSE	FALSE	0.5	0	0.5	0.05	0.26	0	FALSE	-0.17	0.5	0	-0.16	0.11
TCGA-DM-A28K-01A	Cluster A2	FALSE	TRUE	-0.02	0	0.5	0.02	0.29	0	FALSE	-0.5	-0.02	-0.04	0.08	0.01
TCGA-DT-5265-01A	Cluster A2	FALSE	TRUE	-0.7	0	0.5	-0.07	-0.07	0	FALSE	-2.02	-0.7	-0.2	0.23	-0.11
TCGA-DY-A0XA-01A	Cluster A2	FALSE	FALSE	0.66	0	0.5	0.04	0.06	0	TRUE	0.66	-1.71	0.03	-0.26	-0.05
TCGA-DY-A1DC-01A	Cluster B2	FALSE	FALSE	0.66	0	0.5	0	-0.02	0	FALSE	-0.28	0.66	0.03	-0.09	0.13
TCGA-DY-A1DF-01A	Cluster A2	FALSE	TRUE	-0.04	0	0.51	0.04	0.25	0	TRUE	-0.04	1.69	0.1	0.13	-0.03
TCGA-DY-A1DG-01A	Cluster B2	FALSE	FALSE	0.6	0	0.5	0.04	0.32	0	FALSE	0.2	0.6	0.31	-0.19	0
TCGA-EF-5830-01A	Cluster B2	FALSE	TRUE	-0.6	0	0.51	0.02	0.12	0	TRUE	-0.6	-0.94	0.06	-0.28	0.05
TCGA-EI-6509-01A	Cluster A2	FALSE	TRUE	-1.08	0	0.5	0.01	0.05	0	FALSE	-1.07	-1.08	-0.1	-0.03	-0.07
TCGA-EI-6511-01A	Cluster B2	FALSE	FALSE	1.81	0	0.5	0.05	0.06	0	TRUE	1.81	-4.22	-0.29	-0.35	0.02
TCGA-EI-6512-01A	Cluster B2	FALSE	TRUE	-0.62	0	0.5	0	0.23	0	TRUE	-0.62	-1.39	-0.06	0.05	-0.1
TCGA-EI-6513-01A	Cluster B2	FALSE	TRUE	0	0	0.5	0.03	0.18	0	TRUE	0	-2.5	-0.06	-0.22	-0.11
TCGA-EI-6514-01A	Cluster A2	FALSE	TRUE	-0.59	0	0.5	0.02	0.06	0	FALSE	-0.62	-0.59	-0.07	0.01	0
TCGA-EI-6881-01A	Cluster A2	FALSE	FALSE	0.29	0	0.5	0	0.27	0	TRUE	0.29	1.33	0.21	0	-0.05
TCGA-EI-6917-01A	Cluster B2	FALSE	FALSE	0.6	0	0.5	0.04	0.19	0	TRUE	0.6	-2.59	-0.38	0.02	0
TCGA-EI-7002-01A	Cluster A2	FALSE	TRUE	-1.76	0	0.5	0.02	0	0	FALSE	-0.68	-1.76	-0.07	0	-0.09
TCGA-F4-6569-01A	Cluster A2	FALSE	TRUE	-1.7	0	0.49	-0.05	-0.73	0	FALSE	-0.05	-1.7	-0.44	0.04	0.08
TCGA-F4-6703-01A	Cluster B2	FALSE	FALSE	0.21	0	0.5	0.03	0.14	0	TRUE	0.21	-3.34	-0.36	0.07	-0.13
TCGA-F4-6805-01A	Cluster A2	FALSE	TRUE	-1.57	0	0.49	-0.07	-0.44	0	FALSE	-1.13	-1.57	-0.43	0.13	0.05
TCGA-F4-6807-01A	Cluster B2	FALSE	FALSE	1.82	0	0.5	0.01	-0.14	0	TRUE	1.82	-1.54	-0.22	-0.01	0.03
TCGA-F4-6808-01A	Cluster A2	FALSE	FALSE	0.53	0	0.5	0.01	0.27	0	FALSE	-1.33	0.53	0.26	0.07	-0.1
TCGA-F4-6809-01A	Cluster B2	FALSE	FALSE	0.06	0	0.49	-0.03	-0.57	0	FALSE	0.83	0.06	-0.02	-0.11	0.13
TCGA-F4-6855-01A	Cluster A2	FALSE	TRUE	-2.36	0	0.5	0.02	-0.21	0	FALSE	-1.19	-2.36	-0.32	0.05	-0.07
TCGA-F5-6465-01A	Cluster B2	FALSE	TRUE	-3.37	0	0.5	-0.01	-0.34	0	FALSE	1.96	-3.37	-0.26	-0.25	-0.02
TCGA-F5-6571-01A	Cluster A2	FALSE	FALSE	2.49	0	0.49	0.01	-0.09	0	TRUE	2.49	-2.43	-0.4	-0.34	0.19
TCGA-F5-6702-01A	Cluster B2	FALSE	FALSE	0.11	0	0.5	0	-0.08	0	FALSE	-0.76	0.11	-0.39	0.26	0.05
TCGA-F5-6812-01A	Cluster B2	FALSE	TRUE	-1.44	0	0.5	0.01	-0.1	0	FALSE	1.29	-1.44	-0.05	-0.03	-0.06
TCGA-F5-6813-01A	Cluster B2	FALSE	TRUE	-0.44	0	0.5	0.01	-0.19	0	FALSE	0.39	-0.44	-0.05	-0.02	0.05
TCGA-F5-6814-01A	Cluster B2	FALSE	FALSE	0.98	0	0.51	0.11	1.57	0	TRUE	0.98	-0.89	0.01	0.08	-0.14
TCGA-F5-6861-01A	Cluster A2	FALSE	TRUE	-1.35	0	0.5	0.01	0.03	0	TRUE	-1.35	0.32	0.01	0	0.04
TCGA-F5-6863-01A	Cluster A2	FALSE	FALSE	1.4	0	0.5	0.04	0.16	0	FALSE	-0.26	1.4	0.18	-0.08	0.07
TCGA-F5-6864-01A	Cluster B2	FALSE	TRUE	-2.92	0	0.5	0	-0.3	0	FALSE	0.41	-2.92	-0.3	-0.12	0.02
TCGA-G4-6294-01A	Cluster A2	FALSE	FALSE	0.05	0	0.5	-0.01	0.01	0	FALSE	0.1	0.05	0.15	-0.1	-0.04
TCGA-G4-6297-01A	Cluster B2	FALSE	TRUE	-1.19	0	0.5	-0.05	-0.44	0	TRUE	-1.19	-2.43	-0.2	0.13	-0.15
TCGA-G4-6298-01A	Cluster A2	FALSE	FALSE	2.62	0	0.51	0	0.14	0	FALSE	-1.44	2.62	0.13	0.21	0.04
TCGA-G4-6303-01A	Cluster A2	FALSE	TRUE	-2.1	0	0.5	0	-0.06	0	FALSE	-0.77	-2.1	-0.19	-0.14	-0.02
TCGA-G4-6304-01A	Cluster B2	FALSE	FALSE	1.38	0	0.5	0	0.11	0	TRUE	1.38	-1.24	0.03	0.06	-0.15
TCGA-G4-6307-01A	Cluster A2	FALSE	FALSE	2.93	0	0.5	0.04	0.19	0	FALSE	1.44	2.93	0.19	-0.09	0.2
TCGA-G4-6310-01A	Cluster A2	FALSE	FALSE	1.87	0	0.51	0.04	0.33	0	FALSE	-0.89	1.87	0.3	0.23	-0.1
TCGA-G4-6311-01A	Cluster A2	FALSE	TRUE	-1.16	0	0.49	-0.07	-0.56	0	FALSE	-1.47	-1.16	-0.26	0.11	-0.02
TCGA-G4-6315-01A	Cluster A2	FALSE	FALSE	0.29	0	0.5	0.03	0.15	0	TRUE	0.29	3.78	0.3	0	0.16
TCGA-G4-6317-02A	Cluster A2	FALSE	FALSE	1.31	0	0.51	0.03	0.24	0	FALSE	-1.59	1.31	0.09	-0.04	0.06
TCGA-G4-6320-01A	Cluster A2	FALSE	FALSE	2.33	0	0.5	-0.01	-0.08	0	FALSE	0.91	2.33	0.17	-0.06	0.14
TCGA-G4-6323-01A	Cluster A2	FALSE	FALSE	0.07	0	0.49	-0.01	-0.37	0	FALSE	2.26	0.07	-0.01	-0.32	0.23
TCGA-G4-6626-01A	Cluster A2	FALSE	FALSE	0.13	0	0.5	0.01	0.22	0	TRUE	0.13	-0.41	0.36	-0.1	-0.08
TCGA-G4-6627-01A	Cluster B2	FALSE	FALSE	0.22	0	0.5	-0.08	-0.59	0	TRUE	0.22	1.01	0.02	0.11	0.04
TCGA-G4-6628-01A	Cluster B2	FALSE	FALSE	2.32	0	0.5	-0.03	-0.04	0	TRUE	2.32	-1.68	-0.15	0.05	-0.04
TCGA-G5-6233-01A	Cluster A2	FALSE	TRUE	-1.72	0	0.5	-0.05	-0.19	0	FALSE	-1.93	-1.72	-0.05	0.21	-0.28
TCGA-G5-6572-01A	Cluster A2	FALSE	TRUE	-0.86	0	0.51	0.04	0	0	TRUE	-0.86	0.02	0.08	-0.12	0
TCGA-G5-6641-01A	Cluster A2	FALSE	FALSE	1.43	0	0.51	0.06	0.36	0	FALSE	-0.33	1.43	0.18	0.04	-0.02
TCGA-NH-A50T-01A	Cluster A2	FALSE	TRUE	-0.44	0	0.5	0.02	0.26	0	FALSE	0.06	-0.44	0.14	-0.17	0
TCGA-NH-A50U-01A	Cluster A2	FALSE	TRUE	-1.84	0	0.5	0	0.05	0	FALSE	-1.54	-1.84	0.09	0.07	-0.31
TCGA-NH-A50V-01A	Cluster B2	FALSE	TRUE	-0.41	0	0.5	0.01	0.02	0	FALSE	-0.01	-0.41	0.12	0.12	-0.21
TCGA-NH-A6GB-01A	Cluster B2	FALSE	FALSE	0.85	0	0.5	0	0.06	0	TRUE	0.85	-1.66	-0.04	-0.31	0
TCGA-NH-A6GC-01A	Cluster A2	FALSE	FALSE	0.13	0	0.5	0.06	0.27	0	FALSE	0.45	0.13	0.06	-0.19	0
TCGA-NH-A8F7-01A	Cluster A2	FALSE	TRUE	-0.81	0	0.5	0.03	0.36	0	TRUE	-0.81	-0.75	0.08	-0.1	-0.11
TCGA-NH-A8F7-06A	Cluster A2	FALSE	TRUE	-0.56	0	0.5	0.06	0.39	0	FALSE	-0.56	-0.56	0.12	-0.1	-0.1
TCGA-NH-A8F8-01A	Cluster A2	FALSE	TRUE	-2.05	0	0.5	-0.02	-0.04	0	FALSE	-1.53	-2.05	0.01	0.08	-0.3
TCGA-QG-A5YV-01A	Cluster B2	FALSE	FALSE	1.25	0	0.5	0.03	0.15	0	TRUE	1.25	1.28	0.35	-0.21	0.04
TCGA-QG-A5YX-01A	Cluster A2	FALSE	FALSE	1.75	0	0.5	0.02	0.13	0	FALSE	-0.61	1.75	0.12	0.1	0.03
TCGA-QG-A5Z1-01A	Cluster A2	FALSE	TRUE	-1.91	0	0.5	0	-0.15	0	FALSE	-1.19	-1.91	-0.23	-0.11	-0.01
TCGA-SS-A7HO-01A	Cluster A2	FALSE	TRUE	-0.9	0	0.5	0.03	0.37	0	TRUE	-0.9	0.03	0.13	-0.25	0.04
TCGA-T9-A92H-01A	Cluster A2	FALSE	FALSE	0.91	0	0.51	0.02	0.24	0	TRUE	0.91	0.89	0.34	-0.05	-0.09
